# Supplementary material for: Identification of Pathogen Genomic Differences That Impact Human Immune Response and Disease during Cryptococcus neoformans Infection
Source: PubMed Central journal article supplement (PMC6635531; doi:10.1128/mbio.01440-19), 2019-07-16
Supplement: mBio.01440-19-sf001.pdf [file mBio.01440-19-sf001.pdf]

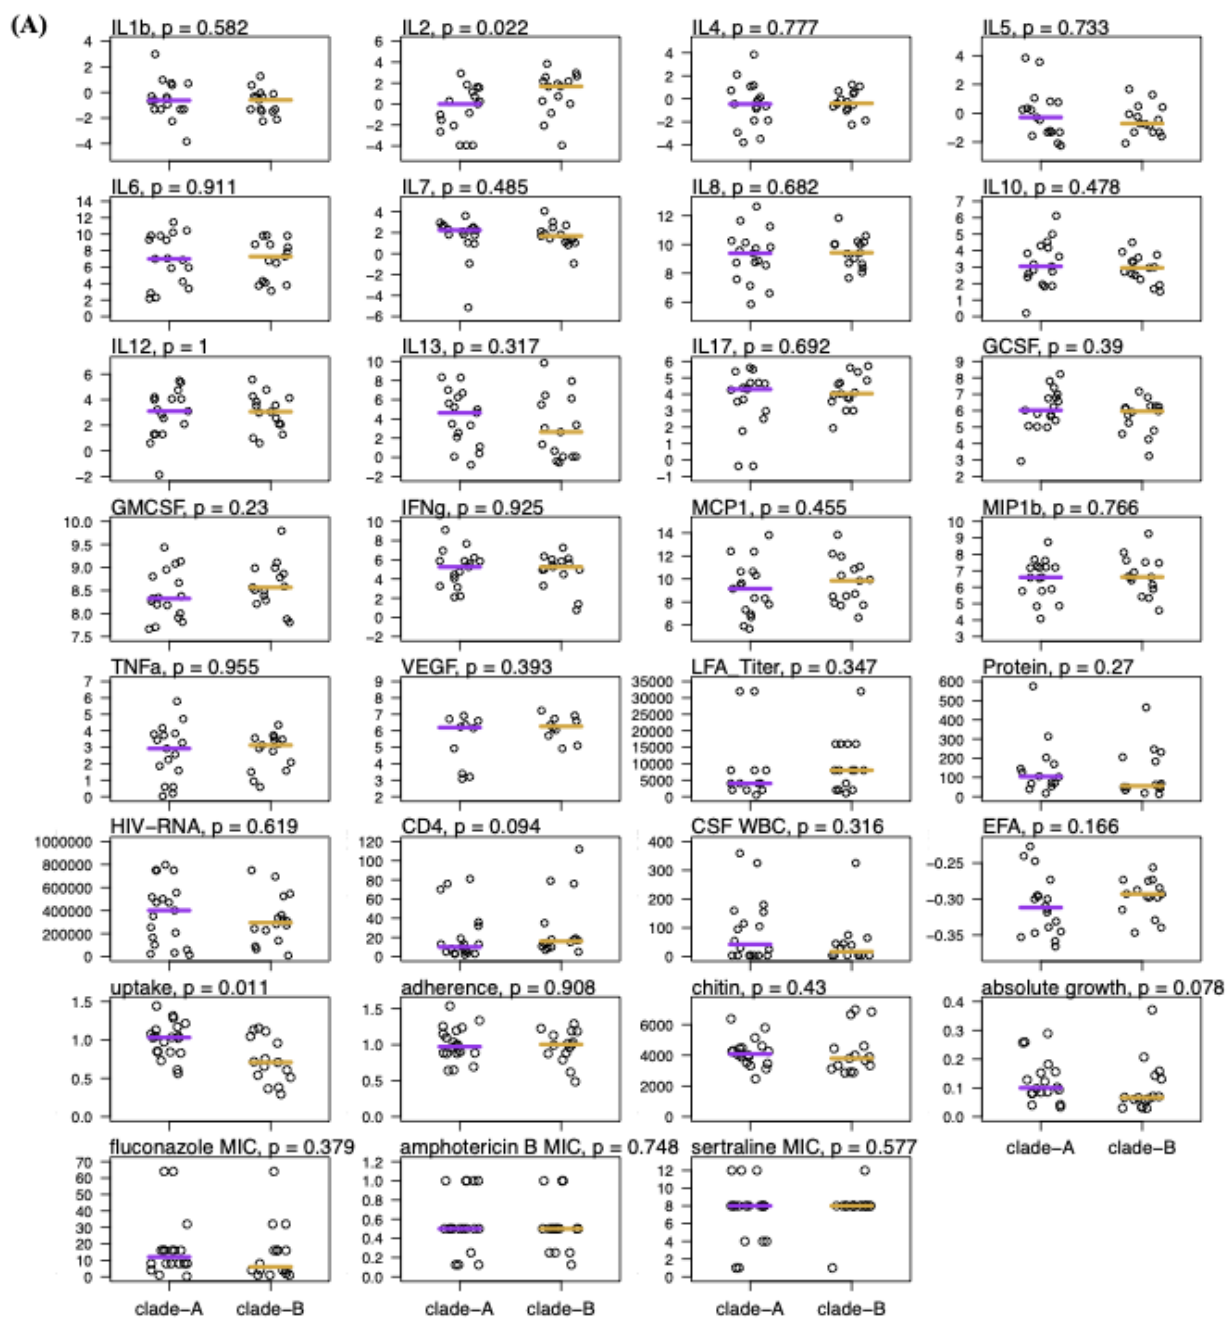

**Figure S1. Clade-specific differences in phenotype.** Bar indicates median value.
