# Supplementary material for: Identification of Pathogen Genomic Differences That Impact Human Immune Response and Disease during Cryptococcus neoformans Infection
Source: PubMed Central journal article supplement (PMC6635531; doi:10.1128/mbio.01440-19), 2019-07-16
Supplement: mBio.01440-19-sf002.pdf [file mBio.01440-19-sf002.pdf]

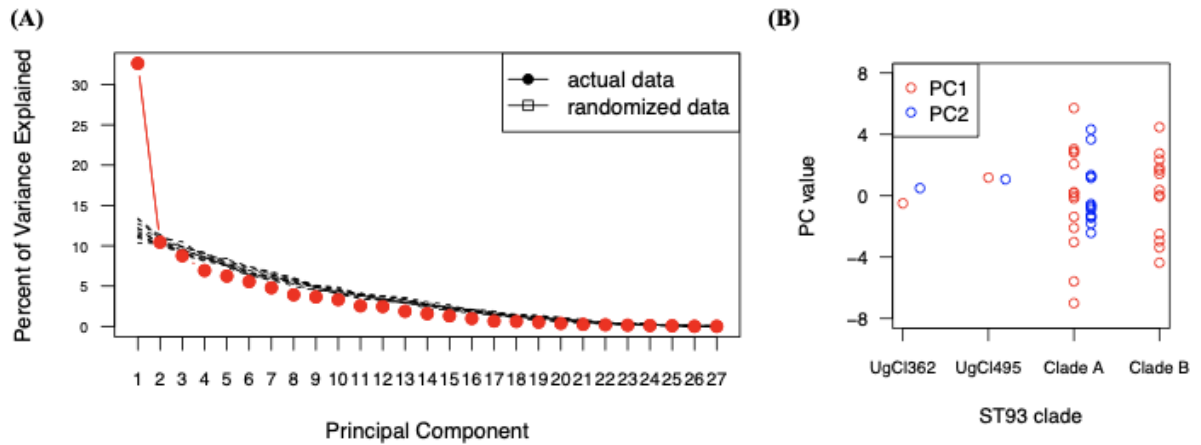

**Figure S2. PCA analysis.** A) Each dashed line represents one of 20 randomized trials. B) There was no association between PC1 or PC2 and clade.
