# Supplementary material for: Identification of Pathogen Genomic Differences That Impact Human Immune Response and Disease during Cryptococcus neoformans Infection
Source: PubMed Central journal article supplement (PMC6635531; doi:10.1128/mbio.01440-19), 2019-07-16
Supplement: mBio.01440-19-st001.pdf [file mBio.01440-19-st001.pdf]

Table S1. Genes with variants present in all ST93 genomes

| name              | chrom       | chromStart    | chromEnd      | length      | alias       | description                                                  | freq.gene | freq.up   | freq.syn  | Freq      |
|-------------------|-------------|---------------|---------------|-------------|-------------|--------------------------------------------------------------|-----------|-----------|-----------|-----------|
| CNAG_00004        | chr1        | 16736         | 19388         | 2652        | null        | hypothetical protein CNAG_00004                              | 0         | 1         | 0         | 1         |
| CNAG_00005        | chr1        | 20906         | 22642         | 1736        | null        | TPR repeat-containing protein                                | 0         | 1         | 0         | 1         |
| CNAG_00008        | chr1        | 28619         | 32831         | 4212        | null        | hypothetical protein CNAG_00008                              | 0         | 3         | 0         | 3         |
| CNAG_00010        | chr1        | 36020         | 39419         | 3399        | null        | cation transporter                                           | 1         | 0         | 0         | 1         |
| CNAG_00013        | chr1        | 45340         | 46007         | 667         | null        | hypothetical protein CNAG_00013                              | 0         | 1         | 0         | 1         |
| CNAG_00015        | chr1        | 50476         | 51193         | 717         | null        | hypothetical protein CNAG_00015                              | 0         | 1         | 0         | 1         |
| CNAG_00017        | chr1        | 54702         | 57423         | 2721        | null        | hypothetical protein CNAG_00017                              | 1         | 0         | 1         | 2         |
| CNAG_00018        | chr1        | 59229         | 61865         | 2636        | null        | hypothetical protein CNAG_00018                              | 5         | 0         | 0         | 5         |
| CNAG_00019        | chr1        | 62033         | 62415         | 382         | null        | mitochondrial import inner membrane translocase subunit TIM9 | 0         | 1         | 0         | 1         |
| CNAG_00020        | chr1        | 62588         | 66221         | 3633        | null        | hypothetical protein CNAG_00020                              | 2         | 0         | 0         | 2         |
| CNAG_00043        | chr1        | 130356        | 132334        | 1978        | null        | hypothetical protein CNAG_00043                              | 0         | 1         | 0         | 1         |
| CNAG_00073        | chr1        | 201593        | 204477        | 2884        | null        | nuclear mRNA splicing protein                                | 0         | 6         | 1         | 7         |
| CNAG_00074        | chr1        | 205680        | 208220        | 2540        | null        | protein PNS1                                                 | 1         | 0         | 2         | 3         |
| CNAG_00075        | chr1        | 208635        | 209249        | 614         | null        | hypothetical protein CNAG_00075                              | 0         | 3         | 1         | 4         |
| CNAG_07947        | chr1        | 212669        | 213106        | 437         | null        | hypothetical protein CNAG_07947                              | 0         | 1         | 0         | 1         |
| CNAG_00078        | chr1        | 217128        | 221286        | 4158        | null        | vacuolar protein                                             | 0         | 1         | 2         | 3         |
| CNAG_00079        | chr1        | 223667        | 224474        | 807         | null        | hypothetical protein CNAG_00079                              | 0         | 1         | 0         | 1         |
| CNAG_00080        | chr1        | 225551        | 227173        | 1622        | null        | hypothetical protein CNAG_00080                              | 1         | 1         | 0         | 2         |
| CNAG_00081        | chr1        | 227666        | 230931        | 3265        | null        | pre-mRNA-processing factor 6                                 | 0         | 0         | 1         | 1         |
| CNAG_00084        | chr1        | 236469        | 239638        | 3169        | null        | glutamine-tRNA ligase                                        | 1         | 1         | 0         | 2         |
| CNAG_00090        | chr1        | 249912        | 251676        | 1764        | null        | hypothetical protein CNAG_00090                              | 0         | 0         | 1         | 1         |
| CNAG_00092        | chr1        | 256069        | 256590        | 521         | null        | mitochondrial protein                                        | 0         | 3         | 0         | 3         |
| <b>CNAG_00093</b> | <b>chr1</b> | <b>256916</b> | <b>259695</b> | <b>2779</b> | <b>null</b> | <b>hypothetical protein CNAG_00093</b>                       | <b>8</b>  | <b>74</b> | <b>9</b>  | <b>91</b> |
| <b>CNAG_00094</b> | <b>chr1</b> | <b>261285</b> | <b>262588</b> | <b>1303</b> | <b>null</b> | <b>NAD-dependent epimerase/dehydratase</b>                   | <b>1</b>  | <b>15</b> | <b>16</b> | <b>32</b> |
| <b>CNAG_00095</b> | <b>chr1</b> | <b>262739</b> | <b>266546</b> | <b>3807</b> | <b>null</b> | <b>hypothetical protein CNAG_00095</b>                       | <b>5</b>  | <b>0</b>  | <b>9</b>  | <b>14</b> |
| CNAG_00096        | chr1        | 266961        | 268587        | 1626        | null        | hypothetical protein CNAG_00096                              | 2         | 2         | 2         | 6         |
| CNAG_00098        | chr1        | 273829        | 275038        | 1209        | null        | palmitoyl-protein thioesterase                               | 0         | 0         | 1         | 1         |
| CNAG_00099        | chr1        | 275157        | 278008        | 2851        | null        | minichromosome maintenance protein 3                         | 0         | 1         | 1         | 2         |
| CNAG_00101        | chr1        | 280893        | 281839        | 946         | null        | hypothetical protein CNAG_00101                              | 0         | 1         | 0         | 1         |
| CNAG_00104        | chr1        | 285901        | 289440        | 3539        | null        | elongation factor 3                                          | 0         | 0         | 1         | 1         |
| CNAG_00105        | chr1        | 289772        | 291138        | 1366        | null        | pyridoxal reductase                                          | 1         | 2         | 0         | 3         |
| CNAG_00106        | chr1        | 292159        | 296404        | 4245        | TCO5        | two-component system sensor protein                          | 1         | 1         | 0         | 2         |
| CNAG_07312        | chr1        | 309264        | 312058        | 2794        | null        | hypothetical protein CNAG_07312                              | 1         | 0         | 0         | 1         |
| CNAG_00117        | chr1        | 316825        | 318851        | 2026        | ERG24       | delta14-sterol reductase                                     | 2         | 0         | 2         | 4         |
| CNAG_00119        | chr1        | 319922        | 320592        | 670         | null        | hypothetical protein CNAG_00119                              | 0         | 0         | 1         | 1         |
| CNAG_00122        | chr1        | 324829        | 326898        | 2069        | null        | alpha-amylase                                                | 0         | 1         | 2         | 3         |
| CNAG_00127        | chr1        | 341632        | 343375        | 1743        | null        | hypothetical protein CNAG_00127                              | 0         | 1         | 0         | 1         |
| CNAG_00132        | chr1        | 360605        | 362888        | 2283        | null        | hypothetical protein CNAG_00132                              | 0         | 3         | 0         | 3         |
| CNAG_00133        | chr1        | 364008        | 364781        | 773         | null        | hypothetical protein CNAG_00133                              | 0         | 1         | 0         | 1         |
| CNAG_00136        | chr1        | 368615        | 372320        | 3705        | null        | ubiquitin-activating enzyme E1                               | 0         | 1         | 0         | 1         |
| CNAG_00137        | chr1        | 372877        | 374191        | 1314        | null        | hypothetical protein CNAG_00137                              | 1         | 0         | 0         | 1         |
| CNAG_00140        | chr1        | 379229        | 380739        | 1510        | null        | U1 small nuclear ribonucleoprotein 70kDa                     | 0         | 1         | 0         | 1         |
| CNAG_00142        | chr1        | 383256        | 385933        | 2677        | null        | hypothetical protein CNAG_00142                              | 2         | 0         | 0         | 2         |
| CNAG_00143        | chr1        | 386986        | 389134        | 2148        | null        | phosphoribosylaminoimidazolesuccinocarboxamide synthase      | 1         | 0         | 0         | 1         |
| CNAG_00144        | chr1        | 389309        | 390317        | 1008        | null        | hypothetical protein CNAG_00144                              | 0         | 0         | 1         | 1         |

|                   |             |               |               |             |             |                                                  |          |           |          |           |
|-------------------|-------------|---------------|---------------|-------------|-------------|--------------------------------------------------|----------|-----------|----------|-----------|
| CNAG_00150        | chr1        | 411943        | 415150        | 3207        | null        | peptidase                                        | 1        | 1         | 1        | 3         |
| CNAG_00151        | chr1        | 415523        | 418296        | 2773        | null        | transcription elongation regulator 1             | 4        | 0         | 3        | 7         |
| CNAG_00152        | chr1        | 418482        | 420087        | 1605        | null        | hypothetical protein CNAG_00152                  | 1        | 1         | 0        | 2         |
| CNAG_00154        | chr1        | 422287        | 424170        | 1883        | null        | oxidoreductase                                   | 2        | 0         | 0        | 2         |
| CNAG_00156        | chr1        | 427608        | 431302        | 3694        | SP1         | hypothetical protein CNAG_00156                  | 0        | 1         | 0        | 1         |
| CNAG_00158        | chr1        | 433036        | 435353        | 2317        | null        | glycosyltransferase                              | 0        | 2         | 0        | 2         |
| CNAG_00159        | chr1        | 435868        | 436123        | 255         | null        | hypothetical protein CNAG_00159                  | 0        | 1         | 0        | 1         |
| CNAG_00160        | chr1        | 436421        | 437840        | 1419        | null        | hypothetical protein CNAG_00160                  | 0        | 0         | 1        | 1         |
| CNAG_00161        | chr1        | 437991        | 439360        | 1369        | null        | auxin-induced protein                            | 0        | 1         | 1        | 2         |
| CNAG_00162        | chr1        | 439854        | 441268        | 1414        | AOX1        | alternative oxidase, mitochondrial               | 0        | 0         | 1        | 1         |
| CNAG_00163        | chr1        | 442897        | 446300        | 3403        | null        | general transcription factor 3C polypeptide 4    | 3        | 3         | 0        | 6         |
| <b>CNAG_00164</b> | <b>chr1</b> | <b>447026</b> | <b>448723</b> | <b>1697</b> | <b>null</b> | <b>hypothetical protein CNAG_00164</b>           | <b>0</b> | <b>24</b> | <b>1</b> | <b>25</b> |
| CNAG_00165        | chr1        | 450185        | 451450        | 1265        | null        | methylthioadenosine phosphorylase                | 0        | 2         | 1        | 3         |
| CNAG_00166        | chr1        | 452494        | 454578        | 2084        | null        | ATP-dependent RNA helicase DBP8                  | 2        | 1         | 2        | 5         |
| CNAG_00167        | chr1        | 454912        | 457078        | 2166        | null        | hypothetical protein CNAG_00167                  | 2        | 1         | 4        | 7         |
| CNAG_07315        | chr1        | 459955        | 462704        | 2749        | LIV6        | hypothetical protein CNAG_07315                  | 0        | 0         | 1        | 1         |
| CNAG_00171        | chr1        | 463029        | 464438        | 1409        | null        | peroxin-2                                        | 1        | 0         | 1        | 2         |
| CNAG_00175        | chr1        | 474659        | 476107        | 1448        | null        | hypothetical protein CNAG_00175                  | 2        | 0         | 4        | 6         |
| CNAG_00178        | chr1        | 481142        | 485162        | 4020        | null        | DNA repair protein REV1                          | 0        | 1         | 1        | 2         |
| CNAG_00179        | chr1        | 488572        | 489943        | 1371        | GPA2        | guanine nucleotide-binding protein subunit alpha | 0        | 1         | 0        | 1         |
| CNAG_00181        | chr1        | 491751        | 493761        | 2010        | FYV10       | macrophage erythroblast attacher isoform 1       | 1        | 0         | 0        | 1         |
| CNAG_00183        | chr1        | 497481        | 498775        | 1294        | null        | alternative cyclin Pcl12                         | 0        | 2         | 0        | 2         |
| CNAG_00187        | chr1        | 507083        | 509382        | 2299        | UBP16       | ubiquitin carboxyl-terminal hydrolase 1          | 0        | 0         | 1        | 1         |
| CNAG_00188        | chr1        | 509423        | 510478        | 1055        | null        | endoplasmic reticulum protein                    | 0        | 0         | 1        | 1         |
| CNAG_00190        | chr1        | 512338        | 514159        | 1821        | null        | hypothetical protein CNAG_00190                  | 0        | 2         | 0        | 2         |
| CNAG_00192        | chr1        | 517793        | 521395        | 3602        | null        | hypothetical protein CNAG_00192                  | 0        | 2         | 0        | 2         |
| CNAG_07321        | chr1        | 545312        | 548518        | 3206        | null        | hypothetical protein CNAG_07321                  | 1        | 0         | 0        | 1         |
| CNAG_07323        | chr1        | 551679        | 554213        | 2534        | null        | cactin                                           | 1        | 0         | 0        | 1         |
| CNAG_07332        | chr1        | 572025        | 574718        | 2693        | null        | hypothetical protein CNAG_07332                  | 0        | 1         | 0        | 1         |
| CNAG_07333        | chr1        | 575093        | 580250        | 5157        | null        | ubiquitin carboxyl-terminal hydrolase 25/28      | 0        | 0         | 1        | 1         |
| CNAG_07027        | chr1        | 593866        | 595294        | 1428        | null        | protein SPT2                                     | 0        | 0         | 1        | 1         |
| CNAG_07340        | chr1        | 599292        | 599678        | 386         | null        | hypothetical protein CNAG_07340                  | 0        | 1         | 0        | 1         |
| CNAG_00234        | chr1        | 613927        | 615256        | 1329        | null        | tRNA-dihydrouridine synthase 4                   | 0        | 0         | 1        | 1         |
| CNAG_00235        | chr1        | 615351        | 617537        | 2186        | AMT1        | amt family ammonium transporter                  | 0        | 1         | 0        | 1         |
| CNAG_00239        | chr1        | 628128        | 630490        | 2362        | null        | hypothetical protein CNAG_00239                  | 0        | 1         | 0        | 1         |
| CNAG_00240        | chr1        | 630798        | 634045        | 3247        | null        | hypothetical protein CNAG_00240                  | 0        | 1         | 0        | 1         |
| CNAG_07344        | chr1        | 642832        | 646263        | 3431        | null        | ras guanyl-nucleotide exchange factor            | 0        | 1         | 0        | 1         |
| CNAG_00255        | chr1        | 667625        | 668043        | 418         | null        | hypothetical protein CNAG_00255                  | 0        | 1         | 0        | 1         |
| CNAG_00257        | chr1        | 669541        | 675329        | 5788        | null        | kinesin family member 21A                        | 1        | 1         | 2        | 4         |
| CNAG_00258        | chr1        | 676394        | 680311        | 3917        | null        | hypothetical protein CNAG_00258                  | 0        | 0         | 1        | 1         |
| CNAG_00263        | chr1        | 689599        | 690700        | 1101        | null        | serine/threonine/tyrosine-interacting protein    | 0        | 1         | 0        | 1         |
| CNAG_00267        | chr1        | 696435        | 698233        | 1798        | null        | hypothetical protein CNAG_00267                  | 0        | 0         | 1        | 1         |
| CNAG_00276        | chr1        | 717809        | 718990        | 1181        | null        | hypothetical protein CNAG_00276                  | 1        | 0         | 0        | 1         |
| CNAG_00288        | chr1        | 745984        | 746917        | 933         | null        | oligoribonuclease                                | 0        | 1         | 0        | 1         |
| CNAG_07349        | chr1        | 765989        | 767223        | 1234        | null        | hypothetical protein CNAG_07349                  | 1        | 0         | 0        | 1         |
| CNAG_00300        | chr1        | 772002        | 775338        | 3336        | null        | gamma-tubulin complex component 2                | 0        | 0         | 1        | 1         |
| CNAG_00308        | chr1        | 790860        | 792851        | 1991        | null        | gly-X carboxypeptidase                           | 0        | 0         | 1        | 1         |

|            |      |         |         |      |      |                                                           |   |   |   |   |
|------------|------|---------|---------|------|------|-----------------------------------------------------------|---|---|---|---|
| CNAG_00313 | chr1 | 803371  | 806503  | 3132 | null | hypothetical protein CNAG_00313                           | 1 | 0 | 0 | 1 |
| CNAG_00326 | chr1 | 833626  | 835621  | 1995 | null | hypothetical protein CNAG_00326                           | 0 | 1 | 0 | 1 |
| CNAG_00330 | chr1 | 843583  | 845386  | 1803 | null | transcription factor TFIIIB component b\''                | 1 | 0 | 0 | 1 |
| CNAG_00332 | chr1 | 848559  | 852220  | 3661 | null | hypothetical protein CNAG_00332                           | 0 | 1 | 1 | 2 |
| CNAG_00335 | chr1 | 860082  | 861484  | 1402 | null | hypothetical protein CNAG_00335                           | 0 | 1 | 0 | 1 |
| CNAG_00337 | chr1 | 865584  | 868458  | 2874 | null | hypothetical protein CNAG_00337                           | 0 | 0 | 1 | 1 |
| CNAG_07352 | chr1 | 869003  | 870059  | 1056 | null | hypothetical protein CNAG_07352                           | 0 | 0 | 1 | 1 |
| CNAG_07353 | chr1 | 870118  | 871091  | 973  | null | 26S proteasome non-ATPase regulatory subunit 9            | 0 | 1 | 0 | 1 |
| CNAG_00342 | chr1 | 874981  | 877529  | 2548 | null | hypothetical protein CNAG_00342                           | 0 | 0 | 1 | 1 |
| CNAG_00343 | chr1 | 877920  | 879310  | 1390 | null | hypothetical protein CNAG_00343                           | 0 | 1 | 0 | 1 |
| CNAG_00347 | chr1 | 886207  | 891417  | 5210 | null | DEAH box polypeptide 36                                   | 1 | 0 | 2 | 3 |
| CNAG_07356 | chr1 | 895486  | 896310  | 824  | null | succinate dehydrogenase, cytochrome b556 subunit          | 1 | 0 | 0 | 1 |
| CNAG_07253 | chr1 | 896521  | 897474  | 953  | null | hypothetical protein CNAG_07253                           | 0 | 0 | 1 | 1 |
| CNAG_00364 | chr1 | 928880  | 930286  | 1406 | null | tRNA threonylcarbamoyladenine biosynthesis protein        | 0 | 0 | 1 | 1 |
| CNAG_00374 | chr1 | 951148  | 953086  | 1938 | null | hypothetical protein CNAG_00374                           | 0 | 0 | 1 | 1 |
| CNAG_00377 | chr1 | 960400  | 965385  | 4985 | null | DNA topoisomerase II                                      | 0 | 4 | 0 | 4 |
| CNAG_07950 | chr1 | 976947  | 977798  | 851  | null | hypothetical protein CNAG_07950                           | 0 | 3 | 0 | 3 |
| CNAG_07358 | chr1 | 1004400 | 1005094 | 694  | null | hypothetical protein CNAG_07358                           | 0 | 2 | 0 | 2 |
| CNAG_00387 | chr1 | 1019438 | 1021867 | 2429 | null | hypothetical protein CNAG_00387                           | 0 | 0 | 1 | 1 |
| CNAG_00388 | chr1 | 1022092 | 1024835 | 2743 | null | 1-phosphatidylinositol-4-phosphate 5-kinase               | 1 | 3 | 0 | 4 |
| CNAG_07951 | chr1 | 1026293 | 1027739 | 1446 | null | WD-repeat protein JIP5                                    | 0 | 0 | 1 | 1 |
| CNAG_00391 | chr1 | 1030456 | 1031601 | 1145 | null | hypothetical protein CNAG_00391                           | 0 | 2 | 0 | 2 |
| CNAG_00392 | chr1 | 1031778 | 1033485 | 1707 | null | kelch repeat-containing protein                           | 1 | 0 | 0 | 1 |
| CNAG_00393 | chr1 | 1033937 | 1036850 | 2913 | null | 1,4-alpha-glucan-branching enzyme                         | 1 | 2 | 0 | 3 |
| CNAG_00394 | chr1 | 1037392 | 1037911 | 519  | null | diphthamide biosynthesis protein 3                        | 0 | 1 | 0 | 1 |
| CNAG_00395 | chr1 | 1038038 | 1039781 | 1743 | null | structure-specific endonuclease subunit SLX1              | 3 | 2 | 0 | 5 |
| CNAG_00396 | chr1 | 1040370 | 1042329 | 1959 | PKA1 | AGC/PKA protein kinase                                    | 0 | 1 | 0 | 1 |
| CNAG_00397 | chr1 | 1043270 | 1045035 | 1765 | null | 2-oxoisovalerate dehydrogenase E1 component, beta subunit | 0 | 0 | 1 | 1 |
| CNAG_00398 | chr1 | 1045238 | 1046318 | 1080 | null | hypothetical protein CNAG_00398                           | 0 | 2 | 0 | 2 |
| CNAG_00399 | chr1 | 1047225 | 1048849 | 1624 | null | transformer-2-beta isoform 3                              | 1 | 0 | 0 | 1 |
| CNAG_00400 | chr1 | 1050472 | 1051379 | 907  | null | secondary thiamine-phosphate synthase enzyme              | 0 | 0 | 1 | 1 |
| CNAG_00401 | chr1 | 1051433 | 1053159 | 1726 | null | phosphatidylinositol glycan, class U                      | 0 | 0 | 1 | 1 |
| CNAG_00402 | chr1 | 1053739 | 1058486 | 4747 | null | translation initiation factor 4G                          | 1 | 0 | 1 | 2 |
| CNAG_00403 | chr1 | 1059161 | 1060952 | 1791 | null | mitochondrial protein                                     | 1 | 0 | 2 | 3 |
| CNAG_00404 | chr1 | 1061805 | 1063875 | 2070 | null | RING zinc finger protein                                  | 0 | 1 | 1 | 2 |
| CNAG_00405 | chr1 | 1064036 | 1067169 | 3133 | KIC1 | STE/STE20/YSK protein kinase                              | 2 | 0 | 3 | 5 |
| CNAG_00406 | chr1 | 1067315 | 1070103 | 2788 | null | hypothetical protein CNAG_00406                           | 1 | 1 | 0 | 2 |
| CNAG_00407 | chr1 | 1071048 | 1073410 | 2362 | null | glyoxal oxidase                                           | 1 | 0 | 0 | 1 |
| CNAG_00409 | chr1 | 1076718 | 1077969 | 1251 | null | hypothetical protein CNAG_00409                           | 0 | 1 | 0 | 1 |
| CNAG_00410 | chr1 | 1078249 | 1081100 | 2851 | null | hypothetical protein CNAG_00410                           | 0 | 3 | 0 | 3 |
| CNAG_00413 | chr1 | 1085131 | 1087389 | 2258 | OFD1 | nuclear protein                                           | 0 | 2 | 0 | 2 |
| CNAG_00417 | chr1 | 1094549 | 1096292 | 1743 | null | elongation factor 1-gamma                                 | 0 | 1 | 0 | 1 |
| CNAG_00421 | chr1 | 1102100 | 1102999 | 899  | null | charged multivesicular body protein 3                     | 0 | 1 | 0 | 1 |
| CNAG_00422 | chr1 | 1103304 | 1107204 | 3900 | null | hypothetical protein CNAG_00422                           | 1 | 0 | 0 | 1 |
| CNAG_00423 | chr1 | 1108125 | 1109003 | 878  | null | kinetochore protein Spc24, fungi type                     | 0 | 1 | 0 | 1 |
| CNAG_00425 | chr1 | 1111224 | 1112489 | 1265 | null | hypothetical protein CNAG_00425                           | 0 | 0 | 1 | 1 |
| CNAG_00426 | chr1 | 1112743 | 1115306 | 2563 | null | UBA/TS-N domain-containing protein                        | 0 | 1 | 0 | 1 |

|            |      |         |         |      |       |                                                      |   |   |   |   |
|------------|------|---------|---------|------|-------|------------------------------------------------------|---|---|---|---|
| CNAG_00466 | chr1 | 1209299 | 1210069 | 770  | null  | adaptin ear-binding coat-associated protein 2        | 0 | 1 | 0 | 1 |
| CNAG_00474 | chr1 | 1220031 | 1221105 | 1074 | null  | hypothetical protein CNAG_00474                      | 1 | 0 | 0 | 1 |
| CNAG_00482 | chr1 | 1241052 | 1242310 | 1258 | null  | 26S proteasome regulatory subunit N10                | 0 | 1 | 0 | 1 |
| CNAG_00504 | chr1 | 1287972 | 1289624 | 1652 | null  | peptidyl-prolyl cis-trans isomerase-like 4           | 0 | 0 | 1 | 1 |
| CNAG_00509 | chr1 | 1300209 | 1301823 | 1614 | null  | translation initiation factor 3 subunit M            | 0 | 1 | 1 | 2 |
| CNAG_00512 | chr1 | 1305539 | 1307282 | 1743 | null  | mitochondrial carrier protein                        | 0 | 0 | 1 | 1 |
| CNAG_00520 | chr1 | 1325020 | 1330280 | 5260 | null  | hypothetical protein CNAG_00520                      | 0 | 2 | 0 | 2 |
| CNAG_00522 | chr1 | 1333192 | 1336895 | 3703 | null  | C2 domain-containing protein                         | 2 | 0 | 1 | 3 |
| CNAG_00527 | chr1 | 1345836 | 1348215 | 2379 | null  | translation initiation factor eIF-2B subunit epsilon | 1 | 0 | 0 | 1 |
| CNAG_00535 | chr1 | 1365312 | 1366288 | 976  | null  | large subunit ribosomal protein L16                  | 1 | 0 | 0 | 1 |
| CNAG_00536 | chr1 | 1366906 | 1367539 | 633  | null  | hypothetical protein CNAG_00536                      | 0 | 1 | 0 | 1 |
| CNAG_00539 | chr1 | 1372146 | 1374367 | 2221 | null  | membrane transporter                                 | 1 | 2 | 0 | 3 |
| CNAG_00541 | chr1 | 1380548 | 1382373 | 1825 | null  | dimethylaniline monooxygenase                        | 0 | 1 | 1 | 2 |
| CNAG_00542 | chr1 | 1383091 | 1384908 | 1817 | null  | salicylate hydroxylase                               | 1 | 0 | 0 | 1 |
| CNAG_00543 | chr1 | 1385674 | 1386516 | 842  | null  | hypothetical protein CNAG_00543                      | 0 | 0 | 1 | 1 |
| CNAG_00544 | chr1 | 1386636 | 1388404 | 1768 | null  | hypothetical protein CNAG_00544                      | 0 | 1 | 0 | 1 |
| CNAG_00545 | chr1 | 1389395 | 1396434 | 7039 | null  | cohesin loading factor subunit SCC2                  | 0 | 0 | 1 | 1 |
| CNAG_00546 | chr1 | 1397884 | 1402238 | 4354 | CHS4  | chitin synthase                                      | 1 | 0 | 0 | 1 |
| CNAG_00547 | chr1 | 1402747 | 1406925 | 4178 | null  | hypothetical protein CNAG_00547                      | 2 | 0 | 1 | 3 |
| CNAG_00550 | chr1 | 1414393 | 1417894 | 3501 | null  | DNA mismatch repair protein MSH5                     | 0 | 1 | 0 | 1 |
| CNAG_00551 | chr1 | 1418394 | 1420854 | 2460 | null  | poly(A) polymerase                                   | 0 | 3 | 0 | 3 |
| CNAG_07367 | chr1 | 1422312 | 1424374 | 2062 | null  | amino acid transporter                               | 0 | 1 | 1 | 2 |
| CNAG_00556 | chr1 | 1434372 | 1436338 | 1966 | CCK1  | CK1/CK1/CK1-G protein kinase                         | 0 | 0 | 1 | 1 |
| CNAG_00559 | chr1 | 1444617 | 1445704 | 1087 | null  | hypothetical protein CNAG_00559                      | 1 | 0 | 1 | 2 |
| CNAG_00560 | chr1 | 1446174 | 1447237 | 1063 | null  | V-type H <sup>-</sup> -transporting ATPase subunit E | 1 | 1 | 0 | 2 |
| CNAG_00563 | chr1 | 1451540 | 1452544 | 1004 | null  | hypothetical protein CNAG_00563                      | 1 | 0 | 0 | 1 |
| CNAG_00564 | chr1 | 1453599 | 1455614 | 2015 | null  | hypothetical protein CNAG_00564                      | 0 | 1 | 0 | 1 |
| CNAG_00567 | chr1 | 1462858 | 1464368 | 1510 | null  | WD40 repeat protein                                  | 0 | 1 | 0 | 1 |
| CNAG_00570 | chr1 | 1468943 | 1470619 | 1676 | PKR1  | cAMP-dependent protein kinase regulator              | 0 | 0 | 1 | 1 |
| CNAG_00571 | chr1 | 1470961 | 1473455 | 2494 | null  | hypothetical protein CNAG_00571                      | 0 | 1 | 0 | 1 |
| CNAG_00574 | chr1 | 1479373 | 1482187 | 2814 | null  | amino acid/metabolite permease                       | 0 | 7 | 0 | 7 |
| CNAG_00575 | chr1 | 1483468 | 1486076 | 2608 | CAT3  | catalase                                             | 0 | 1 | 1 | 2 |
| CNAG_07369 | chr1 | 1490766 | 1491948 | 1182 | null  | hypothetical protein CNAG_07369                      | 1 | 0 | 1 | 2 |
| CNAG_00580 | chr1 | 1492251 | 1495182 | 2931 | null  | translation initiation factor IF-2                   | 1 | 2 | 0 | 3 |
| CNAG_00582 | chr1 | 1498614 | 1499574 | 960  | null  | vacuolar transporter chaperone 1                     | 0 | 1 | 0 | 1 |
| CNAG_00583 | chr1 | 1500279 | 1503651 | 3372 | null  | hypothetical protein CNAG_00583                      | 1 | 0 | 0 | 1 |
| CNAG_00585 | chr1 | 1506247 | 1507297 | 1050 | null  | hypothetical protein CNAG_00585                      | 0 | 1 | 0 | 1 |
| CNAG_00586 | chr1 | 1507859 | 1508397 | 538  | null  | hypothetical protein CNAG_00586                      | 1 | 1 | 0 | 2 |
| CNAG_00587 | chr1 | 1508885 | 1509614 | 729  | null  | hypothetical protein CNAG_00587                      | 0 | 4 | 0 | 4 |
| CNAG_00588 | chr1 | 1511997 | 1512725 | 728  | null  | hypothetical protein CNAG_00588                      | 0 | 1 | 0 | 1 |
| CNAG_00591 | chr1 | 1521073 | 1522449 | 1376 | null  | hypothetical protein CNAG_00591                      | 1 | 0 | 0 | 1 |
| CNAG_00593 | chr1 | 1524145 | 1525500 | 1355 | null  | hypothetical protein CNAG_00593                      | 1 | 1 | 0 | 2 |
| CNAG_00594 | chr1 | 1525900 | 1528108 | 2208 | null  | lipid particle protein                               | 0 | 1 | 0 | 1 |
| CNAG_00595 | chr1 | 1529446 | 1530958 | 1512 | null  | hypothetical protein CNAG_00595                      | 1 | 0 | 0 | 1 |
| CNAG_00597 | chr1 | 1534561 | 1536623 | 2062 | DIP5  | amino acid transporter                               | 0 | 0 | 1 | 1 |
| CNAG_00598 | chr1 | 1538820 | 1540760 | 1940 | null  | nicotinamide mononucleotide permease                 | 0 | 1 | 0 | 1 |
| CNAG_00600 | chr1 | 1544357 | 1546235 | 1878 | CAP60 | capsular associated protein                          | 0 | 1 | 0 | 1 |

|                   |             |                |                |             |             |                                                                                           |           |          |          |           |
|-------------------|-------------|----------------|----------------|-------------|-------------|-------------------------------------------------------------------------------------------|-----------|----------|----------|-----------|
| CNAG_00601        | chr1        | 1546728        | 1548198        | 1470        | CEL1        | glycosyl hydrolase                                                                        | 0         | 1        | 0        | 1         |
| CNAG_00603        | chr1        | 1550413        | 1551496        | 1083        | null        | pre-rRNA-processing protein PNO1                                                          | 1         | 0        | 0        | 1         |
| CNAG_00604        | chr1        | 1551879        | 1553792        | 1913        | null        | hypothetical protein CNAG_00604                                                           | 0         | 1        | 0        | 1         |
| CNAG_00606        | chr1        | 1557138        | 1559655        | 2517        | null        | transcription initiation factor TFIID subunit 7                                           | 1         | 0        | 0        | 1         |
| CNAG_00607        | chr1        | 1559765        | 1561587        | 1822        | null        | hypothetical protein CNAG_00607                                                           | 0         | 1        | 0        | 1         |
| CNAG_00609        | chr1        | 1562694        | 1566500        | 3806        | null        | hypothetical protein CNAG_00609                                                           | 0         | 1        | 0        | 1         |
| CNAG_07956        | chr1        | 1569339        | 1571912        | 2573        | null        | WD repeat and SOF domain-containing protein 1                                             | 0         | 1        | 1        | 2         |
| CNAG_00613        | chr1        | 1577213        | 1578041        | 828         | FCY1        | cytosine deaminase                                                                        | 0         | 1        | 0        | 1         |
| CNAG_00619        | chr1        | 1582928        | 1584456        | 1528        | null        | tubulin folding cofactor C                                                                | 0         | 0        | 1        | 1         |
| CNAG_07373        | chr1        | 1584888        | 1592226        | 7338        | null        | carbamoyl-phosphate synthase, large subunit                                               | 1         | 1        | 1        | 3         |
| CNAG_00622        | chr1        | 1594084        | 1595573        | 1489        | ARG8        | acetylornithine aminotransferase                                                          | 1         | 0        | 1        | 2         |
| CNAG_00623        | chr1        | 1595674        | 1598729        | 3055        | EGCrP1      | cytoplasmic protein                                                                       | 0         | 0        | 1        | 1         |
| CNAG_00625        | chr1        | 1600864        | 1606646        | 5782        | null        | ARF guanyl-nucleotide exchange factor                                                     | 0         | 0        | 2        | 2         |
| CNAG_00627        | chr1        | 1609523        | 1611827        | 2304        | null        | specific transcriptional repressor                                                        | 1         | 0        | 0        | 1         |
| CNAG_07375        | chr1        | 1612961        | 1617276        | 4315        | null        | guanyl-nucleotide exchange factor                                                         | 1         | 0        | 0        | 1         |
| CNAG_07377        | chr1        | 1620412        | 1632337        | 11925       | TRA1        | transformation/transcription domain-associated protein                                    | 0         | 1        | 1        | 2         |
| CNAG_00632        | chr1        | 1632780        | 1633611        | 831         | null        | hypothetical protein CNAG_00632                                                           | 1         | 0        | 0        | 1         |
| CNAG_00633        | chr1        | 1633888        | 1638454        | 4566        | null        | hypothetical protein CNAG_00633                                                           | 1         | 0        | 0        | 1         |
| CNAG_00635        | chr1        | 1641789        | 1646163        | 4374        | null        | cytoplasmic protein                                                                       | 1         | 0        | 1        | 2         |
| CNAG_00640        | chr1        | 1656588        | 1657697        | 1109        | null        | small subunit ribosomal protein S4-A                                                      | 0         | 1        | 0        | 1         |
| CNAG_00641        | chr1        | 1658271        | 1662312        | 4041        | null        | transcription elongation factor SPT5                                                      | 0         | 0        | 1        | 1         |
| CNAG_00642        | chr1        | 1664119        | 1675519        | 11400       | null        | hypothetical protein CNAG_00642                                                           | 1         | 1        | 0        | 2         |
| CNAG_00643        | chr1        | 1675864        | 1678772        | 2908        | null        | hypothetical protein CNAG_00643                                                           | 1         | 0        | 1        | 2         |
| CNAG_00644        | chr1        | 1679062        | 1680485        | 1423        | null        | sphingolipid delta-4 desaturase                                                           | 1         | 0        | 1        | 2         |
| CNAG_07959        | chr1        | 1682371        | 1685547        | 3176        | null        | hypothetical protein CNAG_07959                                                           | 1         | 0        | 1        | 2         |
| CNAG_00647        | chr1        | 1685760        | 1686256        | 496         | null        | hypothetical protein CNAG_00647                                                           | 0         | 1        | 0        | 1         |
| CNAG_00649        | chr1        | 1688094        | 1690677        | 2583        | null        | tryptophan synthase, beta subunit                                                         | 0         | 3        | 0        | 3         |
| CNAG_00651        | chr1        | 1694356        | 1697782        | 3426        | null        | ATP-binding cassette, subfamily D (ALD), peroxisomal long-chain fatty acid import protein | 0         | 0        | 2        | 2         |
| CNAG_00653        | chr1        | 1701095        | 1704056        | 2961        | null        | hypothetical protein CNAG_00653                                                           | 0         | 3        | 0        | 3         |
| CNAG_00654        | chr1        | 1705239        | 1705730        | 491         | SRX1        | sulfiredoxin                                                                              | 0         | 1        | 0        | 1         |
| CNAG_00657        | chr1        | 1708978        | 1709762        | 784         | null        | hypothetical protein CNAG_00657                                                           | 0         | 0        | 0        | 0         |
| CNAG_00658        | chr1        | 1710449        | 1712659        | 2210        | null        | hypothetical protein CNAG_00658                                                           | 0         | 1        | 0        | 1         |
| CNAG_00660        | chr1        | 1713340        | 1716027        | 2687        | null        | histone deacetylase HOS3                                                                  | 1         | 0        | 0        | 1         |
| CNAG_00662        | chr1        | 1718893        | 1720152        | 1259        | null        | carboxymethylenebutenolidase                                                              | 0         | 4        | 0        | 4         |
| CNAG_00663        | chr1        | 1720880        | 1722400        | 1520        | null        | hypothetical protein CNAG_00663                                                           | 0         | 0        | 2        | 2         |
| <b>CNAG_00664</b> | <b>chr1</b> | <b>1723252</b> | <b>1725606</b> | <b>2354</b> | <b>null</b> | <b>hypothetical protein CNAG_00664</b>                                                    | <b>19</b> | <b>0</b> | <b>9</b> | <b>28</b> |
| CNAG_00665        | chr1        | 1725974        | 1728798        | 2824        | null        | DNA topoisomerase 2-associated protein PAT1                                               | 0         | 3        | 2        | 5         |
| CNAG_00666        | chr1        | 1729589        | 1734337        | 4748        | null        | nucleoporin nsp1                                                                          | 2         | 0        | 0        | 2         |
| CNAG_00667        | chr1        | 1734797        | 1736980        | 2183        | null        | hypothetical protein CNAG_00667                                                           | 1         | 0        | 0        | 1         |
| CNAG_00669        | chr1        | 1740515        | 1741269        | 754         | null        | hypothetical protein CNAG_00669                                                           | 1         | 1        | 0        | 2         |
| CNAG_00671        | chr1        | 1743982        | 1746660        | 2678        | null        | cytoplasmic protein                                                                       | 1         | 1        | 0        | 2         |
| CNAG_00674        | chr1        | 1750408        | 1752237        | 1829        | null        | hypothetical protein CNAG_00674                                                           | 1         | 0        | 0        | 1         |
| CNAG_00678        | chr1        | 1762205        | 1763515        | 1310        | URE7        | urease accessory protein UreG                                                             | 0         | 1        | 0        | 1         |
| CNAG_00682        | chr1        | 1772139        | 1778248        | 6109        | null        | kinesin                                                                                   | 1         | 0        | 0        | 1         |
| CNAG_00683        | chr1        | 1779417        | 1782113        | 2696        | null        | CMGC/CLK protein kinase                                                                   | 1         | 0        | 0        | 1         |
| CNAG_00687        | chr1        | 1788072        | 1792772        | 4700        | null        | hypothetical protein CNAG_00687                                                           | 2         | 0        | 0        | 2         |
| CNAG_00688        | chr1        | 1792919        | 1793738        | 819         | null        | hypothetical protein CNAG_00688                                                           | 0         | 1        | 0        | 1         |

|            |      |         |         |      |      |                                                           |   |   |   |   |
|------------|------|---------|---------|------|------|-----------------------------------------------------------|---|---|---|---|
| CNAG_00696 | chr1 | 1811919 | 1816687 | 4768 | null | alpha-mannosidase                                         | 1 | 0 | 0 | 1 |
| CNAG_00698 | chr1 | 1819918 | 1822366 | 2448 | null | hypothetical protein CNAG_00698                           | 0 | 1 | 0 | 1 |
| CNAG_00699 | chr1 | 1822784 | 1827321 | 4537 | null | transmembrane receptor                                    | 0 | 1 | 0 | 1 |
| CNAG_00703 | chr1 | 1839818 | 1840750 | 932  | null | large subunit ribosomal protein L31e                      | 0 | 1 | 0 | 1 |
| CNAG_00707 | chr1 | 1850044 | 1851083 | 1039 | null | protein SYM1                                              | 0 | 1 | 0 | 1 |
| CNAG_00713 | chr1 | 1862292 | 1863976 | 1684 | null | V-type H -transporting ATPase 54 kDa subunit              | 0 | 0 | 1 | 1 |
| CNAG_00714 | chr1 | 1864230 | 1865426 | 1196 | null | hypothetical protein CNAG_00714                           | 1 | 0 | 0 | 1 |
| CNAG_00715 | chr1 | 1866026 | 1866468 | 442  | null | hypothetical protein CNAG_00715                           | 0 | 2 | 0 | 2 |
| CNAG_00716 | chr1 | 1866813 | 1867660 | 847  | null | cytochrome c                                              | 0 | 1 | 0 | 1 |
| CNAG_00730 | chr1 | 1901529 | 1907595 | 6066 | AFR1 | ATP-binding cassette transporter                          | 1 | 0 | 0 | 1 |
| CNAG_00732 | chr1 | 1909284 | 1910521 | 1237 | null | hypothetical protein CNAG_00732                           | 1 | 1 | 0 | 2 |
| CNAG_00736 | chr1 | 1922249 | 1925599 | 3350 | null | exocyst protein                                           | 1 | 0 | 1 | 2 |
| CNAG_00745 | chr1 | 1953608 | 1957242 | 3634 | HRK1 | HAL protein kinase                                        | 0 | 1 | 0 | 1 |
| CNAG_00748 | chr1 | 1962552 | 1963949 | 1397 | null | hypothetical protein CNAG_00748                           | 1 | 2 | 0 | 3 |
| CNAG_00753 | chr1 | 1974597 | 1977345 | 2748 | null | hypothetical protein CNAG_00753                           | 2 | 0 | 0 | 2 |
| CNAG_00754 | chr1 | 1977648 | 1979859 | 2211 | null | ATP-binding cassette, sub-family E, member 1              | 0 | 2 | 0 | 2 |
| CNAG_00757 | chr1 | 1984123 | 1988735 | 4612 | DOA4 | ubiquitin carboxyl-terminal hydrolase 8                   | 0 | 0 | 2 | 2 |
| CNAG_00758 | chr1 | 1991621 | 1995118 | 3497 | null | regulatory protein ral2                                   | 1 | 0 | 0 | 1 |
| CNAG_00759 | chr1 | 1995540 | 1997246 | 1706 | null | hypothetical protein CNAG_00759                           | 1 | 0 | 0 | 1 |
| CNAG_07960 | chr1 | 2003336 | 2005202 | 1866 | null | hypothetical protein CNAG_07960                           | 0 | 1 | 0 | 1 |
| CNAG_00765 | chr1 | 2008525 | 2009452 | 927  | null | hypothetical protein CNAG_00765                           | 1 | 0 | 0 | 1 |
| CNAG_00768 | chr1 | 2016264 | 2017451 | 1187 | null | hypothetical protein CNAG_00768                           | 0 | 2 | 0 | 2 |
| CNAG_00769 | chr1 | 2018003 | 2020204 | 2201 | PBS2 | STE/STE7 protein kinase                                   | 0 | 1 | 0 | 1 |
| CNAG_00770 | chr1 | 2021389 | 2025285 | 3896 | null | DNA mismatch repair protein MSH2                          | 0 | 0 | 1 | 1 |
| CNAG_00774 | chr1 | 2031278 | 2033154 | 1876 | null | phosphoglycerate dehydrogenase                            | 0 | 1 | 0 | 1 |
| CNAG_00775 | chr1 | 2033870 | 2035556 | 1686 | null | U3 small nucleolar RNA-associated protein 15              | 1 | 0 | 0 | 1 |
| CNAG_00777 | chr1 | 2040201 | 2045595 | 5394 | null | CCR4-NOT transcriptional complex subunit CAF120           | 0 | 0 | 1 | 1 |
| CNAG_00782 | chr1 | 2056818 | 2059656 | 2838 | null | STE/STE20/Fray protein kinase                             | 0 | 0 | 1 | 1 |
| CNAG_00783 | chr1 | 2060189 | 2061628 | 1439 | null | hypothetical protein CNAG_00783                           | 0 | 1 | 0 | 1 |
| CNAG_00785 | chr1 | 2063601 | 2065325 | 1724 | null | ATP-dependent RNA helicase eIF4A                          | 1 | 0 | 0 | 1 |
| CNAG_00789 | chr1 | 2076571 | 2077687 | 1116 | null | hypothetical protein CNAG_00789                           | 0 | 1 | 0 | 1 |
| CNAG_00791 | chr1 | 2081273 | 2082633 | 1360 | null | hypothetical protein CNAG_00791                           | 0 | 2 | 0 | 2 |
| CNAG_00792 | chr1 | 2087805 | 2094531 | 6726 | null | ATP-binding cassette transporter                          | 1 | 1 | 0 | 2 |
| CNAG_00793 | chr1 | 2094929 | 2096130 | 1201 | null | DNA-directed RNA polymerase I, II, and III subunit RPABC1 | 0 | 3 | 1 | 4 |
| CNAG_00796 | chr1 | 2101462 | 2106512 | 5050 | MDR1 | ATP-binding cassette, subfamily B (MDR/TAP), member 1     | 0 | 0 | 1 | 1 |
| CNAG_00797 | chr1 | 2108173 | 2110606 | 2433 | null | acetyl-CoA synthetase                                     | 0 | 0 | 1 | 1 |
| CNAG_00800 | chr1 | 2118415 | 2119369 | 954  | null | nicotinamidase                                            | 0 | 2 | 0 | 2 |
| CNAG_00805 | chr1 | 2128994 | 2131387 | 2393 | null | hypothetical protein CNAG_00805                           | 1 | 4 | 0 | 5 |
| CNAG_00806 | chr1 | 2131721 | 2132489 | 768  | null | hypothetical protein CNAG_00806                           | 1 | 0 | 0 | 1 |
| CNAG_00823 | chr1 | 2179310 | 2185060 | 5750 | null | cadmium ion transporter                                   | 1 | 0 | 0 | 1 |
| CNAG_00829 | chr1 | 2200171 | 2201246 | 1075 | null | E3 ubiquitin ligase complex SCF subunit sconC             | 1 | 0 | 0 | 1 |
| CNAG_00849 | chr1 | 2250127 | 2250626 | 499  | null | hypothetical protein CNAG_00849                           | 0 | 1 | 0 | 1 |
| CNAG_00850 | chr1 | 2251267 | 2252869 | 1602 | null | plant-inducible protein                                   | 0 | 1 | 0 | 1 |
| CNAG_00851 | chr1 | 2253124 | 2254143 | 1019 | null | hypothetical protein CNAG_00851                           | 0 | 1 | 0 | 1 |
| CNAG_00853 | chr1 | 2256869 | 2258266 | 1397 | null | exosome complex component RRP43                           | 0 | 0 | 1 | 1 |
| CNAG_00854 | chr1 | 2258878 | 2259890 | 1012 | ERG2 | C-8 sterol isomerase                                      | 0 | 6 | 0 | 6 |
| CNAG_00855 | chr1 | 2260511 | 2263902 | 3391 | null | ligase                                                    | 0 | 0 | 1 | 1 |

|                   |              |               |               |             |             |                                                |          |          |          |           |
|-------------------|--------------|---------------|---------------|-------------|-------------|------------------------------------------------|----------|----------|----------|-----------|
| CNAG_07387        | chr1         | 2264305       | 2266895       | 2590        | null        | siderophore-iron transporter Str3              | 1        | 0        | 1        | 2         |
| CNAG_07837        | chr10        | 13687         | 14776         | 1089        | null        | hypothetical protein CNAG_07837                | 0        | 1        | 0        | 1         |
| CNAG_04921        | chr10        | 19344         | 20694         | 1350        | null        | hypothetical protein CNAG_04921                | 0        | 1        | 0        | 1         |
| CNAG_04916        | chr10        | 33922         | 36215         | 2293        | null        | hypothetical protein CNAG_04916                | 0        | 1        | 0        | 1         |
| CNAG_07840        | chr10        | 48150         | 48428         | 278         | null        | hypothetical protein CNAG_07840                | 0        | 0        | 1        | 1         |
| CNAG_04907        | chr10        | 57169         | 59307         | 2138        | null        | hypothetical protein CNAG_04907                | 1        | 0        | 0        | 1         |
| CNAG_07842        | chr10        | 63703         | 64558         | 855         | null        | hypothetical protein CNAG_07842                | 0        | 1        | 0        | 1         |
| CNAG_04903        | chr10        | 71891         | 72492         | 601         | null        | hypothetical protein CNAG_04903                | 0        | 1        | 0        | 1         |
| CNAG_04899        | chr10        | 79360         | 80687         | 1327        | null        | cytoplasmic protein                            | 0        | 1        | 0        | 1         |
| CNAG_04898        | chr10        | 82310         | 83827         | 1517        | null        | MFS transporter                                | 1        | 0        | 0        | 1         |
| CNAG_04895        | chr10        | 88824         | 92541         | 3717        | null        | nuclear protein                                | 0        | 0        | 1        | 1         |
| CNAG_04894        | chr10        | 93831         | 94256         | 425         | null        | hypothetical protein CNAG_04894                | 0        | 1        | 0        | 1         |
| CNAG_04890        | chr10        | 100361        | 102055        | 1694        | null        | hypothetical protein CNAG_04890                | 0        | 0        | 1        | 1         |
| CNAG_04888        | chr10        | 104754        | 105977        | 1223        | null        | hypothetical protein CNAG_04888                | 1        | 1        | 0        | 2         |
| CNAG_04886        | chr10        | 108075        | 109019        | 944         | null        | hypothetical protein CNAG_04886                | 0        | 1        | 0        | 1         |
| CNAG_04884        | chr10        | 113852        | 114668        | 816         | null        | large subunit ribosomal protein L44            | 0        | 1        | 0        | 1         |
| CNAG_04879        | chr10        | 122775        | 128453        | 5678        | null        | glycogen debranching enzyme                    | 1        | 0        | 1        | 2         |
| CNAG_04878        | chr10        | 129029        | 131157        | 2128        | null        | hypothetical protein CNAG_04878                | 0        | 2        | 0        | 2         |
| CNAG_04875        | chr10        | 137557        | 140485        | 2928        | null        | hypothetical protein CNAG_04875                | 0        | 1        | 0        | 1         |
| CNAG_04873        | chr10        | 145289        | 146998        | 1709        | null        | hypothetical protein CNAG_04873                | 0        | 0        | 1        | 1         |
| CNAG_04872        | chr10        | 147333        | 148843        | 1510        | null        | mitochondrial protein                          | 1        | 1        | 0        | 2         |
| CNAG_04871        | chr10        | 149234        | 150052        | 818         | null        | hypothetical protein CNAG_04871                | 0        | 2        | 0        | 2         |
| <b>CNAG_04870</b> | <b>chr10</b> | <b>150964</b> | <b>153778</b> | <b>2814</b> | <b>null</b> | <b>hypothetical protein CNAG_04870</b>         | <b>7</b> | <b>3</b> | <b>3</b> | <b>13</b> |
| CNAG_04869        | chr10        | 154331        | 157112        | 2781        | PNB1        | carboxylesterase                               | 2        | 6        | 0        | 8         |
| CNAG_04868        | chr10        | 158213        | 160773        | 2560        | null        | cytoplasmic protein                            | 1        | 0        | 0        | 1         |
| CNAG_04867        | chr10        | 161167        | 163144        | 1977        | null        | vacuolar protein                               | 1        | 0        | 0        | 1         |
| CNAG_04865        | chr10        | 167056        | 169308        | 2252        | null        | mannitol dehydrogenase                         | 1        | 0        | 0        | 1         |
| CNAG_04863        | chr10        | 178057        | 179186        | 1129        | VPS25       | ESCRT-II complex subunit VPS25                 | 0        | 0        | 1        | 1         |
| CNAG_04862        | chr10        | 181272        | 188080        | 6808        | null        | glutamate synthase (NADPH/NADH)                | 0        | 1        | 1        | 2         |
| CNAG_04861        | chr10        | 189220        | 190731        | 1511        | null        | transglycosylase SLT domain-containing protein | 1        | 0        | 0        | 1         |
| CNAG_04860        | chr10        | 191111        | 194170        | 3059        | XPT1        | hypothetical protein CNAG_04860                | 1        | 0        | 1        | 2         |
| CNAG_04857        | chr10        | 197373        | 199130        | 1757        | null        | hypothetical protein CNAG_04857                | 1        | 2        | 0        | 3         |
| CNAG_04854        | chr10        | 232071        | 232567        | 496         | null        | hypothetical protein CNAG_04854                | 0        | 3        | 0        | 3         |
| CNAG_04847        | chr10        | 247100        | 248896        | 1796        | null        | hypothetical protein CNAG_04847                | 1        | 0        | 0        | 1         |
| CNAG_04845        | chr10        | 252348        | 253431        | 1083        | null        | mannose-P-dolichol utilization defect 1        | 0        | 1        | 0        | 1         |
| CNAG_04844        | chr10        | 253638        | 254234        | 596         | null        | mitochondrial import receptor subunit tom22    | 0        | 1        | 0        | 1         |
| CNAG_04843        | chr10        | 254647        | 256938        | 2291        | null        | Atypical/ABC1/ABC1-B protein kinase            | 1        | 0        | 0        | 1         |
| CNAG_04842        | chr10        | 257423        | 259285        | 1862        | null        | hypothetical protein CNAG_04842                | 0        | 1        | 0        | 1         |
| CNAG_04841        | chr10        | 261229        | 264729        | 3500        | null        | transcriptional regulatory protein             | 1        | 0        | 0        | 1         |
| CNAG_04838        | chr10        | 268918        | 271617        | 2699        | null        | hypothetical protein CNAG_04838                | 0        | 1        | 0        | 1         |
| CNAG_04837        | chr10        | 272604        | 274410        | 1806        | MLN1        | hypothetical protein CNAG_04837                | 0        | 0        | 1        | 1         |
| CNAG_04836        | chr10        | 276708        | 279401        | 2693        | null        | nuclear protein                                | 1        | 1        | 0        | 2         |
| CNAG_04835        | chr10        | 280893        | 281993        | 1100        | null        | dihydrodipicolinate synthase                   | 0        | 1        | 0        | 1         |
| CNAG_04834        | chr10        | 282587        | 284307        | 1720        | null        | MFS transporter                                | 1        | 0        | 0        | 1         |
| CNAG_04825        | chr10        | 302059        | 303476        | 1417        | null        | hypothetical protein CNAG_04825                | 0        | 1        | 0        | 1         |
| CNAG_04823        | chr10        | 306229        | 307677        | 1448        | null        | peptidyl-prolyl cis-trans isomerase H          | 0        | 1        | 0        | 1         |
| CNAG_07845        | chr10        | 320689        | 321503        | 814         | null        | hypothetical protein CNAG_07845                | 0        | 1        | 1        | 2         |

|            |       |        |        |      |      |                                                              |   |   |   |   |
|------------|-------|--------|--------|------|------|--------------------------------------------------------------|---|---|---|---|
| CNAG_04815 | chr10 | 322938 | 328931 | 5993 | BN11 | cytokinesis protein                                          | 2 | 1 | 0 | 3 |
| CNAG_04813 | chr10 | 329717 | 330845 | 1128 | null | V-type ATPase, C subunit                                     | 0 | 5 | 0 | 5 |
| CNAG_07847 | chr10 | 333491 | 334293 | 802  | null | hypothetical protein CNAG_07847                              | 1 | 6 | 0 | 7 |
| CNAG_04810 | chr10 | 336658 | 336990 | 332  | null | hypothetical protein CNAG_04810                              | 0 | 1 | 2 | 3 |
| CNAG_04809 | chr10 | 337247 | 338850 | 1603 | null | COP9 signalosome complex subunit 5                           | 0 | 0 | 1 | 1 |
| CNAG_04808 | chr10 | 339372 | 342048 | 2676 | null | XPG N-terminal domain-containing protein                     | 0 | 2 | 3 | 5 |
| CNAG_04807 | chr10 | 344828 | 346024 | 1196 | null | hypothetical protein CNAG_04807                              | 0 | 2 | 0 | 2 |
| CNAG_04805 | chr10 | 349871 | 351948 | 2077 | null | peptidyl-prolyl isomerase CWC27                              | 0 | 0 | 1 | 1 |
| CNAG_04804 | chr10 | 352256 | 355441 | 3185 | SRE1 | hypothetical protein CNAG_04804                              | 1 | 0 | 0 | 1 |
| CNAG_04803 | chr10 | 357069 | 361792 | 4723 | null | protein transporter SEC31                                    | 2 | 5 | 0 | 7 |
| CNAG_04801 | chr10 | 364203 | 366424 | 2221 | null | hypothetical protein CNAG_04801                              | 0 | 3 | 0 | 3 |
| CNAG_04796 | chr10 | 376381 | 379013 | 2632 | CNA1 | serine/threonine-protein phosphatase 2B catalytic subunit A1 | 0 | 0 | 1 | 1 |
| CNAG_04794 | chr10 | 381415 | 383533 | 2118 | null | spermine transporter                                         | 0 | 2 | 0 | 2 |
| CNAG_04791 | chr10 | 391294 | 392531 | 1237 | null | hypothetical protein CNAG_04791                              | 0 | 0 | 1 | 1 |
| CNAG_04786 | chr10 | 404760 | 408406 | 3646 | null | hypothetical protein CNAG_04786                              | 0 | 1 | 1 | 2 |
| CNAG_04784 | chr10 | 409609 | 411799 | 2190 | null | monosaccharide transporter                                   | 0 | 1 | 0 | 1 |
| CNAG_04782 | chr10 | 417303 | 420112 | 2809 | null | hypothetical protein CNAG_04782                              | 1 | 0 | 0 | 1 |
| CNAG_04781 | chr10 | 421704 | 423119 | 1415 | null | hypothetical protein CNAG_04781                              | 0 | 1 | 0 | 1 |
| CNAG_07848 | chr10 | 423662 | 426019 | 2357 | null | hypothetical protein CNAG_07848                              | 1 | 2 | 0 | 3 |
| CNAG_04777 | chr10 | 432736 | 434274 | 1538 | null | S-adenosylmethionine-dependent methyltransferase             | 1 | 0 | 0 | 1 |
| CNAG_04774 | chr10 | 437190 | 441379 | 4189 | null | nuclear protein                                              | 1 | 0 | 1 | 2 |
| CNAG_04773 | chr10 | 443623 | 445518 | 1895 | null | hypothetical protein CNAG_04773                              | 0 | 0 | 1 | 1 |
| CNAG_04770 | chr10 | 451460 | 452771 | 1311 | null | nucleolar essential protein 1                                | 1 | 0 | 0 | 1 |
| CNAG_04767 | chr10 | 460758 | 462091 | 1333 | null | hypothetical protein CNAG_04767                              | 1 | 0 | 0 | 1 |
| CNAG_04766 | chr10 | 462521 | 463033 | 512  | null | hypothetical protein CNAG_04766                              | 0 | 1 | 0 | 1 |
| CNAG_04760 | chr10 | 471990 | 473144 | 1154 | null | cytoplasmic protein                                          | 0 | 1 | 0 | 1 |
| CNAG_04759 | chr10 | 474185 | 476068 | 1883 | null | hypothetical protein CNAG_04759                              | 1 | 0 | 1 | 2 |
| CNAG_04758 | chr10 | 477936 | 479720 | 1784 | AMT2 | amt family ammonium transporter                              | 0 | 2 | 0 | 2 |
| CNAG_04757 | chr10 | 480145 | 481330 | 1185 | null | mitochondrial protein                                        | 0 | 1 | 0 | 1 |
| CNAG_04755 | chr10 | 486568 | 492318 | 5750 | BCK1 | STE/STE11/BCK1 protein kinase                                | 0 | 2 | 0 | 2 |
| CNAG_04753 | chr10 | 497576 | 499456 | 1880 | null | gluconolactonase                                             | 0 | 2 | 1 | 3 |
| CNAG_04752 | chr10 | 502886 | 504229 | 1343 | null | hypothetical protein CNAG_04752                              | 2 | 0 | 1 | 3 |
| CNAG_07853 | chr10 | 506082 | 506358 | 276  | null | hypothetical protein CNAG_07853                              | 0 | 0 | 1 | 1 |
| CNAG_04747 | chr10 | 512676 | 514481 | 1805 | null | hypothetical protein CNAG_04747                              | 0 | 1 | 0 | 1 |
| CNAG_04746 | chr10 | 515150 | 517166 | 2016 | null | hypothetical protein CNAG_04746                              | 1 | 0 | 0 | 1 |
| CNAG_04742 | chr10 | 523993 | 525699 | 1706 | null | DNA primase large subunit                                    | 0 | 0 | 2 | 2 |
| CNAG_04741 | chr10 | 526624 | 528771 | 2147 | null | endosome protein                                             | 1 | 0 | 1 | 2 |
| CNAG_04740 | chr10 | 529498 | 532968 | 3470 | null | hypothetical protein CNAG_04740                              | 0 | 0 | 1 | 1 |
| CNAG_04733 | chr10 | 549226 | 553811 | 4585 | null | DNA repair protein RAD5                                      | 1 | 0 | 0 | 1 |
| CNAG_04730 | chr10 | 558260 | 561329 | 3069 | GPR4 | hypothetical protein CNAG_04730                              | 1 | 0 | 1 | 2 |
| CNAG_04729 | chr10 | 562690 | 565642 | 2952 | null | ATP-dependent RNA helicase DBP7                              | 0 | 2 | 0 | 2 |
| CNAG_04725 | chr10 | 571117 | 574160 | 3043 | null | hypothetical protein CNAG_04725                              | 0 | 1 | 0 | 1 |
| CNAG_04724 | chr10 | 574783 | 578931 | 4148 | null | ubiquitin-protein ligase E3 C                                | 0 | 0 | 2 | 2 |
| CNAG_04723 | chr10 | 579160 | 581019 | 1859 | null | hypothetical protein CNAG_04723                              | 1 | 0 | 0 | 1 |
| CNAG_04721 | chr10 | 588593 | 590503 | 1910 | null | hypothetical protein CNAG_04721                              | 0 | 1 | 0 | 1 |
| CNAG_04720 | chr10 | 591034 | 595059 | 4025 | null | GTPase activating protein                                    | 1 | 0 | 0 | 1 |
| CNAG_04718 | chr10 | 598625 | 599545 | 920  | null | hypothetical protein CNAG_04718                              | 0 | 1 | 0 | 1 |



|            |       |        |        |       |      |                                                                                  |   |   |   |   |
|------------|-------|--------|--------|-------|------|----------------------------------------------------------------------------------|---|---|---|---|
| CNAG_04717 | chr10 | 601030 | 602980 | 1950  | null | hypothetical protein CNAG_04717                                                  | 0 | 1 | 0 | 1 |
| CNAG_04716 | chr10 | 603483 | 604968 | 1485  | null | KH domain-containing protein                                                     | 0 | 0 | 1 | 1 |
| CNAG_04712 | chr10 | 612468 | 614011 | 1543  | null | solute carrier family 25 (mitochondrial dicarboxylate transporter), member 10    | 0 | 0 | 1 | 1 |
| CNAG_04711 | chr10 | 614660 | 616410 | 1750  | null | hypothetical protein CNAG_04711                                                  | 1 | 0 | 0 | 1 |
| CNAG_04710 | chr10 | 616795 | 618780 | 1985  | null | hypothetical protein CNAG_04710                                                  | 1 | 0 | 0 | 1 |
| CNAG_07855 | chr10 | 626069 | 641700 | 15631 | null | midasin                                                                          | 2 | 0 | 0 | 2 |
| CNAG_04705 | chr10 | 642670 | 645481 | 2811  | null | hypothetical protein CNAG_04705                                                  | 1 | 0 | 0 | 1 |
| CNAG_04703 | chr10 | 650327 | 653039 | 2712  | null | DNA clamp loader                                                                 | 1 | 1 | 0 | 2 |
| CNAG_04702 | chr10 | 653344 | 659424 | 6080  | null | hypothetical protein CNAG_04702                                                  | 0 | 1 | 1 | 2 |
| CNAG_04700 | chr10 | 660049 | 662457 | 2408  | null | hypothetical protein CNAG_04700                                                  | 1 | 0 | 0 | 1 |
| CNAG_04699 | chr10 | 662694 | 664758 | 2064  | null | microfibrillar-associated protein 1                                              | 0 | 0 | 1 | 1 |
| CNAG_04698 | chr10 | 664839 | 665541 | 702   | null | cytoplasmic protein                                                              | 1 | 0 | 0 | 1 |
| CNAG_04697 | chr10 | 665841 | 669654 | 3813  | null | zinc finger protein                                                              | 1 | 0 | 0 | 1 |
| CNAG_04696 | chr10 | 670947 | 673391 | 2444  | null | DNA clamp loader                                                                 | 0 | 2 | 1 | 3 |
| CNAG_04694 | chr10 | 677619 | 679538 | 1919  | null | periodic tryptophan protein 1                                                    | 0 | 1 | 0 | 1 |
| CNAG_04693 | chr10 | 679939 | 682745 | 2806  | SIN1 | hypothetical protein CNAG_04693                                                  | 1 | 1 | 0 | 2 |
| CNAG_04691 | chr10 | 687001 | 688455 | 1454  | null | hypothetical protein CNAG_04691                                                  | 1 | 0 | 0 | 1 |
| CNAG_04689 | chr10 | 690191 | 691190 | 999   | null | hypothetical protein CNAG_04689                                                  | 0 | 1 | 0 | 1 |
| CNAG_04687 | chr10 | 694379 | 696319 | 1940  | null | stearoyl-CoA desaturase (delta-9 desaturase)                                     | 0 | 1 | 0 | 1 |
| CNAG_07856 | chr10 | 698782 | 700795 | 2013  | null | hypothetical protein CNAG_07856                                                  | 0 | 1 | 0 | 1 |
| CNAG_04682 | chr10 | 706085 | 706948 | 863   | null | DNA replication complex GINS protein PSF3                                        | 1 | 0 | 0 | 1 |
| CNAG_04681 | chr10 | 708117 | 709999 | 1882  | null | hypothetical protein CNAG_04681                                                  | 2 | 0 | 0 | 2 |
| CNAG_04680 | chr10 | 710137 | 710957 | 820   | null | hypothetical protein CNAG_04680                                                  | 0 | 1 | 0 | 1 |
| CNAG_04675 | chr10 | 721021 | 721725 | 704   | null | hypothetical protein CNAG_04675                                                  | 1 | 0 | 0 | 1 |
| CNAG_04674 | chr10 | 722107 | 724319 | 2212  | ADA3 | transcriptional adapter 3                                                        | 0 | 1 | 0 | 1 |
| CNAG_04669 | chr10 | 731108 | 732408 | 1300  | null | mitochondrial matrix protein import protein                                      | 0 | 1 | 0 | 1 |
| CNAG_04662 | chr10 | 740538 | 744490 | 3952  | CTF4 | chromosome transmission fidelity protein 4                                       | 1 | 0 | 0 | 1 |
| CNAG_08000 | chr10 | 744906 | 753038 | 8132  | null | hypothetical protein CNAG_08000                                                  | 1 | 0 | 0 | 1 |
| CNAG_04659 | chr10 | 754538 | 756872 | 2334  | null | pyruvate decarboxylase                                                           | 0 | 0 | 1 | 1 |
| CNAG_04657 | chr10 | 760039 | 760866 | 827   | null | short-chain dehydrogenase                                                        | 0 | 1 | 0 | 1 |
| CNAG_04655 | chr10 | 765366 | 768051 | 2685  | null | rab family protein                                                               | 0 | 1 | 0 | 1 |
| CNAG_04654 | chr10 | 768783 | 770007 | 1224  | null | UNC-50 family protein                                                            | 0 | 0 | 1 | 1 |
| CNAG_04653 | chr10 | 770424 | 771411 | 987   | null | hypothetical protein CNAG_04653                                                  | 0 | 1 | 0 | 1 |
| CNAG_04648 | chr10 | 779205 | 784211 | 5006  | null | sister chromatid cohesion protein PDS5                                           | 1 | 0 | 0 | 1 |
| CNAG_04647 | chr10 | 784611 | 786265 | 1654  | null | glutathione synthetase                                                           | 0 | 1 | 0 | 1 |
| CNAG_07857 | chr10 | 787504 | 790736 | 3232  | null | hypothetical protein CNAG_07857                                                  | 0 | 0 | 1 | 1 |
| CNAG_04641 | chr10 | 793533 | 797215 | 3682  | null | general transcription factor 3C polypeptide 3 (transcription factor C subunit 4) | 1 | 0 | 0 | 1 |
| CNAG_04640 | chr10 | 797817 | 801668 | 3851  | ACL1 | ATP-citrate synthase subunit 1                                                   | 0 | 0 | 1 | 1 |
| CNAG_04639 | chr10 | 803664 | 806762 | 3098  | null | hypothetical protein CNAG_04639                                                  | 2 | 0 | 0 | 2 |
| CNAG_04633 | chr10 | 824680 | 825487 | 807   | null | hypothetical protein CNAG_04633                                                  | 0 | 3 | 0 | 3 |
| CNAG_04632 | chr10 | 827628 | 829682 | 2054  | null | uracil permease                                                                  | 0 | 1 | 1 | 2 |
| CNAG_04630 | chr10 | 833236 | 835428 | 2192  | null | hypothetical protein CNAG_04630                                                  | 0 | 1 | 1 | 2 |
| CNAG_04629 | chr10 | 836568 | 838736 | 2168  | null | Mob1 family protein                                                              | 1 | 0 | 0 | 1 |
| CNAG_04626 | chr10 | 843599 | 847962 | 4363  | null | hypothetical protein CNAG_04626                                                  | 1 | 0 | 0 | 1 |
| CNAG_04623 | chr10 | 851056 | 851958 | 902   | null | hypothetical protein CNAG_04623                                                  | 0 | 1 | 0 | 1 |
| CNAG_04621 | chr10 | 855966 | 858653 | 2687  | null | glycogen(starch) synthase                                                        | 0 | 2 | 0 | 2 |
| CNAG_04619 | chr10 | 861556 | 864446 | 2890  | null | prolyl oligopeptidase                                                            | 1 | 0 | 0 | 1 |

|            |       |         |         |      |       |                                                                                    |   |   |   |   |
|------------|-------|---------|---------|------|-------|------------------------------------------------------------------------------------|---|---|---|---|
| CNAG_04617 | chr10 | 869228  | 872114  | 2886 | null  | OPT family small oligopeptide transporter                                          | 1 | 1 | 0 | 2 |
| CNAG_04616 | chr10 | 874357  | 876688  | 2331 | null  | hypothetical protein CNAG_04616                                                    | 0 | 1 | 0 | 1 |
| CNAG_04615 | chr10 | 877803  | 881405  | 3602 | null  | L-aminoadipate-semialdehyde dehydrogenase                                          | 1 | 0 | 0 | 1 |
| CNAG_04614 | chr10 | 881594  | 882971  | 1377 | null  | hypothetical protein CNAG_04614                                                    | 0 | 1 | 0 | 1 |
| CNAG_04608 | chr10 | 900946  | 902179  | 1233 | null  | signal peptidase I                                                                 | 0 | 1 | 0 | 1 |
| CNAG_04604 | chr10 | 908379  | 910683  | 2304 | null  | tryptophan-tRNA ligase                                                             | 0 | 1 | 0 | 1 |
| CNAG_04600 | chr10 | 919119  | 923443  | 4324 | null  | DNA topoisomerase III                                                              | 0 | 0 | 2 | 2 |
| CNAG_04599 | chr10 | 923603  | 926905  | 3302 | null  | 3-methyl-2-oxobutanoate hydroxymethyltransferase                                   | 0 | 1 | 0 | 1 |
| CNAG_04598 | chr10 | 927451  | 928644  | 1193 | null  | hypothetical protein CNAG_04598                                                    | 2 | 0 | 0 | 2 |
| CNAG_04597 | chr10 | 929456  | 931386  | 1930 | null  | hypothetical protein CNAG_04597                                                    | 2 | 1 | 0 | 3 |
| CNAG_04592 | chr10 | 941326  | 941781  | 455  | null  | hypothetical protein CNAG_04592                                                    | 0 | 1 | 0 | 1 |
| CNAG_04589 | chr10 | 946527  | 947945  | 1418 | null  | hypothetical protein CNAG_04589                                                    | 0 | 1 | 1 | 2 |
| CNAG_04587 | chr10 | 951356  | 954729  | 3373 | null  | hypothetical protein CNAG_04587                                                    | 0 | 2 | 0 | 2 |
| CNAG_04586 | chr10 | 958575  | 961194  | 2619 | null  | LIM-homeobox protein                                                               | 0 | 1 | 0 | 1 |
| CNAG_04583 | chr10 | 967957  | 971353  | 3396 | null  | hypothetical protein CNAG_04583                                                    | 1 | 0 | 0 | 1 |
| CNAG_04582 | chr10 | 973824  | 975180  | 1356 | null  | hypothetical protein CNAG_04582                                                    | 0 | 1 | 0 | 1 |
| CNAG_04579 | chr10 | 979775  | 982878  | 3103 | null  | alpha-1,2-mannosyltransferase                                                      | 1 | 0 | 0 | 1 |
| CNAG_07859 | chr10 | 983139  | 984432  | 1293 | null  | peptidyl-prolyl cis-trans isomerase-like 2                                         | 1 | 0 | 0 | 1 |
| CNAG_07860 | chr10 | 984623  | 986814  | 2191 | null  | peptidyl-prolyl cis-trans isomerase-like 2                                         | 0 | 0 | 1 | 1 |
| CNAG_07861 | chr10 | 986887  | 987646  | 759  | null  | hypothetical protein CNAG_07861                                                    | 1 | 0 | 0 | 1 |
| CNAG_04561 | chr10 | 1029797 | 1032095 | 2298 | null  | monooxygenase                                                                      | 0 | 1 | 0 | 1 |
| CNAG_07867 | chr10 | 1033823 | 1037705 | 3882 | null  | hypothetical protein CNAG_07867                                                    | 0 | 1 | 1 | 2 |
| CNAG_04558 | chr10 | 1039133 | 1039490 | 357  | null  | hypothetical protein CNAG_04558                                                    | 1 | 0 | 0 | 1 |
| CNAG_04552 | chr10 | 1048840 | 1050864 | 2024 | ITR1A | hypothetical protein CNAG_04552                                                    | 0 | 1 | 0 | 1 |
| CNAG_08002 | chr11 | 13611   | 17959   | 4348 | null  | hypothetical protein CNAG_08002                                                    | 2 | 2 | 2 | 6 |
| CNAG_01465 | chr11 | 24643   | 26831   | 2188 | null  | 5' flap endonuclease                                                               | 1 | 2 | 1 | 4 |
| CNAG_01466 | chr11 | 27405   | 30080   | 2675 | null  | hypothetical protein CNAG_01466                                                    | 1 | 0 | 1 | 2 |
| CNAG_01467 | chr11 | 30743   | 32480   | 1737 | null  | solute carrier family 35, member F5                                                | 0 | 0 | 1 | 1 |
| CNAG_01468 | chr11 | 32899   | 35725   | 2826 | null  | hypothetical protein CNAG_01468                                                    | 0 | 4 | 1 | 5 |
| CNAG_01470 | chr11 | 40128   | 41085   | 957  | null  | NADH dehydrogenase (ubiquinone) flavoprotein 2                                     | 0 | 1 | 0 | 1 |
| CNAG_01472 | chr11 | 43768   | 47046   | 3278 | null  | endoplasmic reticulum protein                                                      | 0 | 1 | 0 | 1 |
| CNAG_01473 | chr11 | 47870   | 50614   | 2744 | null  | hypothetical protein CNAG_01473                                                    | 1 | 2 | 1 | 4 |
| CNAG_01474 | chr11 | 51658   | 54509   | 2851 | null  | hypothetical protein CNAG_01474                                                    | 0 | 2 | 1 | 3 |
| CNAG_01476 | chr11 | 59360   | 64296   | 4936 | null  | hypothetical protein CNAG_01476                                                    | 2 | 0 | 1 | 3 |
| CNAG_01477 | chr11 | 64925   | 67166   | 2241 | null  | serine palmitoyltransferase                                                        | 0 | 1 | 0 | 1 |
| CNAG_01482 | chr11 | 77686   | 79914   | 2228 | null  | solute carrier family 25 (mitochondrial phosphate transporter), member 23/24/25/41 | 1 | 0 | 1 | 2 |
| CNAG_01483 | chr11 | 80306   | 83058   | 2752 | null  | hypothetical protein CNAG_01483                                                    | 0 | 1 | 0 | 1 |
| CNAG_01485 | chr11 | 85231   | 87291   | 2060 | null  | D-lactate dehydrogenase (cytochrome)                                               | 1 | 4 | 0 | 5 |
| CNAG_01487 | chr11 | 91126   | 92639   | 1513 | null  | hypothetical protein CNAG_01487                                                    | 0 | 1 | 0 | 1 |
| CNAG_07587 | chr11 | 93845   | 94863   | 1018 | null  | hypothetical protein CNAG_07587                                                    | 1 | 0 | 0 | 1 |
| CNAG_01494 | chr11 | 106393  | 107292  | 899  | null  | hypothetical protein CNAG_01494                                                    | 1 | 0 | 1 | 2 |
| CNAG_01497 | chr11 | 113096  | 115332  | 2236 | null  | integral membrane protein                                                          | 1 | 1 | 0 | 2 |
| CNAG_01498 | chr11 | 115811  | 118127  | 2316 | null  | arylsulfatase                                                                      | 0 | 1 | 0 | 1 |
| CNAG_01501 | chr11 | 124970  | 126051  | 1081 | null  | hypothetical protein CNAG_01501                                                    | 0 | 1 | 0 | 1 |
| CNAG_01504 | chr11 | 131033  | 132021  | 988  | null  | hypothetical protein CNAG_01504                                                    | 1 | 0 | 0 | 1 |
| CNAG_01506 | chr11 | 135280  | 136753  | 1473 | null  | hypothetical protein CNAG_01506                                                    | 1 | 0 | 0 | 1 |
| CNAG_01508 | chr11 | 138708  | 142251  | 3543 | null  | hypothetical protein CNAG_01508                                                    | 2 | 0 | 0 | 2 |

|            |       |        |        |      |      |                                                           |   |   |   |   |
|------------|-------|--------|--------|------|------|-----------------------------------------------------------|---|---|---|---|
| CNAG_01510 | chr11 | 144203 | 148498 | 4295 | null | hypothetical protein CNAG_01510                           | 1 | 0 | 0 | 1 |
| CNAG_01513 | chr11 | 156452 | 158331 | 1879 | null | hypothetical protein CNAG_01513                           | 0 | 1 | 1 | 2 |
| CNAG_07591 | chr11 | 164856 | 166560 | 1704 | null | mitochondrial metalloendopeptidase OMA1                   | 1 | 0 | 0 | 1 |
| CNAG_01519 | chr11 | 169147 | 170495 | 1348 | null | endonuclease/exonuclease/phosphatase                      | 0 | 1 | 0 | 1 |
| CNAG_01520 | chr11 | 170775 | 172918 | 2143 | null | histone-arginine methyltransferase CARM1                  | 0 | 0 | 1 | 1 |
| CNAG_01521 | chr11 | 173170 | 174622 | 1452 | null | metallo-beta-lactamase                                    | 0 | 1 | 1 | 2 |
| CNAG_01522 | chr11 | 174892 | 176369 | 1477 | null | phenylalanine-tRNA ligase                                 | 1 | 0 | 0 | 1 |
| CNAG_01523 | chr11 | 176967 | 178586 | 1619 | HOG1 | CMGC/MAPK/P38 protein kinase                              | 0 | 1 | 0 | 1 |
| CNAG_01526 | chr11 | 183463 | 185651 | 2188 | null | cleavage and polyadenylation specificity factor subunit 4 | 1 | 0 | 0 | 1 |
| CNAG_01530 | chr11 | 195573 | 200242 | 4669 | MGA2 | suppressor protein SPT23                                  | 1 | 0 | 0 | 1 |
| CNAG_01533 | chr11 | 210678 | 213902 | 3224 | null | rho GTPase activator                                      | 1 | 0 | 0 | 1 |
| CNAG_01535 | chr11 | 216233 | 218650 | 2417 | null | amino acid permease                                       | 2 | 0 | 0 | 2 |
| CNAG_01539 | chr11 | 234981 | 236904 | 1923 | null | myo-inositol-1-phosphate synthase                         | 0 | 1 | 0 | 1 |
| CNAG_01543 | chr11 | 243958 | 246865 | 2907 | null | AP-3 complex subunit beta                                 | 1 | 0 | 0 | 1 |
| CNAG_01544 | chr11 | 246940 | 249039 | 2099 | null | histidyl-tRNA synthetase                                  | 0 | 1 | 0 | 1 |
| CNAG_01547 | chr11 | 252608 | 254985 | 2377 | null | WD-repeat protein                                         | 1 | 0 | 0 | 1 |
| CNAG_01559 | chr11 | 275860 | 278967 | 3107 | null | hypothetical protein CNAG_01559                           | 1 | 0 | 0 | 1 |
| CNAG_01562 | chr11 | 289580 | 290604 | 1024 | BLP4 | hypothetical protein CNAG_01562                           | 0 | 1 | 0 | 1 |
| CNAG_01563 | chr11 | 291541 | 294715 | 3174 | null | histone deacetylase 6/10                                  | 0 | 1 | 0 | 1 |
| CNAG_01565 | chr11 | 297397 | 299983 | 2586 | null | biotin                                                    | 0 | 1 | 1 | 2 |
| CNAG_01566 | chr11 | 300936 | 304325 | 3389 | null | gamma-tubulin complex component 3                         | 0 | 0 | 1 | 1 |
| CNAG_01567 | chr11 | 304997 | 306644 | 1647 | null | hypothetical protein CNAG_01567                           | 0 | 2 | 0 | 2 |
| CNAG_01570 | chr11 | 310746 | 312316 | 1570 | null | hypothetical protein CNAG_01570                           | 0 | 1 | 0 | 1 |
| CNAG_01571 | chr11 | 313890 | 315030 | 1140 | null | hypothetical protein CNAG_01571                           | 0 | 1 | 0 | 1 |
| CNAG_01572 | chr11 | 318753 | 321154 | 2401 | null | tyrosine phosphatase                                      | 0 | 1 | 0 | 1 |
| CNAG_01573 | chr11 | 321774 | 324900 | 3126 | null | hypothetical protein CNAG_01573                           | 1 | 1 | 0 | 2 |
| CNAG_01579 | chr11 | 342670 | 348752 | 6082 | null | vacuolar membrane-associated protein IML1                 | 1 | 1 | 0 | 2 |
| CNAG_01580 | chr11 | 349363 | 353974 | 4611 | SCP1 | hypothetical protein CNAG_01580                           | 0 | 0 | 1 | 1 |
| CNAG_01583 | chr11 | 355697 | 356778 | 1081 | null | vacuolar-sorting protein SNF7                             | 0 | 1 | 0 | 1 |
| CNAG_01585 | chr11 | 359061 | 359587 | 526  | null | hypothetical protein CNAG_01585                           | 0 | 1 | 0 | 1 |
| CNAG_01586 | chr11 | 359880 | 361055 | 1175 | null | F-type H -transporting ATPase subunit B                   | 0 | 1 | 1 | 2 |
| CNAG_01587 | chr11 | 361270 | 362814 | 1544 | null | RNA polymerase-associated protein LEO1                    | 0 | 0 | 2 | 2 |
| CNAG_01591 | chr11 | 367146 | 371325 | 4179 | null | hypothetical protein CNAG_01591                           | 0 | 1 | 0 | 1 |
| CNAG_01592 | chr11 | 371683 | 372681 | 998  | null | protein-S-isoprenylcysteine O-methyltransferase           | 0 | 1 | 0 | 1 |
| CNAG_01595 | chr11 | 379142 | 381236 | 2094 | null | hypothetical protein CNAG_01595                           | 0 | 1 | 0 | 1 |
| CNAG_01599 | chr11 | 385459 | 386204 | 745  | null | hypothetical protein CNAG_01599                           | 0 | 1 | 0 | 1 |
| CNAG_01600 | chr11 | 386383 | 387978 | 1595 | null | ribosome assembly protein RRB1                            | 0 | 0 | 1 | 1 |
| CNAG_01601 | chr11 | 388128 | 389977 | 1849 | null | lipase                                                    | 1 | 0 | 1 | 2 |
| CNAG_01602 | chr11 | 390498 | 393052 | 2554 | null | IQ domain-containing calmodulin-binding protein           | 0 | 0 | 1 | 1 |
| CNAG_01604 | chr11 | 397155 | 398231 | 1076 | null | TIGR01458 family HAD hydrolase                            | 1 | 0 | 0 | 1 |
| CNAG_01608 | chr11 | 402254 | 404624 | 2370 | null | nuclear GTP-binding protein                               | 0 | 0 | 1 | 1 |
| CNAG_01610 | chr11 | 408380 | 412445 | 4065 | null | hypothetical protein CNAG_01610                           | 0 | 3 | 0 | 3 |
| CNAG_01612 | chr11 | 417866 | 420148 | 2282 | null | CAMK/CAMKL protein kinase                                 | 1 | 0 | 0 | 1 |
| CNAG_01616 | chr11 | 432446 | 436177 | 3731 | null | hypothetical protein CNAG_01616                           | 0 | 0 | 2 | 2 |
| CNAG_01620 | chr11 | 443769 | 445734 | 1965 | null | hypothetical protein CNAG_01620                           | 0 | 1 | 0 | 1 |
| CNAG_01628 | chr11 | 460321 | 460844 | 523  | null | small subunit ribosomal protein S20                       | 0 | 1 | 0 | 1 |
| CNAG_01630 | chr11 | 461993 | 464395 | 2402 | null | polyadenylation factor subunit 2                          | 0 | 0 | 1 | 1 |

|                   |              |               |               |             |             |                                                                   |          |           |          |           |
|-------------------|--------------|---------------|---------------|-------------|-------------|-------------------------------------------------------------------|----------|-----------|----------|-----------|
| CNAG_01640        | chr11        | 486069        | 496381        | 10312       | null        | hypothetical protein CNAG_01640                                   | 0        | 0         | 1        | 1         |
| CNAG_01641        | chr11        | 496810        | 500718        | 3908        | null        | DNA polymerase phi subunit                                        | 1        | 0         | 0        | 1         |
| CNAG_01642        | chr11        | 501349        | 506389        | 5040        | null        | DNA mismatch repair protein MSH3                                  | 0        | 1         | 0        | 1         |
| CNAG_01651        | chr11        | 521792        | 524727        | 2935        | null        | glicosidase                                                       | 0        | 1         | 0        | 1         |
| CNAG_01653        | chr11        | 528035        | 529038        | 1003        | CIG1        | cytokine inducing-glycoprotein                                    | 0        | 1         | 0        | 1         |
| CNAG_01654        | chr11        | 531228        | 533781        | 2553        | CAS34       | hypothetical protein CNAG_01654                                   | 0        | 0         | 1        | 1         |
| CNAG_01656        | chr11        | 537932        | 539422        | 1490        | null        | hypothetical protein CNAG_01656                                   | 0        | 1         | 0        | 1         |
| CNAG_01659        | chr11        | 546138        | 547891        | 1753        | null        | hypothetical protein CNAG_01659                                   | 0        | 1         | 0        | 1         |
| CNAG_01663        | chr11        | 553278        | 555208        | 1930        | null        | dynactin 4                                                        | 1        | 2         | 0        | 3         |
| CNAG_01665        | chr11        | 557157        | 558284        | 1127        | null        | tRNA-splicing endonuclease subunit Sen34                          | 0        | 1         | 0        | 1         |
| CNAG_01667        | chr11        | 559536        | 560976        | 1440        | COQ2        | 4-hydroxybenzoate polyprenyl transferase                          | 1        | 0         | 0        | 1         |
| CNAG_01676        | chr11        | 578499        | 580492        | 1993        | null        | tRNA (adenine-N(1)-)-methyltransferase non-catalytic subunit TRM6 | 1        | 0         | 0        | 1         |
| CNAG_01679        | chr11        | 586213        | 587075        | 862         | null        | small subunit ribosomal protein S15                               | 1        | 0         | 0        | 1         |
| CNAG_01682        | chr11        | 596693        | 598851        | 2158        | null        | mitochondrial outer membrane 72K protein                          | 0        | 0         | 1        | 1         |
| CNAG_01692        | chr11        | 626011        | 627789        | 1778        | UBA3        | ubiquitin-activating enzyme E1 C                                  | 0        | 1         | 0        | 1         |
| CNAG_01694        | chr11        | 629579        | 635048        | 5469        | null        | hypothetical protein CNAG_01694                                   | 0        | 0         | 1        | 1         |
| CNAG_01695        | chr11        | 636089        | 637637        | 1548        | null        | hypothetical protein CNAG_01695                                   | 0        | 0         | 1        | 1         |
| CNAG_01696        | chr11        | 638120        | 639974        | 1854        | null        | chaperone DnaJ                                                    | 1        | 1         | 0        | 2         |
| CNAG_01697        | chr11        | 640317        | 642052        | 1735        | CSN1201     | hypothetical protein CNAG_01697                                   | 0        | 1         | 1        | 2         |
| CNAG_01698        | chr11        | 642668        | 644751        | 2083        | null        | hypothetical protein CNAG_01698                                   | 3        | 0         | 1        | 4         |
| CNAG_07598        | chr11        | 648479        | 652230        | 3751        | null        | importin-alpha export receptor                                    | 1        | 1         | 0        | 2         |
| CNAG_01703        | chr11        | 658204        | 659849        | 1645        | null        | hypothetical protein CNAG_01703                                   | 1        | 0         | 0        | 1         |
| CNAG_01704        | chr11        | 660627        | 664013        | 3386        | null        | serine/threonine protein kinase                                   | 0        | 0         | 1        | 1         |
| CNAG_01706        | chr11        | 665349        | 667221        | 1872        | null        | hypothetical protein CNAG_01706                                   | 0        | 1         | 0        | 1         |
| CNAG_01707        | chr11        | 667543        | 671984        | 4441        | CRG3        | hypothetical protein CNAG_01707                                   | 2        | 2         | 1        | 5         |
| CNAG_01708        | chr11        | 672209        | 675519        | 3310        | null        | hypothetical protein CNAG_01708                                   | 1        | 0         | 0        | 1         |
| CNAG_01709        | chr11        | 675850        | 677223        | 1373        | null        | translation initiation factor 5                                   | 0        | 2         | 0        | 2         |
| CNAG_01710        | chr11        | 678096        | 679850        | 1754        | null        | hypothetical protein CNAG_01710                                   | 1        | 0         | 0        | 1         |
| CNAG_01712        | chr11        | 683539        | 685951        | 2412        | null        | hypothetical protein CNAG_01712                                   | 1        | 0         | 1        | 2         |
| CNAG_01715        | chr11        | 690345        | 694031        | 3686        | null        | ribosome biogenesis protein BMS1                                  | 1        | 1         | 1        | 3         |
| CNAG_01716        | chr11        | 694262        | 696861        | 2599        | null        | hypothetical protein CNAG_01716                                   | 0        | 1         | 0        | 1         |
| <b>CNAG_01717</b> | <b>chr11</b> | <b>697418</b> | <b>698958</b> | <b>1540</b> | <b>null</b> | <b>cell differentiation protein rcd1</b>                          | <b>1</b> | <b>11</b> | <b>3</b> | <b>15</b> |
| CNAG_01718        | chr11        | 699124        | 701492        | 2368        | null        | hypothetical protein CNAG_01718                                   | 1        | 0         | 0        | 1         |
| CNAG_01719        | chr11        | 702153        | 703748        | 1595        | null        | hypothetical protein CNAG_01719                                   | 0        | 0         | 1        | 1         |
| CNAG_01721        | chr11        | 706574        | 708081        | 1507        | HEM3        | porphobilinogen deaminase                                         | 0        | 1         | 0        | 1         |
| CNAG_01722        | chr11        | 708600        | 719766        | 11166       | null        | vacuolar protein sorting-associated protein vps13                 | 1        | 1         | 0        | 2         |
| CNAG_01727        | chr11        | 729251        | 731501        | 2250        | null        | hsp71-like protein                                                | 0        | 1         | 0        | 1         |
| CNAG_01729        | chr11        | 734192        | 738425        | 4233        | null        | ATP-dependent RNA helicase DHX37/DHR1                             | 2        | 0         | 0        | 2         |
| CNAG_01730        | chr11        | 738664        | 740350        | 1686        | STE7        | STE/STE7/MEK1 protein kinase                                      | 0        | 1         | 0        | 1         |
| CNAG_01731        | chr11        | 741852        | 744219        | 2367        | null        | hypothetical protein CNAG_01731                                   | 1        | 0         | 0        | 1         |
| CNAG_01732        | chr11        | 744407        | 746913        | 2506        | null        | nuclear protein localization protein 4                            | 1        | 0         | 0        | 1         |
| CNAG_01733        | chr11        | 747258        | 749115        | 1857        | null        | pre-mRNA-processing factor 19                                     | 0        | 1         | 0        | 1         |
| CNAG_01737        | chr11        | 755647        | 756908        | 1261        | ERG25       | methylsterol monooxygenase                                        | 0        | 1         | 0        | 1         |
| CNAG_01738        | chr11        | 757556        | 760476        | 2920        | null        | hypothetical protein CNAG_01738                                   | 0        | 1         | 0        | 1         |
| CNAG_01745        | chr11        | 773985        | 775416        | 1431        | null        | glycerol-3-phosphate dehydrogenase (NAD())                        | 1        | 0         | 0        | 1         |
| CNAG_01749        | chr11        | 786452        | 787004        | 552         | null        | hypothetical protein CNAG_01749                                   | 0        | 1         | 0        | 1         |
| CNAG_01750        | chr11        | 787897        | 790112        | 2215        | null        | hsp72-like protein                                                | 0        | 0         | 1        | 1         |

|            |       |         |         |      |       |                                                                                    |   |   |   |   |
|------------|-------|---------|---------|------|-------|------------------------------------------------------------------------------------|---|---|---|---|
| CNAG_01752 | chr11 | 793346  | 794813  | 1467 | null  | solute carrier family 25 (mitochondrial 2-oxodicarboxylate transporter), member 21 | 0 | 2 | 0 | 2 |
| CNAG_01754 | chr11 | 797201  | 800374  | 3173 | null  | hypothetical protein CNAG_01754                                                    | 0 | 1 | 1 | 2 |
| CNAG_01755 | chr11 | 800650  | 803402  | 2752 | null  | hypothetical protein CNAG_01755                                                    | 1 | 0 | 0 | 1 |
| CNAG_01764 | chr11 | 825780  | 828809  | 3029 | null  | cytoplasmic protein                                                                | 1 | 0 | 0 | 1 |
| CNAG_07604 | chr11 | 833183  | 835557  | 2374 | FRES  | metalloreductase                                                                   | 2 | 1 | 0 | 3 |
| CNAG_01768 | chr11 | 837322  | 839472  | 2150 | null  | hypothetical protein CNAG_01768                                                    | 1 | 0 | 0 | 1 |
| CNAG_01770 | chr11 | 844448  | 846832  | 2384 | null  | MRS7 family protein                                                                | 0 | 1 | 1 | 2 |
| CNAG_01771 | chr11 | 847016  | 847758  | 742  | null  | hypothetical protein CNAG_01771                                                    | 0 | 1 | 0 | 1 |
| CNAG_07605 | chr11 | 853153  | 857339  | 4186 | null  | hypothetical protein CNAG_07605                                                    | 1 | 4 | 1 | 6 |
| CNAG_01777 | chr11 | 861050  | 862529  | 1479 | null  | glyoxylate reductase                                                               | 0 | 1 | 0 | 1 |
| CNAG_01779 | chr11 | 864585  | 865940  | 1355 | null  | hypothetical protein CNAG_01779                                                    | 1 | 1 | 0 | 2 |
| CNAG_01781 | chr11 | 871014  | 871784  | 770  | null  | hypothetical protein CNAG_01781                                                    | 1 | 0 | 0 | 1 |
| CNAG_01787 | chr11 | 929453  | 930708  | 1255 | null  | hypothetical protein CNAG_01787                                                    | 2 | 6 | 0 | 8 |
| CNAG_01788 | chr11 | 934108  | 935267  | 1159 | null  | tRNA(His) guanylyltransferase                                                      | 0 | 1 | 0 | 1 |
| CNAG_01790 | chr11 | 936586  | 937665  | 1079 | null  | upstream activation factor subunit UAF30                                           | 2 | 0 | 1 | 3 |
| CNAG_01792 | chr11 | 940876  | 943251  | 2375 | null  | ATP-dependent DNA helicase PIF1                                                    | 1 | 0 | 0 | 1 |
| CNAG_01795 | chr11 | 949788  | 952914  | 3126 | null  | hypothetical protein CNAG_01795                                                    | 1 | 1 | 0 | 2 |
| CNAG_01796 | chr11 | 953590  | 955607  | 2017 | null  | hypothetical protein CNAG_01796                                                    | 0 | 1 | 0 | 1 |
| CNAG_01799 | chr11 | 960422  | 961192  | 770  | null  | ubiquinol-cytochrome c reductase subunit 8                                         | 0 | 1 | 0 | 1 |
| CNAG_01802 | chr11 | 963200  | 964287  | 1087 | null  | Fe-S cluster assembly protein DRE2                                                 | 0 | 4 | 0 | 4 |
| CNAG_01806 | chr11 | 971095  | 973503  | 2408 | null  | hypothetical protein CNAG_01806                                                    | 1 | 0 | 1 | 2 |
| CNAG_01807 | chr11 | 974143  | 978083  | 3940 | null  | ATP-dependent helicase                                                             | 0 | 1 | 0 | 1 |
| CNAG_01809 | chr11 | 980387  | 982277  | 1890 | null  | U4/U6 small nuclear ribonucleoprotein PRP3                                         | 0 | 0 | 1 | 1 |
| CNAG_01810 | chr11 | 982425  | 983076  | 651  | null  | DNA-directed RNA polymerase I subunit RPA12                                        | 0 | 1 | 0 | 1 |
| CNAG_01811 | chr11 | 983570  | 984814  | 1244 | null  | hypothetical protein CNAG_01811                                                    | 0 | 1 | 1 | 2 |
| CNAG_01817 | chr11 | 994494  | 996872  | 2378 | null  | signal recognition particle receptor subunit alpha                                 | 0 | 1 | 0 | 1 |
| CNAG_01823 | chr11 | 1007280 | 1008995 | 1715 | null  | myo-inositol-1(or 4)-monophosphatase                                               | 0 | 1 | 0 | 1 |
| CNAG_01834 | chr11 | 1036816 | 1037934 | 1118 | null  | hypothetical protein CNAG_01834                                                    | 0 | 1 | 0 | 1 |
| CNAG_01847 | chr11 | 1072993 | 1075444 | 2451 | null  | hypothetical protein CNAG_01847                                                    | 0 | 2 | 0 | 2 |
| CNAG_01848 | chr11 | 1077440 | 1082155 | 4715 | null  | hypothetical protein CNAG_01848                                                    | 1 | 0 | 0 | 1 |
| CNAG_01849 | chr11 | 1083198 | 1084159 | 961  | null  | hypothetical protein CNAG_01849                                                    | 0 | 1 | 0 | 1 |
| CNAG_01858 | chr11 | 1105182 | 1106955 | 1773 | null  | hypothetical protein CNAG_01858                                                    | 2 | 0 | 0 | 2 |
| CNAG_01859 | chr11 | 1108389 | 1111106 | 2717 | null  | hypothetical protein CNAG_01859                                                    | 0 | 1 | 0 | 1 |
| CNAG_01864 | chr11 | 1125431 | 1127249 | 1818 | null  | hypothetical protein CNAG_01864                                                    | 0 | 1 | 0 | 1 |
| CNAG_01866 | chr11 | 1130384 | 1133806 | 3422 | null  | hypothetical protein CNAG_01866                                                    | 2 | 1 | 0 | 3 |
| CNAG_01867 | chr11 | 1134879 | 1137425 | 2546 | null  | mitochondrial division protein 1                                                   | 1 | 0 | 0 | 1 |
| CNAG_01869 | chr11 | 1138855 | 1140962 | 2107 | null  | hypothetical protein CNAG_01869                                                    | 0 | 0 | 1 | 1 |
| CNAG_01871 | chr11 | 1142824 | 1144496 | 1672 | null  | prolactin regulatory element-binding protein                                       | 0 | 1 | 0 | 1 |
| CNAG_01874 | chr11 | 1147346 | 1148132 | 786  | null  | glutathione S-transferase                                                          | 0 | 1 | 0 | 1 |
| CNAG_01875 | chr11 | 1148539 | 1153810 | 5271 | null  | WD-repeat protein                                                                  | 1 | 0 | 2 | 3 |
| CNAG_01880 | chr11 | 1164342 | 1166073 | 1731 | null  | hypothetical protein CNAG_01880                                                    | 0 | 0 | 1 | 1 |
| CNAG_01882 | chr11 | 1167426 | 1169655 | 2229 | null  | histone-lysine N-methyltransferase, H3 lysine-79 specific                          | 0 | 1 | 0 | 1 |
| CNAG_01883 | chr11 | 1171247 | 1173092 | 1845 | null  | hypothetical protein CNAG_01883                                                    | 1 | 0 | 0 | 1 |
| CNAG_01885 | chr11 | 1176246 | 1178873 | 2627 | CID14 | DNA polymerase sigma subunit                                                       | 0 | 0 | 1 | 1 |
| CNAG_07612 | chr11 | 1180451 | 1181678 | 1227 | null  | hypothetical protein CNAG_07612                                                    | 0 | 0 | 1 | 1 |
| CNAG_01890 | chr11 | 1185400 | 1188066 | 2666 | MET6  | 5-methyltetrahydropteroyltriglutamate-homocysteine S-methyltransferase             | 0 | 0 | 1 | 1 |
| CNAG_01892 | chr11 | 1190592 | 1191370 | 778  | null  | hypothetical protein CNAG_01892                                                    | 0 | 1 | 0 | 1 |

|            |       |         |         |      |      |                                                                        |   |   |   |   |
|------------|-------|---------|---------|------|------|------------------------------------------------------------------------|---|---|---|---|
| CNAG_01905 | chr11 | 1225284 | 1229083 | 3799 | KSP1 | serine/threonine protein kinase                                        | 1 | 1 | 0 | 2 |
| CNAG_01926 | chr11 | 1283010 | 1285419 | 2409 | PEX5 | peroxisome targeting signal receptor                                   | 1 | 0 | 0 | 1 |
| CNAG_01927 | chr11 | 1285703 | 1286625 | 922  | null | hypothetical protein CNAG_01927                                        | 0 | 1 | 0 | 1 |
| CNAG_01930 | chr11 | 1294486 | 1297745 | 3259 | null | endopeptidase                                                          | 0 | 0 | 1 | 1 |
| CNAG_01934 | chr11 | 1303727 | 1305031 | 1304 | null | hypothetical protein CNAG_01934                                        | 0 | 1 | 0 | 1 |
| CNAG_01939 | chr11 | 1320732 | 1323273 | 2541 | null | hypothetical protein CNAG_01939                                        | 1 | 0 | 0 | 1 |
| CNAG_01951 | chr11 | 1349346 | 1350219 | 873  | null | small subunit ribosomal protein S22-A                                  | 0 | 2 | 0 | 2 |
| CNAG_01954 | chr11 | 1357019 | 1358251 | 1232 | null | aldo-keto reductase                                                    | 0 | 0 | 2 | 2 |
| CNAG_01955 | chr11 | 1358803 | 1360073 | 1270 | null | alcohol dehydrogenase                                                  | 1 | 0 | 0 | 1 |
| CNAG_01973 | chr11 | 1411957 | 1416172 | 4215 | null | C2H2 zinc finger protein Zas1A                                         | 1 | 0 | 0 | 1 |
| CNAG_01982 | chr11 | 1433046 | 1435425 | 2379 | null | hypothetical protein CNAG_01982                                        | 0 | 0 | 1 | 1 |
| CNAG_01985 | chr11 | 1451439 | 1453423 | 1984 | null | hypothetical protein CNAG_01985                                        | 0 | 0 | 1 | 1 |
| CNAG_01986 | chr11 | 1454419 | 1455489 | 1070 | null | hypothetical protein CNAG_01986                                        | 0 | 1 | 0 | 1 |
| CNAG_01988 | chr11 | 1460712 | 1466749 | 6037 | PHY1 | bacteriophytochrome histidine kinase                                   | 1 | 0 | 1 | 2 |
| CNAG_01992 | chr11 | 1475351 | 1478171 | 2820 | null | hypothetical protein CNAG_01992                                        | 0 | 2 | 0 | 2 |
| CNAG_01997 | chr11 | 1491668 | 1493368 | 1700 | null | prephenate dehydrogenase (NADP)                                        | 0 | 1 | 1 | 2 |
| CNAG_01999 | chr11 | 1495221 | 1495929 | 708  | null | hypothetical protein CNAG_01999                                        | 0 | 1 | 1 | 2 |
| CNAG_02001 | chr11 | 1498310 | 1503547 | 5237 | null | inositol-polyphosphate 5-phosphatase                                   | 1 | 3 | 0 | 4 |
| CNAG_02002 | chr11 | 1503793 | 1505216 | 1423 | null | hypothetical protein CNAG_02002                                        | 2 | 2 | 1 | 5 |
| CNAG_08013 | chr11 | 1505558 | 1509778 | 4220 | null | hypothetical protein CNAG_08013                                        | 4 | 1 | 2 | 7 |
| CNAG_02004 | chr11 | 1510028 | 1511243 | 1215 | null | OTU domain-containing protein 6B                                       | 0 | 2 | 0 | 2 |
| CNAG_02005 | chr11 | 1511624 | 1513041 | 1417 | null | hypothetical protein CNAG_02005                                        | 1 | 0 | 0 | 1 |
| CNAG_02007 | chr11 | 1515814 | 1517116 | 1302 | null | adenylate kinase 1                                                     | 0 | 1 | 0 | 1 |
| CNAG_02008 | chr11 | 1517678 | 1518933 | 1255 | OVA1 | nuclear protein                                                        | 1 | 0 | 0 | 1 |
| CNAG_02010 | chr11 | 1522326 | 1524376 | 2050 | null | tartrate transporter                                                   | 0 | 0 | 1 | 1 |
| CNAG_02013 | chr11 | 1530761 | 1531868 | 1107 | null | hypothetical protein CNAG_02013                                        | 0 | 2 | 0 | 2 |
| CNAG_07618 | chr11 | 1531659 | 1532438 | 779  | null | hypothetical protein CNAG_07618                                        | 1 | 1 | 0 | 2 |
| CNAG_05991 | chr12 | 22624   | 24569   | 1945 | null | glycosyl hydrolase family 88                                           | 0 | 1 | 0 | 1 |
| CNAG_05995 | chr12 | 34421   | 36635   | 2214 | null | hypothetical protein CNAG_05995                                        | 1 | 0 | 0 | 1 |
| CNAG_08014 | chr12 | 37409   | 37961   | 552  | null | hypothetical protein CNAG_08014                                        | 1 | 0 | 0 | 1 |
| CNAG_05996 | chr12 | 38318   | 41417   | 3099 | null | solute carrier family 32 (vesicular inhibitory amino acid transporter) | 0 | 0 | 1 | 1 |
| CNAG_05997 | chr12 | 42493   | 43341   | 848  | null | hypothetical protein CNAG_05997                                        | 0 | 1 | 0 | 1 |
| CNAG_05999 | chr12 | 45350   | 46323   | 973  | null | peptide alpha-N-acetyltransferase                                      | 1 | 0 | 0 | 1 |
| CNAG_06008 | chr12 | 63801   | 65178   | 1377 | null | asparaginase                                                           | 0 | 0 | 1 | 1 |
| CNAG_07896 | chr12 | 83434   | 84135   | 701  | null | hypothetical protein CNAG_07896                                        | 1 | 0 | 0 | 1 |
| CNAG_06019 | chr12 | 93824   | 99518   | 5694 | null | hypothetical protein CNAG_06019                                        | 2 | 1 | 1 | 4 |
| CNAG_06020 | chr12 | 100066  | 101803  | 1737 | null | hypothetical protein CNAG_06020                                        | 0 | 2 | 0 | 2 |
| CNAG_06024 | chr12 | 108487  | 109780  | 1293 | null | peroxin-14                                                             | 1 | 0 | 0 | 1 |
| CNAG_06027 | chr12 | 113281  | 115023  | 1742 | null | aryl-alcohol dehydrogenase                                             | 0 | 2 | 0 | 2 |
| CNAG_06032 | chr12 | 124300  | 125357  | 1057 | null | ADP-ribosylation factor-like 2                                         | 0 | 0 | 1 | 1 |
| CNAG_06033 | chr12 | 125456  | 127028  | 1572 | null | pfkB family carbohydrate kinase superfamily                            | 0 | 1 | 0 | 1 |
| CNAG_06034 | chr12 | 131492  | 133588  | 2096 | null | allantoin permease                                                     | 0 | 1 | 0 | 1 |
| CNAG_06035 | chr12 | 134325  | 135845  | 1520 | null | alcohol dehydrogenase                                                  | 0 | 7 | 1 | 8 |
| CNAG_06036 | chr12 | 136817  | 139467  | 2650 | null | hypothetical protein CNAG_06036                                        | 1 | 6 | 1 | 8 |
| CNAG_06048 | chr12 | 170774  | 171903  | 1129 | null | hypothetical protein CNAG_06048                                        | 0 | 2 | 0 | 2 |
| CNAG_06049 | chr12 | 172239  | 173254  | 1015 | null | GTP-binding protein ryh1                                               | 0 | 4 | 1 | 5 |
| CNAG_06050 | chr12 | 174931  | 176452  | 1521 | UGE2 | UDP-glucose 4-epimerase                                                | 0 | 3 | 0 | 3 |

|                   |              |               |               |             |             |                                                  |          |           |          |           |
|-------------------|--------------|---------------|---------------|-------------|-------------|--------------------------------------------------|----------|-----------|----------|-----------|
| CNAG_06055        | chr12        | 185700        | 188304        | 2604        | null        | hypothetical protein CNAG_06055                  | 0        | 1         | 0        | 1         |
| CNAG_06056        | chr12        | 189769        | 190866        | 1097        | null        | hypothetical protein CNAG_06056                  | 0        | 1         | 0        | 1         |
| CNAG_07898        | chr12        | 191256        | 192798        | 1542        | null        | hypothetical protein CNAG_07898                  | 0        | 2         | 0        | 2         |
| CNAG_06058        | chr12        | 194388        | 196624        | 2236        | null        | protein DGCR14                                   | 2        | 0         | 0        | 2         |
| CNAG_06059        | chr12        | 196765        | 197842        | 1077        | null        | cytoplasmic protein                              | 0        | 1         | 0        | 1         |
| CNAG_06063        | chr12        | 206149        | 207599        | 1450        | null        | cytochrome c oxidase assembly protein subunit 15 | 1        | 0         | 0        | 1         |
| CNAG_06064        | chr12        | 207779        | 208820        | 1041        | PTP1        | hypothetical protein CNAG_06064                  | 0        | 1         | 0        | 1         |
| CNAG_06071        | chr12        | 227453        | 228304        | 851         | null        | hypothetical protein CNAG_06071                  | 0        | 1         | 0        | 1         |
| CNAG_06072        | chr12        | 228441        | 229614        | 1173        | null        | chorismate mutase                                | 0        | 1         | 0        | 1         |
| CNAG_06075        | chr12        | 235462        | 236177        | 715         | null        | hypothetical protein CNAG_06075                  | 0        | 1         | 0        | 1         |
| CNAG_06082        | chr12        | 256216        | 257443        | 1227        | null        | delayed-type hypersensitivity antigen            | 0        | 1         | 0        | 1         |
| CNAG_06087        | chr12        | 265454        | 269164        | 3710        | null        | kinetochore protein Spc7/SPC105                  | 0        | 1         | 0        | 1         |
| CNAG_06092        | chr12        | 281878        | 283266        | 1388        | CLN1        | cyclin                                           | 1        | 0         | 0        | 1         |
| CNAG_06095        | chr12        | 293679        | 294525        | 846         | null        | large subunit ribosomal protein L13e             | 0        | 1         | 0        | 1         |
| CNAG_06101        | chr12        | 308438        | 309584        | 1146        | null        | ADP,ATP carrier protein                          | 0        | 0         | 1        | 1         |
| CNAG_06105        | chr12        | 322858        | 326030        | 3172        | null        | hypothetical protein CNAG_06105                  | 1        | 1         | 0        | 2         |
| CNAG_06107        | chr12        | 328508        | 330105        | 1597        | null        | G protein beta subunit-like                      | 0        | 1         | 0        | 1         |
| CNAG_06113        | chr12        | 345527        | 346757        | 1230        | null        | hypothetical protein CNAG_06113                  | 0        | 1         | 0        | 1         |
| CNAG_06114        | chr12        | 347461        | 348818        | 1357        | null        | rab family protein                               | 0        | 0         | 2        | 2         |
| CNAG_06115        | chr12        | 350062        | 351907        | 1845        | null        | acid phosphatase                                 | 0        | 1         | 0        | 1         |
| CNAG_08016        | chr12        | 353689        | 354468        | 779         | null        | hypothetical protein CNAG_08016                  | 0        | 1         | 0        | 1         |
| CNAG_06117        | chr12        | 354757        | 358586        | 3829        | null        | hypothetical protein CNAG_06117                  | 0        | 0         | 1        | 1         |
| CNAG_06120        | chr12        | 365657        | 366909        | 1252        | null        | cardiolipin synthase                             | 0        | 1         | 0        | 1         |
| CNAG_06122        | chr12        | 368629        | 369575        | 946         | null        | glycerol-1-phosphatase                           | 0        | 0         | 1        | 1         |
| CNAG_06125        | chr12        | 376054        | 377754        | 1700        | TEF1        | elongation factor 1-alpha                        | 0        | 0         | 1        | 1         |
| CNAG_06129        | chr12        | 383626        | 384848        | 1222        | null        | cytoplasmic protein                              | 1        | 0         | 0        | 1         |
| CNAG_06130        | chr12        | 384890        | 385925        | 1035        | null        | hypothetical protein CNAG_06130                  | 1        | 1         | 0        | 2         |
| CNAG_06131        | chr12        | 386143        | 390710        | 4567        | null        | hypothetical protein CNAG_06131                  | 1        | 0         | 1        | 2         |
| CNAG_06135        | chr12        | 397538        | 398818        | 1280        | null        | hypothetical protein CNAG_06135                  | 0        | 1         | 0        | 1         |
| CNAG_06136        | chr12        | 399076        | 403603        | 4527        | null        | hypothetical protein CNAG_06136                  | 0        | 4         | 1        | 5         |
| CNAG_06138        | chr12        | 406093        | 406768        | 675         | null        | NADH dehydrogenase (ubiquinone) Fe-S protein 6   | 1        | 0         | 0        | 1         |
| CNAG_08018        | chr12        | 421214        | 426703        | 5489        | null        | hypothetical protein CNAG_08018                  | 1        | 5         | 0        | 6         |
| CNAG_06147        | chr12        | 427010        | 427888        | 878         | null        | hypothetical protein CNAG_06147                  | 0        | 2         | 0        | 2         |
| CNAG_06148        | chr12        | 428078        | 432954        | 4876        | null        | hypothetical protein CNAG_06148                  | 1        | 1         | 8        | 10        |
| CNAG_06149        | chr12        | 433184        | 435347        | 2163        | null        | hypothetical protein CNAG_06149                  | 2        | 0         | 1        | 3         |
| CNAG_06154        | chr12        | 444338        | 446240        | 1902        | null        | cytoplasmic protein                              | 1        | 0         | 0        | 1         |
| CNAG_06156        | chr12        | 450467        | 454196        | 3729        | null        | hypothetical protein CNAG_06156                  | 0        | 1         | 0        | 1         |
| CNAG_06158        | chr12        | 458235        | 462417        | 4182        | null        | hypothetical protein CNAG_06158                  | 2        | 0         | 0        | 2         |
| CNAG_06160        | chr12        | 465158        | 469736        | 4578        | null        | guanyl nucleotide exchange factor Ssl2           | 2        | 1         | 0        | 3         |
| CNAG_06162        | chr12        | 476850        | 479021        | 2171        | null        | hypothetical protein CNAG_06162                  | 0        | 1         | 1        | 2         |
| CNAG_06163        | chr12        | 480281        | 482590        | 2309        | null        | hypothetical protein CNAG_06163                  | 0        | 3         | 0        | 3         |
| CNAG_06164        | chr12        | 482936        | 484843        | 1907        | null        | hypothetical protein CNAG_06164                  | 0        | 2         | 1        | 3         |
| CNAG_06170        | chr12        | 506561        | 507628        | 1067        | null        | S-formylglutathione hydrolase                    | 2        | 0         | 0        | 2         |
| CNAG_06172        | chr12        | 508999        | 511436        | 2437        | null        | transketolase                                    | 0        | 1         | 0        | 1         |
| CNAG_06173        | chr12        | 512228        | 513505        | 1277        | null        | hypothetical protein CNAG_06173                  | 1        | 1         | 0        | 2         |
| CNAG_06174        | chr12        | 513784        | 520391        | 6607        | null        | PEK/GCN2 protein kinase                          | 2        | 0         | 1        | 3         |
| <b>CNAG_06175</b> | <b>chr12</b> | <b>520646</b> | <b>524049</b> | <b>3403</b> | <b>null</b> | <b>26S proteasome regulatory subunit N2</b>      | <b>0</b> | <b>10</b> | <b>1</b> | <b>11</b> |

|                   |              |               |               |             |             |                                                                 |          |          |          |          |
|-------------------|--------------|---------------|---------------|-------------|-------------|-----------------------------------------------------------------|----------|----------|----------|----------|
| CNAG_07908        | chr12        | 524967        | 527499        | 2532        | null        | aconitate hydratase, mitochondrial                              | 1        | 1        | 0        | 2        |
| CNAG_07909        | chr12        | 527878        | 529784        | 1906        | null        | meiotic recombinase Dmc1                                        | 0        | 2        | 0        | 2        |
| CNAG_06178        | chr12        | 530239        | 535005        | 4766        | null        | hypothetical protein CNAG_06178                                 | 0        | 1        | 0        | 1        |
| CNAG_07910        | chr12        | 545342        | 545815        | 473         | null        | hypothetical protein CNAG_07910                                 | 2        | 2        | 0        | 4        |
| CNAG_06183        | chr12        | 546566        | 549439        | 2873        | null        | origin recognition complex subunit 4                            | 0        | 1        | 2        | 3        |
| CNAG_06184        | chr12        | 549827        | 551970        | 2143        | null        | hypothetical protein CNAG_06184                                 | 0        | 1        | 0        | 1        |
| CNAG_06185        | chr12        | 552437        | 553559        | 1122        | null        | hypothetical protein CNAG_06185                                 | 0        | 1        | 1        | 2        |
| CNAG_06188        | chr12        | 560605        | 564086        | 3481        | null        | hypothetical protein CNAG_06188                                 | 0        | 0        | 1        | 1        |
| CNAG_06189        | chr12        | 564810        | 565394        | 584         | null        | hypothetical protein CNAG_06189                                 | 1        | 0        | 0        | 1        |
| CNAG_06192        | chr12        | 570825        | 576013        | 5188        | null        | hypothetical protein CNAG_06192                                 | 1        | 0        | 1        | 2        |
| CNAG_06194        | chr12        | 584297        | 585776        | 1479        | null        | hypothetical protein CNAG_06194                                 | 1        | 2        | 0        | 3        |
| CNAG_06195        | chr12        | 585940        | 587277        | 1337        | null        | hypothetical protein CNAG_06195                                 | 0        | 2        | 1        | 3        |
| CNAG_06197        | chr12        | 589118        | 592431        | 3313        | null        | hypothetical protein CNAG_06197                                 | 1        | 0        | 0        | 1        |
| CNAG_06199        | chr12        | 594613        | 599808        | 5195        | null        | nuclear DNA helicase II                                         | 2        | 0        | 1        | 3        |
| CNAG_06200        | chr12        | 600122        | 601651        | 1529        | null        | hypothetical protein CNAG_06200                                 | 0        | 4        | 0        | 4        |
| CNAG_06202        | chr12        | 605702        | 607346        | 1644        | null        | hypothetical protein CNAG_06202                                 | 1        | 2        | 0        | 3        |
| <b>CNAG_06203</b> | <b>chr12</b> | <b>614081</b> | <b>616896</b> | <b>2815</b> | <b>MAT2</b> | <b>hypothetical protein CNAG_06203</b>                          | <b>1</b> | <b>0</b> | <b>0</b> | <b>1</b> |
| CNAG_06205        | chr12        | 621585        | 623141        | 1556        | BLP3        | hypothetical protein CNAG_06205                                 | 2        | 2        | 0        | 4        |
| CNAG_06206        | chr12        | 623871        | 625945        | 2074        | null        | ATP-dependent RNA helicase DBP9                                 | 0        | 0        | 1        | 1        |
| CNAG_06209        | chr12        | 634288        | 636211        | 1923        | null        | hypothetical protein CNAG_06209                                 | 0        | 1        | 0        | 1        |
| CNAG_07912        | chr12        | 636724        | 637155        | 431         | null        | hypothetical protein CNAG_07912                                 | 0        | 1        | 0        | 1        |
| CNAG_06221        | chr12        | 664636        | 666603        | 1967        | null        | diphthamide biosynthesis protein 2                              | 0        | 1        | 0        | 1        |
| CNAG_06228        | chr12        | 683316        | 686592        | 3276        | null        | MIF4G/MA4 domain-containing protein                             | 0        | 2        | 0        | 2        |
| CNAG_06229        | chr12        | 686899        | 687859        | 960         | null        | hypothetical protein CNAG_06229                                 | 0        | 2        | 0        | 2        |
| CNAG_06230        | chr12        | 688602        | 690621        | 2019        | null        | hypothetical protein CNAG_06230                                 | 1        | 10       | 0        | 11       |
| CNAG_06232        | chr12        | 693665        | 694979        | 1314        | null        | transcription factor C subunit 7                                | 0        | 4        | 0        | 4        |
| CNAG_06233        | chr12        | 696087        | 696959        | 872         | null        | hypothetical protein CNAG_06233                                 | 0        | 1        | 0        | 1        |
| CNAG_06234        | chr12        | 697249        | 697698        | 449         | null        | hypothetical protein CNAG_06234                                 | 2        | 0        | 0        | 2        |
| CNAG_06235        | chr12        | 698588        | 700084        | 1496        | null        | hypothetical protein CNAG_06235                                 | 0        | 1        | 0        | 1        |
| CNAG_06236        | chr12        | 700610        | 702635        | 2025        | null        | RNA exonuclease NGL2                                            | 0        | 1        | 2        | 3        |
| CNAG_06237        | chr12        | 702927        | 704044        | 1117        | null        | YeeE/YedE family protein                                        | 1        | 0        | 2        | 3        |
| CNAG_06238        | chr12        | 704184        | 705405        | 1221        | null        | glutathione S-transferase                                       | 1        | 2        | 0        | 3        |
| CNAG_06239        | chr12        | 706370        | 708263        | 1893        | null        | hypothetical protein CNAG_06239                                 | 6        | 0        | 2        | 8        |
| CNAG_06241        | chr12        | 710724        | 713329        | 2605        | CFO1        | acidic laccase                                                  | 0        | 3        | 0        | 3        |
| CNAG_06243        | chr12        | 717336        | 718953        | 1617        | null        | hypothetical protein CNAG_06243                                 | 0        | 0        | 1        | 1        |
| CNAG_06244        | chr12        | 719455        | 721996        | 2541        | null        | hypothetical protein CNAG_06244                                 | 2        | 0        | 0        | 2        |
| CNAG_06246        | chr12        | 723621        | 724740        | 1119        | null        | hypothetical protein CNAG_06246                                 | 0        | 1        | 0        | 1        |
| CNAG_06247        | chr12        | 726406        | 729345        | 2939        | null        | hypothetical protein CNAG_06247                                 | 1        | 0        | 0        | 1        |
| CNAG_06248        | chr12        | 729800        | 734579        | 4779        | null        | protein TIF31                                                   | 0        | 8        | 1        | 9        |
| CNAG_06249        | chr12        | 737769        | 739439        | 1670        | null        | taurine catabolism dioxygenase TauD                             | 1        | 0        | 0        | 1        |
| CNAG_06250        | chr12        | 740300        | 742398        | 2098        | null        | hypothetical protein CNAG_06250                                 | 0        | 1        | 0        | 1        |
| CNAG_06252        | chr12        | 746822        | 749259        | 2437        | null        | hypothetical protein CNAG_06252                                 | 1        | 0        | 0        | 1        |
| CNAG_06253        | chr12        | 750942        | 753314        | 2372        | null        | sugar transporter                                               | 0        | 1        | 0        | 1        |
| CNAG_06259        | chr13        | 12544         | 14859         | 2315        | null        | MFS transporter, SP family, general alpha glucoside:H symporter | 1        | 0        | 0        | 1        |
| CNAG_06260        | chr13        | 17420         | 19723         | 2303        | null        | alpha-glucosidase                                               | 1        | 0        | 0        | 1        |
| CNAG_07922        | chr13        | 26005         | 28148         | 2143        | null        | transcription factor                                            | 0        | 1        | 0        | 1        |
| CNAG_06271        | chr13        | 51440         | 52740         | 1300        | null        | hypothetical protein CNAG_06271                                 | 1        | 1        | 0        | 2        |



|            |       |        |        |      |        |                                                           |   |   |   |   |
|------------|-------|--------|--------|------|--------|-----------------------------------------------------------|---|---|---|---|
| CNAG_06281 | chr13 | 84222  | 85181  | 959  | null   | hypothetical protein CNAG_06281                           | 1 | 0 | 0 | 1 |
| CNAG_06282 | chr13 | 85832  | 90001  | 4169 | null   | WD-repeat protein 48                                      | 0 | 0 | 1 | 1 |
| CNAG_06296 | chr13 | 121177 | 121763 | 586  | null   | hypothetical protein CNAG_06296                           | 0 | 1 | 0 | 1 |
| CNAG_06299 | chr13 | 126116 | 128221 | 2105 | null   | hypothetical protein CNAG_06299                           | 1 | 0 | 2 | 3 |
| CNAG_06301 | chr13 | 133897 | 136742 | 2845 | SCH9   | AGC/Akt protein kinase                                    | 0 | 2 | 0 | 2 |
| CNAG_07931 | chr13 | 144516 | 145156 | 640  | null   | hypothetical protein CNAG_07931                           | 1 | 0 | 0 | 1 |
| CNAG_06321 | chr13 | 183500 | 184622 | 1122 | null   | hypothetical protein CNAG_06321                           | 0 | 3 | 0 | 3 |
| CNAG_06325 | chr13 | 193650 | 196881 | 3231 | null   | GTPase activator                                          | 0 | 1 | 0 | 1 |
| CNAG_06329 | chr13 | 205993 | 208048 | 2055 | null   | high-affinity nicotinic acid transporter                  | 0 | 0 | 1 | 1 |
| CNAG_06332 | chr13 | 213774 | 217238 | 3464 | null   | hypothetical protein CNAG_06332                           | 1 | 0 | 0 | 1 |
| CNAG_06333 | chr13 | 217573 | 219499 | 1926 | null   | replication factor C subunit 3/5                          | 0 | 1 | 0 | 1 |
| CNAG_06337 | chr13 | 229945 | 231437 | 1492 | null   | hypothetical protein CNAG_06337                           | 0 | 1 | 0 | 1 |
| CNAG_06338 | chr13 | 234722 | 239916 | 5194 | null   | ABC transporter PMR5                                      | 1 | 0 | 1 | 2 |
| CNAG_06339 | chr13 | 241189 | 243911 | 2722 | null   | hypothetical protein CNAG_06339                           | 1 | 1 | 0 | 2 |
| CNAG_06340 | chr13 | 244718 | 246098 | 1380 | null   | pre-rRNA-processing protein TSR4                          | 0 | 0 | 1 | 1 |
| CNAG_06341 | chr13 | 246366 | 247375 | 1009 | null   | hypothetical protein CNAG_06341                           | 1 | 0 | 0 | 1 |
| CNAG_06344 | chr13 | 250615 | 251145 | 530  | null   | hypothetical protein CNAG_06344                           | 0 | 1 | 0 | 1 |
| CNAG_06347 | chr13 | 258885 | 259378 | 493  | BLP2   | hypothetical protein CNAG_06347                           | 0 | 1 | 0 | 1 |
| CNAG_06348 | chr13 | 261276 | 266510 | 5234 | PDR5-3 | ABC transporter PMR5                                      | 0 | 2 | 0 | 2 |
| CNAG_06349 | chr13 | 267898 | 269044 | 1146 | null   | hypothetical protein CNAG_06349                           | 0 | 1 | 0 | 1 |
| CNAG_06350 | chr13 | 269171 | 270980 | 1809 | null   | hypothetical protein CNAG_06350                           | 1 | 0 | 0 | 1 |
| CNAG_06352 | chr13 | 272335 | 275773 | 3438 | null   | hypothetical protein CNAG_06352                           | 1 | 0 | 0 | 1 |
| CNAG_06354 | chr13 | 278701 | 280533 | 1832 | null   | hypothetical protein CNAG_06354                           | 1 | 1 | 0 | 2 |
| CNAG_06361 | chr13 | 291146 | 292961 | 1815 | null   | 26S proteasome regulatory subunit N6                      | 0 | 1 | 0 | 1 |
| CNAG_06362 | chr13 | 293389 | 301614 | 8225 | null   | hypothetical protein CNAG_06362                           | 1 | 0 | 0 | 1 |
| CNAG_06365 | chr13 | 307832 | 308914 | 1082 | null   | derlin-2/3                                                | 0 | 2 | 0 | 2 |
| CNAG_06368 | chr13 | 313556 | 314828 | 1272 | null   | hypothetical protein CNAG_06368                           | 0 | 1 | 0 | 1 |
| CNAG_06379 | chr13 | 335174 | 338668 | 3494 | null   | N-acetyltransferase 10                                    | 0 | 1 | 0 | 1 |
| CNAG_06381 | chr13 | 340858 | 343701 | 2843 | null   | hypothetical protein CNAG_06381                           | 2 | 1 | 0 | 3 |
| CNAG_06385 | chr13 | 354340 | 355024 | 684  | null   | GAF domain-containing protein                             | 0 | 1 | 0 | 1 |
| CNAG_06388 | chr13 | 360543 | 360985 | 442  | null   | hypothetical protein CNAG_06388                           | 0 | 1 | 0 | 1 |
| CNAG_06389 | chr13 | 362681 | 363843 | 1162 | null   | hypothetical protein CNAG_06389                           | 0 | 2 | 1 | 3 |
| CNAG_06390 | chr13 | 364292 | 366348 | 2056 | null   | hypothetical protein CNAG_06390                           | 0 | 0 | 1 | 1 |
| CNAG_07936 | chr13 | 375991 | 384869 | 8878 | null   | hypothetical protein CNAG_07936                           | 0 | 0 | 1 | 1 |
| CNAG_06400 | chr13 | 387802 | 391181 | 3379 | PMA1   | plasma-membrane proton-efflux P-type ATPase               | 0 | 1 | 0 | 1 |
| CNAG_06402 | chr13 | 398850 | 399326 | 476  | null   | 26S proteasome complex subunit DSS1                       | 0 | 1 | 0 | 1 |
| CNAG_06404 | chr13 | 402860 | 403241 | 381  | null   | hypothetical protein CNAG_06404                           | 0 | 1 | 0 | 1 |
| CNAG_06405 | chr13 | 405564 | 407334 | 1770 | null   | hypothetical protein CNAG_06405                           | 1 | 0 | 0 | 1 |
| CNAG_06410 | chr13 | 413082 | 414016 | 934  | null   | ATP-dependent Clp endopeptidase, proteolytic subunit ClpP | 0 | 0 | 1 | 1 |
| CNAG_06411 | chr13 | 414440 | 416491 | 2051 | null   | mutanase                                                  | 1 | 1 | 0 | 2 |
| CNAG_06412 | chr13 | 416755 | 417850 | 1095 | null   | rRNA-processing protein EFG1                              | 1 | 1 | 0 | 2 |
| CNAG_06413 | chr13 | 419158 | 419933 | 775  | null   | hypothetical protein CNAG_06413                           | 0 | 1 | 0 | 1 |
| CNAG_06416 | chr13 | 425147 | 428601 | 3454 | DAP2   | dipeptidyl aminopeptidase                                 | 0 | 0 | 1 | 1 |
| CNAG_06427 | chr13 | 447112 | 449090 | 1978 | null   | hypothetical protein CNAG_06427                           | 0 | 0 | 1 | 1 |
| CNAG_07937 | chr13 | 452266 | 455538 | 3272 | CAS1   | O-acetyltransferase                                       | 1 | 0 | 0 | 1 |
| CNAG_07938 | chr13 | 455840 | 463336 | 7496 | null   | hypothetical protein CNAG_07938                           | 0 | 0 | 1 | 1 |
| CNAG_06431 | chr13 | 463486 | 465222 | 1736 | null   | acyl-CoA oxidase                                          | 0 | 1 | 0 | 1 |

|            |       |        |        |      |      |                                     |   |   |   |   |
|------------|-------|--------|--------|------|------|-------------------------------------|---|---|---|---|
| CNAG_06432 | chr13 | 465694 | 467354 | 1660 | null | acetate kinase                      | 0 | 0 | 1 | 1 |
| CNAG_06433 | chr13 | 468088 | 470394 | 2306 | null | AMP-binding protein                 | 0 | 0 | 2 | 2 |
| CNAG_07939 | chr13 | 472094 | 472410 | 316  | null | hypothetical protein CNAG_07939     | 0 | 3 | 0 | 3 |
| CNAG_06435 | chr13 | 477119 | 480564 | 3445 | null | hypothetical protein CNAG_06435     | 0 | 2 | 0 | 2 |
| CNAG_06437 | chr13 | 481411 | 482223 | 812  | null | hypothetical protein CNAG_06437     | 0 | 1 | 0 | 1 |
| CNAG_06443 | chr13 | 499184 | 501752 | 2568 | SSA1 | glucose-regulated protein           | 0 | 0 | 1 | 1 |
| CNAG_06445 | chr13 | 503610 | 505125 | 1515 | null | CMGC/CDK/CDK7 protein kinase        | 0 | 0 | 1 | 1 |
| CNAG_06447 | chr13 | 508573 | 509459 | 886  | null | large subunit ribosomal protein L22 | 0 | 1 | 0 | 1 |
| CNAG_06448 | chr13 | 509976 | 511615 | 1639 | null | cystathionine gamma-lyase           | 1 | 0 | 1 | 2 |
| CNAG_06449 | chr13 | 512372 | 514650 | 2278 | null | hypothetical protein CNAG_06449     | 2 | 2 | 0 | 4 |
| CNAG_06451 | chr13 | 519348 | 520000 | 652  | null | hypothetical protein CNAG_06451     | 0 | 1 | 0 | 1 |
| CNAG_06452 | chr13 | 520342 | 521995 | 1653 | null | integral membrane protein           | 0 | 1 | 0 | 1 |
| CNAG_06454 | chr13 | 524184 | 526421 | 2237 | null | Atypical/RIO/RIO1 protein kinase    | 1 | 0 | 0 | 1 |
| CNAG_07941 | chr13 | 531153 | 533674 | 2521 | null | hypothetical protein CNAG_07941     | 0 | 1 | 0 | 1 |
| CNAG_06460 | chr13 | 538552 | 540408 | 1856 | null | hypothetical protein CNAG_06460     | 0 | 0 | 1 | 1 |
| CNAG_07942 | chr13 | 541373 | 545785 | 4412 | null | cell division control protein 25    | 1 | 1 | 1 | 3 |
| CNAG_06465 | chr13 | 549224 | 550954 | 1730 | null | transcription regulator             | 0 | 0 | 1 | 1 |
| CNAG_06466 | chr13 | 551123 | 552840 | 1717 | null | jumonji domain containing 5         | 0 | 1 | 0 | 1 |
| CNAG_06472 | chr13 | 565251 | 568581 | 3330 | null | nucleolar protein 4                 | 1 | 0 | 0 | 1 |
| CNAG_06474 | chr13 | 573397 | 575577 | 2180 | null | RNA-binding protein Musashi         | 0 | 0 | 1 | 1 |
| CNAG_06475 | chr13 | 576327 | 579391 | 3064 | null | hypothetical protein CNAG_06475     | 0 | 3 | 0 | 3 |
| CNAG_06483 | chr13 | 634761 | 637339 | 2578 | null | hypothetical protein CNAG_06483     | 0 | 4 | 0 | 4 |
| CNAG_06484 | chr13 | 637421 | 638929 | 1508 | null | hypothetical protein CNAG_06484     | 0 | 1 | 0 | 1 |
| CNAG_06486 | chr13 | 642466 | 644773 | 2307 | null | hypothetical protein CNAG_06486     | 1 | 3 | 0 | 4 |
| CNAG_06490 | chr13 | 653089 | 657988 | 4899 | null | CAMK/CAMKL protein kinase           | 1 | 2 | 1 | 4 |
| CNAG_06492 | chr13 | 660061 | 661380 | 1319 | null | cytoplasmic protein                 | 0 | 1 | 0 | 1 |
| CNAG_06505 | chr13 | 694763 | 696493 | 1730 | null | hypothetical protein CNAG_06505     | 0 | 0 | 1 | 1 |
| CNAG_06511 | chr13 | 711860 | 713695 | 1835 | null | hypothetical protein CNAG_06511     | 0 | 1 | 0 | 1 |
| CNAG_07944 | chr13 | 716491 | 721044 | 4553 | null | urea carboxylase                    | 2 | 1 | 0 | 3 |
| CNAG_06518 | chr13 | 732275 | 732934 | 659  | null | hypothetical protein CNAG_06518     | 0 | 3 | 0 | 3 |
| CNAG_05333 | chr14 | 2566   | 5152   | 2586 | null | hypothetical protein CNAG_05333     | 1 | 1 | 0 | 2 |
| CNAG_05334 | chr14 | 6952   | 8084   | 1132 | null | hypothetical protein CNAG_05334     | 1 | 2 | 0 | 3 |
| CNAG_05336 | chr14 | 9303   | 11536  | 2233 | null | glucose transporter                 | 0 | 3 | 1 | 4 |
| CNAG_05338 | chr14 | 15460  | 16141  | 681  | null | hypothetical protein CNAG_05338     | 0 | 1 | 0 | 1 |
| CNAG_05341 | chr14 | 23769  | 25696  | 1927 | null | hypothetical protein CNAG_05341     | 0 | 3 | 0 | 3 |
| CNAG_05342 | chr14 | 26659  | 27699  | 1040 | null | hypothetical protein CNAG_05342     | 1 | 0 | 1 | 2 |
| CNAG_05343 | chr14 | 29424  | 34237  | 4813 | null | hypothetical protein CNAG_05343     | 1 | 0 | 1 | 2 |
| CNAG_05344 | chr14 | 34892  | 38774  | 3882 | null | hemolysin                           | 0 | 1 | 0 | 1 |
| CNAG_05345 | chr14 | 39608  | 41860  | 2252 | null | amino acid transporter              | 0 | 1 | 0 | 1 |
| CNAG_05346 | chr14 | 42476  | 43972  | 1496 | null | sarcosine oxidase                   | 0 | 0 | 1 | 1 |
| CNAG_07869 | chr14 | 46321  | 48236  | 1915 | null | hypothetical protein CNAG_07869     | 0 | 0 | 1 | 1 |
| CNAG_07033 | chr14 | 50267  | 51525  | 1258 | null | hypothetical protein CNAG_07033     | 0 | 0 | 1 | 1 |
| CNAG_05349 | chr14 | 54923  | 59328  | 4405 | null | hypothetical protein CNAG_05349     | 0 | 1 | 0 | 1 |
| CNAG_05352 | chr14 | 66641  | 68828  | 2187 | null | acetyl-CoA transporter              | 1 | 0 | 0 | 1 |
| CNAG_05353 | chr14 | 68991  | 73809  | 4818 | null | nuclear pore complex protein Nup133 | 1 | 0 | 0 | 1 |
| CNAG_05360 | chr14 | 89594  | 92207  | 2613 | null | ATP-dependent RNA helicase MAK5     | 0 | 0 | 2 | 2 |
| CNAG_05369 | chr14 | 114242 | 117097 | 2855 | null | beta-glucosidase                    | 0 | 1 | 0 | 1 |

|                   |              |               |               |             |             |                                                                                           |          |           |          |           |
|-------------------|--------------|---------------|---------------|-------------|-------------|-------------------------------------------------------------------------------------------|----------|-----------|----------|-----------|
| CNAG_05371        | chr14        | 119005        | 121692        | 2687        | null        | hypothetical protein CNAG_05371                                                           | 1        | 0         | 0        | 1         |
| CNAG_05372        | chr14        | 122360        | 123625        | 1265        | BLP5        | B2-aldehyde-forming enzyme                                                                | 0        | 2         | 0        | 2         |
| CNAG_05373        | chr14        | 124230        | 125858        | 1628        | null        | elongator complex protein 4                                                               | 1        | 0         | 0        | 1         |
| CNAG_05374        | chr14        | 126153        | 129432        | 3279        | null        | chromosome transmission fidelity protein 18                                               | 0        | 0         | 1        | 1         |
| <b>CNAG_05375</b> | <b>chr14</b> | <b>133828</b> | <b>135128</b> | <b>1300</b> | <b>null</b> | <b>hypothetical protein CNAG_05375</b>                                                    | <b>1</b> | <b>10</b> | <b>2</b> | <b>13</b> |
| CNAG_05377        | chr14        | 138145        | 140359        | 2214        | ITR3        | MFS transporter, SP family, solute carrier family 2 (myo-inositol transporter), member 13 | 0        | 2         | 0        | 2         |
| CNAG_05378        | chr14        | 141431        | 142546        | 1115        | null        | 3-hydroxyacyl-CoA dehydrogenase                                                           | 0        | 1         | 0        | 1         |
| CNAG_05379        | chr14        | 143093        | 144297        | 1204        | null        | regucalcin                                                                                | 0        | 2         | 0        | 2         |
| CNAG_05380        | chr14        | 144801        | 148667        | 3866        | null        | hypothetical protein CNAG_05380                                                           | 0        | 0         | 1        | 1         |
| CNAG_05381        | chr14        | 149570        | 151758        | 2188        | ITR3C       | MFS transporter, SP family, solute carrier family 2 (myo-inositol transporter), member 13 | 1        | 4         | 1        | 6         |
| CNAG_07874        | chr14        | 156158        | 158302        | 2144        | null        | sugar transporter                                                                         | 0        | 1         | 0        | 1         |
| CNAG_05383        | chr14        | 159780        | 161240        | 1460        | null        | hypothetical protein CNAG_05383                                                           | 0        | 1         | 1        | 2         |
| CNAG_05387        | chr14        | 172703        | 174850        | 2147        | null        | galactose transporter                                                                     | 0        | 3         | 0        | 3         |
| CNAG_05390        | chr14        | 182619        | 183721        | 1102        | null        | hypothetical protein CNAG_05390                                                           | 0        | 0         | 1        | 1         |
| CNAG_05393        | chr14        | 192619        | 195143        | 2524        | null        | ATPase                                                                                    | 0        | 0         | 1        | 1         |
| CNAG_05395        | chr14        | 198991        | 202766        | 3775        | VAM6        | hypothetical protein CNAG_05395                                                           | 2        | 1         | 2        | 5         |
| CNAG_07875        | chr14        | 202785        | 203202        | 417         | null        | hypothetical protein CNAG_07875                                                           | 0        | 1         | 0        | 1         |
| CNAG_05396        | chr14        | 203661        | 204639        | 978         | null        | LRP16 family protein                                                                      | 1        | 0         | 0        | 1         |
| CNAG_05401        | chr14        | 212012        | 214552        | 2540        | null        | hypothetical protein CNAG_05401                                                           | 0        | 0         | 1        | 1         |
| CNAG_05416        | chr14        | 250965        | 252927        | 1962        | null        | pre-mRNA-processing protein 45                                                            | 0        | 1         | 0        | 1         |
| CNAG_08023        | chr14        | 253205        | 257719        | 4514        | null        | hypothetical protein CNAG_08023                                                           | 0        | 0         | 1        | 1         |
| CNAG_05419        | chr14        | 258430        | 260581        | 2151        | null        | hypothetical protein CNAG_05419                                                           | 1        | 0         | 1        | 2         |
| CNAG_05420        | chr14        | 261459        | 263499        | 2040        | null        | RNA polymerase II transcription factor                                                    | 0        | 2         | 0        | 2         |
| CNAG_05428        | chr14        | 288275        | 291148        | 2873        | TAF5        | transcription initiation factor TFIID subunit 5                                           | 0        | 0         | 3        | 3         |
| CNAG_05430        | chr14        | 293442        | 294756        | 1314        | null        | hypothetical protein CNAG_05430                                                           | 0        | 0         | 1        | 1         |
| CNAG_05431        | chr14        | 295214        | 298064        | 2850        | RIM101      | pH-response transcription factor pacC/RIM101                                              | 0        | 2         | 0        | 2         |
| CNAG_05435        | chr14        | 305603        | 307291        | 1688        | null        | hypothetical protein CNAG_05435                                                           | 1        | 0         | 0        | 1         |
| CNAG_05439        | chr14        | 312138        | 313974        | 1836        | null        | CAMK/CAMK1/CAMK1-CMK protein kinase                                                       | 0        | 1         | 0        | 1         |
| CNAG_05440        | chr14        | 315895        | 316752        | 857         | null        | pyridoxamine 5'-phosphate oxidase                                                         | 0        | 1         | 0        | 1         |
| CNAG_05441        | chr14        | 317429        | 319537        | 2108        | null        | lipid particle protein                                                                    | 0        | 2         | 1        | 3         |
| CNAG_05443        | chr14        | 321800        | 324154        | 2354        | null        | hypothetical protein CNAG_05443                                                           | 0        | 0         | 1        | 1         |
| CNAG_05445        | chr14        | 329263        | 331675        | 2412        | null        | smooth muscle cell associated protein-1 isoform 2                                         | 1        | 1         | 0        | 2         |
| CNAG_07876        | chr14        | 339489        | 340119        | 630         | null        | hypothetical protein CNAG_07876                                                           | 0        | 1         | 0        | 1         |
| CNAG_05451        | chr14        | 344936        | 345685        | 749         | null        | hypothetical protein CNAG_05451                                                           | 0        | 3         | 0        | 3         |
| <b>CNAG_05452</b> | <b>chr14</b> | <b>346448</b> | <b>349039</b> | <b>2591</b> | <b>null</b> | <b>hypothetical protein CNAG_05452</b>                                                    | <b>1</b> | <b>10</b> | <b>1</b> | <b>12</b> |
| CNAG_05453        | chr14        | 350156        | 350473        | 317         | null        | hypothetical protein CNAG_05453                                                           | 0        | 4         | 0        | 4         |
| CNAG_05454        | chr14        | 351626        | 353014        | 1388        | null        | hypothetical protein CNAG_05454                                                           | 0        | 1         | 0        | 1         |
| CNAG_05455        | chr14        | 355010        | 355872        | 862         | null        | translation initiation factor eIF-1A                                                      | 0        | 1         | 0        | 1         |
| CNAG_05457        | chr14        | 358117        | 362715        | 4598        | null        | pentatricopeptide repeat protein                                                          | 1        | 0         | 0        | 1         |
| CNAG_05458        | chr14        | 363830        | 365248        | 1418        | null        | endo-1,3(4)-beta-glucanase                                                                | 0        | 1         | 0        | 1         |
| CNAG_05460        | chr14        | 369675        | 370899        | 1224        | null        | 2-dehydropantoate 2-reductase                                                             | 0        | 1         | 0        | 1         |
| CNAG_05463        | chr14        | 376143        | 378108        | 1965        | null        | hypothetical protein CNAG_05463                                                           | 0        | 1         | 1        | 2         |
| CNAG_08025        | chr14        | 380847        | 381479        | 632         | null        | hypothetical protein CNAG_08025                                                           | 1        | 0         | 0        | 1         |
| CNAG_05466        | chr14        | 381746        | 383395        | 1649        | null        | hypothetical protein CNAG_05466                                                           | 1        | 0         | 1        | 2         |
| CNAG_05468        | chr14        | 385391        | 387151        | 1760        | null        | AP endonuclease 1                                                                         | 1        | 0         | 0        | 1         |
| CNAG_05469        | chr14        | 387487        | 390094        | 2607        | HRD1        | E3 ubiquitin-protein ligase synoviolin                                                    | 0        | 2         | 0        | 2         |
| CNAG_05471        | chr14        | 396698        | 400835        | 4137        | null        | alpha-glucosidase                                                                         | 0        | 1         | 0        | 1         |

|            |       |        |        |      |      |                                              |   |   |   |   |
|------------|-------|--------|--------|------|------|----------------------------------------------|---|---|---|---|
| CNAG_05473 | chr14 | 407647 | 408596 | 949  | null | hypothetical protein CNAG_05473              | 0 | 0 | 1 | 1 |
| CNAG_07879 | chr14 | 409483 | 411079 | 1596 | null | TRIAD3, E3 ubiquitin-protein ligase RNF216   | 0 | 1 | 0 | 1 |
| CNAG_05476 | chr14 | 414099 | 414767 | 668  | null | hypothetical protein CNAG_05476              | 0 | 3 | 0 | 3 |
| CNAG_05477 | chr14 | 415120 | 417522 | 2402 | null | protein disulfide-isomerase                  | 0 | 5 | 0 | 5 |
| CNAG_05478 | chr14 | 417866 | 418976 | 1110 | null | charged multivesicular body protein 2A       | 1 | 0 | 0 | 1 |
| CNAG_05479 | chr14 | 420406 | 424320 | 3914 | null | hypothetical protein CNAG_05479              | 0 | 2 | 0 | 2 |
| CNAG_05480 | chr14 | 424641 | 427248 | 2607 | HXK1 | hexokinase                                   | 0 | 1 | 4 | 5 |
| CNAG_07881 | chr14 | 430064 | 430500 | 436  | null | hypothetical protein CNAG_07881              | 0 | 1 | 1 | 2 |
| CNAG_05482 | chr14 | 430612 | 431888 | 1276 | null | hypothetical protein CNAG_05482              | 0 | 1 | 0 | 1 |
| CNAG_05484 | chr14 | 433124 | 435547 | 2423 | null | CAMKK/CAMKK-META protein kinase              | 1 | 0 | 0 | 1 |
| CNAG_05486 | chr14 | 437892 | 441787 | 3895 | null | hypothetical protein CNAG_05486              | 0 | 2 | 0 | 2 |
| CNAG_08026 | chr14 | 472367 | 472736 | 369  | null | hypothetical protein CNAG_08026              | 0 | 1 | 0 | 1 |
| CNAG_05497 | chr14 | 481110 | 483283 | 2173 | null | dihydroxy-acid dehydratase                   | 0 | 1 | 0 | 1 |
| CNAG_05499 | chr14 | 485991 | 487179 | 1188 | null | SHO1 osmosensor                              | 1 | 0 | 0 | 1 |
| CNAG_05500 | chr14 | 487625 | 489085 | 1460 | null | hypothetical protein CNAG_05500              | 1 | 0 | 0 | 1 |
| CNAG_05501 | chr14 | 489206 | 490098 | 892  | null | hypothetical protein CNAG_05501              | 0 | 1 | 0 | 1 |
| CNAG_05502 | chr14 | 491447 | 493566 | 2119 | null | hypothetical protein CNAG_05502              | 1 | 1 | 0 | 2 |
| CNAG_05503 | chr14 | 493855 | 495881 | 2026 | null | LIM domain-containing protein                | 0 | 1 | 0 | 1 |
| CNAG_07883 | chr14 | 498870 | 500936 | 2066 | null | hypothetical protein CNAG_07883              | 0 | 3 | 0 | 3 |
| CNAG_07884 | chr14 | 501182 | 502485 | 1303 | null | hypothetical protein CNAG_07884              | 0 | 1 | 0 | 1 |
| CNAG_05508 | chr14 | 503394 | 506151 | 2757 | null | hypothetical protein CNAG_05508              | 0 | 2 | 0 | 2 |
| CNAG_05510 | chr14 | 507758 | 508627 | 869  | null | hypothetical protein CNAG_05510              | 0 | 1 | 0 | 1 |
| CNAG_05512 | chr14 | 512789 | 515087 | 2298 | null | hypothetical protein CNAG_05512              | 1 | 0 | 0 | 1 |
| CNAG_05513 | chr14 | 515548 | 516461 | 913  | null | septum-promoting GTP-binding protein 1       | 0 | 3 | 0 | 3 |
| CNAG_05517 | chr14 | 525447 | 528333 | 2886 | null | solute carrier family 45, member 1/2/4       | 0 | 1 | 0 | 1 |
| CNAG_05518 | chr14 | 528483 | 533310 | 4827 | null | exocyst complex component 4, partial         | 1 | 1 | 0 | 2 |
| CNAG_05519 | chr14 | 534120 | 537106 | 2986 | null | hypothetical protein CNAG_05519              | 0 | 1 | 0 | 1 |
| CNAG_05521 | chr14 | 541591 | 542770 | 1179 | null | aldose reductase                             | 0 | 1 | 0 | 1 |
| CNAG_05525 | chr14 | 553983 | 554682 | 699  | null | small subunit ribosomal protein S26          | 1 | 0 | 0 | 1 |
| CNAG_05527 | chr14 | 556744 | 563672 | 6928 | null | senataxin                                    | 0 | 0 | 1 | 1 |
| CNAG_05529 | chr14 | 567651 | 569731 | 2080 | null | hypothetical protein CNAG_05529              | 0 | 1 | 0 | 1 |
| CNAG_05530 | chr14 | 569925 | 570587 | 662  | null | hypothetical protein CNAG_05530              | 0 | 2 | 0 | 2 |
| CNAG_05534 | chr14 | 578651 | 579995 | 1344 | PLR1 | pyridoxal reductase                          | 0 | 1 | 0 | 1 |
| CNAG_05549 | chr14 | 613857 | 617209 | 3352 | null | CMGC/CDK protein kinase                      | 1 | 0 | 0 | 1 |
| CNAG_08027 | chr14 | 647870 | 649385 | 1515 | null | hypothetical protein CNAG_08027              | 0 | 1 | 0 | 1 |
| CNAG_05565 | chr14 | 657005 | 659158 | 2153 | null | hypothetical protein CNAG_05565              | 1 | 0 | 0 | 1 |
| CNAG_05568 | chr14 | 662178 | 663454 | 1276 | null | septum formation protein Maf                 | 0 | 2 | 0 | 2 |
| CNAG_05571 | chr14 | 665806 | 674266 | 8460 | null | U3 small nucleolar RNA-associated protein 20 | 1 | 0 | 0 | 1 |
| CNAG_05580 | chr14 | 687177 | 688167 | 990  | null | hypothetical protein CNAG_05580              | 0 | 1 | 0 | 1 |
| CNAG_05581 | chr14 | 688759 | 693231 | 4472 | CHS3 | chitin synthase                              | 1 | 3 | 0 | 4 |
| CNAG_05583 | chr14 | 695945 | 697547 | 1602 | GCS1 | ceramide glucosyltransferase                 | 0 | 0 | 0 | 0 |
| CNAG_05585 | chr14 | 699600 | 700641 | 1041 | null | arf/Sar family protein                       | 0 | 0 | 1 | 1 |
| CNAG_05587 | chr14 | 705694 | 707141 | 1447 | null | hypothetical protein CNAG_05587              | 1 | 0 | 0 | 1 |
| CNAG_05588 | chr14 | 707701 | 712813 | 5112 | null | hypothetical protein CNAG_05588              | 0 | 1 | 0 | 1 |
| CNAG_07886 | chr14 | 712981 | 714870 | 1889 | null | hypothetical protein CNAG_07886              | 0 | 1 | 0 | 1 |
| CNAG_05590 | chr14 | 716557 | 722222 | 5665 | TCO2 | hypothetical protein CNAG_05590              | 0 | 4 | 0 | 4 |
| CNAG_05591 | chr14 | 723384 | 724981 | 1597 | null | hypothetical protein CNAG_05591              | 1 | 1 | 0 | 2 |

|            |       |        |        |      |       |                                                              |   |   |   |   |
|------------|-------|--------|--------|------|-------|--------------------------------------------------------------|---|---|---|---|
| CNAG_05592 | chr14 | 726474 | 729759 | 3285 | ECA1  | potassium/sodium efflux P-type ATPase, fungal-type           | 1 | 1 | 0 | 2 |
| CNAG_05601 | chr14 | 745534 | 748512 | 2978 | null  | calpain-like protease palB/RIM13                             | 1 | 0 | 1 | 2 |
| CNAG_05604 | chr14 | 753134 | 753855 | 721  | null  | hypothetical protein CNAG_05604                              | 0 | 1 | 0 | 1 |
| CNAG_05610 | chr14 | 769995 | 770768 | 773  | null  | hypothetical protein CNAG_05610                              | 0 | 1 | 0 | 1 |
| CNAG_05611 | chr14 | 770962 | 773010 | 2048 | null  | cysteine synthase A                                          | 0 | 1 | 0 | 1 |
| CNAG_07889 | chr14 | 773343 | 773855 | 512  | null  | hypothetical protein CNAG_07889                              | 0 | 1 | 0 | 1 |
| CNAG_05613 | chr14 | 776131 | 782461 | 6330 | null  | hypothetical protein CNAG_05613                              | 1 | 0 | 0 | 1 |
| CNAG_05614 | chr14 | 782633 | 783791 | 1158 | null  | Ybgl/family dinuclear metal center protein                   | 0 | 4 | 0 | 4 |
| CNAG_05616 | chr14 | 786283 | 790175 | 3892 | null  | ABC transporter                                              | 2 | 0 | 0 | 2 |
| CNAG_05617 | chr14 | 790517 | 793630 | 3113 | null  | phosphatidylinositol glycan, class O                         | 0 | 1 | 0 | 1 |
| CNAG_05619 | chr14 | 796985 | 798344 | 1359 | null  | TPR repeat-containing protein                                | 0 | 1 | 0 | 1 |
| CNAG_05622 | chr14 | 804417 | 808920 | 4503 | RPH1  | specific transcriptional repressor                           | 0 | 2 | 0 | 2 |
| CNAG_05623 | chr14 | 809438 | 810920 | 1482 | null  | chorismate synthase                                          | 0 | 1 | 0 | 1 |
| CNAG_05626 | chr14 | 814886 | 815974 | 1088 | null  | hypothetical protein CNAG_05626                              | 0 | 1 | 0 | 1 |
| CNAG_05627 | chr14 | 816234 | 818728 | 2494 | null  | ATP-dependent rRNA helicase SPB4                             | 0 | 0 | 0 | 0 |
| CNAG_05628 | chr14 | 818938 | 821957 | 3019 | null  | hypothetical protein CNAG_05628                              | 0 | 1 | 0 | 1 |
| CNAG_05630 | chr14 | 825400 | 826966 | 1566 | null  | hypothetical protein CNAG_05630                              | 0 | 1 | 0 | 1 |
| CNAG_05631 | chr14 | 827845 | 829649 | 1804 | null  | NADH-ubiquinone oxidoreductase 49 kDa subunit, mitochondrial | 0 | 2 | 0 | 2 |
| CNAG_05635 | chr14 | 836988 | 837623 | 635  | null  | large subunit ribosomal protein L19                          | 0 | 1 | 0 | 1 |
| CNAG_05655 | chr14 | 889044 | 889766 | 722  | null  | EF-hand calcium-binding protein                              | 0 | 1 | 0 | 1 |
| CNAG_05657 | chr14 | 894288 | 895517 | 1229 | null  | cytoplasmic protein                                          | 0 | 2 | 0 | 2 |
| CNAG_05664 | chr14 | 916619 | 918258 | 1639 | null  | branched-chain-amino-acid transaminase                       | 0 | 1 | 0 | 1 |
| CNAG_07459 | chr2  | 1207   | 1574   | 367  | null  | hypothetical protein CNAG_07459                              | 0 | 2 | 0 | 2 |
| CNAG_06799 | chr2  | 6714   | 7972   | 1258 | HEM12 | uroporphyrinogen decarboxylase                               | 0 | 1 | 0 | 1 |
| CNAG_06798 | chr2  | 8136   | 10378  | 2242 | null  | U3 small nucleolar RNA-associated protein 18                 | 2 | 0 | 0 | 2 |
| CNAG_06797 | chr2  | 10747  | 17219  | 6472 | null  | lysine-specific demethylase 3                                | 0 | 4 | 0 | 4 |
| CNAG_06795 | chr2  | 19646  | 20697  | 1051 | null  | hypothetical protein CNAG_06795                              | 0 | 0 | 2 | 2 |
| CNAG_06794 | chr2  | 21823  | 22811  | 988  | null  | hypothetical protein CNAG_06794                              | 0 | 2 | 0 | 2 |
| CNAG_06793 | chr2  | 23204  | 27195  | 3991 | null  | exonuclease 1                                                | 1 | 3 | 0 | 4 |
| CNAG_06792 | chr2  | 27412  | 28419  | 1007 | null  | hypothetical protein CNAG_06792                              | 0 | 6 | 1 | 7 |
| CNAG_06791 | chr2  | 29610  | 31026  | 1416 | null  | hypothetical protein CNAG_06791                              | 1 | 5 | 1 | 7 |
| CNAG_06790 | chr2  | 31607  | 36801  | 5194 | null  | hypothetical protein CNAG_06790                              | 1 | 0 | 1 | 2 |
| CNAG_06787 | chr2  | 40204  | 42505  | 2301 | null  | metacaspase                                                  | 1 | 0 | 1 | 2 |
| CNAG_06786 | chr2  | 43655  | 44781  | 1126 | null  | hypothetical protein CNAG_06786                              | 0 | 1 | 0 | 1 |
| CNAG_06785 | chr2  | 45235  | 46548  | 1313 | null  | kynurenine 3-monooxygenase                                   | 0 | 1 | 0 | 1 |
| CNAG_06782 | chr2  | 51787  | 53552  | 1765 | MNN2  | hypothetical protein CNAG_06782                              | 0 | 0 | 1 | 1 |
| CNAG_06781 | chr2  | 53667  | 54625  | 958  | null  | hypothetical protein CNAG_06781                              | 0 | 3 | 0 | 3 |
| CNAG_06778 | chr2  | 62105  | 63482  | 1377 | null  | serine-threonine kinase receptor-associated protein          | 0 | 0 | 1 | 1 |
| CNAG_06773 | chr2  | 74190  | 77097  | 2907 | SEC24 | protein transporter SEC24                                    | 0 | 2 | 0 | 2 |
| CNAG_06772 | chr2  | 77282  | 78750  | 1468 | null  | nucleoporin SEH1                                             | 0 | 1 | 0 | 1 |
| CNAG_06767 | chr2  | 89661  | 90954  | 1293 | null  | F-type H <sup>-</sup> -transporting ATPase subunit delta     | 0 | 1 | 0 | 1 |
| CNAG_06765 | chr2  | 98930  | 103013 | 4083 | LMP1  | hypothetical protein CNAG_06765                              | 0 | 0 | 1 | 1 |
| CNAG_06763 | chr2  | 106087 | 107785 | 1698 | null  | serine-tRNA ligase                                           | 1 | 1 | 0 | 2 |
| CNAG_06752 | chr2  | 140526 | 142531 | 2005 | null  | hypothetical protein CNAG_06752                              | 0 | 1 | 0 | 1 |
| CNAG_06747 | chr2  | 157101 | 157661 | 560  | null  | histone H2A                                                  | 0 | 1 | 0 | 1 |
| CNAG_06737 | chr2  | 180985 | 183759 | 2774 | null  | vacuolar protein sorting-associated protein                  | 0 | 1 | 0 | 1 |
| CNAG_07463 | chr2  | 185063 | 192509 | 7446 | null  | separase                                                     | 0 | 4 | 1 | 5 |

|            |      |        |        |      |      |                                                                               |   |   |   |   |
|------------|------|--------|--------|------|------|-------------------------------------------------------------------------------|---|---|---|---|
| CNAG_06734 | chr2 | 192761 | 193261 | 500  | null | DNA-directed RNA polymerase I, II, and III subunit rpabc5                     | 0 | 1 | 0 | 1 |
| CNAG_06731 | chr2 | 202071 | 204779 | 2708 | null | hypothetical protein CNAG_06731                                               | 1 | 0 | 1 | 2 |
| CNAG_06730 | chr2 | 206338 | 207745 | 1407 | GSK3 | CMGC/GSK protein kinase                                                       | 0 | 1 | 0 | 1 |
| CNAG_06728 | chr2 | 209220 | 212783 | 3563 | null | kinesin                                                                       | 2 | 0 | 0 | 2 |
| CNAG_06727 | chr2 | 213693 | 216968 | 3275 | null | hypothetical protein CNAG_06727                                               | 0 | 1 | 0 | 1 |
| CNAG_07963 | chr2 | 218399 | 218865 | 466  | null | hypothetical protein CNAG_07963                                               | 0 | 1 | 0 | 1 |
| CNAG_06725 | chr2 | 222631 | 224542 | 1911 | null | DNA polymerase delta subunit 2                                                | 0 | 5 | 0 | 5 |
| CNAG_06723 | chr2 | 227368 | 228386 | 1018 | null | succinate dehydrogenase (ubiquinone) membrane anchor subunit                  | 0 | 1 | 0 | 1 |
| CNAG_06722 | chr2 | 229364 | 230978 | 1614 | null | hypothetical protein CNAG_06722                                               | 1 | 0 | 2 | 3 |
| CNAG_07464 | chr2 | 231155 | 233770 | 2615 | MBS1 | transcription factor                                                          | 1 | 4 | 2 | 7 |
| CNAG_07465 | chr2 | 234195 | 235073 | 878  | null | hypothetical protein CNAG_07465                                               | 0 | 1 | 0 | 1 |
| CNAG_06719 | chr2 | 235880 | 239543 | 3663 | null | hypothetical protein CNAG_06719                                               | 4 | 0 | 0 | 4 |
| CNAG_06717 | chr2 | 241165 | 242396 | 1231 | null | acyl-CoA-dependent ceramide synthase                                          | 0 | 1 | 0 | 1 |
| CNAG_06716 | chr2 | 242827 | 243841 | 1014 | null | hypothetical protein CNAG_06716                                               | 0 | 1 | 0 | 1 |
| CNAG_06715 | chr2 | 243971 | 244790 | 819  | null | hypothetical protein CNAG_06715                                               | 1 | 0 | 0 | 1 |
| CNAG_06712 | chr2 | 249447 | 250053 | 606  | null | hypothetical protein CNAG_06712                                               | 0 | 2 | 0 | 2 |
| CNAG_06710 | chr2 | 251902 | 252661 | 759  | null | hypothetical protein CNAG_06710                                               | 0 | 1 | 0 | 1 |
| CNAG_06706 | chr2 | 262148 | 263310 | 1162 | null | proline-, glutamic acid- and leucine-rich protein 1                           | 0 | 1 | 0 | 1 |
| CNAG_03597 | chr2 | 290217 | 294055 | 3838 | null | hypothetical protein CNAG_03597                                               | 0 | 0 | 0 | 0 |
| CNAG_03599 | chr2 | 296389 | 298911 | 2522 | null | mandelate racemase/muconate lactonizing enzyme                                | 1 | 0 | 0 | 1 |
| CNAG_03600 | chr2 | 299137 | 304126 | 4989 | STE6 | ATP-binding cassette, subfamily B (MDR/TAP), member 1                         | 1 | 0 | 2 | 3 |
| CNAG_07964 | chr2 | 304415 | 309697 | 5282 | null | hypothetical protein CNAG_07964                                               | 1 | 0 | 1 | 2 |
| CNAG_03603 | chr2 | 313707 | 315542 | 1835 | null | ATP-dependent RNA helicase HAS1                                               | 0 | 1 | 0 | 1 |
| CNAG_03606 | chr2 | 319325 | 323593 | 4268 | null | translation initiation factor aIF-2                                           | 1 | 0 | 0 | 1 |
| CNAG_07469 | chr2 | 332247 | 338382 | 6135 | null | nuclear pore complex protein Nup98-Nup96                                      | 0 | 0 | 1 | 1 |
| CNAG_03613 | chr2 | 340710 | 342148 | 1438 | null | hypothetical protein CNAG_03613                                               | 1 | 1 | 0 | 2 |
| CNAG_07470 | chr2 | 344145 | 348334 | 4189 | PDE2 | high-affinity phosphodiesterase                                               | 0 | 3 | 0 | 3 |
| CNAG_03617 | chr2 | 351126 | 352605 | 1479 | CLP1 | clampless protein 1                                                           | 1 | 0 | 0 | 1 |
| CNAG_03619 | chr2 | 354385 | 356115 | 1730 | null | solute carrier family 29 (equilibrative nucleoside transporter), member 1/2/3 | 0 | 0 | 1 | 1 |
| CNAG_03620 | chr2 | 356282 | 360711 | 4429 | null | hypothetical protein CNAG_03620                                               | 1 | 0 | 0 | 1 |
| CNAG_03622 | chr2 | 362716 | 370139 | 7423 | TAO3 | cell polarity protein mor2                                                    | 1 | 0 | 2 | 3 |
| CNAG_03624 | chr2 | 372749 | 374797 | 2048 | null | pescadillo                                                                    | 0 | 1 | 0 | 1 |
| CNAG_03625 | chr2 | 375002 | 378300 | 3298 | null | RNA polymerase I-specific transcription initiation factor RRN7                | 1 | 1 | 0 | 2 |
| CNAG_03626 | chr2 | 378584 | 383072 | 4488 | null | actin cross-linking protein                                                   | 0 | 0 | 2 | 2 |
| CNAG_03627 | chr2 | 383378 | 384100 | 722  | CPA1 | peptidyl-prolyl cis-trans isomerase                                           | 0 | 1 | 0 | 1 |
| CNAG_03633 | chr2 | 393383 | 396366 | 2983 | null | hypothetical protein CNAG_03633                                               | 0 | 0 | 1 | 1 |
| CNAG_03639 | chr2 | 409491 | 410510 | 1019 | null | hypothetical protein CNAG_03639                                               | 0 | 1 | 0 | 1 |
| CNAG_03647 | chr2 | 431568 | 432595 | 1027 | null | hypothetical protein CNAG_03647                                               | 0 | 1 | 0 | 1 |
| CNAG_03652 | chr2 | 443400 | 444200 | 800  | null | dynactin 6                                                                    | 0 | 1 | 0 | 1 |
| CNAG_03653 | chr2 | 444276 | 447039 | 2763 | null | hypothetical protein CNAG_03653                                               | 1 | 0 | 0 | 1 |
| CNAG_03657 | chr2 | 459928 | 464677 | 4749 | null | hypothetical protein CNAG_03657                                               | 1 | 0 | 0 | 1 |
| CNAG_03671 | chr2 | 496022 | 497313 | 1291 | null | hypothetical protein CNAG_03671                                               | 1 | 0 | 1 | 2 |
| CNAG_03672 | chr2 | 497504 | 498464 | 960  | null | BET3 family protein                                                           | 0 | 1 | 0 | 1 |
| CNAG_03675 | chr2 | 506073 | 508341 | 2268 | null | pumilio domain-containing protein                                             | 1 | 0 | 0 | 1 |
| CNAG_03676 | chr2 | 508503 | 510312 | 1809 | null | D-lactate dehydrogenase                                                       | 0 | 2 | 0 | 2 |
| CNAG_03677 | chr2 | 512980 | 514234 | 1254 | null | hypothetical protein CNAG_03677                                               | 0 | 3 | 0 | 3 |
| CNAG_03678 | chr2 | 514537 | 516287 | 1750 | null | hypothetical protein CNAG_03678                                               | 0 | 2 | 1 | 3 |

|            |      |        |        |      |       |                                                     |   |   |   |   |
|------------|------|--------|--------|------|-------|-----------------------------------------------------|---|---|---|---|
| CNAG_03680 | chr2 | 518108 | 522009 | 3901 | ROM21 | hypothetical protein CNAG_03680                     | 1 | 1 | 0 | 2 |
| CNAG_03682 | chr2 | 525258 | 526002 | 744  | FRR1  | FK506-binding protein 1                             | 0 | 3 | 0 | 3 |
| CNAG_03686 | chr2 | 532833 | 533702 | 869  | null  | UDP-N-acetylglucosamine transferase subunit ALG14   | 0 | 1 | 0 | 1 |
| CNAG_03687 | chr2 | 533770 | 535221 | 1451 | null  | hypothetical protein CNAG_03687                     | 1 | 0 | 1 | 2 |
| CNAG_03689 | chr2 | 538113 | 540467 | 2354 | null  | zf-C3HC4 type zinc finger protein                   | 1 | 2 | 0 | 3 |
| CNAG_07473 | chr2 | 541201 | 545224 | 4023 | null  | valine-tRNA ligase                                  | 2 | 0 | 3 | 5 |
| CNAG_03694 | chr2 | 550195 | 551962 | 1767 | CFT3  | iron ion transporter                                | 0 | 0 | 1 | 1 |
| CNAG_03695 | chr2 | 552218 | 554018 | 1800 | CAS41 | hypothetical protein CNAG_03695                     | 0 | 0 | 1 | 1 |
| CNAG_03699 | chr2 | 563166 | 566689 | 3523 | null  | pre-mRNA-processing ATP-dependent RNA helicase PRP5 | 1 | 0 | 0 | 1 |
| CNAG_03700 | chr2 | 567432 | 568991 | 1559 | null  | hypothetical protein CNAG_03700                     | 0 | 1 | 0 | 1 |
| CNAG_03701 | chr2 | 569253 | 574360 | 5107 | null  | 3-phosphoshikimate 1-carboxyvinyltransferase        | 0 | 1 | 0 | 1 |
| CNAG_03705 | chr2 | 577804 | 578785 | 981  | null  | hypothetical protein CNAG_03705                     | 0 | 1 | 0 | 1 |
| CNAG_03707 | chr2 | 582885 | 585017 | 2132 | null  | efflux protein                                      | 0 | 0 | 1 | 1 |
| CNAG_07475 | chr2 | 603345 | 603971 | 626  | null  | hypothetical protein CNAG_07475                     | 0 | 1 | 0 | 1 |
| CNAG_03714 | chr2 | 604912 | 607619 | 2707 | null  | microtubule motor protein                           | 0 | 1 | 0 | 1 |
| CNAG_03719 | chr2 | 617366 | 619662 | 2296 | null  | hypothetical protein CNAG_03719                     | 1 | 0 | 0 | 1 |
| CNAG_03722 | chr2 | 622962 | 624823 | 1861 | null  | RAN protein binding protein                         | 0 | 2 | 0 | 2 |
| CNAG_03723 | chr2 | 625352 | 628025 | 2673 | null  | nuclear protein                                     | 0 | 0 | 1 | 1 |
| CNAG_03726 | chr2 | 632368 | 635693 | 3325 | null  | hypothetical protein CNAG_03726                     | 1 | 0 | 0 | 1 |
| CNAG_03727 | chr2 | 638234 | 642299 | 4065 | null  | hypothetical protein CNAG_03727                     | 0 | 1 | 0 | 1 |
| CNAG_03733 | chr2 | 653371 | 656599 | 3228 | null  | hypothetical protein CNAG_03733                     | 0 | 1 | 0 | 1 |
| CNAG_03734 | chr2 | 656879 | 659085 | 2206 | null  | hypothetical protein CNAG_03734                     | 2 | 0 | 1 | 3 |
| CNAG_03735 | chr2 | 659468 | 662324 | 2856 | CAP4  | hypothetical protein CNAG_03735                     | 1 | 3 | 0 | 4 |
| CNAG_03740 | chr2 | 670144 | 671151 | 1007 | null  | hypothetical protein CNAG_03740                     | 1 | 3 | 0 | 4 |
| CNAG_03743 | chr2 | 678228 | 679908 | 1680 | null  | glutamine amidotransferase                          | 1 | 0 | 0 | 1 |
| CNAG_03745 | chr2 | 681856 | 684633 | 2777 | null  | hypothetical protein CNAG_03745                     | 0 | 0 | 1 | 1 |
| CNAG_03747 | chr2 | 686626 | 687348 | 722  | null  | large subunit ribosomal protein L27Ae               | 0 | 1 | 0 | 1 |
| CNAG_03748 | chr2 | 687877 | 696697 | 8820 | null  | large subunit ribosomal protein L19                 | 1 | 0 | 0 | 1 |
| CNAG_03756 | chr2 | 712811 | 717414 | 4603 | null  | hypothetical protein CNAG_03756                     | 0 | 1 | 1 | 2 |
| CNAG_07479 | chr2 | 718243 | 723403 | 5160 | null  | hypothetical protein CNAG_07479                     | 1 | 0 | 1 | 2 |
| CNAG_07480 | chr2 | 723951 | 724484 | 533  | null  | cytochrome b5 reductase                             | 1 | 0 | 0 | 1 |
| CNAG_07203 | chr2 | 724739 | 725133 | 394  | null  | hypothetical protein CNAG_07203                     | 0 | 1 | 0 | 1 |
| CNAG_03761 | chr2 | 730717 | 734395 | 3678 | null  | mRNA 3'-end-processing protein RNA14                | 0 | 1 | 1 | 2 |
| CNAG_03763 | chr2 | 738056 | 745073 | 7017 | null  | IQ domain-containing GTPase activating protein      | 1 | 0 | 1 | 2 |
| CNAG_03764 | chr2 | 745876 | 746925 | 1049 | null  | integral membrane protein                           | 0 | 1 | 0 | 1 |
| CNAG_03766 | chr2 | 751385 | 752187 | 802  | null  | ankyrin repeat-containing protein                   | 1 | 0 | 0 | 1 |
| CNAG_03767 | chr2 | 755293 | 760187 | 4894 | null  | cohesin complex subunit psm1                        | 0 | 1 | 0 | 1 |
| CNAG_03768 | chr2 | 761022 | 764830 | 3808 | null  | hypothetical protein CNAG_03768                     | 1 | 0 | 0 | 1 |
| CNAG_03769 | chr2 | 765734 | 767835 | 2101 | HXK2  | hexokinase                                          | 0 | 2 | 0 | 2 |
| CNAG_03771 | chr2 | 769393 | 771324 | 1931 | null  | DNA binding protein Ncp1                            | 0 | 1 | 0 | 1 |
| CNAG_03779 | chr2 | 795887 | 797310 | 1423 | null  | large subunit ribosomal protein L4                  | 0 | 1 | 0 | 1 |
| CNAG_03780 | chr2 | 797795 | 798508 | 713  | null  | small subunit ribosomal protein S16                 | 0 | 1 | 0 | 1 |
| CNAG_03781 | chr2 | 799118 | 802091 | 2973 | null  | hypothetical protein CNAG_03781                     | 1 | 0 | 0 | 1 |
| CNAG_03784 | chr2 | 806773 | 808974 | 2201 | null  | hypothetical protein CNAG_03784                     | 1 | 0 | 0 | 1 |
| CNAG_03785 | chr2 | 809748 | 813025 | 3277 | NTH1  | alpha,alpha-trehalase                               | 0 | 2 | 0 | 2 |
| CNAG_03787 | chr2 | 816598 | 818387 | 1789 | null  | tubulin alpha-1A chain                              | 0 | 1 | 0 | 1 |
| CNAG_03790 | chr2 | 821960 | 823413 | 1453 | null  | hypothetical protein CNAG_03790                     | 0 | 4 | 0 | 4 |

|            |      |         |         |      |        |                                                                                  |   |   |   |   |
|------------|------|---------|---------|------|--------|----------------------------------------------------------------------------------|---|---|---|---|
| CNAG_03791 | chr2 | 823857  | 827411  | 3554 | null   | CAMKK/ELM protein kinase                                                         | 0 | 2 | 0 | 2 |
| CNAG_03794 | chr2 | 830386  | 832005  | 1619 | null   | endoplasmic reticulum protein                                                    | 1 | 1 | 0 | 2 |
| CNAG_03795 | chr2 | 832152  | 833484  | 1332 | null   | N-glycosylase/DNA lyase                                                          | 2 | 2 | 1 | 5 |
| CNAG_03796 | chr2 | 833610  | 835098  | 1488 | null   | NAK protein kinase                                                               | 0 | 2 | 1 | 3 |
| CNAG_03797 | chr2 | 836678  | 837565  | 887  | null   | hypothetical protein CNAG_03797                                                  | 1 | 0 | 0 | 1 |
| CNAG_03806 | chr2 | 895239  | 896745  | 1506 | null   | acyltransferase                                                                  | 1 | 0 | 0 | 1 |
| CNAG_03809 | chr2 | 902648  | 904845  | 2197 | null   | hypothetical protein CNAG_03809                                                  | 1 | 1 | 1 | 3 |
| CNAG_03810 | chr2 | 905044  | 905703  | 659  | null   | large subunit ribosomal protein L13                                              | 0 | 1 | 0 | 1 |
| CNAG_03811 | chr2 | 906032  | 908066  | 2034 | null   | AGC/YANK protein kinase                                                          | 0 | 0 | 1 | 1 |
| CNAG_03812 | chr2 | 909282  | 910649  | 1367 | null   | histidinol-phosphate transaminase                                                | 0 | 1 | 0 | 1 |
| CNAG_03817 | chr2 | 916894  | 918012  | 1118 | null   | cell growth-regulating nucleolar protein                                         | 1 | 0 | 1 | 2 |
| CNAG_03818 | chr2 | 918188  | 922308  | 4120 | SSK1   | osmolarity two-component system, response regulator SSK1                         | 1 | 0 | 0 | 1 |
| CNAG_03821 | chr2 | 927804  | 931107  | 3303 | null   | phosphatidylinositol 3-kinase                                                    | 1 | 0 | 0 | 1 |
| CNAG_03824 | chr2 | 935139  | 936568  | 1429 | null   | solute carrier family 25 (mitochondrial phosphate transporter), member 3         | 0 | 1 | 0 | 1 |
| CNAG_03827 | chr2 | 944584  | 947747  | 3163 | null   | hypothetical protein CNAG_03827                                                  | 0 | 1 | 0 | 1 |
| CNAG_03834 | chr2 | 961619  | 962767  | 1148 | null   | C4-hydroxylase                                                                   | 0 | 1 | 0 | 1 |
| CNAG_03836 | chr2 | 965821  | 969037  | 3216 | null   | hypothetical protein CNAG_03836                                                  | 1 | 1 | 0 | 2 |
| CNAG_03839 | chr2 | 974291  | 977393  | 3102 | null   | CCR4-NOT transcription complex subunit 4                                         | 0 | 0 | 1 | 1 |
| CNAG_03841 | chr2 | 981171  | 984024  | 2853 | null   | hypothetical protein CNAG_03841                                                  | 1 | 0 | 0 | 1 |
| CNAG_03842 | chr2 | 985088  | 987205  | 2117 | null   | hypothetical protein CNAG_03842                                                  | 0 | 0 | 1 | 1 |
| CNAG_03845 | chr2 | 995079  | 997036  | 1957 | FNX1   | multidrug resistance protein fnx1                                                | 2 | 0 | 0 | 2 |
| CNAG_03848 | chr2 | 1001888 | 1003267 | 1379 | null   | glutathione transferase                                                          | 0 | 0 | 1 | 1 |
| CNAG_03849 | chr2 | 1004300 | 1007396 | 3096 | null   | nuclear protein                                                                  | 0 | 1 | 0 | 1 |
| CNAG_03851 | chr2 | 1011831 | 1013622 | 1791 | null   | general transcription factor 3C polypeptide 5 (transcription factor C subunit 1) | 1 | 1 | 0 | 2 |
| CNAG_03855 | chr2 | 1018971 | 1020357 | 1386 | null   | phosphatidylinositol glycan, class M                                             | 1 | 0 | 0 | 1 |
| CNAG_03858 | chr2 | 1025017 | 1026188 | 1171 | null   | hypothetical protein CNAG_03858                                                  | 0 | 1 | 0 | 1 |
| CNAG_03870 | chr2 | 1050281 | 1052310 | 2029 | null   | delta8-fatty-acid desaturase                                                     | 1 | 0 | 0 | 1 |
| CNAG_03872 | chr2 | 1053858 | 1057038 | 3180 | UBP7   | hypothetical protein CNAG_03872                                                  | 0 | 0 | 1 | 1 |
| CNAG_03874 | chr2 | 1060823 | 1062593 | 1770 | null   | oxidoreductase                                                                   | 0 | 1 | 0 | 1 |
| CNAG_03875 | chr2 | 1063020 | 1064739 | 1719 | null   | galactose-1-phosphate uridylyltransferase                                        | 0 | 2 | 0 | 2 |
| CNAG_07483 | chr2 | 1075267 | 1082121 | 6854 | null   | DNA polymerase zeta subunit                                                      | 2 | 0 | 0 | 2 |
| CNAG_03881 | chr2 | 1082420 | 1085122 | 2702 | null   | hypothetical protein CNAG_03881                                                  | 1 | 1 | 0 | 2 |
| CNAG_03886 | chr2 | 1096775 | 1099234 | 2459 | null   | hypothetical protein CNAG_03886                                                  | 1 | 0 | 0 | 1 |
| CNAG_03888 | chr2 | 1100510 | 1104612 | 4102 | null   | hypothetical protein CNAG_03888                                                  | 2 | 1 | 0 | 3 |
| CNAG_03889 | chr2 | 1105521 | 1107480 | 1959 | null   | hypothetical protein CNAG_03889                                                  | 1 | 0 | 0 | 1 |
| CNAG_03891 | chr2 | 1109513 | 1111488 | 1975 | null   | hsp60-like protein                                                               | 0 | 0 | 1 | 1 |
| CNAG_03892 | chr2 | 1111703 | 1112241 | 538  | null   | chaperonin GroES                                                                 | 0 | 1 | 0 | 1 |
| CNAG_03893 | chr2 | 1112833 | 1115678 | 2845 | null   | MAP kinase phosphatase                                                           | 1 | 0 | 0 | 1 |
| CNAG_03894 | chr2 | 1118740 | 1121260 | 2520 | PDR802 | hypothetical protein CNAG_03894                                                  | 0 | 0 | 1 | 1 |
| CNAG_03896 | chr2 | 1124274 | 1124771 | 497  | null   | hypothetical protein CNAG_03896                                                  | 0 | 1 | 1 | 2 |
| CNAG_03900 | chr2 | 1133139 | 1134280 | 1141 | null   | capping protein (actin filament) muscle Z-line, beta                             | 0 | 1 | 0 | 1 |
| CNAG_03902 | chr2 | 1136697 | 1139074 | 2377 | null   | transcriptional regulatory protein                                               | 1 | 0 | 0 | 1 |
| CNAG_03903 | chr2 | 1139343 | 1144047 | 4704 | null   | hypothetical protein CNAG_03903                                                  | 1 | 0 | 0 | 1 |
| CNAG_03913 | chr2 | 1170550 | 1171779 | 1229 | null   | hypothetical protein CNAG_03913                                                  | 0 | 1 | 0 | 1 |
| CNAG_03915 | chr2 | 1176924 | 1178939 | 2015 | null   | hypothetical protein CNAG_03915                                                  | 1 | 0 | 0 | 1 |
| CNAG_03916 | chr2 | 1179182 | 1181157 | 1975 | null   | glucose-6-phosphate isomerase                                                    | 0 | 0 | 3 | 3 |
| CNAG_03918 | chr2 | 1184421 | 1188494 | 4073 | SOG2   | hypothetical protein CNAG_03918                                                  | 1 | 1 | 0 | 2 |



|            |      |         |         |      |      |                                                                         |   |   |   |   |
|------------|------|---------|---------|------|------|-------------------------------------------------------------------------|---|---|---|---|
| CNAG_03920 | chr2 | 1189966 | 1191832 | 1866 | IDP1 | isocitrate dehydrogenase, NADP-dependent                                | 0 | 0 | 1 | 1 |
| CNAG_03922 | chr2 | 1195192 | 1196243 | 1051 | null | hypothetical protein CNAG_03922                                         | 1 | 0 | 0 | 1 |
| CNAG_03924 | chr2 | 1200363 | 1201530 | 1167 | null | nit protein 1                                                           | 0 | 1 | 0 | 1 |
| CNAG_03925 | chr2 | 1201630 | 1202446 | 816  | null | mitochondrial inner membrane protease subunit 2                         | 0 | 2 | 0 | 2 |
| CNAG_03927 | chr2 | 1204515 | 1205024 | 509  | null | hypothetical protein CNAG_03927                                         | 1 | 0 | 0 | 1 |
| CNAG_03934 | chr2 | 1216983 | 1219987 | 3004 | null | hypothetical protein CNAG_03934                                         | 0 | 0 | 1 | 1 |
| CNAG_03936 | chr2 | 1224001 | 1225045 | 1044 | null | NAD(P)H:quinone oxidoreductase, type IV                                 | 0 | 1 | 0 | 1 |
| CNAG_03940 | chr2 | 1233055 | 1235712 | 2657 | null | elongator complex protein 2                                             | 1 | 0 | 0 | 1 |
| CNAG_03944 | chr2 | 1247201 | 1248817 | 1616 | null | chaperone regulator                                                     | 0 | 1 | 0 | 1 |
| CNAG_03945 | chr2 | 1249162 | 1250872 | 1710 | null | hypothetical protein CNAG_03945                                         | 1 | 0 | 1 | 2 |
| CNAG_03946 | chr2 | 1250994 | 1252977 | 1983 | null | galactokinase                                                           | 0 | 2 | 0 | 2 |
| CNAG_07486 | chr2 | 1253370 | 1254845 | 1475 | null | hypothetical protein CNAG_07486                                         | 1 | 0 | 0 | 1 |
| CNAG_03950 | chr2 | 1259254 | 1264033 | 4779 | null | transcription elongation factor SPT6                                    | 1 | 0 | 2 | 3 |
| CNAG_03955 | chr2 | 1270670 | 1272900 | 2230 | null | L-methionine transporter                                                | 0 | 1 | 0 | 1 |
| CNAG_03958 | chr2 | 1276338 | 1277454 | 1116 | null | hypothetical protein CNAG_03958                                         | 0 | 1 | 0 | 1 |
| CNAG_03960 | chr2 | 1279126 | 1281494 | 2368 | null | Gly-Xaa carboxypeptidase                                                | 2 | 0 | 0 | 2 |
| CNAG_03963 | chr2 | 1287314 | 1288092 | 778  | null | tyrosine phosphatase                                                    | 0 | 0 | 1 | 1 |
| CNAG_03966 | chr2 | 1291567 | 1295373 | 3806 | null | hypothetical protein CNAG_03966                                         | 1 | 0 | 0 | 1 |
| CNAG_07488 | chr2 | 1300913 | 1302248 | 1335 | null | hypothetical protein CNAG_07488                                         | 0 | 1 | 0 | 1 |
| CNAG_03980 | chr2 | 1324369 | 1325526 | 1157 | null | hypothetical protein CNAG_03980                                         | 0 | 1 | 0 | 1 |
| CNAG_03987 | chr2 | 1336238 | 1339607 | 3369 | null | elongation factor 1 alpha-like protein                                  | 0 | 1 | 0 | 1 |
| CNAG_03991 | chr2 | 1347083 | 1348997 | 1914 | null | integral membrane protein                                               | 0 | 1 | 0 | 1 |
| CNAG_03994 | chr2 | 1353697 | 1355038 | 1341 | null | leucine carboxyl methyltransferase 1                                    | 0 | 2 | 1 | 3 |
| CNAG_03997 | chr2 | 1359050 | 1359775 | 725  | null | hypothetical protein CNAG_03997                                         | 0 | 0 | 1 | 1 |
| CNAG_03998 | chr2 | 1360135 | 1362029 | 1894 | RLM1 | transcriptional activator                                               | 1 | 1 | 1 | 3 |
| CNAG_04005 | chr2 | 1376966 | 1379479 | 2513 | null | cytoplasmic protein                                                     | 0 | 0 | 1 | 1 |
| CNAG_04011 | chr2 | 1394939 | 1395680 | 741  | null | large subunit ribosomal protein L37a                                    | 0 | 1 | 0 | 1 |
| CNAG_04023 | chr2 | 1423254 | 1425631 | 2377 | null | hypothetical protein CNAG_04023                                         | 0 | 1 | 0 | 1 |
| CNAG_07490 | chr2 | 1426853 | 1427065 | 212  | null | hypothetical protein CNAG_07490                                         | 0 | 1 | 0 | 1 |
| CNAG_04024 | chr2 | 1427982 | 1429640 | 1658 | ITR5 | sugar transporter                                                       | 0 | 1 | 0 | 1 |
| CNAG_04026 | chr2 | 1433470 | 1436840 | 3370 | null | chromosome transmission fidelity protein 1                              | 0 | 1 | 0 | 1 |
| CNAG_04028 | chr2 | 1439809 | 1441317 | 1508 | null | RNA binding protein                                                     | 1 | 0 | 0 | 1 |
| CNAG_04029 | chr2 | 1441586 | 1443774 | 2188 | null | cytochrome P450                                                         | 1 | 0 | 0 | 1 |
| CNAG_04032 | chr2 | 1447920 | 1450587 | 2667 | null | AFG3 family protein                                                     | 0 | 3 | 0 | 3 |
| CNAG_04034 | chr2 | 1456128 | 1457453 | 1325 | null | hypothetical protein CNAG_04034                                         | 1 | 1 | 0 | 2 |
| CNAG_04035 | chr2 | 1458188 | 1459831 | 1643 | null | hypothetical protein CNAG_04035                                         | 0 | 2 | 0 | 2 |
| CNAG_04036 | chr2 | 1461932 | 1464161 | 2229 | null | hypothetical protein CNAG_04036                                         | 0 | 1 | 0 | 1 |
| CNAG_04037 | chr2 | 1464768 | 1465158 | 390  | null | hypothetical protein CNAG_04037                                         | 0 | 1 | 0 | 1 |
| CNAG_04038 | chr2 | 1465738 | 1467836 | 2098 | null | MFS quinate transporter QutD                                            | 0 | 1 | 0 | 1 |
| CNAG_04040 | chr2 | 1473636 | 1477094 | 3458 | null | AGC/RSK protein kinase                                                  | 0 | 1 | 0 | 1 |
| CNAG_04041 | chr2 | 1477635 | 1481103 | 3468 | null | hypothetical protein CNAG_04041                                         | 0 | 1 | 0 | 1 |
| CNAG_04042 | chr2 | 1481660 | 1482842 | 1182 | null | hypothetical protein CNAG_04042                                         | 0 | 0 | 1 | 1 |
| CNAG_04044 | chr2 | 1485397 | 1486948 | 1551 | null | U3 small nucleolar RNA-associated protein 6                             | 1 | 1 | 0 | 2 |
| CNAG_04047 | chr2 | 1489438 | 1492448 | 3010 | null | hypothetical protein CNAG_04047                                         | 1 | 0 | 0 | 1 |
| CNAG_04048 | chr2 | 1492664 | 1494320 | 1656 | null | 53 kda brg1-associated factor b                                         | 0 | 1 | 0 | 1 |
| CNAG_04051 | chr2 | 1498701 | 1503979 | 5278 | null | ATP-dependent RNA helicase A                                            | 1 | 0 | 0 | 1 |
| CNAG_04052 | chr2 | 1504206 | 1506898 | 2692 | null | minichromosome maintenance protein 5 (cell division control protein 46) | 1 | 0 | 0 | 1 |

|            |      |         |         |      |      |                                                             |   |   |   |   |
|------------|------|---------|---------|------|------|-------------------------------------------------------------|---|---|---|---|
| CNAG_04054 | chr2 | 1508529 | 1509321 | 792  | null | translation initiation factor SUI1                          | 0 | 0 | 1 | 1 |
| CNAG_04055 | chr2 | 1509523 | 1511096 | 1573 | null | cell cycle checkpoint protein                               | 0 | 0 | 1 | 1 |
| CNAG_04056 | chr2 | 1511765 | 1513171 | 1406 | null | hypothetical protein CNAG_04056                             | 0 | 0 | 2 | 2 |
| CNAG_07491 | chr2 | 1513644 | 1515025 | 1381 | null | glutaredoxin                                                | 0 | 6 | 0 | 6 |
| CNAG_04059 | chr2 | 1522304 | 1523732 | 1428 | null | hypothetical protein CNAG_04059                             | 0 | 1 | 0 | 1 |
| CNAG_04060 | chr2 | 1524759 | 1525830 | 1071 | null | hypothetical protein CNAG_04060                             | 0 | 1 | 0 | 1 |
| CNAG_04065 | chr2 | 1535509 | 1536230 | 721  | null | UDP-N-acetylglucosamine transferase subunit ALG13           | 0 | 1 | 0 | 1 |
| CNAG_04068 | chr2 | 1539324 | 1540537 | 1213 | null | large subunit ribosomal protein L28e                        | 0 | 2 | 0 | 2 |
| CNAG_04070 | chr2 | 1545501 | 1549164 | 3663 | null | exonuclease                                                 | 0 | 1 | 1 | 2 |
| CNAG_04072 | chr2 | 1551864 | 1552785 | 921  | null | 60S ribosome subunit biogenesis protein nip7                | 0 | 0 | 1 | 1 |
| CNAG_04073 | chr2 | 1553822 | 1557873 | 4051 | null | hypothetical protein CNAG_04073                             | 1 | 2 | 0 | 3 |
| CNAG_07494 | chr2 | 1562709 | 1565306 | 2597 | null | U3 small nucleolar RNA-associated protein MPP10             | 0 | 1 | 0 | 1 |
| CNAG_04077 | chr2 | 1566587 | 1566931 | 344  | null | hypothetical protein CNAG_04077                             | 0 | 2 | 0 | 2 |
| CNAG_04083 | chr2 | 1578334 | 1581957 | 3623 | null | dolichol kinase                                             | 1 | 0 | 0 | 1 |
| CNAG_04084 | chr2 | 1582631 | 1584222 | 1591 | null | hypothetical protein CNAG_04084                             | 0 | 1 | 0 | 1 |
| CNAG_04085 | chr2 | 1584721 | 1586410 | 1689 | null | oxidoreductase                                              | 1 | 2 | 1 | 4 |
| CNAG_04086 | chr2 | 1587286 | 1589210 | 1924 | null | hypothetical protein CNAG_04086                             | 1 | 0 | 0 | 1 |
| CNAG_04087 | chr2 | 1589326 | 1590517 | 1191 | null | hypothetical protein CNAG_04087                             | 1 | 0 | 0 | 1 |
| CNAG_04092 | chr2 | 1597881 | 1600252 | 2371 | null | sugar transporter                                           | 0 | 1 | 0 | 1 |
| CNAG_04097 | chr2 | 1611266 | 1612295 | 1029 | null | glucose 1-dehydrogenase                                     | 0 | 1 | 0 | 1 |
| CNAG_07499 | chr3 | 23655   | 28012   | 4357 | CHS8 | chitin synthase                                             | 1 | 0 | 0 | 1 |
| CNAG_06963 | chr3 | 29042   | 31344   | 2302 | null | sugar transporter                                           | 0 | 0 | 1 | 1 |
| CNAG_06962 | chr3 | 33850   | 35487   | 1637 | null | DNA ligase D, 3'\-phosphoesterase domain-containing protein | 1 | 0 | 0 | 1 |
| CNAG_03081 | chr3 | 38076   | 40211   | 2135 | null | ATP-dependent RNA helicase MRH4, mitochondrial              | 1 | 0 | 1 | 2 |
| CNAG_03080 | chr3 | 41347   | 42926   | 1579 | null | fatty acid elongase                                         | 0 | 1 | 0 | 1 |
| CNAG_03072 | chr3 | 58337   | 60254   | 1917 | null | enolase                                                     | 0 | 2 | 0 | 2 |
| CNAG_03071 | chr3 | 61057   | 62943   | 1886 | null | hypothetical protein CNAG_03071                             | 0 | 1 | 0 | 1 |
| CNAG_03069 | chr3 | 65593   | 66479   | 886  | null | hydrolase                                                   | 0 | 1 | 0 | 1 |
| CNAG_07502 | chr3 | 70244   | 72682   | 2438 | null | CTP synthase                                                | 1 | 0 | 0 | 1 |
| CNAG_03063 | chr3 | 75785   | 81790   | 6005 | null | hypothetical protein CNAG_03063                             | 1 | 0 | 1 | 2 |
| CNAG_03061 | chr3 | 87231   | 89316   | 2085 | null | multiple drug resistance protein                            | 0 | 2 | 0 | 2 |
| CNAG_03059 | chr3 | 94461   | 98231   | 3770 | null | hypothetical protein CNAG_03059                             | 0 | 1 | 0 | 1 |
| CNAG_03056 | chr3 | 103262  | 103756  | 494  | null | hypothetical protein CNAG_03056                             | 0 | 1 | 0 | 1 |
| CNAG_03052 | chr3 | 110998  | 113374  | 2376 | null | PP2Cc protein phosphatase                                   | 0 | 0 | 1 | 1 |
| CNAG_03051 | chr3 | 114225  | 116505  | 2280 | null | polyamine transporter                                       | 1 | 2 | 0 | 3 |
| CNAG_03040 | chr3 | 136251  | 138980  | 2729 | null | transketolase                                               | 1 | 1 | 1 | 3 |
| CNAG_03039 | chr3 | 139453  | 141286  | 1833 | null | DNA damage-inducible protein 1                              | 0 | 0 | 1 | 1 |
| CNAG_03038 | chr3 | 141568  | 142728  | 1160 | null | hypothetical protein CNAG_03038                             | 0 | 5 | 0 | 5 |
| CNAG_03037 | chr3 | 143154  | 145181  | 2027 | null | hypothetical protein CNAG_03037                             | 1 | 0 | 2 | 3 |
| CNAG_03036 | chr3 | 145411  | 148931  | 3520 | null | potassium ion transporter                                   | 2 | 4 | 0 | 6 |
| CNAG_03033 | chr3 | 154789  | 156462  | 1673 | null | hypothetical protein CNAG_03033                             | 0 | 1 | 0 | 1 |
| CNAG_07505 | chr3 | 159574  | 161769  | 2195 | null | hypothetical protein CNAG_07505                             | 2 | 0 | 0 | 2 |
| CNAG_03027 | chr3 | 163293  | 165866  | 2573 | null | hypothetical protein CNAG_03027                             | 0 | 1 | 0 | 1 |
| CNAG_03024 | chr3 | 169916  | 179043  | 9127 | null | AGC protein kinase                                          | 0 | 1 | 1 | 2 |
| CNAG_03023 | chr3 | 179367  | 183887  | 4520 | null | hypothetical protein CNAG_03023                             | 1 | 0 | 0 | 1 |
| CNAG_03021 | chr3 | 186079  | 187177  | 1098 | null | hypothetical protein CNAG_03021                             | 1 | 0 | 0 | 1 |
| CNAG_03019 | chr3 | 190971  | 194264  | 3293 | null | long-chain acyl-CoA synthetase                              | 0 | 1 | 0 | 1 |

|            |      |        |        |      |       |                                              |   |   |   |   |
|------------|------|--------|--------|------|-------|----------------------------------------------|---|---|---|---|
| CNAG_03018 | chr3 | 194871 | 197973 | 3102 | null  | nuclear protein                              | 1 | 0 | 1 | 2 |
| CNAG_03016 | chr3 | 201565 | 202822 | 1257 | null  | chaperone regulator                          | 1 | 1 | 0 | 2 |
| CNAG_03015 | chr3 | 203560 | 204231 | 671  | null  | large subunit ribosomal protein L37-A        | 0 | 1 | 0 | 1 |
| CNAG_07968 | chr3 | 204592 | 205299 | 707  | null  | hypothetical protein CNAG_07968              | 1 | 1 | 0 | 2 |
| CNAG_03013 | chr3 | 210067 | 213646 | 3579 | null  | OPT family small oligopeptide transporter    | 0 | 2 | 1 | 3 |
| CNAG_03012 | chr3 | 214987 | 215316 | 329  | CQS1  | hypothetical protein CNAG_03012              | 0 | 3 | 0 | 3 |
| CNAG_03010 | chr3 | 220906 | 221961 | 1055 | null  | enoyl-CoA hydratase/isomerase                | 1 | 0 | 0 | 1 |
| CNAG_03006 | chr3 | 226673 | 228241 | 1568 | null  | hypothetical protein CNAG_03006              | 1 | 0 | 0 | 1 |
| CNAG_03005 | chr3 | 228528 | 230400 | 1872 | null  | cytoplasmic tRNA 2-thiolation protein 2      | 1 | 0 | 0 | 1 |
| CNAG_03000 | chr3 | 237769 | 238595 | 826  | null  | small subunit ribosomal protein S19e         | 0 | 0 | 1 | 1 |
| CNAG_02998 | chr3 | 242767 | 245370 | 2603 | null  | nuclear protein                              | 1 | 0 | 0 | 1 |
| CNAG_02996 | chr3 | 250219 | 251873 | 1654 | null  | flavoprotein oxygenase                       | 1 | 0 | 1 | 2 |
| CNAG_02994 | chr3 | 254194 | 256955 | 2761 | null  | hypothetical protein CNAG_02994              | 0 | 1 | 1 | 2 |
| CNAG_02992 | chr3 | 259219 | 262340 | 3121 | null  | actin cross-linking protein                  | 1 | 0 | 0 | 1 |
| CNAG_02987 | chr3 | 271663 | 272151 | 488  | null  | hypothetical protein CNAG_02987              | 0 | 1 | 1 | 2 |
| CNAG_02986 | chr3 | 272800 | 273842 | 1042 | YSA1  | ADP-ribose pyrophosphatase                   | 0 | 1 | 0 | 1 |
| CNAG_02982 | chr3 | 281012 | 284130 | 3118 | null  | U3 small nucleolar RNA-associated protein 13 | 0 | 1 | 0 | 1 |
| CNAG_02981 | chr3 | 284939 | 289349 | 4410 | null  | paired amphipathic helix protein Sin3a       | 0 | 0 | 2 | 2 |
| CNAG_02980 | chr3 | 289651 | 291374 | 1723 | null  | membrane dipeptidase                         | 0 | 4 | 0 | 4 |
| CNAG_02979 | chr3 | 291696 | 292554 | 858  | null  | hypothetical protein CNAG_02979              | 0 | 2 | 0 | 2 |
| CNAG_02977 | chr3 | 293809 | 299197 | 5388 | null  | metal resistance protein ycf1                | 0 | 2 | 1 | 3 |
| CNAG_02976 | chr3 | 299807 | 300857 | 1050 | null  | riboflavin kinase                            | 0 | 0 | 1 | 1 |
| CNAG_02973 | chr3 | 304991 | 307000 | 2009 | null  | tRNA-splicing endonuclease subunit Sen2      | 1 | 0 | 1 | 2 |
| CNAG_07506 | chr3 | 308419 | 312400 | 3981 | null  | transcriptional repressor NF-X1              | 0 | 0 | 1 | 1 |
| CNAG_02966 | chr3 | 321349 | 323321 | 1972 | null  | carboxypeptidase                             | 0 | 0 | 1 | 1 |
| CNAG_02958 | chr3 | 340928 | 343460 | 2532 | CFO2  | ferroxidase                                  | 0 | 0 | 1 | 1 |
| CNAG_07508 | chr3 | 343722 | 346389 | 2667 | null  | hypothetical protein CNAG_07508              | 1 | 1 | 0 | 2 |
| CNAG_02953 | chr3 | 354734 | 359365 | 4631 | null  | tuberin                                      | 0 | 1 | 0 | 1 |
| CNAG_02952 | chr3 | 359857 | 360316 | 459  | null  | hypothetical protein CNAG_02952              | 0 | 1 | 0 | 1 |
| CNAG_02935 | chr3 | 408450 | 409860 | 1410 | null  | malonic semialdehyde reductase               | 1 | 0 | 0 | 1 |
| CNAG_02930 | chr3 | 418733 | 424166 | 5433 | LIV10 | hypothetical protein CNAG_02930              | 0 | 1 | 0 | 1 |
| CNAG_02928 | chr3 | 429945 | 431085 | 1140 | null  | large subunit ribosomal protein L5e          | 0 | 1 | 0 | 1 |
| CNAG_02918 | chr3 | 451551 | 453152 | 1601 | ERG10 | acetyl-CoA C-acetyltransferase               | 0 | 3 | 0 | 3 |
| CNAG_02914 | chr3 | 461120 | 461690 | 570  | null  | hypothetical protein CNAG_02914              | 0 | 1 | 0 | 1 |
| CNAG_02912 | chr3 | 464580 | 470233 | 5653 | null  | hypothetical protein CNAG_02912              | 1 | 0 | 1 | 2 |
| CNAG_07513 | chr3 | 475748 | 483235 | 7487 | null  | hypothetical protein CNAG_07513              | 2 | 0 | 2 | 4 |
| CNAG_02902 | chr3 | 491291 | 493345 | 2054 | null  | hypothetical protein CNAG_02902              | 0 | 1 | 0 | 1 |
| CNAG_02900 | chr3 | 496093 | 497574 | 1481 | null  | hypothetical protein CNAG_02900              | 1 | 0 | 0 | 1 |
| CNAG_02897 | chr3 | 502414 | 506263 | 3849 | null  | inositol hexaphosphate kinase 1              | 1 | 0 | 0 | 1 |
| CNAG_02895 | chr3 | 509518 | 512528 | 3010 | null  | dynamain GTPase                              | 0 | 1 | 0 | 1 |
| CNAG_07514 | chr3 | 523749 | 528930 | 5181 | null  | Sec7 domain-containing protein               | 0 | 0 | 1 | 1 |
| CNAG_02886 | chr3 | 529599 | 530477 | 878  | null  | 20S proteasome subunit beta 4                | 0 | 1 | 0 | 1 |
| CNAG_02885 | chr3 | 530663 | 532716 | 2053 | CAP64 | capsular associated protein                  | 0 | 1 | 0 | 1 |
| CNAG_02882 | chr3 | 538335 | 540967 | 2632 | null  | hypothetical protein CNAG_02882              | 0 | 0 | 1 | 1 |
| CNAG_02878 | chr3 | 546042 | 547552 | 1510 | null  | hypothetical protein CNAG_02878              | 1 | 0 | 0 | 1 |
| CNAG_02877 | chr3 | 547943 | 550950 | 3007 | null  | hypothetical protein CNAG_02877              | 0 | 1 | 0 | 1 |
| CNAG_02876 | chr3 | 554303 | 556055 | 1752 | null  | ornithine decarboxylase                      | 1 | 0 | 0 | 1 |

|            |      |        |        |      |       |                                                     |   |   |   |   |
|------------|------|--------|--------|------|-------|-----------------------------------------------------|---|---|---|---|
| CNAG_02874 | chr3 | 558511 | 560817 | 2306 | null  | hypothetical protein CNAG_02874                     | 1 | 0 | 0 | 1 |
| CNAG_02871 | chr3 | 563939 | 565364 | 1425 | null  | GPI mannosyltransferase 2                           | 1 | 1 | 0 | 2 |
| CNAG_02870 | chr3 | 565694 | 567528 | 1834 | MET7  | folylpolyglutamate synthase                         | 0 | 0 | 2 | 2 |
| CNAG_02869 | chr3 | 568106 | 569325 | 1219 | null  | hypothetical protein CNAG_02869                     | 1 | 0 | 0 | 1 |
| CNAG_02868 | chr3 | 569838 | 571647 | 1809 | null  | tryptophan 2,3-dioxygenase                          | 1 | 1 | 0 | 2 |
| CNAG_02867 | chr3 | 571915 | 574220 | 2305 | PLC1  | phosphatidylinositol phospholipase C, delta         | 0 | 1 | 1 | 2 |
| CNAG_02866 | chr3 | 575711 | 577623 | 1912 | null  | pantothenate kinase                                 | 0 | 1 | 0 | 1 |
| CNAG_02862 | chr3 | 584703 | 585766 | 1063 | null  | aprataxin                                           | 0 | 0 | 1 | 1 |
| CNAG_02861 | chr3 | 585936 | 587108 | 1172 | null  | histidinol-phosphatase (PHP family)                 | 0 | 1 | 0 | 1 |
| CNAG_02860 | chr3 | 587686 | 589359 | 1673 | EBG1  | endo-1,3(4)-beta-glucanase                          | 0 | 1 | 0 | 1 |
| CNAG_02858 | chr3 | 593524 | 595077 | 1553 | ADE12 | adenylosuccinate synthetase                         | 0 | 1 | 0 | 1 |
| CNAG_02857 | chr3 | 595927 | 598628 | 2701 | null  | hypothetical protein CNAG_02857                     | 0 | 0 | 1 | 1 |
| CNAG_02856 | chr3 | 599657 | 603445 | 3788 | null  | potassium ion transporter                           | 0 | 1 | 0 | 1 |
| CNAG_07515 | chr3 | 606771 | 607159 | 388  | null  | hypothetical protein CNAG_07515                     | 0 | 1 | 0 | 1 |
| CNAG_02853 | chr3 | 609351 | 611437 | 2086 | null  | amidophosphoribosyltransferase                      | 0 | 1 | 0 | 1 |
| CNAG_02850 | chr3 | 616119 | 618961 | 2842 | null  | glucan endo-1,3-alpha-glucosidase agn1              | 0 | 0 | 1 | 1 |
| CNAG_02849 | chr3 | 620274 | 621973 | 1699 | null  | glutathione transferase                             | 0 | 1 | 0 | 1 |
| CNAG_02846 | chr3 | 627835 | 628825 | 990  | null  | endoplasmic reticulum protein                       | 0 | 1 | 0 | 1 |
| CNAG_07518 | chr3 | 648083 | 648775 | 692  | null  | ribonuclease P/MRP protein subunit POP5             | 1 | 0 | 0 | 1 |
| CNAG_07519 | chr3 | 651365 | 653839 | 2474 | null  | hypothetical protein CNAG_07519                     | 1 | 0 | 0 | 1 |
| CNAG_02834 | chr3 | 654633 | 660773 | 6140 | null  | sterol 3-beta-glucosyltransferase                   | 2 | 0 | 0 | 2 |
| CNAG_02833 | chr3 | 661078 | 661587 | 509  | null  | NADH dehydrogenase (ubiquinone) 1 beta subcomplex 7 | 0 | 1 | 1 | 2 |
| CNAG_02829 | chr3 | 666913 | 669761 | 2848 | null  | protein arginine N-methyltransferase 5              | 1 | 0 | 1 | 2 |
| CNAG_02828 | chr3 | 670025 | 673916 | 3891 | null  | hypothetical protein CNAG_02828                     | 0 | 0 | 1 | 1 |
| CNAG_07521 | chr3 | 679391 | 680522 | 1131 | null  | hypothetical protein CNAG_07521                     | 0 | 1 | 0 | 1 |
| CNAG_02824 | chr3 | 680662 | 682542 | 1880 | null  | hypothetical protein CNAG_02824                     | 1 | 1 | 0 | 2 |
| CNAG_02823 | chr3 | 682979 | 687313 | 4334 | null  | bloom syndrome protein                              | 0 | 0 | 1 | 1 |
| CNAG_02822 | chr3 | 690055 | 692624 | 2569 | null  | hypothetical protein CNAG_02822                     | 0 | 1 | 0 | 1 |
| CNAG_02821 | chr3 | 693145 | 694240 | 1095 | null  | hypothetical protein CNAG_02821                     | 1 | 0 | 0 | 1 |
| CNAG_02820 | chr3 | 694530 | 697611 | 3081 | null  | serine/threonine protein kinase                     | 0 | 0 | 1 | 1 |
| CNAG_02816 | chr3 | 703591 | 706829 | 3238 | null  | nuclear pore complex protein Nup93                  | 1 | 0 | 0 | 1 |
| CNAG_02814 | chr3 | 710187 | 713045 | 2858 | null  | glycerol-3-phosphate dehydrogenase                  | 0 | 0 | 1 | 1 |
| CNAG_02813 | chr3 | 713735 | 714091 | 356  | null  | large subunit ribosomal protein L30                 | 0 | 2 | 0 | 2 |
| CNAG_02810 | chr3 | 718237 | 721401 | 3164 | PUF4  | pumilio-family RNA binding protein                  | 0 | 1 | 0 | 1 |
| CNAG_02809 | chr3 | 722162 | 724328 | 2166 | null  | tRNA-specific adenosine deaminase 3                 | 0 | 2 | 0 | 2 |
| CNAG_07522 | chr3 | 724656 | 727126 | 2470 | null  | hypothetical protein CNAG_07522                     | 1 | 0 | 0 | 1 |
| CNAG_02805 | chr3 | 730909 | 732084 | 1175 | CAN1  | carbonic anhydrase                                  | 1 | 0 | 0 | 1 |
| CNAG_02801 | chr3 | 737916 | 738395 | 479  | TRX1  | thioredoxin                                         | 0 | 2 | 0 | 2 |
| CNAG_02800 | chr3 | 740099 | 742134 | 2035 | null  | hypothetical protein CNAG_02800                     | 1 | 0 | 0 | 1 |
| CNAG_02798 | chr3 | 745033 | 746303 | 1270 | null  | hypothetical protein CNAG_02798                     | 0 | 1 | 0 | 1 |
| CNAG_02796 | chr3 | 748810 | 751177 | 2367 | null  | 3-deoxy-7-phosphoheptulonate synthase               | 0 | 0 | 1 | 1 |
| CNAG_02794 | chr3 | 752230 | 753995 | 1765 | null  | dihydroorotate dehydrogenase (fumarate)             | 0 | 1 | 1 | 2 |
| CNAG_02790 | chr3 | 760517 | 761891 | 1374 | null  | galactinol synthase                                 | 1 | 0 | 0 | 1 |
| CNAG_02789 | chr3 | 762163 | 764383 | 2220 | null  | nitrogen permease regulator 2                       | 0 | 1 | 0 | 1 |
| CNAG_02787 | chr3 | 766380 | 767417 | 1037 | null  | dephospho-CoA kinase                                | 0 | 0 | 2 | 2 |
| CNAG_02784 | chr3 | 772889 | 774819 | 1930 | null  | methyltransferase                                   | 1 | 0 | 0 | 1 |
| CNAG_02783 | chr3 | 775278 | 775961 | 683  | null  | hypothetical protein CNAG_02783                     | 0 | 1 | 0 | 1 |

|            |      |         |         |      |       |                                                           |   |   |   |   |
|------------|------|---------|---------|------|-------|-----------------------------------------------------------|---|---|---|---|
| CNAG_02782 | chr3 | 776653  | 778280  | 1627 | null  | cytoplasmic protein                                       | 0 | 1 | 0 | 1 |
| CNAG_02779 | chr3 | 782657  | 783830  | 1173 | BNA6  | nicotinate-nucleotide diphosphorylase (carboxylating)     | 1 | 0 | 0 | 1 |
| CNAG_02774 | chr3 | 795298  | 798346  | 3048 | null  | hypothetical protein CNAG_02774                           | 0 | 1 | 0 | 1 |
| CNAG_02754 | chr3 | 839792  | 840350  | 558  | null  | small subunit ribosomal protein S12e                      | 0 | 2 | 0 | 2 |
| CNAG_02753 | chr3 | 840610  | 841657  | 1047 | LIV13 | endoplasmic reticulum protein                             | 0 | 1 | 0 | 1 |
| CNAG_02752 | chr3 | 842066  | 843445  | 1379 | null  | short-chain dehydrogenase                                 | 0 | 2 | 0 | 2 |
| CNAG_02745 | chr3 | 856228  | 859574  | 3346 | DCR2  | hypothetical protein CNAG_02745                           | 1 | 0 | 1 | 2 |
| CNAG_02742 | chr3 | 863625  | 866936  | 3311 | DCR1  | hypothetical protein CNAG_02742                           | 3 | 1 | 0 | 4 |
| CNAG_02739 | chr3 | 871611  | 872618  | 1007 | null  | hypothetical protein CNAG_02739                           | 0 | 1 | 0 | 1 |
| CNAG_07524 | chr3 | 883001  | 887280  | 4279 | null  | AMP deaminase                                             | 0 | 1 | 0 | 1 |
| CNAG_02726 | chr3 | 895869  | 897240  | 1371 | null  | cytoplasmic protein                                       | 0 | 1 | 0 | 1 |
| CNAG_02724 | chr3 | 900407  | 902986  | 2579 | null  | hypothetical protein CNAG_02724                           | 0 | 2 | 0 | 2 |
| CNAG_02721 | chr3 | 908292  | 913363  | 5071 | null  | leucine repeat containing protein                         | 1 | 0 | 0 | 1 |
| CNAG_02720 | chr3 | 913720  | 915992  | 2272 | null  | nuclear GTP-binding protein                               | 0 | 0 | 1 | 1 |
| CNAG_02719 | chr3 | 919194  | 920123  | 929  | null  | hypothetical protein CNAG_02719                           | 0 | 1 | 0 | 1 |
| CNAG_02714 | chr3 | 934045  | 935060  | 1015 | null  | elongation factor 1-beta                                  | 0 | 1 | 0 | 1 |
| CNAG_02708 | chr3 | 947499  | 949483  | 1984 | null  | prenylcysteine oxidase/farnesylcysteine lyase             | 0 | 1 | 0 | 1 |
| CNAG_02705 | chr3 | 953836  | 955693  | 1857 | null  | hypothetical protein CNAG_02705                           | 0 | 1 | 0 | 1 |
| CNAG_07525 | chr3 | 958088  | 958410  | 322  | null  | hypothetical protein CNAG_07525                           | 1 | 0 | 0 | 1 |
| CNAG_02702 | chr3 | 964531  | 968031  | 3500 | CLC1  | chloride channel protein                                  | 0 | 0 | 1 | 1 |
| CNAG_02701 | chr3 | 968296  | 970302  | 2006 | null  | hypothetical protein CNAG_02701                           | 0 | 0 | 1 | 1 |
| CNAG_02700 | chr3 | 971147  | 976289  | 5142 | null  | hypothetical protein CNAG_02700                           | 0 | 1 | 2 | 3 |
| CNAG_02698 | chr3 | 982804  | 985910  | 3106 | null  | hypothetical protein CNAG_02698                           | 1 | 0 | 0 | 1 |
| CNAG_02696 | chr3 | 989903  | 994294  | 4391 | null  | exocyst protein                                           | 0 | 1 | 0 | 1 |
| CNAG_02691 | chr3 | 1006194 | 1007512 | 1318 | null  | hypothetical protein CNAG_02691                           | 0 | 1 | 0 | 1 |
| CNAG_07527 | chr3 | 1011025 | 1012866 | 1841 | null  | alpha-1,6-mannosyltransferase                             | 0 | 0 | 1 | 1 |
| CNAG_02688 | chr3 | 1012919 | 1013995 | 1076 | null  | hypothetical protein CNAG_02688                           | 0 | 1 | 0 | 1 |
| CNAG_02687 | chr3 | 1014238 | 1015390 | 1152 | null  | hypothetical protein CNAG_02687                           | 1 | 1 | 0 | 2 |
| CNAG_02686 | chr3 | 1015753 | 1018781 | 3028 | null  | cystathionine beta-lyase                                  | 0 | 1 | 0 | 1 |
| CNAG_02682 | chr3 | 1031882 | 1035603 | 3721 | null  | hypothetical protein CNAG_02682                           | 1 | 0 | 0 | 1 |
| CNAG_02678 | chr3 | 1046719 | 1048071 | 1352 | null  | hypothetical protein CNAG_02678                           | 0 | 1 | 0 | 1 |
| CNAG_02675 | chr3 | 1052864 | 1056306 | 3442 | null  | CAMK/CAMKL/GIN4 protein kinase                            | 0 | 1 | 0 | 1 |
| CNAG_02672 | chr3 | 1061545 | 1063506 | 1961 | null  | nonsense-mediated mRNA decay protein 3                    | 0 | 1 | 0 | 1 |
| CNAG_02671 | chr3 | 1063862 | 1066707 | 2845 | null  | pre-mRNA-splicing factor CEF1                             | 0 | 1 | 0 | 1 |
| CNAG_02670 | chr3 | 1067198 | 1069493 | 2295 | null  | bud emergence protein 1                                   | 2 | 2 | 1 | 5 |
| CNAG_07528 | chr3 | 1070630 | 1072131 | 1501 | null  | hypothetical protein CNAG_07528                           | 2 | 0 | 0 | 2 |
| CNAG_02667 | chr3 | 1072493 | 1074865 | 2372 | null  | hypothetical protein CNAG_02667                           | 1 | 0 | 0 | 1 |
| CNAG_02663 | chr3 | 1083642 | 1085388 | 1746 | null  | ribonucleoside-diphosphate reductase subunit M2           | 0 | 1 | 0 | 1 |
| CNAG_02661 | chr3 | 1091888 | 1093184 | 1296 | null  | hypothetical protein CNAG_02661                           | 2 | 0 | 0 | 2 |
| CNAG_02658 | chr3 | 1098942 | 1101345 | 2403 | null  | hypothetical protein CNAG_02658                           | 1 | 0 | 1 | 2 |
| CNAG_02657 | chr3 | 1106965 | 1108197 | 1232 | null  | translation initiation factor 3 subunit G                 | 1 | 0 | 0 | 1 |
| CNAG_02654 | chr3 | 1111497 | 1118965 | 7468 | null  | DNA polymerase epsilon catalytic subunit A                | 1 | 0 | 1 | 2 |
| CNAG_07530 | chr3 | 1121512 | 1125359 | 3847 | null  | hypothetical protein CNAG_07530                           | 2 | 0 | 2 | 4 |
| CNAG_07531 | chr3 | 1125506 | 1126545 | 1039 | null  | pyridoxal 5'-phosphate synthase, glutaminase subunit Pdx2 | 0 | 0 | 1 | 1 |
| CNAG_07534 | chr3 | 1129762 | 1134299 | 4537 | null  | hypothetical protein CNAG_07534                           | 1 | 0 | 1 | 2 |
| CNAG_07537 | chr3 | 1137033 | 1138600 | 1567 | null  | mitochondrial GTPase 1                                    | 1 | 0 | 0 | 1 |
| CNAG_07538 | chr3 | 1138764 | 1141131 | 2367 | null  | calcium/proton exchanger                                  | 1 | 1 | 1 | 3 |

|            |      |         |         |      |       |                                                     |   |   |   |   |
|------------|------|---------|---------|------|-------|-----------------------------------------------------|---|---|---|---|
| CNAG_07539 | chr3 | 1141959 | 1145910 | 3951 | null  | replication factor C subunit 1                      | 0 | 1 | 0 | 1 |
| CNAG_07541 | chr3 | 1152503 | 1153579 | 1076 | null  | proteasome assembly chaperone 2                     | 1 | 1 | 0 | 2 |
| CNAG_07542 | chr3 | 1154045 | 1155441 | 1396 | null  | hypothetical protein CNAG_07542                     | 0 | 1 | 0 | 1 |
| CNAG_07548 | chr3 | 1167887 | 1169216 | 1329 | null  | cytoplasmic protein                                 | 1 | 0 | 0 | 1 |
| CNAG_07553 | chr3 | 1187112 | 1189928 | 2816 | null  | polycomb protein e(z)                               | 0 | 1 | 0 | 1 |
| CNAG_07108 | chr3 | 1192668 | 1197066 | 4398 | null  | tip120-family protein                               | 1 | 0 | 0 | 1 |
| CNAG_07555 | chr3 | 1198130 | 1200003 | 1873 | null  | hypothetical protein CNAG_07555                     | 0 | 0 | 1 | 1 |
| CNAG_07557 | chr3 | 1202311 | 1203106 | 795  | null  | ATP-binding cassette transporter                    | 0 | 1 | 0 | 1 |
| CNAG_07561 | chr3 | 1209055 | 1211133 | 2078 | null  | 6-phosphogluconate dehydrogenase, decarboxylating 1 | 0 | 1 | 0 | 1 |
| CNAG_07564 | chr3 | 1219253 | 1221622 | 2369 | null  | hypothetical protein CNAG_07564                     | 0 | 0 | 1 | 1 |
| CNAG_07566 | chr3 | 1223107 | 1225525 | 2418 | null  | hypothetical protein CNAG_07566                     | 1 | 1 | 0 | 2 |
| CNAG_07567 | chr3 | 1225741 | 1226968 | 1227 | null  | hypothetical protein CNAG_07567                     | 0 | 1 | 0 | 1 |
| CNAG_07970 | chr3 | 1227127 | 1229427 | 2300 | null  | crossover junction endonuclease EME1                | 1 | 0 | 0 | 1 |
| CNAG_07570 | chr3 | 1229698 | 1230607 | 909  | null  | prenylated SNARE protein Ykt6p                      | 0 | 1 | 0 | 1 |
| CNAG_07572 | chr3 | 1233865 | 1235975 | 2110 | ELP3  | elongator complex protein 3                         | 0 | 1 | 0 | 1 |
| CNAG_02603 | chr3 | 1252670 | 1254831 | 2161 | null  | early growth response protein 1                     | 0 | 0 | 1 | 1 |
| CNAG_02600 | chr3 | 1258840 | 1260846 | 2006 | null  | tartrate transporter                                | 0 | 2 | 0 | 2 |
| CNAG_02598 | chr3 | 1262794 | 1264647 | 1853 | CHI21 | chitinase                                           | 0 | 4 | 0 | 4 |
| CNAG_02597 | chr3 | 1265342 | 1267499 | 2157 | null  | hypothetical protein CNAG_02597                     | 0 | 1 | 0 | 1 |
| CNAG_02596 | chr3 | 1268321 | 1268928 | 607  | null  | hypothetical protein CNAG_02596                     | 1 | 0 | 0 | 1 |
| CNAG_02595 | chr3 | 1269576 | 1271694 | 2118 | null  | hypothetical protein CNAG_02595                     | 0 | 1 | 0 | 1 |
| CNAG_02594 | chr3 | 1272594 | 1274900 | 2306 | null  | hypothetical protein CNAG_02594                     | 2 | 0 | 0 | 2 |
| CNAG_02593 | chr3 | 1277117 | 1279712 | 2595 | null  | hypothetical protein CNAG_02593                     | 1 | 2 | 0 | 3 |
| CNAG_02590 | chr3 | 1283994 | 1286080 | 2086 | null  | 3-hydroxyisobutyrate dehydrogenase                  | 0 | 1 | 0 | 1 |
| CNAG_02588 | chr3 | 1290204 | 1293033 | 2829 | null  | avenacinase                                         | 1 | 0 | 0 | 1 |
| CNAG_02586 | chr3 | 1297973 | 1300246 | 2273 | null  | sugar transporter                                   | 1 | 0 | 0 | 1 |
| CNAG_02579 | chr3 | 1313768 | 1318691 | 4923 | null  | hypothetical protein CNAG_02579                     | 0 | 0 | 1 | 1 |
| CNAG_02574 | chr3 | 1329506 | 1333595 | 4089 | null  | cofactor D                                          | 4 | 1 | 0 | 5 |
| CNAG_07574 | chr3 | 1337863 | 1338207 | 344  | null  | hypothetical protein CNAG_07574                     | 1 | 0 | 0 | 1 |
| CNAG_07575 | chr3 | 1339252 | 1340005 | 753  | null  | hypothetical protein CNAG_07575                     | 1 | 0 | 0 | 1 |
| CNAG_02568 | chr3 | 1344066 | 1349237 | 5171 | null  | UBA/TS-N domain-containing protein                  | 3 | 0 | 1 | 4 |
| CNAG_02567 | chr3 | 1349411 | 1350346 | 935  | null  | hypothetical protein CNAG_02567                     | 0 | 1 | 0 | 1 |
| CNAG_02566 | chr3 | 1351585 | 1354444 | 2859 | null  | hepatocyte nuclear factor                           | 2 | 0 | 0 | 2 |
| CNAG_02562 | chr3 | 1363696 | 1365992 | 2296 | null  | acyl-CoA dehydrogenase                              | 0 | 1 | 0 | 1 |
| CNAG_07971 | chr3 | 1366526 | 1366936 | 410  | null  | hypothetical protein CNAG_07971                     | 0 | 2 | 0 | 2 |
| CNAG_02561 | chr3 | 1368380 | 1370391 | 2011 | null  | spermine transporter                                | 0 | 1 | 0 | 1 |
| CNAG_07972 | chr3 | 1373905 | 1374861 | 956  | null  | hypothetical protein CNAG_07972                     | 0 | 3 | 0 | 3 |
| CNAG_06881 | chr3 | 1412227 | 1413220 | 993  | null  | SBDS family rRNA metabolism protein                 | 0 | 1 | 0 | 1 |
| CNAG_06882 | chr3 | 1413437 | 1413904 | 467  | null  | hypothetical protein CNAG_06882                     | 0 | 1 | 0 | 1 |
| CNAG_07580 | chr3 | 1422354 | 1426421 | 4067 | null  | CAMK protein kinase                                 | 0 | 0 | 1 | 1 |
| CNAG_06889 | chr3 | 1431670 | 1433335 | 1665 | null  | sodium-hydrogen antiporter                          | 0 | 4 | 0 | 4 |
| CNAG_06890 | chr3 | 1434628 | 1437056 | 2428 | null  | membrane transporter                                | 1 | 4 | 0 | 5 |
| CNAG_06891 | chr3 | 1439204 | 1440114 | 910  | null  | hypothetical protein CNAG_06891                     | 0 | 1 | 0 | 1 |
| CNAG_06892 | chr3 | 1440427 | 1442012 | 1585 | null  | preconditioning-inducible protein                   | 0 | 0 | 1 | 1 |
| CNAG_06893 | chr3 | 1442238 | 1443480 | 1242 | null  | hypothetical protein CNAG_06893                     | 0 | 3 | 0 | 3 |
| CNAG_06895 | chr3 | 1444887 | 1445696 | 809  | null  | hypothetical protein CNAG_06895                     | 0 | 0 | 2 | 2 |
| CNAG_06910 | chr3 | 1493211 | 1494402 | 1191 | null  | beta-lactamase                                      | 0 | 1 | 0 | 1 |

|            |      |         |         |      |      |                                                |   |   |   |   |
|------------|------|---------|---------|------|------|------------------------------------------------|---|---|---|---|
| CNAG_06925 | chr3 | 1533629 | 1535516 | 1887 | null | arsenical-resistance protein                   | 1 | 0 | 0 | 1 |
| CNAG_06926 | chr3 | 1535940 | 1539122 | 3182 | null | hypothetical protein CNAG_06926                | 0 | 3 | 1 | 4 |
| CNAG_06927 | chr3 | 1540111 | 1542239 | 2128 | null | peptidyl-prolyl isomerase G (cyclophilin G)    | 2 | 0 | 0 | 2 |
| CNAG_06928 | chr3 | 1542773 | 1546689 | 3916 | null | hypothetical protein CNAG_06928                | 2 | 3 | 0 | 5 |
| CNAG_06929 | chr3 | 1547282 | 1550105 | 2823 | null | IQ domain-containing GTPase activating protein | 0 | 0 | 1 | 1 |
| CNAG_06930 | chr3 | 1551213 | 1551785 | 572  | null | hypothetical protein CNAG_06930                | 0 | 1 | 0 | 1 |
| CNAG_06931 | chr3 | 1553308 | 1556158 | 2850 | null | beta-glucosidase                               | 0 | 1 | 0 | 1 |
| CNAG_07583 | chr3 | 1558846 | 1561544 | 2698 | null | hypothetical protein CNAG_07583                | 0 | 2 | 0 | 2 |
| CNAG_06934 | chr3 | 1562223 | 1564413 | 2190 | null | hexose transporter protein                     | 1 | 2 | 3 | 6 |
| CNAG_06936 | chr3 | 1568423 | 1571422 | 2999 | null | beta-glucosidase                               | 0 | 0 | 1 | 1 |
| CNAG_04932 | chr4 | 10120   | 12222   | 2102 | null | hypothetical protein CNAG_04932                | 0 | 0 | 1 | 1 |
| CNAG_04935 | chr4 | 17510   | 18922   | 1412 | null | hypothetical protein CNAG_04935                | 0 | 1 | 0 | 1 |
| CNAG_07795 | chr4 | 36004   | 36603   | 599  | null | hypothetical protein CNAG_07795                | 0 | 2 | 0 | 2 |
| CNAG_04943 | chr4 | 40735   | 43906   | 3171 | null | CBS domain-containing protein                  | 0 | 2 | 1 | 3 |
| CNAG_04944 | chr4 | 46200   | 47727   | 1527 | null | hypothetical protein CNAG_04944                | 0 | 2 | 1 | 3 |
| CNAG_04946 | chr4 | 50213   | 52234   | 2021 | null | hypothetical protein CNAG_04946                | 0 | 0 | 1 | 1 |
| CNAG_04947 | chr4 | 53252   | 55084   | 1832 | null | high-affinity nicotinic acid transporter       | 1 | 0 | 0 | 1 |
| CNAG_04949 | chr4 | 58197   | 59901   | 1704 | null | hypothetical protein CNAG_04949                | 0 | 1 | 1 | 2 |
| CNAG_04951 | chr4 | 61878   | 63276   | 1398 | null | 3-deoxy-7-phosphoheptulonate synthase          | 0 | 3 | 1 | 4 |
| CNAG_04952 | chr4 | 63998   | 64982   | 984  | null | ADP-ribosylation factor 6                      | 0 | 1 | 0 | 1 |
| CNAG_04953 | chr4 | 67011   | 68082   | 1071 | null | hypothetical protein CNAG_04953                | 0 | 1 | 0 | 1 |
| CNAG_04955 | chr4 | 73079   | 74559   | 1480 | null | oxidoreductase                                 | 0 | 1 | 1 | 2 |
| CNAG_04963 | chr4 | 93774   | 95312   | 1538 | null | hypothetical protein CNAG_04963                | 0 | 1 | 0 | 1 |
| CNAG_04967 | chr4 | 106657  | 108392  | 1735 | null | hypothetical protein CNAG_04967                | 1 | 0 | 1 | 2 |
| CNAG_04968 | chr4 | 109301  | 110977  | 1676 | null | hypothetical protein CNAG_04968                | 0 | 1 | 0 | 1 |
| CNAG_04970 | chr4 | 115198  | 116444  | 1246 | null | hypothetical protein CNAG_04970                | 1 | 2 | 0 | 3 |
| CNAG_07800 | chr4 | 116759  | 119764  | 3005 | null | syntaxin-binding protein 1                     | 1 | 0 | 0 | 1 |
| CNAG_04974 | chr4 | 125166  | 126901  | 1735 | null | hypothetical protein CNAG_04974                | 1 | 0 | 0 | 1 |
| CNAG_04989 | chr4 | 160924  | 162111  | 1187 | null | protein FRG1                                   | 0 | 0 | 1 | 1 |
| CNAG_04992 | chr4 | 171059  | 173815  | 2756 | null | hypothetical protein CNAG_04992                | 0 | 1 | 0 | 1 |
| CNAG_07802 | chr4 | 181736  | 183468  | 1732 | null | class III aminotransferase                     | 0 | 0 | 2 | 2 |
| CNAG_05000 | chr4 | 190648  | 193513  | 2865 | null | hypothetical protein CNAG_05000                | 1 | 1 | 0 | 2 |
| CNAG_05001 | chr4 | 193685  | 194793  | 1108 | null | hypothetical protein CNAG_05001                | 1 | 0 | 0 | 1 |
| CNAG_05005 | chr4 | 204147  | 207494  | 3347 | null | ULK/ULK protein kinase                         | 0 | 0 | 1 | 1 |
| CNAG_05008 | chr4 | 213563  | 214433  | 870  | null | hypothetical protein CNAG_05008                | 0 | 0 | 1 | 1 |
| CNAG_05009 | chr4 | 215088  | 216750  | 1662 | null | integral membrane protein                      | 0 | 0 | 1 | 1 |
| CNAG_05013 | chr4 | 226391  | 228877  | 2486 | null | RNP domain-containing protein                  | 1 | 0 | 0 | 1 |
| CNAG_05017 | chr4 | 235727  | 237978  | 2251 | null | GabA permease                                  | 0 | 1 | 1 | 2 |
| CNAG_05019 | chr4 | 240125  | 242641  | 2516 | null | hypothetical protein CNAG_05019                | 0 | 1 | 0 | 1 |
| CNAG_05026 | chr4 | 253643  | 254756  | 1113 | null | mango esterase                                 | 0 | 1 | 0 | 1 |
| CNAG_05037 | chr4 | 278579  | 279700  | 1121 | null | hypothetical protein CNAG_05037                | 1 | 0 | 0 | 1 |
| CNAG_05039 | chr4 | 281409  | 283556  | 2147 | null | hypothetical protein CNAG_05039                | 0 | 1 | 0 | 1 |
| CNAG_05041 | chr4 | 285064  | 285995  | 931  | null | NADH-ubiquinone oxidoreductase subunit 8       | 0 | 2 | 0 | 2 |
| CNAG_05042 | chr4 | 286205  | 288871  | 2666 | null | carnitine acetyltransferase                    | 1 | 0 | 0 | 1 |
| CNAG_05043 | chr4 | 290187  | 293185  | 2998 | null | hypothetical protein CNAG_05043                | 1 | 0 | 0 | 1 |
| CNAG_05046 | chr4 | 295976  | 297690  | 1714 | null | hypothetical protein CNAG_05046                | 1 | 0 | 0 | 1 |
| CNAG_07804 | chr4 | 298523  | 299112  | 589  | null | protein mgr2                                   | 0 | 1 | 0 | 1 |

|            |      |        |        |      |      |                                                                                             |   |   |   |    |
|------------|------|--------|--------|------|------|---------------------------------------------------------------------------------------------|---|---|---|----|
| CNAG_05049 | chr4 | 303877 | 306784 | 2907 | null | hypothetical protein CNAG_05049                                                             | 1 | 8 | 1 | 10 |
| CNAG_07806 | chr4 | 308594 | 310161 | 1567 | null | hypothetical protein CNAG_07806                                                             | 3 | 2 | 0 | 5  |
| CNAG_07807 | chr4 | 310772 | 311242 | 470  | null | histone H4                                                                                  | 0 | 2 | 0 | 2  |
| CNAG_05053 | chr4 | 311904 | 313883 | 1979 | null | hypothetical protein CNAG_05053                                                             | 4 | 0 | 3 | 7  |
| CNAG_05055 | chr4 | 314520 | 315733 | 1213 | null | DNA/RNA-binding protein KIN17                                                               | 0 | 0 | 1 | 1  |
| CNAG_05056 | chr4 | 316251 | 318711 | 2460 | null | hypothetical protein CNAG_05056                                                             | 0 | 0 | 2 | 2  |
| CNAG_05057 | chr4 | 318929 | 319989 | 1060 | null | hypothetical protein CNAG_05057                                                             | 0 | 0 | 1 | 1  |
| CNAG_05058 | chr4 | 321106 | 322772 | 1666 | null | GTPase                                                                                      | 0 | 1 | 0 | 1  |
| CNAG_05059 | chr4 | 322999 | 324723 | 1724 | null | pyruvate dehydrogenase E1 component subunit beta                                            | 0 | 1 | 0 | 1  |
| CNAG_05062 | chr4 | 330035 | 332667 | 2632 | PUT2 | hypothetical protein CNAG_05062                                                             | 1 | 0 | 0 | 1  |
| CNAG_05063 | chr4 | 332951 | 337782 | 4831 | SSK2 | STE/STE11/SSK protein kinase                                                                | 0 | 1 | 0 | 1  |
| CNAG_05064 | chr4 | 338852 | 340830 | 1978 | null | hypothetical protein CNAG_05064                                                             | 1 | 0 | 1 | 2  |
| CNAG_05066 | chr4 | 342075 | 342968 | 893  | null | hypothetical protein CNAG_05066                                                             | 3 | 4 | 1 | 8  |
| CNAG_05067 | chr4 | 343299 | 344709 | 1410 | null | hypothetical protein CNAG_05067                                                             | 1 | 0 | 0 | 1  |
| CNAG_05070 | chr4 | 350591 | 355120 | 4529 | null | sulfite reductase (NADPH) hemoprotein, beta-component                                       | 0 | 2 | 1 | 3  |
| CNAG_05072 | chr4 | 359287 | 361218 | 1931 | null | endopeptidase                                                                               | 1 | 0 | 1 | 2  |
| CNAG_07808 | chr4 | 363041 | 364493 | 1452 | null | alanine-glyoxylate transaminase/serine-glyoxylate transaminase/serine-pyruvate transaminase | 1 | 0 | 0 | 1  |
| CNAG_05074 | chr4 | 364960 | 368540 | 3580 | null | hypothetical protein CNAG_05074                                                             | 2 | 0 | 0 | 2  |
| CNAG_05075 | chr4 | 369285 | 371679 | 2394 | null | solute carrier family 20 (sodium-dependent phosphate transporter)                           | 1 | 1 | 2 | 4  |
| CNAG_05076 | chr4 | 372638 | 373673 | 1035 | null | hypothetical protein CNAG_05076                                                             | 1 | 1 | 0 | 2  |
| CNAG_05078 | chr4 | 379063 | 380909 | 1846 | null | tRNA \'-O-ribosylphosphate transferase                                                      | 1 | 0 | 0 | 1  |
| CNAG_05079 | chr4 | 381334 | 381640 | 306  | null | hypothetical protein CNAG_05079                                                             | 1 | 4 | 0 | 5  |
| CNAG_05084 | chr4 | 400452 | 403535 | 3083 | null | phospholipase A-2-activating protein                                                        | 1 | 0 | 1 | 2  |
| CNAG_05092 | chr4 | 417487 | 417930 | 443  | null | hypothetical protein CNAG_05092                                                             | 0 | 1 | 0 | 1  |
| CNAG_05093 | chr4 | 419046 | 420465 | 1419 | null | hypothetical protein CNAG_05093                                                             | 0 | 1 | 1 | 2  |
| CNAG_05096 | chr4 | 423624 | 425305 | 1681 | null | histone deacetylase 1/2                                                                     | 0 | 0 | 1 | 1  |
| CNAG_05111 | chr4 | 455799 | 456599 | 800  | null | hypothetical protein CNAG_05111                                                             | 1 | 0 | 0 | 1  |
| CNAG_05116 | chr4 | 470498 | 472762 | 2264 | null | DNA polymerase mu subunit                                                                   | 1 | 0 | 0 | 1  |
| CNAG_05120 | chr4 | 481882 | 483663 | 1781 | null | nicotinate phosphoribosyltransferase                                                        | 1 | 0 | 0 | 1  |
| CNAG_05124 | chr4 | 490981 | 494050 | 3069 | SEY1 | protein SEY1                                                                                | 1 | 0 | 1 | 2  |
| CNAG_05125 | chr4 | 494508 | 495818 | 1310 | null | diphosphomevalonate decarboxylase                                                           | 0 | 0 | 3 | 3  |
| CNAG_07812 | chr4 | 496075 | 496979 | 904  | null | hypothetical protein CNAG_07812                                                             | 0 | 3 | 0 | 3  |
| CNAG_05129 | chr4 | 500541 | 502358 | 1817 | null | hypothetical protein CNAG_05129                                                             | 1 | 0 | 0 | 1  |
| CNAG_05130 | chr4 | 503516 | 506168 | 2652 | null | hypothetical protein CNAG_05130                                                             | 0 | 2 | 0 | 2  |
| CNAG_05132 | chr4 | 507849 | 508616 | 767  | null | cytochrome c oxidase subunit 5b                                                             | 0 | 2 | 0 | 2  |
| CNAG_07815 | chr4 | 509408 | 512924 | 3516 | null | hypothetical protein CNAG_07815                                                             | 0 | 1 | 0 | 1  |
| CNAG_05134 | chr4 | 513249 | 515061 | 1812 | null | ornithine-oxo-acid transaminase                                                             | 0 | 0 | 1 | 1  |
| CNAG_05135 | chr4 | 515400 | 519102 | 3702 | PMR1 | Ca2 -transporting ATPase                                                                    | 0 | 2 | 0 | 2  |
| CNAG_05137 | chr4 | 524272 | 525082 | 810  | null | ER lumen protein retaining receptor                                                         | 0 | 1 | 0 | 1  |
| CNAG_05142 | chr4 | 541004 | 542639 | 1635 | null | dolichyl-P-Man:Man(5)GlcNAc(2)-PP-dolichyl mannosyltransferase                              | 0 | 1 | 0 | 1  |
| CNAG_05155 | chr4 | 575331 | 579175 | 3844 | PTP2 | protein-tyrosine-phosphatase                                                                | 1 | 0 | 0 | 1  |
| CNAG_05157 | chr4 | 584063 | 585667 | 1604 | null | hypothetical protein CNAG_05157                                                             | 1 | 0 | 0 | 1  |
| CNAG_05167 | chr4 | 608717 | 609108 | 391  | null | hypothetical protein CNAG_05167                                                             | 0 | 1 | 0 | 1  |
| CNAG_05169 | chr4 | 612267 | 614736 | 2469 | null | L-lactate dehydrogenase (cytochrome)                                                        | 0 | 1 | 0 | 1  |
| CNAG_05171 | chr4 | 620055 | 621219 | 1164 | null | CCR4-NOT transcription complex subunit 7/8                                                  | 0 | 1 | 0 | 1  |
| CNAG_05172 | chr4 | 621447 | 626221 | 4774 | null | myosin-1                                                                                    | 1 | 0 | 0 | 1  |
| CNAG_05176 | chr4 | 637755 | 639810 | 2055 | null | hypothetical protein CNAG_05176                                                             | 0 | 0 | 1 | 1  |



|                   |             |               |               |             |             |                                                                |          |           |           |           |
|-------------------|-------------|---------------|---------------|-------------|-------------|----------------------------------------------------------------|----------|-----------|-----------|-----------|
| CNAG_05178        | chr4        | 643572        | 644736        | 1164        | null        | hypothetical protein CNAG_05178                                | 0        | 2         | 0         | 2         |
| CNAG_05181        | chr4        | 652296        | 655892        | 3596        | BWC1        | white collar 1 protein                                         | 1        | 0         | 0         | 1         |
| CNAG_05185        | chr4        | 666198        | 667166        | 968         | null        | hypothetical protein CNAG_05185                                | 2        | 0         | 0         | 2         |
| CNAG_05187        | chr4        | 669989        | 672530        | 2541        | null        | hypothetical protein CNAG_05187                                | 1        | 0         | 0         | 1         |
| CNAG_05190        | chr4        | 677146        | 679665        | 2519        | null        | hypothetical protein CNAG_05190                                | 1        | 0         | 1         | 2         |
| CNAG_05191        | chr4        | 679785        | 682090        | 2305        | null        | hypothetical protein CNAG_05191                                | 0        | 0         | 1         | 1         |
| CNAG_05192        | chr4        | 683091        | 683787        | 696         | null        | hypothetical protein CNAG_05192                                | 0        | 1         | 0         | 1         |
| CNAG_05193        | chr4        | 684267        | 686109        | 1842        | null        | endoplasmic reticulum-Golgi intermediate compartment protein 2 | 0        | 0         | 1         | 1         |
| CNAG_05194        | chr4        | 686196        | 687772        | 1576        | null        | lipoyl synthase, mitochondrial                                 | 0        | 0         | 1         | 1         |
| CNAG_05195        | chr4        | 688303        | 692601        | 4298        | null        | ubiquitin-conjugation factor E4 B                              | 1        | 0         | 0         | 1         |
| CNAG_05199        | chr4        | 697238        | 699688        | 2450        | null        | chaperone DnaK                                                 | 0        | 1         | 0         | 1         |
| CNAG_05202        | chr4        | 706757        | 708652        | 1895        | null        | SET domain-containing protein 6                                | 0        | 2         | 0         | 2         |
| CNAG_05212        | chr4        | 748322        | 749539        | 1217        | null        | hypothetical protein CNAG_05212                                | 1        | 3         | 1         | 5         |
| CNAG_05218        | chr4        | 759395        | 761302        | 1907        | ACA1        | adenylyl cyclase-associated protein                            | 1        | 0         | 0         | 1         |
| CNAG_05221        | chr4        | 769364        | 770024        | 660         | null        | histone H2A.Z                                                  | 0        | 1         | 1         | 2         |
| CNAG_05222        | chr4        | 772148        | 773296        | 1148        | NRG1        | transcriptional regulator Nrg1                                 | 0        | 1         | 0         | 1         |
| CNAG_05231        | chr4        | 791421        | 795114        | 3693        | null        | nuclear protein                                                | 1        | 0         | 0         | 1         |
| CNAG_05233        | chr4        | 797015        | 800591        | 3576        | null        | hypothetical protein CNAG_05233                                | 1        | 1         | 1         | 3         |
| CNAG_05234        | chr4        | 801161        | 802491        | 1330        | null        | mitochondrial import inner membrane translocase subunit TIM54  | 0        | 1         | 0         | 1         |
| CNAG_05235        | chr4        | 802785        | 803830        | 1045        | null        | protein BMH2                                                   | 0        | 1         | 0         | 1         |
| CNAG_05242        | chr4        | 815463        | 819580        | 4117        | null        | hypothetical protein CNAG_05242                                | 1        | 0         | 0         | 1         |
| CNAG_05243        | chr4        | 820542        | 822630        | 2088        | null        | xylulokinase                                                   | 1        | 1         | 0         | 2         |
| CNAG_05244        | chr4        | 823296        | 825448        | 2152        | null        | hypothetical protein CNAG_05244                                | 0        | 2         | 1         | 3         |
| <b>CNAG_05245</b> | <b>chr4</b> | <b>829807</b> | <b>830546</b> | <b>739</b>  | <b>null</b> | <b>hypothetical protein CNAG_05245</b>                         | <b>0</b> | <b>20</b> | <b>0</b>  | <b>20</b> |
| <b>CNAG_05247</b> | <b>chr4</b> | <b>832949</b> | <b>834336</b> | <b>1387</b> | <b>SLC1</b> | <b>lysophosphatidate acyltransferase</b>                       | <b>1</b> | <b>6</b>  | <b>4</b>  | <b>11</b> |
| <b>CNAG_05248</b> | <b>chr4</b> | <b>834753</b> | <b>837513</b> | <b>2760</b> | <b>null</b> | <b>clathrin binding protein</b>                                | <b>2</b> | <b>0</b>  | <b>10</b> | <b>12</b> |
| CNAG_07976        | chr4        | 837936        | 839980        | 2044        | null        | hypothetical protein CNAG_07976                                | 1        | 0         | 0         | 1         |
| CNAG_05250        | chr4        | 842196        | 845206        | 3010        | null        | telomere maintenance protein                                   | 0        | 2         | 0         | 2         |
| CNAG_05251        | chr4        | 847184        | 848301        | 1117        | null        | hypothetical protein CNAG_05251                                | 0        | 0         | 2         | 2         |
| CNAG_05253        | chr4        | 850754        | 853253        | 2499        | null        | hypothetical protein CNAG_05253                                | 0        | 0         | 1         | 1         |
| CNAG_05265        | chr4        | 883176        | 883685        | 509         | null        | hypothetical protein CNAG_05265                                | 0        | 1         | 0         | 1         |
| CNAG_05268        | chr4        | 889302        | 890404        | 1102        | null        | hypothetical protein CNAG_05268                                | 0        | 2         | 0         | 2         |
| CNAG_05269        | chr4        | 890674        | 891711        | 1037        | null        | 20S proteasome subunit alpha 7                                 | 1        | 0         | 0         | 1         |
| CNAG_05277        | chr4        | 914359        | 915384        | 1025        | null        | vesicle-associated membrane protein 4                          | 0        | 4         | 0         | 4         |
| CNAG_05279        | chr4        | 919179        | 920373        | 1194        | null        | hypothetical protein CNAG_05279                                | 1        | 0         | 0         | 1         |
| CNAG_05284        | chr4        | 933269        | 935072        | 1803        | null        | hypothetical protein CNAG_05284                                | 1        | 0         | 0         | 1         |
| CNAG_05285        | chr4        | 935348        | 936641        | 1293        | null        | hypothetical protein CNAG_05285                                | 0        | 1         | 0         | 1         |
| CNAG_05286        | chr4        | 936737        | 937461        | 724         | null        | hypothetical protein CNAG_05286                                | 0        | 1         | 0         | 1         |
| CNAG_05294        | chr4        | 963168        | 966186        | 3018        | null        | F-box and WD-40 domain-containing protein CDC4                 | 0        | 4         | 0         | 4         |
| CNAG_05301        | chr4        | 981421        | 984577        | 3156        | CRN1        | deoxyuridine 5\'-triphosphate nucleotidohydrolase              | 0        | 1         | 0         | 1         |
| CNAG_05306        | chr4        | 999579        | 1001988       | 2409        | null        | hypothetical protein CNAG_05306                                | 0        | 1         | 0         | 1         |
| CNAG_05307        | chr4        | 1002227       | 1005172       | 2945        | null        | beta-catenin-like protein 1                                    | 1        | 0         | 0         | 1         |
| CNAG_05308        | chr4        | 1005495       | 1010119       | 4624        | null        | beta-catenin-like protein 1                                    | 2        | 0         | 0         | 2         |
| CNAG_05309        | chr4        | 1011242       | 1013033       | 1791        | null        | hypothetical protein CNAG_05309                                | 0        | 1         | 0         | 1         |
| CNAG_05310        | chr4        | 1013505       | 1014760       | 1255        | null        | nipsnap family protein                                         | 1        | 0         | 1         | 2         |
| CNAG_05311        | chr4        | 1015086       | 1018217       | 3131        | null        | arsenite-resistant protein ASR2                                | 2        | 1         | 0         | 3         |
| CNAG_05312        | chr4        | 1018841       | 1020605       | 1764        | null        | hypothetical protein CNAG_05312                                | 0        | 1         | 1         | 2         |

|                   |             |              |              |             |             |                                                        |          |          |          |          |
|-------------------|-------------|--------------|--------------|-------------|-------------|--------------------------------------------------------|----------|----------|----------|----------|
| CNAG_05313        | chr4        | 1022725      | 1027663      | 4938        | null        | hypothetical protein CNAG_05313                        | 0        | 1        | 1        | 2        |
| CNAG_05314        | chr4        | 1028055      | 1029862      | 1807        | GLO3        | ADP-ribosylation factor GTPase-activating protein 2/3  | 0        | 2        | 4        | 6        |
| CNAG_05315        | chr4        | 1030558      | 1032411      | 1853        | null        | taurine catabolism dioxygenase TauD                    | 0        | 3        | 0        | 3        |
| CNAG_05316        | chr4        | 1036081      | 1037236      | 1155        | null        | inositol oxygenase                                     | 0        | 1        | 0        | 1        |
| CNAG_05319        | chr4        | 1044598      | 1045974      | 1376        | null        | hypothetical protein CNAG_05319                        | 0        | 1        | 0        | 1        |
| CNAG_07830        | chr4        | 1052247      | 1055092      | 2845        | null        | hypothetical protein CNAG_07830                        | 0        | 1        | 0        | 1        |
| CNAG_05325        | chr4        | 1059075      | 1060049      | 974         | null        | hypothetical protein CNAG_05325                        | 0        | 2        | 0        | 2        |
| CNAG_05326        | chr4        | 1061591      | 1062658      | 1067        | null        | hypothetical protein CNAG_05326                        | 3        | 0        | 0        | 3        |
| CNAG_07395        | chr5        | 2357         | 3284         | 927         | null        | hypothetical protein CNAG_07395                        | 0        | 1        | 0        | 1        |
| CNAG_06869        | chr5        | 28218        | 29485        | 1267        | null        | HPP family protein                                     | 1        | 0        | 0        | 1        |
| CNAG_06864        | chr5        | 37955        | 40559        | 2604        | null        | hypothetical protein CNAG_06864                        | 0        | 0        | 1        | 1        |
| CNAG_06863        | chr5        | 40787        | 41672        | 885         | null        | hypothetical protein CNAG_06863                        | 2        | 1        | 1        | 4        |
| CNAG_07978        | chr5        | 55498        | 61778        | 6280        | null        | hypothetical protein CNAG_07978                        | 0        | 1        | 0        | 1        |
| CNAG_07400        | chr5        | 75178        | 77551        | 2373        | null        | aspartate-tRNA(Asn) ligase                             | 0        | 1        | 0        | 1        |
| CNAG_06849        | chr5        | 77880        | 79456        | 1576        | null        | saccharopine dehydrogenase (NAD, L-lysine forming)     | 0        | 0        | 1        | 1        |
| CNAG_06847        | chr5        | 80480        | 81642        | 1162        | null        | small subunit ribosomal protein S28                    | 0        | 1        | 0        | 1        |
| CNAG_06846        | chr5        | 84959        | 85723        | 764         | null        | hypothetical protein CNAG_06846                        | 1        | 0        | 0        | 1        |
| CNAG_06845        | chr5        | 86262        | 91908        | 5646        | null        | STE/STE11/CDC15 protein kinase                         | 0        | 0        | 1        | 1        |
| CNAG_06844        | chr5        | 92004        | 92580        | 576         | null        | hypothetical protein CNAG_06844                        | 0        | 0        | 1        | 1        |
| <b>CNAG_07402</b> | <b>chr5</b> | <b>95502</b> | <b>98444</b> | <b>2942</b> | <b>null</b> | <b>pantothenate transporter</b>                        | <b>0</b> | <b>0</b> | <b>1</b> | <b>1</b> |
| CNAG_07403        | chr5        | 98745        | 102743       | 3998        | PEX1        | peroxin-1                                              | 0        | 0        | 1        | 1        |
| CNAG_06836        | chr5        | 115847       | 117615       | 1768        | null        | oxidoreductase                                         | 0        | 2        | 1        | 3        |
| CNAG_06834        | chr5        | 122649       | 125839       | 3190        | PMT1        | dolichyl-phosphate-mannose-protein mannosyltransferase | 1        | 1        | 1        | 3        |
| CNAG_06833        | chr5        | 126530       | 127742       | 1212        | null        | hypothetical protein CNAG_06833                        | 1        | 0        | 0        | 1        |
| CNAG_06831        | chr5        | 132300       | 133921       | 1621        | null        | hypothetical protein CNAG_06831                        | 1        | 0        | 0        | 1        |
| CNAG_06830        | chr5        | 134250       | 136975       | 2725        | null        | histidinol dehydrogenase                               | 0        | 3        | 0        | 3        |
| CNAG_06827        | chr5        | 144531       | 145721       | 1190        | null        | hypothetical protein CNAG_06827                        | 0        | 2        | 0        | 2        |
| CNAG_06826        | chr5        | 146447       | 148300       | 1853        | null        | hypothetical protein CNAG_06826                        | 3        | 0        | 0        | 3        |
| CNAG_06825        | chr5        | 148644       | 150362       | 1718        | null        | hypothetical protein CNAG_06825                        | 1        | 3        | 1        | 5        |
| CNAG_06824        | chr5        | 151236       | 153083       | 1847        | null        | hypothetical protein CNAG_06824                        | 0        | 2        | 0        | 2        |
| CNAG_06822        | chr5        | 154814       | 157479       | 2665        | null        | hypothetical protein CNAG_06822                        | 2        | 0        | 0        | 2        |
| CNAG_07405        | chr5        | 172163       | 174967       | 2804        | null        | hypothetical protein CNAG_07405                        | 0        | 1        | 0        | 1        |
| CNAG_06817        | chr5        | 178989       | 181172       | 2183        | UAP1        | NCS2 family nucleobase:cation symporter-2              | 1        | 0        | 0        | 1        |
| CNAG_06816        | chr5        | 182210       | 183288       | 1078        | null        | hypothetical protein CNAG_06816                        | 0        | 3        | 0        | 3        |
| CNAG_06813        | chr5        | 189844       | 192096       | 2252        | CAP1alpha   | hypothetical protein CNAG_06813                        | 0        | 1        | 1        | 2        |
| CNAG_06812        | chr5        | 194439       | 200633       | 6194        | SPO14alpha  | phospholipase D                                        | 1        | 0        | 0        | 1        |
| CNAG_06804        | chr5        | 215900       | 218759       | 2859        | BSP3        | hypothetical protein CNAG_06804                        | 1        | 1        | 0        | 2        |
| CNAG_06980        | chr5        | 233883       | 237873       | 3990        | STE11alpha  | STE/STE11 protein kinase                               | 0        | 1        | 1        | 2        |
| CNAG_07409        | chr5        | 238318       | 242691       | 4373        | RPO41alpha  | DNA-directed RNA polymerase, mitochondrial             | 0        | 0        | 1        | 1        |
| CNAG_07410        | chr5        | 248166       | 251116       | 2950        | CID1alpha   | hypothetical protein CNAG_07410                        | 0        | 3        | 0        | 3        |
| CNAG_07015        | chr5        | 252101       | 255269       | 3168        | null        | hypothetical protein CNAG_07015                        | 0        | 1        | 0        | 1        |
| CNAG_07411        | chr5        | 256901       | 262890       | 5989        | RUM1alpha   | histone demethylase JARID1                             | 1        | 0        | 0        | 1        |
| CNAG_01455        | chr5        | 270550       | 271048       | 498         | RPL39alpha  | large subunit ribosomal protein L39                    | 0        | 1        | 0        | 1        |
| CNAG_01443        | chr5        | 296646       | 298152       | 1506        | null        | hypothetical protein CNAG_01443                        | 1        | 0        | 0        | 1        |
| CNAG_01441        | chr5        | 300882       | 303499       | 2617        | null        | hypothetical protein CNAG_01441                        | 0        | 0        | 1        | 1        |
| CNAG_01440        | chr5        | 304337       | 306257       | 1920        | null        | hypothetical protein CNAG_01440                        | 0        | 1        | 1        | 2        |
| CNAG_01438        | chr5        | 308617       | 311733       | 3116        | null        | transcription factor                                   | 0        | 1        | 0        | 1        |

|            |      |        |        |      |       |                                                          |   |    |   |    |
|------------|------|--------|--------|------|-------|----------------------------------------------------------|---|----|---|----|
| CNAG_01437 | chr5 | 312056 | 313440 | 1384 | null  | ribosomal RNA assembly protein                           | 0 | 1  | 0 | 1  |
| CNAG_01436 | chr5 | 313552 | 314882 | 1330 | null  | serine/threonine-protein phosphatase 6 catalytic subunit | 0 | 0  | 1 | 1  |
| CNAG_07415 | chr5 | 317189 | 320945 | 3756 | null  | hypothetical protein CNAG_07415                          | 0 | 1  | 2 | 3  |
| CNAG_01432 | chr5 | 323603 | 325550 | 1947 | null  | ribosome assembly protein 4                              | 0 | 1  | 0 | 1  |
| CNAG_01430 | chr5 | 327665 | 329129 | 1464 | null  | hypothetical protein CNAG_01430                          | 1 | 0  | 0 | 1  |
| CNAG_01429 | chr5 | 329941 | 331320 | 1379 | null  | hypothetical protein CNAG_01429                          | 0 | 1  | 0 | 1  |
| CNAG_01428 | chr5 | 331619 | 332308 | 689  | null  | translation initiation factor 5A                         | 0 | 1  | 0 | 1  |
| CNAG_01425 | chr5 | 335648 | 336605 | 957  | null  | hypothetical protein CNAG_01425                          | 1 | 0  | 0 | 1  |
| CNAG_01423 | chr5 | 341846 | 344488 | 2642 | null  | hypothetical protein CNAG_01423                          | 0 | 1  | 1 | 2  |
| CNAG_01418 | chr5 | 361299 | 363414 | 2115 | null  | hypothetical protein CNAG_01418                          | 1 | 0  | 0 | 1  |
| CNAG_07418 | chr5 | 382626 | 383887 | 1261 | DCN1  | defective in Cullin neddylation protein 1                | 0 | 0  | 1 | 1  |
| CNAG_01408 | chr5 | 383991 | 389100 | 5109 | null  | PH and SEC7 domain-containing protein                    | 1 | 1  | 1 | 3  |
| CNAG_01404 | chr5 | 394173 | 396133 | 1960 | null  | hsp71-like protein                                       | 1 | 0  | 2 | 3  |
| CNAG_01403 | chr5 | 396216 | 397306 | 1090 | null  | eclair-PA                                                | 0 | 1  | 0 | 1  |
| CNAG_01402 | chr5 | 398223 | 399984 | 1761 | null  | actin binding protein                                    | 0 | 1  | 1 | 2  |
| CNAG_01401 | chr5 | 400560 | 401317 | 757  | null  | hypothetical protein CNAG_01401                          | 1 | 1  | 0 | 2  |
| CNAG_01400 | chr5 | 402242 | 403675 | 1433 | null  | 3-deoxy-7-phosphoheptulonate synthase                    | 0 | 1  | 0 | 1  |
| CNAG_01398 | chr5 | 405853 | 409462 | 3609 | null  | ATP-dependent RNA helicase DOB1                          | 0 | 1  | 0 | 1  |
| CNAG_07419 | chr5 | 414828 | 416247 | 1419 | null  | hypothetical protein CNAG_07419                          | 1 | 0  | 0 | 1  |
| CNAG_07420 | chr5 | 418428 | 419470 | 1042 | null  | hypothetical protein CNAG_07420                          | 0 | 10 | 1 | 11 |
| CNAG_01392 | chr5 | 419671 | 421105 | 1434 | null  | hypothetical protein CNAG_01392                          | 1 | 0  | 0 | 1  |
| CNAG_01391 | chr5 | 421166 | 422868 | 1702 | null  | cell division cycle protein 37                           | 1 | 1  | 2 | 4  |
| CNAG_01390 | chr5 | 423131 | 423827 | 696  | null  | adenine phosphoribosyltransferase                        | 0 | 0  | 4 | 4  |
| CNAG_01389 | chr5 | 424539 | 426692 | 2153 | null  | hypothetical protein CNAG_01389                          | 0 | 8  | 0 | 8  |
| CNAG_01388 | chr5 | 426854 | 429303 | 2449 | null  | hypothetical protein CNAG_01388                          | 3 | 0  | 0 | 3  |
| CNAG_01387 | chr5 | 429734 | 431165 | 1431 | null  | hypothetical protein CNAG_01387                          | 0 | 0  | 1 | 1  |
| CNAG_01385 | chr5 | 432334 | 435188 | 2854 | null  | hypothetical protein CNAG_01385                          | 1 | 0  | 0 | 1  |
| CNAG_01376 | chr5 | 455582 | 459840 | 4258 | null  | stress response protein NST1                             | 0 | 1  | 1 | 2  |
| CNAG_01375 | chr5 | 460132 | 462846 | 2714 | ABP1  | hypothetical protein CNAG_01375                          | 1 | 0  | 0 | 1  |
| CNAG_01373 | chr5 | 468400 | 469873 | 1473 | CDC10 | septin ring protein                                      | 0 | 1  | 0 | 1  |
| CNAG_01371 | chr5 | 473665 | 475148 | 1483 | CRG2  | hypothetical protein CNAG_01371                          | 0 | 2  | 0 | 2  |
| CNAG_01365 | chr5 | 488612 | 491066 | 2454 | null  | hypothetical protein CNAG_01365                          | 1 | 1  | 0 | 2  |
| CNAG_01363 | chr5 | 492372 | 493795 | 1423 | null  | XPA-binding protein 1                                    | 0 | 0  | 1 | 1  |
| CNAG_01362 | chr5 | 494228 | 497195 | 2967 | null  | cell cycle control protein cwf19                         | 0 | 1  | 0 | 1  |
| CNAG_01361 | chr5 | 497478 | 499748 | 2270 | null  | importin alpha subunit                                   | 0 | 1  | 1 | 2  |
| CNAG_01358 | chr5 | 507376 | 508453 | 1077 | null  | hypothetical protein CNAG_01358                          | 0 | 2  | 0 | 2  |
| CNAG_01357 | chr5 | 509051 | 510169 | 1118 | null  | hypothetical protein CNAG_01357                          | 1 | 0  | 0 | 1  |
| CNAG_01356 | chr5 | 510657 | 515079 | 4422 | null  | hypothetical protein CNAG_01356                          | 6 | 0  | 4 | 10 |
| CNAG_01353 | chr5 | 520201 | 522175 | 1974 | null  | hypothetical protein CNAG_01353                          | 1 | 0  | 0 | 1  |
| CNAG_07423 | chr5 | 522243 | 522980 | 737  | null  | hypothetical protein CNAG_07423                          | 0 | 2  | 0 | 2  |
| CNAG_01352 | chr5 | 523663 | 528046 | 4383 | null  | hypothetical protein CNAG_01352                          | 0 | 0  | 1 | 1  |
| CNAG_01350 | chr5 | 529929 | 531337 | 1408 | RMD5  | hypothetical protein CNAG_01350                          | 0 | 2  | 0 | 2  |
| CNAG_01349 | chr5 | 533989 | 535024 | 1035 | null  | hypothetical protein CNAG_01349                          | 0 | 1  | 0 | 1  |
| CNAG_01348 | chr5 | 535256 | 536040 | 784  | null  | cyanate hydratase                                        | 0 | 1  | 0 | 1  |
| CNAG_01344 | chr5 | 543469 | 545266 | 1797 | null  | hypothetical protein CNAG_01344                          | 0 | 0  | 1 | 1  |
| CNAG_01343 | chr5 | 545431 | 547793 | 2362 | null  | ATP-dependent Clp protease ATP-binding subunit ClpX      | 0 | 0  | 2 | 2  |
| CNAG_01337 | chr5 | 565291 | 567702 | 2411 | null  | WD-repeat protein                                        | 1 | 0  | 1 | 2  |

|            |      |        |        |      |        |                                                          |   |   |   |    |
|------------|------|--------|--------|------|--------|----------------------------------------------------------|---|---|---|----|
| CNAG_01336 | chr5 | 568067 | 569683 | 1616 | null   | hypothetical protein CNAG_01336                          | 0 | 1 | 0 | 1  |
| CNAG_01335 | chr5 | 570276 | 572200 | 1924 | null   | hypothetical protein CNAG_01335                          | 0 | 1 | 0 | 1  |
| CNAG_01334 | chr5 | 573160 | 577414 | 4254 | null   | hypothetical protein CNAG_01334                          | 6 | 1 | 1 | 8  |
| CNAG_01333 | chr5 | 578252 | 579985 | 1733 | null   | Haspin protein kinase                                    | 1 | 0 | 0 | 1  |
| CNAG_01332 | chr5 | 580238 | 581006 | 768  | null   | small subunit ribosomal protein S24e                     | 0 | 1 | 0 | 1  |
| CNAG_01330 | chr5 | 583261 | 586125 | 2864 | null   | hypothetical protein CNAG_01330                          | 1 | 0 | 0 | 1  |
| CNAG_07425 | chr5 | 591908 | 592967 | 1059 | null   | hypothetical protein CNAG_07425                          | 0 | 9 | 1 | 10 |
| CNAG_07980 | chr5 | 593519 | 593892 | 373  | null   | hypothetical protein CNAG_07980                          | 0 | 2 | 0 | 2  |
| CNAG_01323 | chr5 | 596965 | 597857 | 892  | null   | ubiquinol-cytochrome c reductase subunit 7               | 0 | 3 | 0 | 3  |
| CNAG_01322 | chr5 | 598090 | 600034 | 1944 | null   | hypothetical protein CNAG_01322                          | 1 | 0 | 0 | 1  |
| CNAG_01321 | chr5 | 600451 | 601242 | 791  | null   | acyl carrier protein                                     | 0 | 2 | 0 | 2  |
| CNAG_01315 | chr5 | 610846 | 613655 | 2809 | null   | protein transporter                                      | 1 | 0 | 0 | 1  |
| CNAG_01314 | chr5 | 613753 | 616586 | 2833 | null   | vacuolar protein                                         | 0 | 0 | 1 | 1  |
| CNAG_07426 | chr5 | 617681 | 618356 | 675  | null   | proteasome maturation protein                            | 0 | 1 | 0 | 1  |
| CNAG_01308 | chr5 | 624613 | 627833 | 3220 | null   | protein NRD1                                             | 2 | 0 | 0 | 2  |
| CNAG_01306 | chr5 | 631028 | 634989 | 3961 | null   | chromodomain-helicase-DNA-binding protein 3              | 1 | 0 | 0 | 1  |
| CNAG_01304 | chr5 | 638540 | 641028 | 2488 | null   | polynucleotide 5'-hydroxyl-kinase GRC3                   | 1 | 0 | 0 | 1  |
| CNAG_01300 | chr5 | 647105 | 647673 | 568  | null   | small subunit ribosomal protein S21e                     | 0 | 1 | 0 | 1  |
| CNAG_01299 | chr5 | 648147 | 650243 | 2096 | null   | hypothetical protein CNAG_01299                          | 1 | 0 | 0 | 1  |
| CNAG_01297 | chr5 | 657032 | 658675 | 1643 | null   | hypothetical protein CNAG_01297                          | 1 | 0 | 0 | 1  |
| CNAG_01292 | chr5 | 674899 | 678659 | 3760 | null   | pol II transcription elongation factor                   | 0 | 1 | 0 | 1  |
| CNAG_01288 | chr5 | 681113 | 682711 | 1598 | null   | solute carrier family 25, member 33/36                   | 0 | 1 | 0 | 1  |
| CNAG_01278 | chr5 | 709097 | 715033 | 5936 | APT2   | phospholipid-translocating ATPase                        | 0 | 2 | 0 | 2  |
| CNAG_01277 | chr5 | 716067 | 717677 | 1610 | null   | hypothetical protein CNAG_01277                          | 1 | 1 | 0 | 2  |
| CNAG_01273 | chr5 | 733079 | 734006 | 927  | null   | cellular nucleic acid-binding protein                    | 0 | 1 | 0 | 1  |
| CNAG_07429 | chr5 | 740815 | 742564 | 1749 | null   | asparagine-tRNA ligase                                   | 0 | 1 | 0 | 1  |
| CNAG_01263 | chr5 | 754551 | 757599 | 3048 | null   | vacuolar transporter chaperone 4                         | 1 | 0 | 1 | 2  |
| CNAG_01261 | chr5 | 759327 | 764045 | 4718 | null   | myosin I binding protein                                 | 1 | 0 | 0 | 1  |
| CNAG_01258 | chr5 | 779926 | 784257 | 4331 | null   | hypothetical protein CNAG_01258                          | 2 | 0 | 3 | 5  |
| CNAG_01256 | chr5 | 786968 | 790460 | 3492 | null   | hypothetical protein CNAG_01256                          | 1 | 0 | 1 | 2  |
| CNAG_01255 | chr5 | 791280 | 792869 | 1589 | null   | hypothetical protein CNAG_01255                          | 0 | 0 | 2 | 2  |
| CNAG_01254 | chr5 | 793192 | 794050 | 858  | null   | protein-tyrosine-phosphatase                             | 0 | 1 | 0 | 1  |
| CNAG_01252 | chr5 | 795508 | 796818 | 1310 | null   | thiosulfate/3-mercaptopyruvate sulfurtransferase         | 0 | 2 | 0 | 2  |
| CNAG_01251 | chr5 | 797289 | 803731 | 6442 | UFD4   | E3 ubiquitin-protein ligase TRIP12                       | 1 | 0 | 1 | 2  |
| CNAG_01250 | chr5 | 804163 | 807327 | 3164 | null   | tRNA ligase                                              | 1 | 0 | 0 | 1  |
| CNAG_01249 | chr5 | 807765 | 810530 | 2765 | null   | hypothetical protein CNAG_01249                          | 1 | 0 | 0 | 1  |
| CNAG_01248 | chr5 | 810891 | 814966 | 4075 | null   | vacuole morphology and inheritance protein 14            | 0 | 0 | 1 | 1  |
| CNAG_01247 | chr5 | 815203 | 816215 | 1012 | null   | hypothetical protein CNAG_01247                          | 1 | 0 | 0 | 1  |
| CNAG_01243 | chr5 | 823454 | 828261 | 4807 | SET101 | histone-lysine N-methyltransferase, H3 lysine-4 specific | 0 | 1 | 0 | 1  |
| CNAG_01241 | chr5 | 831923 | 833387 | 1464 | null   | enzyme regulator                                         | 0 | 2 | 0 | 2  |
| CNAG_01240 | chr5 | 834320 | 836419 | 2099 | null   | hypothetical protein CNAG_01240                          | 0 | 0 | 1 | 1  |
| CNAG_01239 | chr5 | 839089 | 840616 | 1527 | CDA3   | chitin deacetylase                                       | 1 | 1 | 0 | 2  |
| CNAG_01238 | chr5 | 844297 | 846002 | 1705 | null   | arginine biosynthesis ArgJ, mitochondrial                | 1 | 0 | 0 | 1  |
| CNAG_01233 | chr5 | 859047 | 863718 | 4671 | null   | hypothetical protein CNAG_01233                          | 1 | 0 | 0 | 1  |
| CNAG_07432 | chr5 | 879700 | 882293 | 2593 | null   | hypothetical protein CNAG_07432                          | 2 | 0 | 0 | 2  |
| CNAG_01223 | chr5 | 886059 | 887234 | 1175 | null   | hypothetical protein CNAG_01223                          | 0 | 1 | 0 | 1  |
| CNAG_07433 | chr5 | 891391 | 896593 | 5202 | null   | hypothetical protein CNAG_07433                          | 2 | 0 | 0 | 2  |

|            |      |         |         |      |          |                                                                   |   |   |   |   |
|------------|------|---------|---------|------|----------|-------------------------------------------------------------------|---|---|---|---|
| CNAG_01217 | chr5 | 896777  | 898875  | 2098 | null     | protein MPE1                                                      | 0 | 0 | 1 | 1 |
| CNAG_01208 | chr5 | 920020  | 927591  | 7571 | CCH1     | high-affinity cell membrane calcium channel protein               | 0 | 2 | 0 | 2 |
| CNAG_01207 | chr5 | 927963  | 930606  | 2643 | null     | hypothetical protein CNAG_01207                                   | 0 | 1 | 0 | 1 |
| CNAG_01201 | chr5 | 940369  | 941039  | 670  | null     | hypothetical protein CNAG_01201                                   | 0 | 1 | 0 | 1 |
| CNAG_01200 | chr5 | 941267  | 942415  | 1148 | null     | pre-mRNA-splicing factor 38A                                      | 1 | 0 | 0 | 1 |
| CNAG_01183 | chr5 | 982919  | 985239  | 2320 | LSB1     | hypothetical protein CNAG_01183                                   | 1 | 0 | 0 | 1 |
| CNAG_01173 | chr5 | 1009270 | 1012596 | 3326 | PAN1     | hypothetical protein CNAG_01173                                   | 0 | 0 | 1 | 1 |
| CNAG_01172 | chr5 | 1013000 | 1015304 | 2304 | PBX1     | hypothetical protein CNAG_01172                                   | 0 | 1 | 0 | 1 |
| CNAG_01171 | chr5 | 1015576 | 1015988 | 412  | null     | hypothetical protein CNAG_01171                                   | 1 | 3 | 0 | 4 |
| CNAG_01167 | chr5 | 1021546 | 1026054 | 4508 | URE2     | chromosome associated protein                                     | 0 | 0 | 1 | 1 |
| CNAG_01166 | chr5 | 1026273 | 1027256 | 983  | URE4     | urease accessory protein                                          | 0 | 2 | 0 | 2 |
| CNAG_01164 | chr5 | 1030035 | 1032571 | 2536 | null     | glutamine-fructose-6-phosphate transaminase (isomerizing)         | 1 | 1 | 0 | 2 |
| CNAG_01162 | chr5 | 1040137 | 1041507 | 1370 | null     | hypothetical protein CNAG_01162                                   | 1 | 0 | 0 | 1 |
| CNAG_01161 | chr5 | 1041906 | 1042837 | 931  | null     | hypothetical protein CNAG_01161                                   | 1 | 0 | 0 | 1 |
| CNAG_07439 | chr5 | 1043611 | 1047025 | 3414 | null     | U3 small nucleolar RNA-associated protein 21                      | 1 | 0 | 2 | 3 |
| CNAG_01159 | chr5 | 1047117 | 1049085 | 1968 | null     | pre-mRNA-splicing factor SLU7                                     | 1 | 1 | 0 | 2 |
| CNAG_01157 | chr5 | 1052515 | 1054242 | 1727 | null     | hypothetical protein CNAG_01157                                   | 0 | 1 | 0 | 1 |
| CNAG_01156 | chr5 | 1054904 | 1057196 | 2292 | CAP2     | hypothetical protein CNAG_01156                                   | 0 | 2 | 1 | 3 |
| CNAG_01155 | chr5 | 1057786 | 1060367 | 2581 | null     | glycerol kinase                                                   | 0 | 0 | 1 | 1 |
| CNAG_01154 | chr5 | 1061029 | 1061759 | 730  | null     | hypothetical protein CNAG_01154                                   | 0 | 8 | 0 | 8 |
| CNAG_01153 | chr5 | 1065111 | 1065763 | 652  | null     | small subunit ribosomal protein S13e                              | 0 | 5 | 0 | 5 |
| CNAG_01150 | chr5 | 1069146 | 1070825 | 1679 | null     | omega-6 fatty acid desaturase (delta-12 desaturase)               | 0 | 1 | 0 | 1 |
| CNAG_01149 | chr5 | 1071881 | 1077008 | 5127 | null     | hypothetical protein CNAG_01149                                   | 3 | 1 | 0 | 4 |
| CNAG_01147 | chr5 | 1079533 | 1080202 | 669  | null     | ARP2/3 complex 20 kDa subunit                                     | 0 | 1 | 0 | 1 |
| CNAG_01146 | chr5 | 1080317 | 1084402 | 4085 | null     | U3 small nucleolar RNA-associated protein 22                      | 2 | 1 | 1 | 4 |
| CNAG_01145 | chr5 | 1084604 | 1085963 | 1359 | null     | hypothetical protein CNAG_01145                                   | 1 | 0 | 1 | 2 |
| CNAG_01143 | chr5 | 1088741 | 1090031 | 1290 | null     | hypothetical protein CNAG_01143                                   | 0 | 1 | 0 | 1 |
| CNAG_01142 | chr5 | 1090182 | 1094237 | 4055 | null     | endoplasmic reticulum protein                                     | 0 | 1 | 0 | 1 |
| CNAG_01140 | chr5 | 1095868 | 1098467 | 2599 | null     | ATP-dependent RNA helicase DRS1                                   | 0 | 1 | 0 | 1 |
| CNAG_01136 | chr5 | 1108324 | 1109491 | 1167 | null     | hypothetical protein CNAG_01136                                   | 1 | 0 | 1 | 2 |
| CNAG_01134 | chr5 | 1112268 | 1116037 | 3769 | null     | hypothetical protein CNAG_01134                                   | 2 | 1 | 0 | 3 |
| CNAG_01127 | chr5 | 1129874 | 1132018 | 2144 | null     | hypothetical protein CNAG_01127                                   | 1 | 0 | 0 | 1 |
| CNAG_01126 | chr5 | 1132708 | 1139266 | 6558 | null     | guanine nucleotide exchange protein for ADP-robosylation factor   | 1 | 0 | 1 | 2 |
| CNAG_01121 | chr5 | 1150000 | 1150562 | 562  | null     | hypothetical protein CNAG_01121                                   | 0 | 1 | 0 | 1 |
| CNAG_01120 | chr5 | 1151774 | 1153458 | 1684 | null     | pyruvate dehydrogenase complex dihydrolipoamide acetyltransferase | 0 | 1 | 0 | 1 |
| CNAG_01119 | chr5 | 1154216 | 1156436 | 2220 | null     | POT family proton-dependent oligopeptide transporter              | 1 | 0 | 0 | 1 |
| CNAG_01118 | chr5 | 1158958 | 1160875 | 1917 | null     | AAT family amino acid transporter                                 | 1 | 0 | 0 | 1 |
| CNAG_01117 | chr5 | 1163379 | 1166733 | 3354 | EF3      | elongation factor 3                                               | 0 | 2 | 0 | 2 |
| CNAG_01115 | chr5 | 1169400 | 1179250 | 9850 | null     | hypothetical protein CNAG_01115                                   | 1 | 0 | 0 | 1 |
| CNAG_01114 | chr5 | 1179708 | 1180342 | 634  | null     | hypothetical protein CNAG_01114                                   | 0 | 0 | 1 | 1 |
| CNAG_01111 | chr5 | 1183338 | 1184415 | 1077 | null     | translation initiation factor 3 subunit K                         | 0 | 1 | 0 | 1 |
| CNAG_01108 | chr5 | 1187761 | 1190690 | 2929 | DAL2,3,3 | allantoicase                                                      | 0 | 0 | 1 | 1 |
| CNAG_01106 | chr5 | 1193990 | 1197049 | 3059 | VPH1     | V-type H -transporting ATPase subunit I                           | 1 | 0 | 0 | 1 |
| CNAG_01098 | chr5 | 1218866 | 1221238 | 2372 | null     | pre-rRNA-processing protein IPI1                                  | 0 | 2 | 0 | 2 |
| CNAG_01090 | chr5 | 1234829 | 1235977 | 1148 | null     | alpha/beta hydrolase fold protein                                 | 1 | 0 | 0 | 1 |
| CNAG_01087 | chr5 | 1239999 | 1242199 | 2200 | null     | hypothetical protein CNAG_01087                                   | 0 | 0 | 1 | 1 |
| CNAG_01084 | chr5 | 1246223 | 1247208 | 985  | UBC4     | ubiquitin-conjugating enzyme 4                                    | 0 | 1 | 0 | 1 |

|            |      |         |         |      |      |                                                         |   |   |   |   |
|------------|------|---------|---------|------|------|---------------------------------------------------------|---|---|---|---|
| CNAG_01081 | chr5 | 1255581 | 1256850 | 1269 | null | hypothetical protein CNAG_01081                         | 0 | 1 | 0 | 1 |
| CNAG_01072 | chr5 | 1277358 | 1278890 | 1532 | null | amidase                                                 | 0 | 1 | 0 | 1 |
| CNAG_01070 | chr5 | 1281913 | 1283146 | 1233 | null | class II aldolase/adducin family protein                | 0 | 2 | 0 | 2 |
| CNAG_01069 | chr5 | 1284269 | 1287339 | 3070 | null | hypothetical protein CNAG_01069                         | 0 | 1 | 4 | 5 |
| CNAG_07441 | chr5 | 1287550 | 1288271 | 721  | null | hypothetical protein CNAG_07441                         | 2 | 2 | 1 | 5 |
| CNAG_07443 | chr5 | 1290948 | 1292419 | 1471 | null | hypothetical protein CNAG_07443                         | 0 | 2 | 1 | 3 |
| CNAG_01062 | chr5 | 1304684 | 1308392 | 3708 | null | CAMK/CAMKL/PASK protein kinase                          | 1 | 1 | 0 | 2 |
| CNAG_01061 | chr5 | 1309270 | 1312427 | 3157 | null | serine/threonine protein kinase                         | 1 | 1 | 1 | 3 |
| CNAG_01060 | chr5 | 1312651 | 1314259 | 1608 | null | hypothetical protein CNAG_01060                         | 0 | 1 | 0 | 1 |
| CNAG_01059 | chr5 | 1314602 | 1316331 | 1729 | null | vacuolar membrane protein                               | 0 | 2 | 1 | 3 |
| CNAG_01058 | chr5 | 1316412 | 1317526 | 1114 | null | nitric oxide synthase-interacting protein               | 0 | 1 | 0 | 1 |
| CNAG_07444 | chr5 | 1321787 | 1323925 | 2138 | null | hypothetical protein CNAG_07444                         | 1 | 1 | 0 | 2 |
| CNAG_01051 | chr5 | 1338299 | 1342848 | 4549 | null | dynactin 1                                              | 2 | 0 | 0 | 2 |
| CNAG_01041 | chr5 | 1364777 | 1365593 | 816  | null | hypothetical protein CNAG_01041                         | 0 | 1 | 0 | 1 |
| CNAG_01040 | chr5 | 1366829 | 1368770 | 1941 | null | carboxypeptidase D                                      | 1 | 0 | 1 | 2 |
| CNAG_01039 | chr5 | 1370513 | 1375666 | 5153 | null | superkiller protein 3                                   | 2 | 0 | 0 | 2 |
| CNAG_01035 | chr5 | 1382896 | 1384129 | 1233 | null | 20S proteasome subunit alpha 4                          | 0 | 0 | 1 | 1 |
| CNAG_01032 | chr5 | 1387662 | 1392052 | 4390 | null | hypothetical protein CNAG_01032                         | 1 | 1 | 0 | 2 |
| CNAG_01031 | chr5 | 1393095 | 1394418 | 1323 | null | hypothetical protein CNAG_01031                         | 1 | 0 | 1 | 2 |
| CNAG_01029 | chr5 | 1396496 | 1398111 | 1615 | null | impact family protein                                   | 0 | 1 | 0 | 1 |
| CNAG_01026 | chr5 | 1401928 | 1404670 | 2742 | null | gamma-glutamyltransferase                               | 0 | 0 | 1 | 1 |
| CNAG_01025 | chr5 | 1405036 | 1406480 | 1444 | null | hypothetical protein CNAG_01025                         | 0 | 1 | 0 | 1 |
| CNAG_01023 | chr5 | 1407975 | 1410303 | 2328 | null | cohesin complex subunit SCC1                            | 0 | 0 | 1 | 1 |
| CNAG_01018 | chr5 | 1418354 | 1420208 | 1854 | null | histone-lysine N-methyltransferase Su(var)3-9           | 0 | 0 | 1 | 1 |
| CNAG_01016 | chr5 | 1427076 | 1431641 | 4565 | null | vacuolar membrane protein                               | 1 | 0 | 1 | 2 |
| CNAG_01014 | chr5 | 1434211 | 1435638 | 1427 | null | hypothetical protein CNAG_01014                         | 0 | 1 | 0 | 1 |
| CNAG_01008 | chr5 | 1445912 | 1447555 | 1643 | null | hypothetical protein CNAG_01008                         | 0 | 0 | 1 | 1 |
| CNAG_01004 | chr5 | 1454546 | 1457659 | 3113 | null | hypothetical protein CNAG_01004                         | 1 | 0 | 0 | 1 |
| CNAG_01003 | chr5 | 1458060 | 1460510 | 2450 | NCP1 | NADPH-ferrihemoprotein reductase                        | 0 | 0 | 1 | 1 |
| CNAG_01001 | chr5 | 1464356 | 1466496 | 2140 | null | hypothetical protein CNAG_01001                         | 0 | 1 | 0 | 1 |
| CNAG_00998 | chr5 | 1473831 | 1478759 | 4928 | null | hypothetical protein CNAG_00998                         | 1 | 4 | 0 | 5 |
| CNAG_00992 | chr5 | 1488718 | 1490613 | 1895 | null | homocitrate synthase, mitochondrial                     | 0 | 0 | 1 | 1 |
| CNAG_00989 | chr5 | 1493795 | 1495134 | 1339 | UCH2 | ubiquitin carboxyl-terminal hydrolase L5                | 0 | 1 | 0 | 1 |
| CNAG_00988 | chr5 | 1495524 | 1498482 | 2958 | null | importin subunit beta-1                                 | 0 | 1 | 0 | 1 |
| CNAG_00987 | chr5 | 1501726 | 1502669 | 943  | null | prefoldin subunit                                       | 0 | 1 | 0 | 1 |
| CNAG_00986 | chr5 | 1502917 | 1504479 | 1562 | UBA4 | adenylyltransferase and sulfurtransferase               | 0 | 1 | 0 | 1 |
| CNAG_00982 | chr5 | 1511379 | 1512466 | 1087 | null | hypothetical protein CNAG_00982                         | 1 | 0 | 0 | 1 |
| CNAG_00979 | chr5 | 1517917 | 1518715 | 798  | CTR4 | solute carrier family 31 (copper transporter), member 1 | 0 | 2 | 0 | 2 |
| CNAG_00978 | chr5 | 1519054 | 1520492 | 1438 | null | NADH dehydrogenase (ubiquinone) 1 alpha subcomplex 9    | 0 | 2 | 0 | 2 |
| CNAG_00977 | chr5 | 1520873 | 1522784 | 1911 | null | VHS domain-containing protein                           | 0 | 0 | 1 | 1 |
| CNAG_00974 | chr5 | 1528319 | 1529289 | 970  | null | beta-lactamase                                          | 1 | 0 | 0 | 1 |
| CNAG_00971 | chr5 | 1532590 | 1535021 | 2431 | null | vacuolar fusion protein MON1                            | 0 | 1 | 0 | 1 |
| CNAG_00968 | chr5 | 1540456 | 1541665 | 1209 | null | hypothetical protein CNAG_00968                         | 0 | 0 | 1 | 1 |
| CNAG_07445 | chr5 | 1547048 | 1549801 | 2753 | null | transketolase                                           | 0 | 1 | 0 | 1 |
| CNAG_07446 | chr5 | 1552259 | 1552624 | 365  | null | mitochondrial protein                                   | 1 | 0 | 0 | 1 |
| CNAG_00961 | chr5 | 1553461 | 1554897 | 1436 | null | hypothetical protein CNAG_00961                         | 0 | 1 | 0 | 1 |
| CNAG_07447 | chr5 | 1561568 | 1562663 | 1095 | null | hypothetical protein CNAG_07447                         | 0 | 1 | 0 | 1 |

|            |      |         |         |      |        |                                                                                           |   |   |   |   |
|------------|------|---------|---------|------|--------|-------------------------------------------------------------------------------------------|---|---|---|---|
| CNAG_00941 | chr5 | 1580221 | 1580739 | 518  | null   | hypothetical protein CNAG_00941                                                           | 0 | 1 | 0 | 1 |
| CNAG_00940 | chr5 | 1581510 | 1585029 | 3519 | RRP44  | exosome complex exonuclease DIS3/RRP44                                                    | 0 | 2 | 0 | 2 |
| CNAG_00938 | chr5 | 1587848 | 1588748 | 900  | null   | hypothetical protein CNAG_00938                                                           | 0 | 1 | 0 | 1 |
| CNAG_00936 | chr5 | 1591428 | 1593816 | 2388 | null   | lipid particle protein                                                                    | 1 | 2 | 1 | 4 |
| CNAG_00927 | chr5 | 1610777 | 1612244 | 1467 | null   | guanyl nucleotide binding protein                                                         | 0 | 1 | 0 | 1 |
| CNAG_00917 | chr5 | 1634277 | 1636601 | 2324 | null   | alkylbase DNA N-glycosylase                                                               | 1 | 0 | 0 | 1 |
| CNAG_00915 | chr5 | 1639675 | 1640862 | 1187 | null   | hypothetical protein CNAG_00915                                                           | 1 | 0 | 0 | 1 |
| CNAG_00914 | chr5 | 1642229 | 1644317 | 2088 | KRE6   | glucosidase                                                                               | 0 | 1 | 0 | 1 |
| CNAG_00908 | chr5 | 1660563 | 1661540 | 977  | null   | hypothetical protein CNAG_00908                                                           | 0 | 0 | 2 | 2 |
| CNAG_00903 | chr5 | 1676877 | 1677636 | 759  | null   | hypothetical protein CNAG_00903                                                           | 0 | 1 | 0 | 1 |
| CNAG_00895 | chr5 | 1701697 | 1703029 | 1332 | ZIP1   | solute carrier family 39 (zinc transporter), member 1/2/3                                 | 0 | 1 | 0 | 1 |
| CNAG_00894 | chr5 | 1705377 | 1705847 | 470  | null   | hypothetical protein CNAG_00894                                                           | 0 | 1 | 0 | 1 |
| CNAG_00890 | chr5 | 1714010 | 1716778 | 2768 | null   | hypothetical protein CNAG_00890                                                           | 0 | 1 | 0 | 1 |
| CNAG_07453 | chr5 | 1736636 | 1738641 | 2005 | null   | hypothetical protein CNAG_07453                                                           | 0 | 1 | 0 | 1 |
| CNAG_00872 | chr5 | 1761351 | 1765145 | 3794 | null   | ATP-dependent DNA helicase                                                                | 2 | 1 | 0 | 3 |
| CNAG_00871 | chr5 | 1767017 | 1768854 | 1837 | null   | hypothetical protein CNAG_00871                                                           | 0 | 1 | 0 | 1 |
| CNAG_00870 | chr5 | 1771379 | 1772152 | 773  | null   | hypothetical protein CNAG_00870                                                           | 0 | 1 | 0 | 1 |
| CNAG_00869 | chr5 | 1775551 | 1780923 | 5372 | PDR5   | ATP-binding cassette transporter                                                          | 0 | 1 | 1 | 2 |
| CNAG_00865 | chr5 | 1790357 | 1791427 | 1070 | CAS92  | maltose O-acetyltransferase                                                               | 0 | 1 | 0 | 1 |
| CNAG_00864 | chr5 | 1793803 | 1795826 | 2023 | ITR2   | MFS transporter, SP family, solute carrier family 2 (myo-inositol transporter), member 13 | 0 | 1 | 0 | 1 |
| CNAG_02557 | chr6 | 3409    | 5731    | 2322 | null   | fungal specific transcription factor                                                      | 0 | 2 | 0 | 2 |
| CNAG_02554 | chr6 | 11769   | 13915   | 2146 | null   | sugar transporter                                                                         | 1 | 0 | 1 | 2 |
| CNAG_02549 | chr6 | 22142   | 24277   | 2135 | null   | hypothetical protein CNAG_02549                                                           | 0 | 1 | 0 | 1 |
| CNAG_02544 | chr6 | 39014   | 39503   | 489  | null   | DNA repair protein Swi5/Sae3                                                              | 0 | 1 | 0 | 1 |
| CNAG_02542 | chr6 | 41711   | 42957   | 1246 | null   | fructosamine kinase                                                                       | 1 | 0 | 0 | 1 |
| CNAG_02540 | chr6 | 48961   | 50984   | 2023 | null   | hypothetical protein CNAG_02540                                                           | 0 | 2 | 0 | 2 |
| CNAG_02538 | chr6 | 55387   | 56566   | 1179 | null   | hypothetical protein CNAG_02538                                                           | 0 | 1 | 0 | 1 |
| CNAG_02536 | chr6 | 58257   | 60018   | 1761 | TAF6   | transcription initiation factor TFIID subunit 6                                           | 2 | 0 | 1 | 3 |
| CNAG_02535 | chr6 | 60162   | 61167   | 1005 | null   | hypothetical protein CNAG_02535                                                           | 0 | 3 | 1 | 4 |
| CNAG_02534 | chr6 | 61282   | 62497   | 1215 | null   | tRNA 2'-phosphotransferase                                                                | 0 | 0 | 1 | 1 |
| CNAG_02533 | chr6 | 62964   | 64578   | 1614 | null   | hypothetical protein CNAG_02533                                                           | 1 | 2 | 1 | 4 |
| CNAG_02531 | chr6 | 68671   | 70815   | 2144 | CPK1   | CMGC/MAPK protein kinase                                                                  | 0 | 1 | 0 | 1 |
| CNAG_02530 | chr6 | 71519   | 74200   | 2681 | null   | hypothetical protein CNAG_02530                                                           | 1 | 0 | 0 | 1 |
| CNAG_02528 | chr6 | 75281   | 78208   | 2927 | null   | hypothetical protein CNAG_02528                                                           | 0 | 0 | 2 | 2 |
| CNAG_02527 | chr6 | 78964   | 81426   | 2462 | null   | multidrug transporter                                                                     | 0 | 1 | 0 | 1 |
| CNAG_02526 | chr6 | 85040   | 85943   | 903  | null   | hypothetical protein CNAG_02526                                                           | 0 | 4 | 1 | 5 |
| CNAG_02525 | chr6 | 87188   | 90889   | 3701 | null   | hypothetical protein CNAG_02525                                                           | 1 | 2 | 1 | 4 |
| CNAG_02523 | chr6 | 95780   | 100320  | 4540 | null   | hypothetical protein CNAG_02523                                                           | 1 | 1 | 1 | 3 |
| CNAG_02522 | chr6 | 101444  | 102809  | 1365 | MRS3/4 | solute carrier family 25 (mitochondrial iron transporter), member 28/37                   | 0 | 0 | 1 | 1 |
| CNAG_02520 | chr6 | 104604  | 106188  | 1584 | null   | DNA-directed RNA polymerase III subunit RPC4                                              | 0 | 1 | 0 | 1 |
| CNAG_02516 | chr6 | 113130  | 115353  | 2223 | null   | hypothetical protein CNAG_02516                                                           | 1 | 0 | 0 | 1 |
| CNAG_02512 | chr6 | 121394  | 125423  | 4029 | null   | DNA repair protein RAD16                                                                  | 0 | 0 | 1 | 1 |
| CNAG_02510 | chr6 | 131056  | 132984  | 1928 | null   | hypothetical protein CNAG_02510                                                           | 1 | 1 | 0 | 2 |
| CNAG_02509 | chr6 | 133790  | 135331  | 1541 | null   | hypothetical protein CNAG_02509                                                           | 2 | 0 | 1 | 3 |
| CNAG_02508 | chr6 | 135751  | 136694  | 943  | null   | hypothetical protein CNAG_02508                                                           | 0 | 2 | 0 | 2 |
| CNAG_02507 | chr6 | 136977  | 138342  | 1365 | null   | translation initiation factor 3 subunit H                                                 | 0 | 3 | 1 | 4 |
| CNAG_02506 | chr6 | 138743  | 139701  | 958  | null   | 3,4-dihydroxy-2-butanone-4-phosphate synthase                                             | 1 | 0 | 0 | 1 |

|            |      |        |        |      |        |                                                       |   |   |   |   |
|------------|------|--------|--------|------|--------|-------------------------------------------------------|---|---|---|---|
| CNAG_02505 | chr6 | 140236 | 142235 | 1999 | null   | cardiolipin-specific phospholipase                    | 1 | 1 | 0 | 2 |
| CNAG_02504 | chr6 | 142631 | 143872 | 1241 | null   | hypothetical protein CNAG_02504                       | 1 | 0 | 1 | 2 |
| CNAG_02498 | chr6 | 153058 | 157357 | 4299 | null   | hypothetical protein CNAG_02498                       | 1 | 1 | 0 | 2 |
| CNAG_02497 | chr6 | 157989 | 159923 | 1934 | null   | thaumatin family protein                              | 1 | 1 | 0 | 2 |
| CNAG_02489 | chr6 | 178139 | 179391 | 1252 | null   | alcohol dehydrogenase, propanol-preferring            | 0 | 1 | 0 | 1 |
| CNAG_02488 | chr6 | 183631 | 186787 | 3156 | null   | methionyl-tRNA formyltransferase                      | 1 | 0 | 5 | 6 |
| CNAG_02487 | chr6 | 187201 | 188372 | 1171 | null   | 3-hydroxy acyl-CoA dehydratase                        | 0 | 2 | 0 | 2 |
| CNAG_02486 | chr6 | 188521 | 189770 | 1249 | null   | translation initiation factor 2 subunit 2             | 0 | 2 | 0 | 2 |
| CNAG_02485 | chr6 | 190100 | 191393 | 1293 | null   | ATP synthase F1, gamma subunit                        | 0 | 1 | 0 | 1 |
| CNAG_07625 | chr6 | 193040 | 196216 | 3176 | null   | plasma membrane protein                               | 0 | 1 | 1 | 2 |
| CNAG_02483 | chr6 | 196925 | 198402 | 1477 | null   | hypothetical protein CNAG_02483                       | 3 | 0 | 1 | 4 |
| CNAG_02480 | chr6 | 203319 | 205522 | 2203 | null   | cell cycle checkpoint control protein RAD9A           | 0 | 0 | 1 | 1 |
| CNAG_02479 | chr6 | 206610 | 209018 | 2408 | null   | monosaccharide transporter                            | 0 | 1 | 0 | 1 |
| CNAG_02476 | chr6 | 213646 | 217692 | 4046 | YRM101 | hypothetical protein CNAG_02476                       | 1 | 0 | 1 | 2 |
| CNAG_02475 | chr6 | 218037 | 220112 | 2075 | null   | flavin-containing monooxygenase                       | 0 | 1 | 0 | 1 |
| CNAG_02472 | chr6 | 226624 | 228567 | 1943 | null   | endosomal P24A protein                                | 0 | 0 | 1 | 1 |
| CNAG_02470 | chr6 | 230999 | 232844 | 1845 | null   | phosphoric monoester hydrolase                        | 0 | 1 | 0 | 1 |
| CNAG_02468 | chr6 | 237920 | 241147 | 3227 | null   | AP-3 complex subunit delta-1                          | 0 | 0 | 1 | 1 |
| CNAG_02467 | chr6 | 241356 | 245284 | 3928 | null   | DNA repair/transcription protein MET18/MMS19          | 1 | 1 | 0 | 2 |
| CNAG_02466 | chr6 | 245462 | 248249 | 2787 | null   | hypothetical protein CNAG_02466                       | 0 | 1 | 0 | 1 |
| CNAG_02465 | chr6 | 249286 | 251415 | 2129 | null   | allantoate permease                                   | 1 | 0 | 0 | 1 |
| CNAG_02464 | chr6 | 252409 | 257109 | 4700 | null   | 5-oxoprolinase (ATP-hydrolysing)                      | 0 | 0 | 2 | 2 |
| CNAG_02463 | chr6 | 257762 | 259283 | 1521 | null   | hypothetical protein CNAG_02463                       | 0 | 2 | 0 | 2 |
| CNAG_07627 | chr6 | 260608 | 266063 | 5455 | null   | hypothetical protein CNAG_07627                       | 1 | 0 | 1 | 2 |
| CNAG_02455 | chr6 | 284161 | 286304 | 2143 | null   | choline transporter                                   | 0 | 2 | 0 | 2 |
| CNAG_02454 | chr6 | 287045 | 289269 | 2224 | null   | H/ACA ribonucleoprotein complex non-core subunit NAF1 | 0 | 0 | 1 | 1 |
| CNAG_02452 | chr6 | 296080 | 297253 | 1173 | null   | hypothetical protein CNAG_02452                       | 1 | 0 | 0 | 1 |
| CNAG_02449 | chr6 | 302003 | 304647 | 2644 | null   | long-chain fatty acid CoA ligase                      | 2 | 0 | 0 | 2 |
| CNAG_02446 | chr6 | 307664 | 308554 | 890  | null   | response regulator receiver protein                   | 1 | 0 | 0 | 1 |
| CNAG_02443 | chr6 | 312979 | 313476 | 497  | null   | NADH dehydrogenase                                    | 0 | 1 | 0 | 1 |
| CNAG_02439 | chr6 | 320827 | 321804 | 977  | null   | hypothetical protein CNAG_02439                       | 0 | 1 | 0 | 1 |
| CNAG_02437 | chr6 | 326214 | 331017 | 4803 | null   | rRNA biogenesis protein RRP5                          | 2 | 0 | 0 | 2 |
| CNAG_02433 | chr6 | 336764 | 337917 | 1153 | null   | thiol oxidase                                         | 1 | 0 | 0 | 1 |
| CNAG_02432 | chr6 | 338758 | 341884 | 3126 | null   | hypothetical protein CNAG_02432                       | 1 | 0 | 0 | 1 |
| CNAG_02430 | chr6 | 344225 | 349995 | 5770 | null   | ABC transporter ABCC.6                                | 0 | 2 | 0 | 2 |
| CNAG_02428 | chr6 | 351815 | 354599 | 2784 | null   | GC-rich sequence DNA-binding factor                   | 1 | 0 | 0 | 1 |
| CNAG_02424 | chr6 | 361099 | 363921 | 2822 | null   | hypothetical protein CNAG_02424                       | 0 | 0 | 1 | 1 |
| CNAG_02423 | chr6 | 364246 | 365785 | 1539 | null   | hypothetical protein CNAG_02423                       | 1 | 0 | 0 | 1 |
| CNAG_02419 | chr6 | 371109 | 373752 | 2643 | null   | hypothetical protein CNAG_02419                       | 1 | 0 | 1 | 2 |
| CNAG_02418 | chr6 | 373890 | 375993 | 2103 | null   | asparagine-tRNA ligase                                | 1 | 1 | 1 | 3 |
| CNAG_02415 | chr6 | 380495 | 382236 | 1741 | null   | annexin XIV                                           | 0 | 1 | 0 | 1 |
| CNAG_02409 | chr6 | 396438 | 397913 | 1475 | LIV5   | hypothetical protein CNAG_02409                       | 1 | 2 | 0 | 3 |
| CNAG_02407 | chr6 | 400029 | 404250 | 4221 | null   | phospholipase D                                       | 0 | 0 | 1 | 1 |
| CNAG_02406 | chr6 | 404527 | 406934 | 2407 | null   | cell division control protein 45                      | 1 | 0 | 1 | 2 |
| CNAG_02401 | chr6 | 418974 | 421895 | 2921 | null   | G patch domain-containing protein 1                   | 1 | 1 | 0 | 2 |
| CNAG_02396 | chr6 | 435003 | 436506 | 1503 | null   | hypothetical protein CNAG_02396                       | 1 | 0 | 0 | 1 |
| CNAG_02395 | chr6 | 437194 | 439715 | 2521 | null   | ubiquitin carboxyl-terminal hydrolase 9/13            | 0 | 1 | 0 | 1 |



|            |      |        |        |      |      |                                                                                      |   |   |   |   |
|------------|------|--------|--------|------|------|--------------------------------------------------------------------------------------|---|---|---|---|
| CNAG_02392 | chr6 | 449250 | 450070 | 820  | null | hypothetical protein CNAG_02392                                                      | 0 | 1 | 0 | 1 |
| CNAG_02388 | chr6 | 459756 | 460896 | 1140 | null | hypothetical protein CNAG_02388                                                      | 0 | 1 | 0 | 1 |
| CNAG_02383 | chr6 | 468156 | 469590 | 1434 | null | trimethylguanosine synthase                                                          | 0 | 1 | 1 | 2 |
| CNAG_02381 | chr6 | 470982 | 472579 | 1597 | null | hypothetical protein CNAG_02381                                                      | 1 | 0 | 0 | 1 |
| CNAG_02378 | chr6 | 476459 | 477292 | 833  | null | H/ACA ribonucleoprotein complex subunit 2                                            | 0 | 1 | 0 | 1 |
| CNAG_02376 | chr6 | 479717 | 480995 | 1278 | null | hypothetical protein CNAG_02376                                                      | 0 | 1 | 0 | 1 |
| CNAG_02375 | chr6 | 481191 | 484674 | 3483 | null | polyphosphoinositide phosphatase                                                     | 0 | 2 | 2 | 4 |
| CNAG_02374 | chr6 | 485289 | 488190 | 2901 | null | hypothetical protein CNAG_02374                                                      | 0 | 0 | 2 | 2 |
| CNAG_02373 | chr6 | 488230 | 490771 | 2541 | null | ATP-binding protein                                                                  | 2 | 3 | 4 | 9 |
| CNAG_02371 | chr6 | 492915 | 494179 | 1264 | null | coiled-coil domain-containing protein 130                                            | 1 | 1 | 0 | 2 |
| CNAG_02368 | chr6 | 501233 | 503505 | 2272 | null | hypothetical protein CNAG_02368                                                      | 0 | 3 | 0 | 3 |
| CNAG_02366 | chr6 | 505479 | 507426 | 1947 | null | 4-aminobutyrate aminotransferase                                                     | 1 | 0 | 0 | 1 |
| CNAG_02364 | chr6 | 510958 | 512315 | 1357 | null | hypothetical protein CNAG_02364                                                      | 1 | 0 | 0 | 1 |
| CNAG_02363 | chr6 | 512630 | 514606 | 1976 | null | SCR1 protein                                                                         | 0 | 1 | 0 | 1 |
| CNAG_02360 | chr6 | 521383 | 522304 | 921  | null | hypothetical protein CNAG_02360                                                      | 0 | 1 | 0 | 1 |
| CNAG_02359 | chr6 | 522865 | 523486 | 621  | null | small subunit ribosomal protein S25e                                                 | 0 | 3 | 0 | 3 |
| CNAG_02358 | chr6 | 523602 | 525037 | 1435 | null | MRP family ATP-binding protein                                                       | 0 | 0 | 1 | 1 |
| CNAG_02356 | chr6 | 527902 | 528877 | 975  | null | phosphatidylinositol glycan, class F                                                 | 0 | 0 | 1 | 1 |
| CNAG_02355 | chr6 | 529165 | 531035 | 1870 | null | solute carrier family 35 (UDP-xylose/UDP-N-acetylglucosamine transporter), member B4 | 1 | 0 | 1 | 2 |
| CNAG_07634 | chr6 | 537032 | 541797 | 4765 | null | hypothetical protein CNAG_07634                                                      | 1 | 2 | 1 | 4 |
| CNAG_02350 | chr6 | 546702 | 547637 | 935  | null | hypothetical protein CNAG_02350                                                      | 1 | 0 | 0 | 1 |
| CNAG_02347 | chr6 | 553316 | 553930 | 614  | null | hypothetical protein CNAG_02347                                                      | 0 | 1 | 0 | 1 |
| CNAG_02343 | chr6 | 559422 | 561981 | 2559 | null | hypothetical protein CNAG_02343                                                      | 0 | 1 | 0 | 1 |
| CNAG_02342 | chr6 | 562464 | 563854 | 1390 | null | hypothetical protein CNAG_02342                                                      | 0 | 1 | 0 | 1 |
| CNAG_02340 | chr6 | 569067 | 569772 | 705  | null | hypothetical protein CNAG_02340                                                      | 1 | 1 | 0 | 2 |
| CNAG_02339 | chr6 | 570155 | 571309 | 1154 | null | hypothetical protein CNAG_02339                                                      | 0 | 0 | 1 | 1 |
| CNAG_02335 | chr6 | 579635 | 581798 | 2163 | null | hypothetical protein CNAG_02335                                                      | 0 | 1 | 0 | 1 |
| CNAG_02332 | chr6 | 588707 | 590100 | 1393 | null | hypothetical protein CNAG_02332                                                      | 1 | 0 | 0 | 1 |
| CNAG_02328 | chr6 | 597696 | 600656 | 2960 | null | pre-rRNA-processing protein TSR1                                                     | 1 | 0 | 0 | 1 |
| CNAG_02311 | chr6 | 640609 | 642749 | 2140 | null | hypothetical protein CNAG_02311                                                      | 1 | 0 | 0 | 1 |
| CNAG_02290 | chr6 | 687540 | 689245 | 1705 | null | parafibromin                                                                         | 0 | 1 | 0 | 1 |
| CNAG_02285 | chr6 | 700547 | 701486 | 939  | null | nucleoside diphosphate kinase                                                        | 0 | 1 | 0 | 1 |
| CNAG_07641 | chr6 | 724990 | 727183 | 2193 | null | monosaccharide transporter                                                           | 1 | 0 | 1 | 2 |
| CNAG_07642 | chr6 | 730825 | 732501 | 1676 | null | hypothetical protein CNAG_07642                                                      | 0 | 2 | 0 | 2 |
| CNAG_02269 | chr6 | 735423 | 737087 | 1664 | null | autophagy-like protein 18 Atg18                                                      | 0 | 2 | 0 | 2 |
| CNAG_02268 | chr6 | 737252 | 738786 | 1534 | null | nuclear membrane protein                                                             | 0 | 1 | 1 | 2 |
| CNAG_02267 | chr6 | 738936 | 740522 | 1586 | null | cell cycle arrest protein BUB3                                                       | 1 | 0 | 0 | 1 |
| CNAG_07163 | chr6 | 742938 | 744113 | 1175 | null | preprotein translocase subunit YidC                                                  | 0 | 2 | 0 | 2 |
| CNAG_02260 | chr6 | 763961 | 765531 | 1570 | CRG1 | protein FAM50                                                                        | 0 | 0 | 1 | 1 |
| CNAG_02255 | chr6 | 775676 | 776970 | 1294 | null | BNR/Asp-box repeat family protein                                                    | 1 | 0 | 0 | 1 |
| CNAG_02240 | chr6 | 821972 | 825033 | 3061 | null | cytoplasmic protein                                                                  | 0 | 2 | 0 | 2 |
| CNAG_02237 | chr6 | 828703 | 832439 | 3736 | SLA2 | cytoskeleton assembly control protein                                                | 0 | 2 | 0 | 2 |
| CNAG_02233 | chr6 | 836740 | 844476 | 7736 | null | serine/threonine-protein kinase ATR                                                  | 0 | 0 | 1 | 1 |
| CNAG_02231 | chr6 | 846395 | 847564 | 1169 | null | cytosolic Fe-S cluster assembly factor NBP35                                         | 1 | 0 | 0 | 1 |
| CNAG_02228 | chr6 | 857468 | 858291 | 823  | null | hypothetical protein CNAG_02228                                                      | 0 | 0 | 1 | 1 |
| CNAG_02220 | chr6 | 876475 | 879689 | 3214 | null | hypothetical protein CNAG_02220                                                      | 0 | 1 | 0 | 1 |
| CNAG_02216 | chr6 | 893411 | 899411 | 6000 | null | hypothetical protein CNAG_02216                                                      | 1 | 0 | 0 | 1 |

|                   |             |                |                |             |             |                                                                  |          |           |          |           |
|-------------------|-------------|----------------|----------------|-------------|-------------|------------------------------------------------------------------|----------|-----------|----------|-----------|
| CNAG_02213        | chr6        | 902038         | 903949         | 1911        | null        | epsin                                                            | 1        | 0         | 0        | 1         |
| CNAG_02210        | chr6        | 909059         | 911304         | 2245        | null        | ribonuclease Z                                                   | 0        | 1         | 0        | 1         |
| CNAG_02206        | chr6        | 921006         | 921355         | 349         | null        | hypothetical protein CNAG_02206                                  | 0        | 1         | 0        | 1         |
| CNAG_02204        | chr6        | 923322         | 924739         | 1417        | null        | endonuclease G, mitochondrial                                    | 1        | 1         | 0        | 2         |
| CNAG_02202        | chr6        | 928799         | 929659         | 860         | null        | adenylylsulfate kinase                                           | 0        | 2         | 0        | 2         |
| CNAG_02196        | chr6        | 937189         | 938733         | 1544        | CDC11       | septin                                                           | 1        | 0         | 0        | 1         |
| CNAG_02194        | chr6        | 942579         | 945166         | 2587        | null        | AGC/NDR protein kinase                                           | 0        | 0         | 1        | 1         |
| CNAG_02188        | chr6        | 955708         | 956577         | 869         | null        | hypothetical protein CNAG_02188                                  | 0        | 1         | 0        | 1         |
| CNAG_02175        | chr6        | 991751         | 997012         | 5261        | null        | 5\'-3\' exoribonuclease 1                                        | 0        | 1         | 1        | 2         |
| CNAG_02174        | chr6        | 997358         | 999617         | 2259        | null        | signal recognition particle protein SRP54                        | 1        | 0         | 0        | 1         |
| CNAG_02172        | chr6        | 1001107        | 1007049        | 5942        | null        | ubiquitin-protein ligase                                         | 0        | 1         | 0        | 1         |
| CNAG_02169        | chr6        | 1013219        | 1014715        | 1496        | null        | hypothetical protein CNAG_02169                                  | 0        | 0         | 1        | 1         |
| CNAG_02167        | chr6        | 1021153        | 1023643        | 2490        | null        | vacuolar protein sorting-associated protein 27                   | 0        | 1         | 0        | 1         |
| CNAG_02165        | chr6        | 1031181        | 1034260        | 3079        | null        | cytoplasmic protein                                              | 2        | 0         | 0        | 2         |
| CNAG_02164        | chr6        | 1034846        | 1038644        | 3798        | null        | hypothetical protein CNAG_02164                                  | 2        | 0         | 1        | 3         |
| CNAG_02161        | chr6        | 1041966        | 1046131        | 4165        | null        | cortical actin cytoskeleton protein asp1                         | 0        | 1         | 0        | 1         |
| CNAG_02159        | chr6        | 1049803        | 1050555        | 752         | null        | hypothetical protein CNAG_02159                                  | 1        | 0         | 0        | 1         |
| CNAG_02157        | chr6        | 1056521        | 1058534        | 2013        | null        | hypothetical protein CNAG_02157                                  | 0        | 1         | 0        | 1         |
| CNAG_02152        | chr6        | 1070021        | 1071730        | 1709        | null        | hypothetical protein CNAG_02152                                  | 1        | 0         | 0        | 1         |
| CNAG_02151        | chr6        | 1071894        | 1075109        | 3215        | null        | amidohydrolase                                                   | 1        | 0         | 0        | 1         |
| CNAG_02150        | chr6        | 1075494        | 1077201        | 1707        | null        | mRNA methyltransferase                                           | 0        | 3         | 0        | 3         |
| CNAG_02148        | chr6        | 1078083        | 1078972        | 889         | null        | ubiquitin-conjugating enzyme E2 35                               | 0        | 1         | 0        | 1         |
| CNAG_02144        | chr6        | 1084033        | 1084871        | 838         | null        | large subunit ribosomal protein L1-A                             | 0        | 1         | 0        | 1         |
| CNAG_02139        | chr6        | 1093211        | 1095369        | 2158        | null        | oxysterol-binding protein                                        | 0        | 1         | 0        | 1         |
| CNAG_02138        | chr6        | 1096639        | 1101563        | 4924        | null        | DNA replication ATP-dependent helicase Dna2                      | 0        | 1         | 2        | 3         |
| CNAG_02130        | chr6        | 1117336        | 1119601        | 2265        | NSR1        | RNA-binding protein 39                                           | 0        | 1         | 0        | 1         |
| CNAG_02123        | chr6        | 1134460        | 1135883        | 1423        | null        | methionyl-tRNA formyltransferase                                 | 1        | 0         | 0        | 1         |
| CNAG_02122        | chr6        | 1136239        | 1137759        | 1520        | null        | cytoplasmic tRNA 2-thiolation protein 1                          | 1        | 0         | 0        | 1         |
| CNAG_02121        | chr6        | 1138097        | 1140589        | 2492        | null        | hypothetical protein CNAG_02121                                  | 0        | 0         | 1        | 1         |
| CNAG_02119        | chr6        | 1142653        | 1144170        | 1517        | null        | hypothetical protein CNAG_02119                                  | 0        | 0         | 1        | 1         |
| CNAG_02115        | chr6        | 1150136        | 1151082        | 946         | NHP6B02     | nonhistone protein 6                                             | 0        | 0         | 1        | 1         |
| CNAG_02114        | chr6        | 1152058        | 1154094        | 2036        | null        | hypothetical protein CNAG_02114                                  | 0        | 0         | 1        | 1         |
| CNAG_02111        | chr6        | 1157050        | 1159241        | 2191        | null        | protein Clp1                                                     | 0        | 1         | 0        | 1         |
| CNAG_02108        | chr6        | 1167621        | 1170002        | 2381        | null        | GTPase activating protein                                        | 0        | 1         | 0        | 1         |
| CNAG_02106        | chr6        | 1173017        | 1173905        | 888         | null        | mitochondrial intermembrane space import and assembly protein 40 | 1        | 0         | 0        | 1         |
| CNAG_02103        | chr6        | 1177308        | 1183318        | 6010        | null        | hypothetical protein CNAG_02103                                  | 1        | 1         | 0        | 2         |
| CNAG_02102        | chr6        | 1184299        | 1186432        | 2133        | null        | hypothetical protein CNAG_02102                                  | 1        | 0         | 0        | 1         |
| CNAG_02101        | chr6        | 1186689        | 1187357        | 668         | null        | hypothetical protein CNAG_02101                                  | 0        | 1         | 0        | 1         |
| CNAG_02097        | chr6        | 1205333        | 1206538        | 1205        | null        | hypothetical protein CNAG_02097                                  | 0        | 2         | 0        | 2         |
| CNAG_02096        | chr6        | 1206727        | 1208093        | 1366        | null        | peroxin-16                                                       | 0        | 3         | 0        | 3         |
| CNAG_02095        | chr6        | 1210820        | 1212566        | 1746        | null        | cyclin                                                           | 0        | 3         | 0        | 3         |
| CNAG_02094        | chr6        | 1213609        | 1214850        | 1241        | null        | arp2/3 complex 34 kda subunit                                    | 0        | 1         | 0        | 1         |
| CNAG_02091        | chr6        | 1221770        | 1223473        | 1703        | null        | nucleosome assembly protein 1-like 1                             | 0        | 1         | 0        | 1         |
| CNAG_02090        | chr6        | 1223904        | 1225574        | 1670        | GPA3        | guanine nucleotide-binding protein G(o) subunit alpha            | 0        | 1         | 0        | 1         |
| <b>CNAG_02089</b> | <b>chr6</b> | <b>1227443</b> | <b>1229691</b> | <b>2248</b> | <b>null</b> | <b>hypothetical protein CNAG_02089</b>                           | <b>0</b> | <b>27</b> | <b>0</b> | <b>27</b> |
| CNAG_02088        | chr6        | 1230428        | 1231913        | 1485        | null        | hypothetical protein CNAG_02088                                  | 0        | 4         | 1        | 5         |
| <b>CNAG_02087</b> | <b>chr6</b> | <b>1232584</b> | <b>1234447</b> | <b>1863</b> | <b>null</b> | <b>acyl-CoA-dependent ceramide synthase</b>                      | <b>2</b> | <b>12</b> | <b>0</b> | <b>14</b> |

|                   |             |                |                |             |             |                                                               |          |          |          |           |
|-------------------|-------------|----------------|----------------|-------------|-------------|---------------------------------------------------------------|----------|----------|----------|-----------|
| CNAG_02086        | chr6        | 1235336        | 1237294        | 1958        | null        | acyl-CoA-dependent ceramide synthase                          | 0        | 3        | 1        | 4         |
| CNAG_02085        | chr6        | 1237703        | 1239261        | 1558        | HST302      | hypothetical protein CNAG_02085                               | 1        | 1        | 1        | 3         |
| CNAG_02084        | chr6        | 1240228        | 1241779        | 1551        | ERG20       | farnesyl diphosphate synthase                                 | 0        | 2        | 0        | 2         |
| CNAG_02083        | chr6        | 1242140        | 1244614        | 2474        | SIT2        | siderochrome-iron transporter                                 | 2        | 1        | 1        | 4         |
| CNAG_02079        | chr6        | 1254558        | 1258929        | 4371        | null        | cytoplasmic protein                                           | 0        | 1        | 0        | 1         |
| CNAG_02078        | chr6        | 1259240        | 1260650        | 1410        | null        | hydrolase                                                     | 0        | 2        | 0        | 2         |
| CNAG_02071        | chr6        | 1273623        | 1276344        | 2721        | BN14        | hypothetical protein CNAG_02071                               | 1        | 0        | 0        | 1         |
| CNAG_02069        | chr6        | 1281767        | 1282557        | 790         | null        | hypothetical protein CNAG_02069                               | 0        | 1        | 0        | 1         |
| CNAG_02068        | chr6        | 1282955        | 1284487        | 1532        | null        | stromal membrane-associated protein                           | 0        | 1        | 0        | 1         |
| CNAG_02064        | chr6        | 1290929        | 1297060        | 6131        | null        | TATA-box-binding protein-associated factor                    | 1        | 0        | 1        | 2         |
| CNAG_02062        | chr6        | 1302181        | 1305630        | 3449        | null        | glycoside hydrolase family 2                                  | 0        | 1        | 1        | 2         |
| CNAG_02059        | chr6        | 1310589        | 1311749        | 1160        | null        | CCR4-NOT complex subunit CAF16                                | 0        | 1        | 0        | 1         |
| CNAG_02056        | chr6        | 1316930        | 1318339        | 1409        | null        | hypothetical protein CNAG_02056                               | 1        | 0        | 1        | 2         |
| CNAG_02053        | chr6        | 1322542        | 1324133        | 1591        | null        | hypothetical protein CNAG_02053                               | 1        | 0        | 0        | 1         |
| CNAG_02052        | chr6        | 1324193        | 1325679        | 1486        | null        | dimeric dihydrodiol dehydrogenase                             | 1        | 1        | 0        | 2         |
| CNAG_02051        | chr6        | 1326116        | 1329840        | 3724        | null        | kinesin family member 20/23                                   | 0        | 1        | 0        | 1         |
| CNAG_02050        | chr6        | 1330219        | 1331731        | 1512        | QDR1        | hypothetical protein CNAG_02050                               | 0        | 1        | 0        | 1         |
| CNAG_02049        | chr6        | 1332040        | 1334052        | 2012        | PUT1        | proline dehydrogenase                                         | 0        | 3        | 0        | 3         |
| CNAG_02046        | chr6        | 1340537        | 1343214        | 2677        | null        | poly(A)-binding protein binding protein                       | 1        | 0        | 0        | 1         |
| CNAG_02045        | chr6        | 1343679        | 1346270        | 2591        | null        | acetoacetate-CoA ligase                                       | 1        | 0        | 0        | 1         |
| CNAG_02043        | chr6        | 1348248        | 1349048        | 800         | null        | hypothetical protein CNAG_02043                               | 0        | 2        | 0        | 2         |
| CNAG_02041        | chr6        | 1355915        | 1357097        | 1182        | null        | hypothetical protein CNAG_02041                               | 0        | 1        | 0        | 1         |
| CNAG_02040        | chr6        | 1357885        | 1359066        | 1181        | null        | hypothetical protein CNAG_02040                               | 0        | 1        | 0        | 1         |
| CNAG_02038        | chr6        | 1361741        | 1364045        | 2304        | null        | hypothetical protein CNAG_02038                               | 1        | 0        | 1        | 2         |
| CNAG_02036        | chr6        | 1365774        | 1367915        | 2141        | CAS4        | hypothetical protein CNAG_02036                               | 0        | 0        | 2        | 2         |
| CNAG_02035        | chr6        | 1368392        | 1369347        | 955         | null        | triose-phosphate isomerase                                    | 0        | 2        | 0        | 2         |
| CNAG_07650        | chr6        | 1371941        | 1372556        | 615         | null        | hypothetical protein CNAG_07650                               | 2        | 0        | 0        | 2         |
| CNAG_02032        | chr6        | 1372865        | 1378196        | 5331        | null        | nuclear export factor                                         | 2        | 0        | 0        | 2         |
| CNAG_02031        | chr6        | 1379008        | 1380210        | 1202        | null        | hypothetical protein CNAG_02031                               | 1        | 0        | 2        | 3         |
| CNAG_02030        | chr6        | 1381644        | 1383944        | 2300        | null        | glyoxal oxidase                                               | 0        | 2        | 1        | 3         |
| CNAG_02029        | chr6        | 1386476        | 1388205        | 1729        | WSP1        | wiskott-Aldrich syndrome protein                              | 0        | 1        | 0        | 1         |
| CNAG_02028        | chr6        | 1388990        | 1391323        | 2333        | null        | CMGC/SRPK protein kinase                                      | 0        | 1        | 0        | 1         |
| CNAG_02027        | chr6        | 1393560        | 1397159        | 3599        | null        | hypothetical protein CNAG_02027                               | 0        | 5        | 0        | 5         |
| CNAG_02026        | chr6        | 1398846        | 1401885        | 3039        | null        | hypothetical protein CNAG_02026                               | 1        | 2        | 0        | 3         |
| CNAG_02025        | chr6        | 1402084        | 1404075        | 1991        | null        | DNA-directed RNA polymerase III subunit RPC3                  | 0        | 5        | 2        | 7         |
| CNAG_02024        | chr6        | 1404293        | 1408098        | 3805        | null        | hypothetical protein CNAG_02024                               | 4        | 0        | 1        | 5         |
| CNAG_02023        | chr6        | 1408263        | 1409712        | 1449        | null        | hypothetical protein CNAG_02023                               | 2        | 2        | 0        | 4         |
| CNAG_02022        | chr6        | 1410446        | 1411879        | 1433        | null        | DNA-directed RNA polymerase II subunit RPB3                   | 0        | 3        | 0        | 3         |
| CNAG_02021        | chr6        | 1412176        | 1413126        | 950         | null        | N-terminal acetyltransferase A complex catalytic subunit Ard1 | 0        | 2        | 1        | 3         |
| CNAG_02020        | chr6        | 1413549        | 1415166        | 1617        | null        | SWR1-complex protein 4                                        | 0        | 0        | 3        | 3         |
| <b>CNAG_07651</b> | <b>chr6</b> | <b>1416143</b> | <b>1418201</b> | <b>2058</b> | <b>null</b> | <b>DEAD-box ATP-dependent RNA helicase 26</b>                 | <b>3</b> | <b>5</b> | <b>5</b> | <b>13</b> |
| CNAG_06524        | chr7        | 7512           | 10013          | 2501        | FRE3        | hypothetical protein CNAG_06524                               | 1        | 0        | 0        | 1         |
| CNAG_06525        | chr7        | 10451          | 11473          | 1022        | null        | nuclear protein                                               | 0        | 3        | 0        | 3         |
| CNAG_06526        | chr7        | 12826          | 13962          | 1136        | null        | hypothetical protein CNAG_06526                               | 1        | 0        | 0        | 1         |
| CNAG_06530        | chr7        | 22749          | 24234          | 1485        | null        | hypothetical protein CNAG_06530                               | 0        | 1        | 0        | 1         |
| CNAG_06532        | chr7        | 29820          | 33104          | 3284        | null        | hypothetical protein CNAG_06532                               | 2        | 2        | 0        | 4         |
| CNAG_06533        | chr7        | 33308          | 37622          | 4314        | null        | ATP-dependent permease                                        | 0        | 1        | 0        | 1         |

|            |      |        |        |      |        |                                                |   |   |   |   |
|------------|------|--------|--------|------|--------|------------------------------------------------|---|---|---|---|
| CNAG_06534 | chr7 | 38815  | 42994  | 4179 | HMG1   | hydroxymethylglutaryl-CoA reductase (NADPH)    | 0 | 0 | 1 | 1 |
| CNAG_06535 | chr7 | 43601  | 44850  | 1249 | null   | ribosome biogenesis protein UTP30              | 0 | 1 | 0 | 1 |
| CNAG_06537 | chr7 | 47693  | 49459  | 1766 | null   | monocarboxylic acid transporter                | 1 | 0 | 0 | 1 |
| CNAG_06543 | chr7 | 66917  | 68608  | 1691 | null   | ethanolaminephosphotransferase                 | 1 | 0 | 0 | 1 |
| CNAG_06544 | chr7 | 69231  | 69773  | 542  | null   | non-histone chromosomal protein 6              | 0 | 1 | 0 | 1 |
| CNAG_06546 | chr7 | 73794  | 75011  | 1217 | null   | hypothetical protein CNAG_06546                | 1 | 0 | 0 | 1 |
| CNAG_06550 | chr7 | 84042  | 90807  | 6765 | null   | nucleoporin family protein                     | 1 | 0 | 1 | 2 |
| CNAG_06551 | chr7 | 91772  | 94746  | 2974 | null   | carnitine O-acetyltransferase                  | 0 | 1 | 0 | 1 |
| CNAG_06564 | chr7 | 125971 | 132518 | 6547 | null   | clathrin-coated vesicle protein                | 1 | 0 | 0 | 1 |
| CNAG_07659 | chr7 | 151685 | 153133 | 1448 | null   | hypothetical protein CNAG_07659                | 1 | 0 | 0 | 1 |
| CNAG_06576 | chr7 | 170370 | 171300 | 930  | CAR1   | allergen                                       | 0 | 2 | 0 | 2 |
| CNAG_07661 | chr7 | 184497 | 187767 | 3270 | null   | hypothetical protein CNAG_07661                | 1 | 0 | 0 | 1 |
| CNAG_06583 | chr7 | 188287 | 189633 | 1346 | null   | hypothetical protein CNAG_06583                | 0 | 0 | 1 | 1 |
| CNAG_06584 | chr7 | 190339 | 192644 | 2305 | null   | hypothetical protein CNAG_06584                | 2 | 0 | 0 | 2 |
| CNAG_06585 | chr7 | 193893 | 200713 | 6820 | null   | pre-mRNA-splicing helicase BRR2                | 0 | 0 | 1 | 1 |
| CNAG_06589 | chr7 | 206413 | 206947 | 534  | null   | endoribonuclease L-PSP                         | 0 | 1 | 0 | 1 |
| CNAG_06591 | chr7 | 211114 | 216010 | 4896 | SET302 | hypothetical protein CNAG_06591                | 1 | 1 | 0 | 2 |
| CNAG_06592 | chr7 | 217139 | 218312 | 1173 | UBC7   | ubiquitin-conjugating enzyme E2 G1             | 0 | 0 | 1 | 1 |
| CNAG_06593 | chr7 | 219909 | 223098 | 3189 | null   | rhamnogalacturonan lyase                       | 0 | 2 | 0 | 2 |
| CNAG_06598 | chr7 | 232088 | 232418 | 330  | null   | hypothetical protein CNAG_06598                | 0 | 0 | 1 | 1 |
| CNAG_06601 | chr7 | 238389 | 241026 | 2637 | null   | amidohydrolase                                 | 1 | 0 | 0 | 1 |
| CNAG_06602 | chr7 | 242630 | 243388 | 758  | null   | cysteine-type peptidase                        | 1 | 0 | 0 | 1 |
| CNAG_06603 | chr7 | 244426 | 248394 | 3968 | null   | di- and tripeptidase                           | 0 | 2 | 0 | 2 |
| CNAG_06604 | chr7 | 248628 | 250652 | 2024 | null   | hypothetical protein CNAG_06604                | 1 | 0 | 1 | 2 |
| CNAG_06611 | chr7 | 273169 | 277266 | 4097 | null   | DNA-directed RNA polymerase I subunit RPA2     | 0 | 0 | 1 | 1 |
| CNAG_06612 | chr7 | 278844 | 279733 | 889  | null   | hypothetical protein CNAG_06612                | 0 | 1 | 0 | 1 |
| CNAG_06616 | chr7 | 287155 | 289139 | 1984 | null   | hypothetical protein CNAG_06616                | 0 | 0 | 1 | 1 |
| CNAG_06625 | chr7 | 310622 | 312218 | 1596 | null   | UBX domain-containing protein 1                | 0 | 2 | 0 | 2 |
| CNAG_06632 | chr7 | 329292 | 331664 | 2372 | null   | Atypical/ABC1 protein kinase                   | 0 | 0 | 1 | 1 |
| CNAG_06634 | chr7 | 335697 | 337784 | 2087 | null   | DNA polymerase epsilon subunit B               | 1 | 0 | 0 | 1 |
| CNAG_06635 | chr7 | 338106 | 340607 | 2501 | null   | CCR4-NOT transcription complex subunit 3       | 0 | 1 | 0 | 1 |
| CNAG_06637 | chr7 | 344742 | 346981 | 2239 | null   | ubiquitin carboxyl-terminal hydrolase 22/27/51 | 0 | 2 | 0 | 2 |
| CNAG_06639 | chr7 | 351428 | 356649 | 5221 | null   | E3 ubiquitin-protein ligase MARCH6             | 1 | 0 | 1 | 2 |
| CNAG_06642 | chr7 | 361513 | 369953 | 8440 | TOR1   | Atypical/PIKK/FRAP protein kinase              | 1 | 0 | 0 | 1 |
| CNAG_06644 | chr7 | 372447 | 374319 | 1872 | ERG5   | C-22 sterol desaturase                         | 0 | 1 | 0 | 1 |
| CNAG_06648 | chr7 | 382103 | 384126 | 2023 | RTF1   | RNA polymerase-associated protein RTF1         | 0 | 1 | 0 | 1 |
| CNAG_06651 | chr7 | 388229 | 389873 | 1644 | null   | amidohydrolase                                 | 0 | 1 | 0 | 1 |
| CNAG_06652 | chr7 | 390974 | 392935 | 1961 | null   | allantoate permease                            | 0 | 1 | 0 | 1 |
| CNAG_06655 | chr7 | 395779 | 397255 | 1476 | GPI8   | phosphatidylinositol glycan, class K           | 0 | 1 | 0 | 1 |
| CNAG_06662 | chr7 | 413455 | 414792 | 1337 | null   | hypothetical protein CNAG_06662                | 0 | 1 | 0 | 1 |
| CNAG_06664 | chr7 | 416148 | 418388 | 2240 | null   | sorting nexin MVP1                             | 1 | 1 | 0 | 2 |
| CNAG_06665 | chr7 | 418607 | 420533 | 1926 | null   | hypothetical protein CNAG_06665                | 1 | 0 | 0 | 1 |
| CNAG_06667 | chr7 | 425706 | 427378 | 1672 | null   | hypothetical protein CNAG_06667                | 0 | 2 | 0 | 2 |
| CNAG_06671 | chr7 | 432454 | 435814 | 3360 | null   | TKL protein kinase                             | 1 | 0 | 0 | 1 |
| CNAG_06678 | chr7 | 456484 | 458965 | 2481 | CSR1   | enzyme activator                               | 0 | 0 | 1 | 1 |
| CNAG_07176 | chr7 | 473916 | 474788 | 872  | null   | hypothetical protein CNAG_07176                | 0 | 0 | 1 | 1 |
| CNAG_06683 | chr7 | 475833 | 480998 | 5165 | null   | hypothetical protein CNAG_06683                | 2 | 0 | 0 | 2 |

|            |      |        |        |      |       |                                                   |   |   |   |   |
|------------|------|--------|--------|------|-------|---------------------------------------------------|---|---|---|---|
| CNAG_06684 | chr7 | 481151 | 482722 | 1571 | null  | pre-rRNA-processing protein IPI3                  | 1 | 0 | 0 | 1 |
| CNAG_06686 | chr7 | 486000 | 486904 | 904  | null  | hypothetical protein CNAG_06686                   | 0 | 1 | 1 | 2 |
| CNAG_06687 | chr7 | 488136 | 493510 | 5374 | null  | hypothetical protein CNAG_06687                   | 1 | 1 | 0 | 2 |
| CNAG_06691 | chr7 | 501719 | 505146 | 3427 | null  | tuftelin-interacting protein 11                   | 0 | 0 | 1 | 1 |
| CNAG_06692 | chr7 | 505434 | 506231 | 797  | null  | glucosamine-phosphate N-acetyltransferase         | 0 | 1 | 0 | 1 |
| CNAG_06695 | chr7 | 509046 | 510157 | 1111 | null  | hypothetical protein CNAG_06695                   | 0 | 1 | 0 | 1 |
| CNAG_07990 | chr7 | 517424 | 518220 | 796  | null  | hypothetical protein CNAG_07990                   | 1 | 1 | 0 | 2 |
| CNAG_06698 | chr7 | 519709 | 520860 | 1151 | null  | phosphatase                                       | 0 | 2 | 1 | 3 |
| CNAG_06699 | chr7 | 523887 | 525564 | 1677 | GPD   | glyceraldehyde-3-phosphate dehydrogenase          | 0 | 3 | 0 | 3 |
| CNAG_05670 | chr7 | 568362 | 568806 | 444  | null  | hypothetical protein CNAG_05670                   | 0 | 2 | 0 | 2 |
| CNAG_05672 | chr7 | 573257 | 574244 | 987  | null  | nucleolar protein                                 | 0 | 4 | 0 | 4 |
| CNAG_05673 | chr7 | 574855 | 577881 | 3026 | null  | GPI inositol-deacylase                            | 1 | 0 | 0 | 1 |
| CNAG_05674 | chr7 | 579182 | 580982 | 1800 | null  | solute carrier family 35, member E1               | 0 | 1 | 0 | 1 |
| CNAG_05675 | chr7 | 581177 | 582945 | 1768 | null  | trimethyllysine dioxygenase                       | 0 | 1 | 0 | 1 |
| CNAG_07666 | chr7 | 584587 | 586098 | 1511 | null  | hypothetical protein CNAG_07666                   | 1 | 0 | 0 | 1 |
| CNAG_05678 | chr7 | 593667 | 594882 | 1215 | null  | membrane protein                                  | 0 | 0 | 1 | 1 |
| CNAG_07667 | chr7 | 597354 | 599921 | 2567 | null  | HAL protein kinase                                | 1 | 0 | 0 | 1 |
| CNAG_05682 | chr7 | 603193 | 603860 | 667  | null  | hypothetical protein CNAG_05682                   | 0 | 2 | 0 | 2 |
| CNAG_05686 | chr7 | 615474 | 615934 | 460  | null  | hypothetical protein CNAG_05686                   | 0 | 1 | 0 | 1 |
| CNAG_05687 | chr7 | 616260 | 619670 | 3410 | null  | hypothetical protein CNAG_05687                   | 2 | 0 | 0 | 2 |
| CNAG_05691 | chr7 | 624573 | 624951 | 378  | null  | hypothetical protein CNAG_05691                   | 0 | 1 | 0 | 1 |
| CNAG_05692 | chr7 | 625711 | 627817 | 2106 | null  | sphingosine-1-phosphate phosphatase               | 0 | 0 | 1 | 1 |
| CNAG_05695 | chr7 | 633846 | 638113 | 4267 | null  | glucosamine 6-phosphate N-acetyltransferase       | 0 | 0 | 1 | 1 |
| CNAG_05696 | chr7 | 639246 | 640119 | 873  | null  | ubiquitin-conjugating enzyme E2-16 kDa            | 0 | 3 | 0 | 3 |
| CNAG_05700 | chr7 | 650268 | 651613 | 1345 | null  | endoplasmic reticulum protein                     | 1 | 0 | 0 | 1 |
| CNAG_05703 | chr7 | 655253 | 660108 | 4855 | LRG1  | rho GTPase activator                              | 0 | 0 | 1 | 1 |
| CNAG_05704 | chr7 | 661042 | 661869 | 827  | null  | ESCRT-II complex subunit VPS22                    | 0 | 0 | 1 | 1 |
| CNAG_05708 | chr7 | 667396 | 670285 | 2889 | UBP14 | ubiquitin carboxyl-terminal hydrolase 5/13        | 0 | 1 | 1 | 2 |
| CNAG_05712 | chr7 | 672933 | 673705 | 772  | RIB4  | 6,7-dimethyl-8-ribityllumazine synthase           | 0 | 2 | 1 | 3 |
| CNAG_05713 | chr7 | 674276 | 678720 | 4444 | null  | elongator complex protein 1                       | 3 | 0 | 2 | 5 |
| CNAG_05714 | chr7 | 679034 | 680689 | 1655 | null  | hypothetical protein CNAG_05714                   | 1 | 0 | 0 | 1 |
| CNAG_05716 | chr7 | 683711 | 684485 | 774  | null  | hypothetical protein CNAG_05716                   | 0 | 1 | 0 | 1 |
| CNAG_05717 | chr7 | 685388 | 686566 | 1178 | null  | hypothetical protein CNAG_05717                   | 0 | 2 | 0 | 2 |
| CNAG_05720 | chr7 | 691705 | 692726 | 1021 | null  | GTPase inhibitor                                  | 0 | 0 | 1 | 1 |
| CNAG_05724 | chr7 | 704603 | 706771 | 2168 | null  | hypothetical protein CNAG_05724                   | 0 | 1 | 0 | 1 |
| CNAG_05725 | chr7 | 707080 | 708651 | 1571 | null  | ketol-acid reductoisomerase, mitochondrial        | 0 | 1 | 0 | 1 |
| CNAG_05729 | chr7 | 715960 | 716644 | 684  | null  | hypothetical protein CNAG_05729                   | 1 | 0 | 0 | 1 |
| CNAG_05731 | chr7 | 718898 | 721243 | 2345 | null  | glyoxal oxidase                                   | 0 | 2 | 0 | 2 |
| CNAG_05733 | chr7 | 722655 | 724807 | 2152 | null  | cytoplasmic protein                               | 0 | 1 | 0 | 1 |
| CNAG_05735 | chr7 | 729495 | 730022 | 527  | null  | hypothetical protein CNAG_05735                   | 0 | 0 | 1 | 1 |
| CNAG_05736 | chr7 | 731399 | 732374 | 975  | null  | hypothetical protein CNAG_05736                   | 0 | 1 | 0 | 1 |
| CNAG_05737 | chr7 | 733248 | 736105 | 2857 | null  | oligopeptide transporter 8                        | 0 | 0 | 1 | 1 |
| CNAG_05738 | chr7 | 736757 | 738024 | 1267 | null  | hypothetical protein CNAG_05738                   | 0 | 1 | 0 | 1 |
| CNAG_05742 | chr7 | 743828 | 745870 | 2042 | STP1  | hypothetical protein CNAG_05742                   | 0 | 0 | 1 | 1 |
| CNAG_05745 | chr7 | 749042 | 752653 | 3611 | null  | cytoplasmic protein                               | 1 | 0 | 0 | 1 |
| CNAG_05746 | chr7 | 752895 | 755614 | 2719 | null  | Swi5-dependent recombination DNA repair protein 1 | 0 | 1 | 0 | 1 |
| CNAG_05755 | chr7 | 781857 | 783274 | 1417 | null  | protein MAK16                                     | 0 | 1 | 0 | 1 |

|            |      |         |         |      |      |                                                                         |   |    |   |    |
|------------|------|---------|---------|------|------|-------------------------------------------------------------------------|---|----|---|----|
| CNAG_05756 | chr7 | 783523  | 784442  | 919  | null | mitochondrial protein                                                   | 0 | 1  | 0 | 1  |
| CNAG_05761 | chr7 | 802205  | 802836  | 631  | null | cyclin-dependent kinase regulatory subunit CKS1                         | 0 | 1  | 0 | 1  |
| CNAG_05762 | chr7 | 803485  | 804044  | 559  | null | large subunit acidic ribosomal protein P2                               | 0 | 1  | 0 | 1  |
| CNAG_05766 | chr7 | 809669  | 812043  | 2374 | SPR1 | endoglucanase C                                                         | 0 | 1  | 0 | 1  |
| CNAG_05767 | chr7 | 812478  | 815007  | 2529 | null | hypothetical protein CNAG_05767                                         | 1 | 0  | 0 | 1  |
| CNAG_05770 | chr7 | 821806  | 823134  | 1328 | null | proteasome component PRE2                                               | 1 | 0  | 0 | 1  |
| CNAG_05771 | chr7 | 823466  | 833154  | 9688 | null | serine/threonine-protein kinase TEL1                                    | 1 | 0  | 0 | 1  |
| CNAG_05772 | chr7 | 833604  | 836038  | 2434 | null | hypothetical protein CNAG_05772                                         | 1 | 1  | 1 | 3  |
| CNAG_05775 | chr7 | 841832  | 844293  | 2461 | null | phosphatidylinositol glycan, class S                                    | 1 | 0  | 0 | 1  |
| CNAG_05778 | chr7 | 847554  | 849551  | 1997 | null | WSC domain-containing protein                                           | 0 | 0  | 1 | 1  |
| CNAG_07674 | chr7 | 850946  | 852264  | 1318 | null | hypothetical protein CNAG_07674                                         | 1 | 0  | 0 | 1  |
| CNAG_05785 | chr7 | 859860  | 862848  | 2988 | STB4 | hypothetical protein CNAG_05785                                         | 1 | 1  | 0 | 2  |
| CNAG_05787 | chr7 | 871732  | 875308  | 3576 | null | symplekin                                                               | 0 | 0  | 1 | 1  |
| CNAG_05789 | chr7 | 876449  | 877729  | 1280 | null | hypothetical protein CNAG_05789                                         | 0 | 0  | 1 | 1  |
| CNAG_05791 | chr7 | 882360  | 885656  | 3296 | ZDS3 | hypothetical protein CNAG_05791                                         | 1 | 0  | 0 | 1  |
| CNAG_05793 | chr7 | 888123  | 889470  | 1347 | null | hypothetical protein CNAG_05793                                         | 0 | 1  | 0 | 1  |
| CNAG_05797 | chr7 | 903154  | 906902  | 3748 | XRN2 | 5'-3' exoribonuclease 2                                                 | 0 | 1  | 0 | 1  |
| CNAG_05799 | chr7 | 908401  | 910178  | 1777 | CDA1 | chitin deacetylase                                                      | 0 | 1  | 0 | 1  |
| CNAG_05800 | chr7 | 911724  | 912471  | 747  | null | large subunit ribosomal protein L33-b                                   | 0 | 1  | 0 | 1  |
| CNAG_05803 | chr7 | 916011  | 919286  | 3275 | null | exo-beta-1,3-glucanase                                                  | 2 | 0  | 0 | 2  |
| CNAG_05804 | chr7 | 919627  | 925414  | 5787 | null | nuclear pore complex protein Nup188                                     | 2 | 2  | 2 | 6  |
| CNAG_05805 | chr7 | 925703  | 926863  | 1160 | null | hypothetical protein CNAG_05805                                         | 1 | 0  | 0 | 1  |
| CNAG_05807 | chr7 | 928057  | 929347  | 1290 | null | hypothetical protein CNAG_05807                                         | 0 | 0  | 1 | 1  |
| CNAG_05808 | chr7 | 929388  | 930666  | 1278 | null | syntaxin 18                                                             | 0 | 1  | 0 | 1  |
| CNAG_05811 | chr7 | 934412  | 935515  | 1103 | null | hypothetical protein CNAG_05811                                         | 0 | 0  | 1 | 1  |
| CNAG_05814 | chr7 | 942355  | 942904  | 549  | null | small subunit ribosomal protein S10e                                    | 0 | 1  | 0 | 1  |
| CNAG_05825 | chr7 | 969721  | 972416  | 2695 | null | minichromosome maintenance protein 7 (cell division control protein 47) | 0 | 0  | 1 | 1  |
| CNAG_05827 | chr7 | 975550  | 977102  | 1552 | null | methionine-tRNA ligase, beta subunit                                    | 0 | 0  | 2 | 2  |
| CNAG_05828 | chr7 | 977276  | 978941  | 1665 | null | UDP-N-acetylglucosamine pyrophosphorylase                               | 0 | 2  | 0 | 2  |
| CNAG_05829 | chr7 | 979312  | 983768  | 4456 | null | hypothetical protein CNAG_05829                                         | 0 | 0  | 1 | 1  |
| CNAG_05830 | chr7 | 984455  | 988114  | 3659 | null | cytoplasmic protein                                                     | 2 | 0  | 0 | 2  |
| CNAG_05833 | chr7 | 991130  | 993265  | 2135 | null | allantoate transporter                                                  | 0 | 1  | 0 | 1  |
| CNAG_05838 | chr7 | 1008850 | 1011921 | 3071 | RGD1 | GTPase activating protein                                               | 2 | 0  | 0 | 2  |
| CNAG_05839 | chr7 | 1012211 | 1013052 | 841  | null | cytochrome c oxidase subunit 6b                                         | 0 | 3  | 0 | 3  |
| CNAG_05840 | chr7 | 1013327 | 1014055 | 728  | null | hypothetical protein CNAG_05840                                         | 0 | 4  | 0 | 4  |
| CNAG_05841 | chr7 | 1014259 | 1016232 | 1973 | null | hypothetical protein CNAG_05841                                         | 3 | 0  | 2 | 5  |
| CNAG_05843 | chr7 | 1020297 | 1022266 | 1969 | null | translation initiation factor 4E                                        | 1 | 0  | 0 | 1  |
| CNAG_05844 | chr7 | 1022656 | 1023225 | 569  | null | mitochondrial import inner membrane translocase subunit TIM8            | 0 | 1  | 1 | 2  |
| CNAG_05846 | chr7 | 1024832 | 1028508 | 3676 | null | ubiquitin-conjugating enzyme E2 O                                       | 0 | 1  | 2 | 3  |
| CNAG_05847 | chr7 | 1029581 | 1031043 | 1462 | TRR1 | thioredoxin reductase                                                   | 0 | 6  | 0 | 6  |
| CNAG_07677 | chr7 | 1036998 | 1038200 | 1202 | null | hypothetical protein CNAG_07677                                         | 4 | 1  | 1 | 6  |
| CNAG_07679 | chr7 | 1052726 | 1054356 | 1630 | null | transcription elongation factor S-II                                    | 0 | 1  | 0 | 1  |
| CNAG_05861 | chr7 | 1059361 | 1061425 | 2064 | null | hypothetical protein CNAG_05861                                         | 1 | 1  | 0 | 2  |
| CNAG_05865 | chr7 | 1073902 | 1074938 | 1036 | null | 20S proteasome subunit beta 6                                           | 0 | 3  | 0 | 3  |
| CNAG_05866 | chr7 | 1075539 | 1078958 | 3419 | PRM1 | plasma membrane fusion protein PRM1                                     | 2 | 1  | 2 | 5  |
| CNAG_05867 | chr7 | 1080074 | 1081875 | 1801 | null | L-fucose transporter                                                    | 1 | 0  | 6 | 7  |
| CNAG_05868 | chr7 | 1082041 | 1082606 | 565  | null | glutamate-1-semialdehyde 2,1-aminomutase                                | 0 | 10 | 0 | 10 |

|                   |             |                |                |             |             |                                              |          |           |          |           |
|-------------------|-------------|----------------|----------------|-------------|-------------|----------------------------------------------|----------|-----------|----------|-----------|
| CNAG_05869        | chr7        | 1083606        | 1085485        | 1879        | null        | endopeptidase                                | 0        | 0         | 3        | 3         |
| CNAG_05871        | chr7        | 1087104        | 1087827        | 723         | null        | hypothetical protein CNAG_05871              | 0        | 3         | 1        | 4         |
| CNAG_05872        | chr7        | 1088487        | 1090524        | 2037        | null        | endopeptidase                                | 1        | 0         | 1        | 2         |
| CNAG_05873        | chr7        | 1091016        | 1092272        | 1256        | null        | hypothetical protein CNAG_05873              | 0        | 1         | 0        | 1         |
| CNAG_05874        | chr7        | 1093169        | 1095374        | 2205        | null        | hypothetical protein CNAG_05874              | 1        | 0         | 1        | 2         |
| CNAG_05875        | chr7        | 1095759        | 1096668        | 909         | null        | cytochrome c heme-lyase                      | 1        | 1         | 0        | 2         |
| CNAG_05877        | chr7        | 1097734        | 1099068        | 1334        | null        | CDK-activating kinase assembly factor MAT1   | 1        | 0         | 2        | 3         |
| CNAG_05879        | chr7        | 1101513        | 1101836        | 323         | null        | hypothetical protein CNAG_05879              | 0        | 0         | 1        | 1         |
| CNAG_07681        | chr7        | 1109684        | 1111203        | 1519        | null        | hypothetical protein CNAG_07681              | 0        | 0         | 1        | 1         |
| CNAG_05885        | chr7        | 1116116        | 1118204        | 2088        | null        | hypothetical protein CNAG_05885              | 0        | 1         | 0        | 1         |
| CNAG_05886        | chr7        | 1118971        | 1119814        | 843         | MMS2        | ubiquitin-conjugating enzyme E2              | 0        | 2         | 0        | 2         |
| CNAG_05887        | chr7        | 1120067        | 1121372        | 1305        | null        | pre-mRNA-splicing factor 18                  | 0        | 3         | 0        | 3         |
| CNAG_05888        | chr7        | 1121481        | 1121995        | 514         | null        | hypothetical protein CNAG_05888              | 2        | 2         | 0        | 4         |
| CNAG_05894        | chr7        | 1132927        | 1148016        | 15089       | null        | dynein heavy chain 1, cytosolic              | 0        | 1         | 3        | 4         |
| <b>CNAG_05903</b> | <b>chr7</b> | <b>1170289</b> | <b>1171602</b> | <b>1313</b> | <b>null</b> | <b>hypothetical protein CNAG_05903</b>       | <b>2</b> | <b>15</b> | <b>2</b> | <b>19</b> |
| CNAG_05905        | chr7        | 1172992        | 1175444        | 2452        | null        | transcription factor IIIB 90 kDa subunit     | 0        | 0         | 1        | 1         |
| CNAG_05906        | chr7        | 1175883        | 1177139        | 1256        | null        | hypothetical protein CNAG_05906              | 1        | 0         | 0        | 1         |
| CNAG_05908        | chr7        | 1182581        | 1185172        | 2591        | null        | hypothetical protein CNAG_05908              | 1        | 1         | 0        | 2         |
| CNAG_05909        | chr7        | 1187122        | 1188390        | 1268        | null        | cytochrome c1, heme protein, mitochondrial   | 0        | 1         | 0        | 1         |
| <b>CNAG_05910</b> | <b>chr7</b> | <b>1189418</b> | <b>1193699</b> | <b>4281</b> | <b>null</b> | <b>hypothetical protein CNAG_05910</b>       | <b>3</b> | <b>4</b>  | <b>5</b> | <b>12</b> |
| CNAG_05911        | chr7        | 1194262        | 1195759        | 1497        | null        | hypothetical protein CNAG_05911              | 6        | 0         | 1        | 7         |
| CNAG_05912        | chr7        | 1196368        | 1199805        | 3437        | null        | hypothetical protein CNAG_05912              | 0        | 1         | 0        | 1         |
| CNAG_05913        | chr7        | 1200590        | 1202647        | 2057        | null        | alpha-glucosidase                            | 0        | 1         | 0        | 1         |
| CNAG_05917        | chr7        | 1210607        | 1211256        | 649         | null        | hypothetical protein CNAG_05917              | 1        | 0         | 0        | 1         |
| CNAG_07682        | chr7        | 1222798        | 1227884        | 5086        | null        | hypothetical protein CNAG_07682              | 0        | 1         | 0        | 1         |
| CNAG_05933        | chr7        | 1250203        | 1252717        | 2514        | null        | hypothetical protein CNAG_05933              | 0        | 4         | 1        | 5         |
| CNAG_05934        | chr7        | 1253654        | 1254935        | 1281        | LIV15       | hypothetical protein CNAG_05934              | 0        | 2         | 0        | 2         |
| CNAG_05936        | chr7        | 1256635        | 1261872        | 5237        | null        | DNA-directed RNA polymerase III subunit RPC1 | 1        | 0         | 0        | 1         |
| CNAG_05939        | chr7        | 1266928        | 1267252        | 324         | null        | hypothetical protein CNAG_05939              | 0        | 1         | 0        | 1         |
| CNAG_07683        | chr7        | 1280016        | 1281080        | 1064        | null        | hypothetical protein CNAG_07683              | 0        | 3         | 0        | 3         |
| CNAG_07685        | chr7        | 1284516        | 1286566        | 2050        | null        | UMF1 family MFS transporter                  | 0        | 2         | 0        | 2         |
| CNAG_07686        | chr7        | 1287338        | 1291248        | 3910        | null        | topoisomerase 1-associated factor 1          | 0        | 0         | 1        | 1         |
| CNAG_07689        | chr7        | 1298002        | 1300752        | 2750        | null        | pre-mRNA-splicing factor CWC22               | 0        | 1         | 0        | 1         |
| CNAG_07690        | chr7        | 1302289        | 1303065        | 776         | null        | hypothetical protein CNAG_07690              | 0        | 1         | 0        | 1         |
| CNAG_07692        | chr7        | 1306836        | 1309960        | 3124        | null        | nucleoside phosphatase                       | 0        | 0         | 1        | 1         |
| CNAG_07188        | chr7        | 1310169        | 1315979        | 5810        | null        | hypothetical protein CNAG_07188              | 4        | 1         | 1        | 6         |
| CNAG_07693        | chr7        | 1317832        | 1320188        | 2356        | null        | high-affinity methionine permease            | 3        | 1         | 0        | 4         |
| CNAG_07695        | chr7        | 1323585        | 1325409        | 1824        | null        | gamma-aminobutyric acid transporter          | 0        | 0         | 1        | 1         |
| CNAG_07699        | chr7        | 1329889        | 1335387        | 5498        | null        | zinc finger family protein                   | 1        | 1         | 2        | 4         |
| CNAG_05962        | chr7        | 1343055        | 1344680        | 1625        | null        | hypothetical protein CNAG_05962              | 0        | 1         | 0        | 1         |
| CNAG_05963        | chr7        | 1345536        | 1347838        | 2302        | null        | hypothetical protein CNAG_05963              | 0        | 1         | 1        | 2         |
| CNAG_05964        | chr7        | 1347971        | 1349200        | 1229        | null        | poly(3-hydroxybutyrate) depolymerase         | 0        | 2         | 0        | 2         |
| CNAG_05967        | chr7        | 1353539        | 1354646        | 1107        | null        | hypothetical protein CNAG_05967              | 1        | 2         | 0        | 3         |
| CNAG_05968        | chr7        | 1355129        | 1355895        | 766         | CDC420      | cell division control protein 42             | 0        | 1         | 0        | 1         |
| CNAG_05978        | chr7        | 1385416        | 1388045        | 2629        | null        | glutamate-tRNA ligase                        | 0        | 0         | 1        | 1         |
| CNAG_05980        | chr7        | 1391518        | 1392789        | 1271        | null        | large subunit ribosomal protein L7/L12       | 0        | 1         | 0        | 1         |
| CNAG_06944        | chr8        | 3855           | 6312           | 2457        | null        | hypothetical protein CNAG_06944              | 2        | 0         | 0        | 2         |

|                   |             |               |               |             |               |                                                                        |          |          |          |           |
|-------------------|-------------|---------------|---------------|-------------|---------------|------------------------------------------------------------------------|----------|----------|----------|-----------|
| CNAG_07706        | chr8        | 10046         | 12151         | 2105        | null          | hypothetical protein CNAG_07706                                        | 0        | 0        | 1        | 1         |
| CNAG_07707        | chr8        | 21436         | 23958         | 2522        | null          | glycoside hydrolase family 3 domain-containing protein                 | 1        | 0        | 0        | 1         |
| CNAG_03090        | chr8        | 24519         | 26505         | 1986        | null          | hypothetical protein CNAG_03090                                        | 0        | 1        | 0        | 1         |
| CNAG_03091        | chr8        | 28052         | 29426         | 1374        | null          | hypothetical protein CNAG_03091                                        | 0        | 1        | 0        | 1         |
| CNAG_03101        | chr8        | 54135         | 56107         | 1972        | null          | efflux protein EncT                                                    | 0        | 1        | 0        | 1         |
| CNAG_03102        | chr8        | 57102         | 58433         | 1331        | null          | hypothetical protein CNAG_03102                                        | 0        | 1        | 1        | 2         |
| CNAG_03103        | chr8        | 58978         | 61734         | 2756        | null          | Cullin 3                                                               | 1        | 0        | 0        | 1         |
| CNAG_03108        | chr8        | 68241         | 70175         | 1934        | null          | hypothetical protein CNAG_03108                                        | 1        | 0        | 0        | 1         |
| CNAG_03109        | chr8        | 70428         | 72440         | 2012        | null          | ubiquitin carboxyl-terminal hydrolase 14                               | 0        | 0        | 1        | 1         |
| CNAG_03110        | chr8        | 73240         | 76533         | 3293        | null          | hypothetical protein CNAG_03110                                        | 2        | 0        | 1        | 3         |
| CNAG_07994        | chr8        | 77398         | 80100         | 2702        | null          | hypothetical protein CNAG_07994                                        | 1        | 0        | 0        | 1         |
| CNAG_03115        | chr8        | 85097         | 87498         | 2401        | null          | hypothetical protein CNAG_03115                                        | 0        | 0        | 2        | 2         |
| CNAG_07711        | chr8        | 87540         | 88112         | 572         | null          | hypothetical protein CNAG_07711                                        | 0        | 1        | 0        | 1         |
| CNAG_03117        | chr8        | 97494         | 102289        | 4795        | null          | hypothetical protein CNAG_03117                                        | 2        | 1        | 0        | 3         |
| CNAG_03120        | chr8        | 106153        | 114132        | 7979        | AGS1          | alpha-1,3-glucan synthase                                              | 1        | 0        | 0        | 1         |
| CNAG_03121        | chr8        | 115374        | 120079        | 4705        | null          | hypothetical protein CNAG_03121                                        | 0        | 0        | 1        | 1         |
| CNAG_03123        | chr8        | 123256        | 123862        | 606         | null          | hypothetical protein CNAG_03123                                        | 1        | 1        | 0        | 2         |
| CNAG_03125        | chr8        | 127699        | 129946        | 2247        | null          | hypothetical protein CNAG_03125                                        | 0        | 0        | 1        | 1         |
| CNAG_03135        | chr8        | 151598        | 154074        | 2476        | null          | hypothetical protein CNAG_03135                                        | 0        | 0        | 1        | 1         |
| CNAG_03140        | chr8        | 168779        | 170954        | 2175        | null          | sugar transporter                                                      | 0        | 0        | 1        | 1         |
| CNAG_03141        | chr8        | 171633        | 172358        | 725         | null          | hypothetical protein CNAG_03141                                        | 1        | 0        | 0        | 1         |
| CNAG_03150        | chr8        | 192767        | 194028        | 1261        | null          | solute carrier family 25 (mitochondrial folate transporter), member 32 | 0        | 0        | 1        | 1         |
| CNAG_03151        | chr8        | 194368        | 195863        | 1495        | CSN4          | COP9 signalosome complex subunit 4                                     | 1        | 1        | 0        | 2         |
| CNAG_03153        | chr8        | 198229        | 199434        | 1205        | SEC14-1       | sec14 cytosolic factor                                                 | 0        | 2        | 0        | 2         |
| CNAG_03154        | chr8        | 200430        | 201202        | 772         | null          | hypothetical protein CNAG_03154                                        | 1        | 0        | 0        | 1         |
| CNAG_03160        | chr8        | 214743        | 217680        | 2937        | null          | DNA cross-link repair 1A protein                                       | 0        | 0        | 1        | 1         |
| CNAG_03168        | chr8        | 233647        | 237026        | 3379        | null          | sulfite reductase (NADPH) flavoprotein alpha-component                 | 0        | 1        | 0        | 1         |
| CNAG_03171        | chr8        | 241906        | 245469        | 3563        | SWE1          | Wee protein kinase                                                     | 0        | 1        | 0        | 1         |
| CNAG_03172        | chr8        | 246420        | 247400        | 980         | null          | hypothetical protein CNAG_03172                                        | 1        | 0        | 0        | 1         |
| CNAG_03188        | chr8        | 290291        | 293439        | 3148        | SET202        | histone-lysine N-methyltransferase, H3 lysine-36 specific              | 0        | 0        | 2        | 2         |
| CNAG_03189        | chr8        | 293836        | 297624        | 3788        | null          | DIL and ankyrin domain-containing protein                              | 1        | 1        | 0        | 2         |
| CNAG_03190        | chr8        | 299574        | 301917        | 2343        | CCR4          | glucose-repressible alcohol dehydrogenase transcriptional effector     | 0        | 0        | 1        | 1         |
| CNAG_03193        | chr8        | 308381        | 310241        | 1860        | null          | hypothetical protein CNAG_03193                                        | 2        | 1        | 0        | 3         |
| CNAG_03194        | chr8        | 311449        | 313101        | 1652        | null          | saccharopine dehydrogenase                                             | 0        | 0        | 1        | 1         |
| CNAG_07717        | chr8        | 325159        | 329777        | 4618        | null          | ubiquitin carboxyl-terminal hydrolase 4/11/15                          | 1        | 0        | 0        | 1         |
| CNAG_03202        | chr8        | 330152        | 337452        | 7300        | CAC1          | adenylate cyclase                                                      | 2        | 0        | 1        | 3         |
| CNAG_03205        | chr8        | 341766        | 343799        | 2033        | null          | ATP-dependent RNA helicase ROK1                                        | 0        | 1        | 0        | 1         |
| CNAG_03206        | chr8        | 343992        | 345512        | 1520        | null          | endonuclease III                                                       | 0        | 0        | 1        | 1         |
| CNAG_03211        | chr8        | 354567        | 356070        | 1503        | null          | hypothetical protein CNAG_03211                                        | 0        | 1        | 0        | 1         |
| CNAG_03216        | chr8        | 367676        | 370405        | 2729        | null          | CAMK protein kinase                                                    | 0        | 1        | 0        | 1         |
| CNAG_03217        | chr8        | 370734        | 373800        | 3066        | null          | hypothetical protein CNAG_03217                                        | 0        | 1        | 0        | 1         |
| CNAG_03221        | chr8        | 380123        | 380677        | 554         | null          | large subunit ribosomal protein L29                                    | 0        | 3        | 0        | 3         |
| CNAG_03222        | chr8        | 381032        | 383181        | 2149        | null          | RNA lariat debranching enzyme                                          | 0        | 1        | 0        | 1         |
| CNAG_03225        | chr8        | 387416        | 388886        | 1470        | null          | malate dehydrogenase, NAD-dependent                                    | 0        | 1        | 0        | 1         |
| CNAG_03227        | chr8        | 392333        | 393371        | 1038        | null          | hypothetical protein CNAG_03227                                        | 0        | 3        | 1        | 4         |
| <b>CNAG_03229</b> | <b>chr8</b> | <b>395211</b> | <b>396697</b> | <b>1486</b> | <b>YOX101</b> | <b>specific transcriptional repressor</b>                              | <b>4</b> | <b>7</b> | <b>3</b> | <b>14</b> |
| CNAG_03230        | chr8        | 398101        | 398745        | 644         | null          | hypothetical protein CNAG_03230                                        | 2        | 8        | 0        | 10        |



|            |      |        |        |      |       |                                                     |   |   |   |   |
|------------|------|--------|--------|------|-------|-----------------------------------------------------|---|---|---|---|
| CNAG_03231 | chr8 | 400885 | 401562 | 677  | null  | hypothetical protein CNAG_03231                     | 2 | 7 | 0 | 9 |
| CNAG_03232 | chr8 | 402125 | 403325 | 1200 | null  | lactamase                                           | 0 | 1 | 0 | 1 |
| CNAG_03233 | chr8 | 404581 | 405238 | 657  | null  | hypothetical protein CNAG_03233                     | 0 | 2 | 0 | 2 |
| CNAG_03234 | chr8 | 406178 | 409470 | 3292 | null  | cell wall surface anchor protein                    | 4 | 1 | 2 | 7 |
| CNAG_03235 | chr8 | 409652 | 412413 | 2761 | null  | THO complex subunit 1                               | 1 | 3 | 1 | 5 |
| CNAG_03238 | chr8 | 415069 | 416267 | 1198 | null  | dioxygenase subfamily protein                       | 0 | 1 | 1 | 2 |
| CNAG_03239 | chr8 | 416572 | 417849 | 1277 | null  | hypothetical protein CNAG_03239                     | 1 | 0 | 0 | 1 |
| CNAG_03240 | chr8 | 419691 | 422563 | 2872 | null  | mannosyl-oligosaccharide 1,2-alpha-mannosidase      | 2 | 1 | 0 | 3 |
| CNAG_03247 | chr8 | 439081 | 443496 | 4415 | null  | sterol 3beta-glucosyltransferase                    | 0 | 1 | 0 | 1 |
| CNAG_03258 | chr8 | 505898 | 508168 | 2270 | null  | AGC protein kinase                                  | 0 | 2 | 1 | 3 |
| CNAG_03259 | chr8 | 509641 | 510069 | 428  | null  | hypothetical protein CNAG_03259                     | 0 | 2 | 0 | 2 |
| CNAG_03263 | chr8 | 514889 | 516569 | 1680 | TUF1  | translation elongation factor Tu                    | 0 | 0 | 1 | 1 |
| CNAG_03264 | chr8 | 516608 | 517725 | 1117 | null  | hypothetical protein CNAG_03264                     | 0 | 1 | 0 | 1 |
| CNAG_03265 | chr8 | 517990 | 520956 | 2966 | null  | hypothetical protein CNAG_03265                     | 2 | 0 | 0 | 2 |
| CNAG_03266 | chr8 | 522651 | 524285 | 1634 | null  | malate dehydrogenase, NAD-dependent                 | 0 | 2 | 0 | 2 |
| CNAG_03268 | chr8 | 527992 | 528454 | 462  | null  | hypothetical protein CNAG_03268                     | 0 | 1 | 0 | 1 |
| CNAG_03271 | chr8 | 534448 | 536353 | 1905 | null  | pre-mRNA-splicing factor PRP46                      | 2 | 0 | 0 | 2 |
| CNAG_03272 | chr8 | 537344 | 538843 | 1499 | null  | hypothetical protein CNAG_03272                     | 2 | 2 | 0 | 4 |
| CNAG_03275 | chr8 | 546580 | 548524 | 1944 | null  | glutaryl-CoA dehydrogenase                          | 0 | 1 | 1 | 2 |
| CNAG_03276 | chr8 | 548842 | 550326 | 1484 | null  | hypothetical protein CNAG_03276                     | 1 | 0 | 2 | 3 |
| CNAG_03279 | chr8 | 554569 | 557313 | 2744 | null  | hypothetical protein CNAG_03279                     | 0 | 0 | 1 | 1 |
| CNAG_03282 | chr8 | 561452 | 562836 | 1384 | null  | hypothetical protein CNAG_03282                     | 0 | 0 | 1 | 1 |
| CNAG_03284 | chr8 | 564540 | 565967 | 1427 | null  | rRNA biogenesis protein RRP36                       | 1 | 1 | 0 | 2 |
| CNAG_03285 | chr8 | 566262 | 568067 | 1805 | null  | hypothetical protein CNAG_03285                     | 1 | 0 | 0 | 1 |
| CNAG_03289 | chr8 | 573672 | 575516 | 1844 | null  | methionine aminopeptidase, type II                  | 1 | 0 | 0 | 1 |
| CNAG_03290 | chr8 | 575740 | 577890 | 2150 | null  | STE/STE20/YSK protein kinase                        | 0 | 1 | 0 | 1 |
| CNAG_03292 | chr8 | 582931 | 583510 | 579  | null  | hypothetical protein CNAG_03292                     | 0 | 5 | 0 | 5 |
| CNAG_03295 | chr8 | 589904 | 592678 | 2774 | null  | hypothetical protein CNAG_03295                     | 0 | 0 | 1 | 1 |
| CNAG_03299 | chr8 | 597594 | 601029 | 3435 | null  | coatomer beta subunit                               | 0 | 1 | 3 | 4 |
| CNAG_03304 | chr8 | 607814 | 609410 | 1596 | null  | hypothetical protein CNAG_03304                     | 1 | 0 | 0 | 1 |
| CNAG_03308 | chr8 | 615164 | 618483 | 3319 | null  | hypothetical protein CNAG_03308                     | 0 | 2 | 1 | 3 |
| CNAG_03311 | chr8 | 622927 | 624758 | 1831 | ERG13 | hydroxymethylglutaryl-CoA synthase                  | 1 | 1 | 0 | 2 |
| CNAG_03313 | chr8 | 626487 | 628335 | 1848 | null  | hypothetical protein CNAG_03313                     | 0 | 0 | 2 | 2 |
| CNAG_03314 | chr8 | 628784 | 631700 | 2916 | null  | YTH domain family 2                                 | 0 | 0 | 1 | 1 |
| CNAG_03319 | chr8 | 638163 | 641582 | 3419 | null  | phospholipid binding protein                        | 1 | 0 | 0 | 1 |
| CNAG_03327 | chr8 | 659488 | 660291 | 803  | null  | hypothetical protein CNAG_03327                     | 1 | 0 | 0 | 1 |
| CNAG_03329 | chr8 | 662943 | 664763 | 1820 | null  | PHD-finger protein                                  | 1 | 0 | 0 | 1 |
| CNAG_03330 | chr8 | 664959 | 666636 | 1677 | null  | RecQ-mediated genome instability protein 1          | 1 | 0 | 0 | 1 |
| CNAG_03332 | chr8 | 668775 | 670081 | 1306 | null  | replication factor C subunit 2/4                    | 0 | 2 | 0 | 2 |
| CNAG_03333 | chr8 | 670648 | 673560 | 2912 | null  | cytoplasmic protein                                 | 0 | 1 | 0 | 1 |
| CNAG_03337 | chr8 | 682367 | 682978 | 611  | null  | hypothetical protein CNAG_03337                     | 0 | 2 | 0 | 2 |
| CNAG_03339 | chr8 | 684431 | 686559 | 2128 | null  | biotin transporter                                  | 2 | 0 | 0 | 2 |
| CNAG_03341 | chr8 | 689458 | 692510 | 3052 | null  | minichromosome maintenance protein 2                | 1 | 1 | 0 | 2 |
| CNAG_03343 | chr8 | 694814 | 695857 | 1043 | null  | hypothetical protein CNAG_03343                     | 0 | 1 | 0 | 1 |
| CNAG_03347 | chr8 | 711146 | 713803 | 2657 | null  | ATP-dependent Clp protease ATP-binding subunit ClpB | 1 | 2 | 0 | 3 |
| CNAG_03348 | chr8 | 714434 | 717017 | 2583 | null  | hypothetical protein CNAG_03348                     | 1 | 1 | 0 | 2 |
| CNAG_03349 | chr8 | 719057 | 721284 | 2227 | null  | pre-mRNA-processing factor 17                       | 1 | 0 | 0 | 1 |

|            |      |         |         |      |      |                                                           |   |   |   |   |
|------------|------|---------|---------|------|------|-----------------------------------------------------------|---|---|---|---|
| CNAG_07724 | chr8 | 721729  | 725020  | 3291 | CUF1 | ligand-regulated transcription factor                     | 0 | 1 | 0 | 1 |
| CNAG_03354 | chr8 | 728169  | 729027  | 858  | null | hypothetical protein CNAG_03354                           | 0 | 1 | 0 | 1 |
| CNAG_03355 | chr8 | 730393  | 738152  | 7759 | TCO4 | hypothetical protein CNAG_03355                           | 2 | 0 | 1 | 3 |
| CNAG_03356 | chr8 | 738298  | 739608  | 1310 | null | hypothetical protein CNAG_03356                           | 1 | 0 | 0 | 1 |
| CNAG_03358 | chr8 | 742230  | 743796  | 1566 | null | phosphoglycerate kinase                                   | 0 | 0 | 1 | 1 |
| CNAG_03360 | chr8 | 745090  | 746790  | 1700 | null | hypothetical protein CNAG_03360                           | 0 | 0 | 1 | 1 |
| CNAG_03361 | chr8 | 747084  | 748851  | 1767 | null | hypothetical protein CNAG_03361                           | 0 | 1 | 0 | 1 |
| CNAG_03362 | chr8 | 748963  | 750774  | 1811 | null | hypothetical protein CNAG_03362                           | 0 | 1 | 0 | 1 |
| CNAG_03376 | chr8 | 791569  | 794219  | 2650 | null | cytoplasmic protein                                       | 0 | 1 | 0 | 1 |
| CNAG_03392 | chr8 | 832600  | 836769  | 4169 | null | DNA supercoiling protein                                  | 0 | 1 | 0 | 1 |
| CNAG_07728 | chr8 | 847574  | 847915  | 341  | null | solute carrier family 39 (zinc transporter), member 1/2/3 | 0 | 1 | 0 | 1 |
| CNAG_03405 | chr8 | 868668  | 870041  | 1373 | null | hypothetical protein CNAG_03405                           | 0 | 1 | 0 | 1 |
| CNAG_03418 | chr8 | 898941  | 903062  | 4121 | null | exportin-1                                                | 1 | 1 | 0 | 2 |
| CNAG_03425 | chr8 | 919285  | 922373  | 3088 | null | hypothetical protein CNAG_03425                           | 0 | 0 | 2 | 2 |
| CNAG_03427 | chr8 | 925140  | 928307  | 3167 | ACO1 | aconitate hydratase, mitochondrial                        | 2 | 0 | 0 | 2 |
| CNAG_07730 | chr8 | 928815  | 930002  | 1187 | null | tricarboxylate transporter                                | 0 | 0 | 1 | 1 |
| CNAG_07732 | chr8 | 931383  | 932392  | 1009 | null | amidohydrolase 2                                          | 1 | 0 | 0 | 1 |
| CNAG_03432 | chr8 | 937966  | 937966  | 1873 | null | solute carrier family 2                                   | 0 | 0 | 1 | 1 |
| CNAG_03433 | chr8 | 938300  | 939781  | 1481 | null | endo alpha-1,4 polygalactosaminidase precursor            | 1 | 0 | 0 | 1 |
| CNAG_03434 | chr8 | 940970  | 943865  | 2895 | null | solute carrier family 45, member 1/2/4                    | 1 | 2 | 0 | 3 |
| CNAG_03436 | chr8 | 945397  | 947174  | 1777 | null | alanine transaminase                                      | 0 | 2 | 0 | 2 |
| CNAG_03439 | chr8 | 955545  | 956395  | 850  | null | hypothetical protein CNAG_03439                           | 1 | 0 | 1 | 2 |
| CNAG_03441 | chr8 | 958811  | 959462  | 651  | null | small subunit ribosomal protein S21                       | 0 | 1 | 0 | 1 |
| CNAG_03443 | chr8 | 962315  | 962966  | 651  | null | hypothetical protein CNAG_03443                           | 0 | 1 | 1 | 2 |
| CNAG_03444 | chr8 | 963952  | 964607  | 655  | null | hypothetical protein CNAG_03444                           | 0 | 2 | 0 | 2 |
| CNAG_03450 | chr8 | 975965  | 981943  | 5978 | null | ATP-binding cassette transporter                          | 1 | 0 | 1 | 2 |
| CNAG_03451 | chr8 | 982238  | 985215  | 2977 | null | hypothetical protein CNAG_03451                           | 1 | 1 | 1 | 3 |
| CNAG_03453 | chr8 | 987848  | 991728  | 3880 | KIP1 | kinesin family member 11                                  | 2 | 0 | 0 | 2 |
| CNAG_03454 | chr8 | 992122  | 993410  | 1288 | null | hypothetical protein CNAG_03454                           | 0 | 2 | 0 | 2 |
| CNAG_03455 | chr8 | 996349  | 997313  | 964  | null | hypothetical protein CNAG_03455                           | 1 | 1 | 0 | 2 |
| CNAG_03456 | chr8 | 997366  | 998460  | 1094 | null | hypothetical protein CNAG_03456                           | 0 | 1 | 0 | 1 |
| CNAG_03458 | chr8 | 1001656 | 1002612 | 956  | null | hypothetical protein CNAG_03458                           | 0 | 1 | 1 | 2 |
| CNAG_03460 | chr8 | 1004986 | 1006248 | 1262 | null | phosphoglycerate dehydrogenase                            | 0 | 1 | 0 | 1 |
| CNAG_03461 | chr8 | 1007047 | 1008383 | 1336 | null | hypothetical protein CNAG_03461                           | 0 | 4 | 0 | 4 |
| CNAG_03464 | chr8 | 1013755 | 1016444 | 2689 | LAC2 | Cu-oxidase                                                | 2 | 0 | 0 | 2 |
| CNAG_03465 | chr8 | 1021759 | 1024340 | 2581 | LAC1 | laccase                                                   | 1 | 1 | 0 | 2 |
| CNAG_03466 | chr8 | 1025186 | 1029851 | 4665 | RDP1 | RNA-dependent RNA polymerase 1                            | 1 | 0 | 0 | 1 |
| CNAG_03467 | chr8 | 1030527 | 1031561 | 1034 | null | hypothetical protein CNAG_03467                           | 1 | 2 | 0 | 3 |
| CNAG_03468 | chr8 | 1032357 | 1035151 | 2794 | null | hypothetical protein CNAG_03468                           | 0 | 1 | 0 | 1 |
| CNAG_07736 | chr8 | 1038430 | 1041090 | 2660 | null | glucan endo-1,3-alpha-glucosidase agn1                    | 0 | 1 | 0 | 1 |
| CNAG_07738 | chr8 | 1047236 | 1047663 | 427  | null | hypothetical protein CNAG_07738                           | 1 | 0 | 0 | 1 |
| CNAG_03473 | chr8 | 1048240 | 1049365 | 1125 | null | lipoyl(octanoyl) transferase                              | 0 | 2 | 0 | 2 |
| CNAG_03474 | chr8 | 1049445 | 1051172 | 1727 | null | efflux protein EncT                                       | 0 | 0 | 1 | 1 |
| CNAG_03475 | chr8 | 1052386 | 1055172 | 2786 | null | hypothetical protein CNAG_03475                           | 0 | 1 | 1 | 2 |
| CNAG_03480 | chr8 | 1071785 | 1075494 | 3709 | null | hypothetical protein CNAG_03480                           | 1 | 1 | 0 | 2 |
| CNAG_03490 | chr8 | 1095028 | 1096579 | 1551 | null | hypothetical protein CNAG_03490                           | 1 | 0 | 0 | 1 |
| CNAG_03494 | chr8 | 1102723 | 1104435 | 1712 | null | hypothetical protein CNAG_03494                           | 1 | 0 | 0 | 1 |

|            |      |         |         |      |        |                                                        |   |   |   |   |
|------------|------|---------|---------|------|--------|--------------------------------------------------------|---|---|---|---|
| CNAG_03498 | chr8 | 1111329 | 1113683 | 2354 | FRE201 | metalloreductase                                       | 0 | 1 | 0 | 1 |
| CNAG_03500 | chr8 | 1117626 | 1123693 | 6067 | null   | osmosensor                                             | 0 | 1 | 0 | 1 |
| CNAG_03502 | chr8 | 1125071 | 1127981 | 2910 | ALR2   | magnesium transporter                                  | 0 | 1 | 0 | 1 |
| CNAG_03503 | chr8 | 1128340 | 1133301 | 4961 | YOR1   | ATP-binding cassette transporter protein YOR1          | 0 | 2 | 0 | 2 |
| CNAG_03504 | chr8 | 1136047 | 1141720 | 5673 | null   | hypothetical protein CNAG_03504                        | 0 | 2 | 0 | 2 |
| CNAG_07739 | chr8 | 1142109 | 1145250 | 3141 | null   | hypothetical protein CNAG_07739                        | 0 | 1 | 1 | 2 |
| CNAG_03509 | chr8 | 1148243 | 1149598 | 1355 | null   | pyruvate dehydrogenase X component                     | 1 | 0 | 0 | 1 |
| CNAG_03510 | chr8 | 1150713 | 1151316 | 603  | null   | large subunit ribosomal protein L36e                   | 0 | 1 | 0 | 1 |
| CNAG_03511 | chr8 | 1151532 | 1152112 | 580  | null   | hypothetical protein CNAG_03511                        | 0 | 2 | 0 | 2 |
| CNAG_03512 | chr8 | 1152471 | 1153714 | 1243 | null   | hypothetical protein CNAG_03512                        | 0 | 1 | 1 | 2 |
| CNAG_03513 | chr8 | 1153833 | 1155091 | 1258 | null   | ribosomal RNA-processing protein 7                     | 1 | 0 | 0 | 1 |
| CNAG_07740 | chr8 | 1155341 | 1156547 | 1206 | null   | hypothetical protein CNAG_07740                        | 0 | 0 | 1 | 1 |
| CNAG_03524 | chr8 | 1180709 | 1186594 | 5885 | null   | transmembrane receptor                                 | 0 | 3 | 0 | 3 |
| CNAG_03528 | chr8 | 1198427 | 1202221 | 3794 | null   | AP-2 complex subunit alpha                             | 0 | 1 | 0 | 1 |
| CNAG_07995 | chr8 | 1202853 | 1205833 | 2980 | null   | hypothetical protein CNAG_07995                        | 0 | 5 | 1 | 6 |
| CNAG_03531 | chr8 | 1206371 | 1207397 | 1026 | null   | 3-beta hydroxysteroid dehydrogenase/isomerase          | 2 | 0 | 1 | 3 |
| CNAG_03532 | chr8 | 1207965 | 1209003 | 1038 | null   | 3-beta hydroxysteroid dehydrogenase/isomerase          | 1 | 0 | 0 | 1 |
| CNAG_03533 | chr8 | 1209375 | 1212622 | 3247 | null   | JmjC domain-containing histone demethylation protein 1 | 1 | 0 | 1 | 2 |
| CNAG_03539 | chr8 | 1226784 | 1229272 | 2488 | null   | hypothetical protein CNAG_03539                        | 1 | 0 | 0 | 1 |
| CNAG_03543 | chr8 | 1238425 | 1241661 | 3236 | null   | hypothetical protein CNAG_03543                        | 1 | 0 | 1 | 2 |
| CNAG_03544 | chr8 | 1242305 | 1243254 | 949  | null   | hypothetical protein CNAG_03544                        | 0 | 1 | 0 | 1 |
| CNAG_03547 | chr8 | 1250273 | 1251079 | 806  | null   | hypothetical protein CNAG_03547                        | 1 | 1 | 1 | 3 |
| CNAG_03551 | chr8 | 1255993 | 1256390 | 397  | null   | hypothetical protein CNAG_03551                        | 0 | 1 | 0 | 1 |
| CNAG_03553 | chr8 | 1259499 | 1263316 | 3817 | null   | hypothetical protein CNAG_03553                        | 1 | 0 | 0 | 1 |
| CNAG_03556 | chr8 | 1269763 | 1271921 | 2158 | null   | dimethylaniline monooxygenase                          | 0 | 0 | 1 | 1 |
| CNAG_03562 | chr8 | 1282101 | 1283435 | 1334 | null   | D-amino-acid oxidase                                   | 0 | 1 | 0 | 1 |
| CNAG_03565 | chr8 | 1289492 | 1293714 | 4222 | null   | plasma-membrane proton-efflux P-type ATPase            | 0 | 0 | 1 | 1 |
| CNAG_03572 | chr8 | 1304898 | 1306114 | 1216 | OPS1   | opsin 1                                                | 1 | 0 | 0 | 1 |
| CNAG_07748 | chr8 | 1321708 | 1323092 | 1384 | null   | tRNA (uracil-5-)-methyltransferase TRM9                | 0 | 0 | 1 | 1 |
| CNAG_07749 | chr8 | 1323275 | 1324445 | 1170 | null   | 3-ketodihydrospingosine reductase TSC10                | 0 | 0 | 1 | 1 |
| CNAG_03582 | chr8 | 1326882 | 1330110 | 3228 | RIM20  | pH-response regulator protein palA/RIM20               | 0 | 0 | 1 | 1 |
| CNAG_03586 | chr8 | 1339453 | 1341097 | 1644 | null   | hypothetical protein CNAG_03586                        | 1 | 1 | 0 | 2 |
| CNAG_03592 | chr8 | 1357570 | 1359560 | 1990 | null   | phosphomethylpyrimidine kinase                         | 0 | 1 | 0 | 1 |
| CNAG_07751 | chr8 | 1359932 | 1361927 | 1995 | null   | siderophore iron transporter MirB                      | 0 | 1 | 0 | 1 |
| CNAG_06976 | chr8 | 1364624 | 1366333 | 1709 | FRE6   | ferric-chelate reductase                               | 1 | 0 | 0 | 1 |
| CNAG_06977 | chr8 | 1366722 | 1368262 | 1540 | null   | L-iditol 2-dehydrogenase                               | 0 | 0 | 1 | 1 |
| CNAG_06993 | chr8 | 1370189 | 1371594 | 1405 | null   | hypothetical protein CNAG_06993                        | 0 | 1 | 0 | 1 |
| CNAG_04103 | chr9 | 11549   | 13742   | 2193 | null   | hypothetical protein CNAG_04103                        | 0 | 2 | 0 | 2 |
| CNAG_04108 | chr9 | 24023   | 26178   | 2155 | null   | pyruvate dehydrogenase kinase                          | 0 | 1 | 0 | 1 |
| CNAG_04109 | chr9 | 26984   | 28599   | 1615 | null   | hypothetical protein CNAG_04109                        | 0 | 2 | 0 | 2 |
| CNAG_07756 | chr9 | 42531   | 44264   | 1733 | null   | cell division control protein                          | 0 | 2 | 0 | 2 |
| CNAG_04117 | chr9 | 49919   | 52595   | 2676 | null   | hypothetical protein CNAG_04117                        | 1 | 0 | 0 | 1 |
| CNAG_04118 | chr9 | 53393   | 57012   | 3619 | null   | CMGC/CDK/CRK7 protein kinase                           | 1 | 0 | 0 | 1 |
| CNAG_04121 | chr9 | 68507   | 68902   | 395  | null   | hypothetical protein CNAG_04121                        | 0 | 1 | 0 | 1 |
| CNAG_04130 | chr9 | 83556   | 85406   | 1850 | null   | hypothetical protein CNAG_04130                        | 0 | 1 | 0 | 1 |
| CNAG_07757 | chr9 | 96422   | 100522  | 4100 | null   | hypothetical protein CNAG_07757                        | 2 | 0 | 0 | 2 |
| CNAG_04136 | chr9 | 101022  | 102468  | 1446 | null   | methylthioribose-1-phosphate isomerase                 | 1 | 1 | 0 | 2 |

|            |      |        |        |      |       |                                                                 |   |   |   |   |
|------------|------|--------|--------|------|-------|-----------------------------------------------------------------|---|---|---|---|
| CNAG_04137 | chr9 | 102604 | 106242 | 3638 | null  | hypothetical protein CNAG_04137                                 | 0 | 1 | 0 | 1 |
| CNAG_04140 | chr9 | 111607 | 112000 | 393  | null  | hypothetical protein CNAG_04140                                 | 1 | 0 | 0 | 1 |
| CNAG_04142 | chr9 | 114921 | 116957 | 2036 | null  | tartrate transporter                                            | 0 | 2 | 0 | 2 |
| CNAG_04148 | chr9 | 131882 | 134549 | 2667 | null  | NEK protein kinase                                              | 1 | 0 | 0 | 1 |
| CNAG_04155 | chr9 | 151480 | 152016 | 536  | null  | small nuclear ribonucleoprotein E                               | 0 | 1 | 0 | 1 |
| CNAG_04161 | chr9 | 164272 | 166628 | 2356 | null  | hypothetical protein CNAG_04161                                 | 0 | 2 | 0 | 2 |
| CNAG_04165 | chr9 | 177374 | 178387 | 1013 | null  | hypothetical protein CNAG_04165                                 | 0 | 1 | 0 | 1 |
| CNAG_04167 | chr9 | 179873 | 181591 | 1718 | null  | hypothetical protein CNAG_04167                                 | 0 | 1 | 0 | 1 |
| CNAG_04169 | chr9 | 184842 | 185422 | 580  | null  | holo                                                            | 0 | 1 | 1 | 2 |
| CNAG_04172 | chr9 | 190879 | 194016 | 3137 | null  | transcription factor C subunit 6                                | 0 | 1 | 0 | 1 |
| CNAG_04175 | chr9 | 200310 | 201775 | 1465 | null  | hypothetical protein CNAG_04175                                 | 1 | 0 | 1 | 2 |
| CNAG_04179 | chr9 | 215113 | 217253 | 2140 | null  | lysine-tRNA ligase                                              | 1 | 1 | 0 | 2 |
| CNAG_04180 | chr9 | 217459 | 218392 | 933  | null  | large subunit ribosomal protein L15                             | 1 | 0 | 0 | 1 |
| CNAG_04183 | chr9 | 223117 | 226359 | 3242 | null  | hypothetical protein CNAG_04183                                 | 1 | 0 | 0 | 1 |
| CNAG_04186 | chr9 | 234218 | 235035 | 817  | null  | hypothetical protein CNAG_04186                                 | 0 | 0 | 1 | 1 |
| CNAG_04187 | chr9 | 235655 | 237615 | 1960 | null  | GPI-anchored wall transfer protein 1                            | 2 | 0 | 0 | 2 |
| CNAG_04189 | chr9 | 240206 | 242875 | 2669 | null  | succinate dehydrogenase                                         | 0 | 1 | 2 | 3 |
| CNAG_04192 | chr9 | 251743 | 255810 | 4067 | null  | phosphoribosylformylglycinamide synthase                        | 0 | 1 | 1 | 2 |
| CNAG_04193 | chr9 | 256388 | 257013 | 625  | null  | hypothetical protein CNAG_04193                                 | 0 | 1 | 0 | 1 |
| CNAG_04197 | chr9 | 264161 | 268128 | 3967 | null  | CMGC/DYRK/YAK protein kinase                                    | 0 | 0 | 1 | 1 |
| CNAG_04204 | chr9 | 285709 | 286208 | 499  | null  | transcription elongation factor SPT4                            | 0 | 1 | 0 | 1 |
| CNAG_04206 | chr9 | 289082 | 290029 | 947  | null  | hypothetical protein CNAG_04206                                 | 0 | 1 | 0 | 1 |
| CNAG_07762 | chr9 | 291486 | 292074 | 588  | null  | hypothetical protein CNAG_07762                                 | 0 | 1 | 0 | 1 |
| CNAG_04207 | chr9 | 292512 | 294915 | 2403 | null  | homeobox protein cut-like                                       | 1 | 0 | 0 | 1 |
| CNAG_04210 | chr9 | 300460 | 302602 | 2142 | null  | MFS transporter, SP family, general alpha glucoside:H symporter | 0 | 1 | 0 | 1 |
| CNAG_04211 | chr9 | 303764 | 306281 | 2517 | null  | nuclear RNA export factor 1/2                                   | 0 | 0 | 1 | 1 |
| CNAG_04212 | chr9 | 306503 | 307176 | 673  | null  | hypothetical protein CNAG_04212                                 | 0 | 2 | 0 | 2 |
| CNAG_04213 | chr9 | 307694 | 311942 | 4248 | null  | signal transducer                                               | 0 | 1 | 0 | 1 |
| CNAG_04216 | chr9 | 317698 | 318435 | 737  | null  | hypothetical protein CNAG_04216                                 | 1 | 0 | 0 | 1 |
| CNAG_04219 | chr9 | 325054 | 325921 | 867  | null  | lactoylglutathione lyase                                        | 0 | 1 | 0 | 1 |
| CNAG_04221 | chr9 | 329117 | 331282 | 2165 | null  | 6-phosphofructo-2-kinase/fructose-2,6-bisphosphatase            | 0 | 0 | 1 | 1 |
| CNAG_04225 | chr9 | 337912 | 339915 | 2003 | null  | hypothetical protein CNAG_04225                                 | 2 | 0 | 1 | 3 |
| CNAG_04226 | chr9 | 340643 | 342933 | 2290 | null  | U4/U6.U5 tri-snRNP-associated protein 1                         | 1 | 0 | 0 | 1 |
| CNAG_04227 | chr9 | 343072 | 349137 | 6065 | null  | hypothetical protein CNAG_04227                                 | 1 | 3 | 1 | 5 |
| CNAG_04229 | chr9 | 352155 | 353322 | 1167 | null  | phytanoyl-CoA dioxygenase                                       | 1 | 0 | 2 | 3 |
| CNAG_04232 | chr9 | 359257 | 359852 | 595  | null  | hypothetical protein CNAG_04232                                 | 0 | 1 | 0 | 1 |
| CNAG_04234 | chr9 | 362164 | 363148 | 984  | null  | hypothetical protein CNAG_04234                                 | 0 | 2 | 0 | 2 |
| CNAG_04235 | chr9 | 363351 | 364042 | 691  | null  | hypothetical protein CNAG_04235                                 | 1 | 0 | 0 | 1 |
| CNAG_04238 | chr9 | 366455 | 367659 | 1204 | null  | peroxisomal 2,4-dienoyl-CoA reductase                           | 0 | 0 | 1 | 1 |
| CNAG_04241 | chr9 | 371053 | 378492 | 7439 | null  | cytoplasmic protein                                             | 1 | 2 | 2 | 5 |
| CNAG_04242 | chr9 | 378885 | 381129 | 2244 | null  | hypothetical protein CNAG_04242                                 | 0 | 1 | 0 | 1 |
| CNAG_04243 | chr9 | 384843 | 388564 | 3721 | CDC24 | cell division control protein 24                                | 0 | 2 | 0 | 2 |
| CNAG_04244 | chr9 | 389287 | 392475 | 3188 | null  | hypothetical protein CNAG_04244                                 | 1 | 1 | 1 | 3 |
| CNAG_04245 | chr9 | 394168 | 396817 | 2649 | CHI22 | chitinase                                                       | 2 | 1 | 0 | 3 |
| CNAG_04246 | chr9 | 397311 | 398390 | 1079 | null  | hypothetical protein CNAG_04246                                 | 2 | 0 | 1 | 3 |
| CNAG_04247 | chr9 | 398485 | 402375 | 3890 | null  | hypothetical protein CNAG_04247                                 | 1 | 0 | 0 | 1 |
| CNAG_04252 | chr9 | 405726 | 408471 | 2745 | null  | hypothetical protein CNAG_04252                                 | 1 | 0 | 0 | 1 |

|                   |             |               |               |             |             |                                                      |          |          |          |           |
|-------------------|-------------|---------------|---------------|-------------|-------------|------------------------------------------------------|----------|----------|----------|-----------|
| CNAG_04254        | chr9        | 411118        | 413164        | 2046        | null        | hypothetical protein CNAG_04254                      | 1        | 0        | 0        | 1         |
| CNAG_04258        | chr9        | 418358        | 419010        | 652         | ARF1        | arf/Sar family protein                               | 0        | 0        | 1        | 1         |
| CNAG_04262        | chr9        | 424198        | 426565        | 2367        | null        | E3 ubiquitin-protein ligase NRDP1                    | 0        | 0        | 2        | 2         |
| CNAG_04263        | chr9        | 427114        | 429540        | 2426        | null        | hypothetical protein CNAG_04263                      | 1        | 0        | 0        | 1         |
| CNAG_04264        | chr9        | 429820        | 431793        | 1973        | null        | ubiquinone biosynthesis monooxygenase COQ6           | 0        | 1        | 0        | 1         |
| CNAG_04267        | chr9        | 435845        | 437022        | 1177        | null        | mitochondrial genome maintenance protein             | 1        | 0        | 0        | 1         |
| CNAG_04268        | chr9        | 437346        | 439920        | 2574        | null        | exodeoxyribonuclease III                             | 1        | 1        | 0        | 2         |
| CNAG_04275        | chr9        | 453709        | 455604        | 1895        | null        | metalloendopeptidase                                 | 1        | 0        | 0        | 1         |
| CNAG_04283        | chr9        | 478289        | 480700        | 2411        | null        | integral membrane protein                            | 0        | 4        | 0        | 4         |
| CNAG_04285        | chr9        | 484823        | 485770        | 947         | null        | hypothetical protein CNAG_04285                      | 0        | 1        | 0        | 1         |
| CNAG_04289        | chr9        | 489662        | 492489        | 2827        | null        | hypothetical protein CNAG_04289                      | 0        | 3        | 0        | 3         |
| <b>CNAG_04292</b> | <b>chr9</b> | <b>495878</b> | <b>496990</b> | <b>1112</b> | <b>null</b> | <b>hypothetical protein CNAG_04292</b>               | <b>0</b> | <b>8</b> | <b>3</b> | <b>11</b> |
| CNAG_04293        | chr9        | 497681        | 501496        | 3815        | VPS41       | vacuolar protein sorting 41                          | 0        | 0        | 1        | 1         |
| CNAG_04294        | chr9        | 501650        | 502198        | 548         | null        | hypothetical protein CNAG_04294                      | 0        | 1        | 0        | 1         |
| CNAG_04296        | chr9        | 504818        | 505762        | 944         | null        | hypothetical protein CNAG_04296                      | 0        | 1        | 0        | 1         |
| CNAG_04298        | chr9        | 507561        | 510395        | 2834        | null        | nucleolar complex protein 3                          | 0        | 1        | 0        | 1         |
| CNAG_04299        | chr9        | 510690        | 511010        | 320         | null        | hypothetical protein CNAG_04299                      | 1        | 0        | 0        | 1         |
| CNAG_04301        | chr9        | 512298        | 514583        | 2285        | null        | hypothetical protein CNAG_04301                      | 0        | 0        | 1        | 1         |
| CNAG_04302        | chr9        | 514766        | 517103        | 2337        | null        | hypothetical protein CNAG_04302                      | 0        | 0        | 1        | 1         |
| CNAG_04303        | chr9        | 517443        | 520398        | 2955        | null        | E3 ubiquitin-protein ligase BRE1                     | 1        | 0        | 0        | 1         |
| CNAG_04304        | chr9        | 520833        | 522925        | 2092        | null        | T-complex protein 1 subunit zeta                     | 0        | 1        | 0        | 1         |
| CNAG_04307        | chr9        | 526410        | 527798        | 1388        | URO1        | urate oxidase                                        | 0        | 2        | 0        | 2         |
| CNAG_04308        | chr9        | 528315        | 529896        | 1581        | HAD1        | 3-hydroxyacyl-CoA dehydrogenase                      | 0        | 0        | 1        | 1         |
| CNAG_04310        | chr9        | 531720        | 533544        | 1824        | null        | hypothetical protein CNAG_04310                      | 0        | 1        | 0        | 1         |
| CNAG_04311        | chr9        | 533816        | 535626        | 1810        | null        | charged multivesicular body protein 7                | 0        | 0        | 1        | 1         |
| CNAG_04315        | chr9        | 542846        | 545524        | 2678        | null        | hypothetical protein CNAG_04315                      | 1        | 1        | 0        | 2         |
| CNAG_04316        | chr9        | 546426        | 549571        | 3145        | null        | NAD kinase                                           | 1        | 1        | 1        | 3         |
| CNAG_04317        | chr9        | 549916        | 551427        | 1511        | null        | hypothetical protein CNAG_04317                      | 3        | 0        | 0        | 3         |
| CNAG_04318        | chr9        | 551542        | 555124        | 3582        | null        | telomere length regulation protein                   | 4        | 0        | 1        | 5         |
| CNAG_04319        | chr9        | 555415        | 556035        | 620         | null        | hypothetical protein CNAG_04319                      | 0        | 1        | 0        | 1         |
| CNAG_04320        | chr9        | 556375        | 558054        | 1679        | CPS1        | polysaccharide synthase Cps1p                        | 0        | 1        | 1        | 2         |
| CNAG_04324        | chr9        | 567440        | 570158        | 2718        | null        | hypothetical protein CNAG_04324                      | 0        | 1        | 1        | 2         |
| CNAG_04325        | chr9        | 571124        | 572330        | 1206        | null        | extradiol ring-cleavage dioxygenase                  | 0        | 0        | 1        | 1         |
| CNAG_04326        | chr9        | 572417        | 574857        | 2440        | null        | malate dehydrogenase (oxaloacetate-decarboxylating)  | 1        | 0        | 1        | 2         |
| CNAG_04330        | chr9        | 583135        | 584779        | 1644        | null        | hypothetical protein CNAG_04330                      | 0        | 1        | 0        | 1         |
| CNAG_04333        | chr9        | 591905        | 594210        | 2305        | null        | hypothetical protein CNAG_04333                      | 0        | 1        | 0        | 1         |
| CNAG_04335        | chr9        | 596225        | 603495        | 7270        | null        | phosphatidylinositol 4-kinase                        | 1        | 0        | 0        | 1         |
| CNAG_04339        | chr9        | 609400        | 612004        | 2604        | null        | exocyst complex component EXO84                      | 0        | 1        | 0        | 1         |
| CNAG_04341        | chr9        | 615438        | 619038        | 3600        | null        | recyclin-1                                           | 2        | 0        | 0        | 2         |
| CNAG_04345        | chr9        | 628080        | 631545        | 3465        | null        | specific RNA polymerase II transcription factor      | 1        | 1        | 0        | 2         |
| CNAG_04348        | chr9        | 636854        | 638194        | 1340        | null        | chaperone                                            | 0        | 1        | 0        | 1         |
| CNAG_04353        | chr9        | 648889        | 651230        | 2341        | null        | hypothetical protein CNAG_04353                      | 0        | 0        | 2        | 2         |
| CNAG_04357        | chr9        | 658614        | 659422        | 808         | null        | hypothetical protein CNAG_04357                      | 0        | 1        | 0        | 1         |
| CNAG_04358        | chr9        | 659598        | 662062        | 2464        | ATM1        | iron-sulfur clusters transporter ATM1, mitochondrial | 0        | 1        | 0        | 1         |
| CNAG_04359        | chr9        | 662580        | 666258        | 3678        | null        | hypothetical protein CNAG_04359                      | 0        | 1        | 0        | 1         |
| CNAG_04362        | chr9        | 672766        | 674969        | 2203        | null        | ATP-dependent RNA helicase DBP5                      | 1        | 0        | 0        | 1         |
| CNAG_04377        | chr9        | 713030        | 717298        | 4268        | null        | vacuolar protein                                     | 1        | 3        | 0        | 4         |

|            |      |         |         |       |      |                                                        |   |   |   |   |
|------------|------|---------|---------|-------|------|--------------------------------------------------------|---|---|---|---|
| CNAG_04380 | chr9 | 719689  | 722166  | 2477  | null | peptidase                                              | 0 | 1 | 3 | 4 |
| CNAG_04383 | chr9 | 726739  | 727704  | 965   | null | acetyltransferase                                      | 1 | 0 | 0 | 1 |
| CNAG_04384 | chr9 | 727941  | 728807  | 866   | null | peptidyl-tRNA hydrolase                                | 0 | 1 | 0 | 1 |
| CNAG_04395 | chr9 | 752754  | 754334  | 1580  | null | protein BFR2                                           | 1 | 0 | 0 | 1 |
| CNAG_04401 | chr9 | 762970  | 764125  | 1155  | null | alpha-soluble NSF attachment protein                   | 0 | 0 | 1 | 1 |
| CNAG_04402 | chr9 | 764356  | 765308  | 952   | null | splicing factor U2AF 35 kDa subunit                    | 0 | 1 | 0 | 1 |
| CNAG_04403 | chr9 | 765460  | 767204  | 1744  | null | CCCH zinc finger protein                               | 0 | 1 | 0 | 1 |
| CNAG_04410 | chr9 | 780379  | 782401  | 2022  | null | endoplasmic reticulum protein                          | 0 | 0 | 1 | 1 |
| CNAG_04411 | chr9 | 782550  | 784208  | 1658  | null | hypothetical protein CNAG_04411                        | 1 | 1 | 1 | 3 |
| CNAG_04413 | chr9 | 787063  | 788542  | 1479  | null | hypothetical protein CNAG_04413                        | 1 | 0 | 0 | 1 |
| CNAG_04416 | chr9 | 795368  | 797389  | 2021  | null | major facilitator superfamily transporter              | 0 | 0 | 1 | 1 |
| CNAG_07768 | chr9 | 799086  | 799478  | 392   | null | hypothetical protein CNAG_07768                        | 0 | 3 | 1 | 4 |
| CNAG_07769 | chr9 | 840577  | 852305  | 11728 | TOM1 | E3 ubiquitin-protein ligase HUWE1                      | 1 | 0 | 0 | 1 |
| CNAG_04433 | chr9 | 854944  | 860523  | 5579  | null | CMGC/DYRK/DYRK2 protein kinase                         | 1 | 0 | 1 | 2 |
| CNAG_04434 | chr9 | 860926  | 864228  | 3302  | null | hypothetical protein CNAG_04434                        | 0 | 0 | 1 | 1 |
| CNAG_04439 | chr9 | 873060  | 875153  | 2093  | null | V-type proton ATPase subunit B                         | 0 | 1 | 0 | 1 |
| CNAG_04441 | chr9 | 876626  | 878793  | 2167  | null | polyadenylate-binding protein, cytoplasmic and nuclear | 0 | 1 | 0 | 1 |
| CNAG_04443 | chr9 | 880908  | 882153  | 1245  | null | hypothetical protein CNAG_04443                        | 1 | 2 | 0 | 3 |
| CNAG_04446 | chr9 | 887452  | 888610  | 1158  | null | hypothetical protein CNAG_04446                        | 0 | 0 | 2 | 2 |
| CNAG_04451 | chr9 | 901435  | 904412  | 2977  | null | ribonuclease P/MRP protein subunit POP1                | 0 | 0 | 2 | 2 |
| CNAG_04453 | chr9 | 905446  | 906895  | 1449  | IPC1 | inositolphosphorylceramide synthase                    | 1 | 0 | 0 | 1 |
| CNAG_04454 | chr9 | 907132  | 908194  | 1062  | null | hypothetical protein CNAG_04454                        | 1 | 1 | 0 | 2 |
| CNAG_04457 | chr9 | 914368  | 915684  | 1316  | null | hypothetical protein CNAG_04457                        | 0 | 1 | 0 | 1 |
| CNAG_04460 | chr9 | 921083  | 922873  | 1790  | null | RNA polymerase II transcription factor                 | 0 | 1 | 0 | 1 |
| CNAG_04461 | chr9 | 923265  | 929403  | 6138  | HFM1 | ATP-dependent DNA helicase HFM1/MER3                   | 1 | 0 | 0 | 1 |
| CNAG_04462 | chr9 | 929511  | 931529  | 2018  | null | F-box protein 9                                        | 0 | 1 | 1 | 2 |
| CNAG_04463 | chr9 | 931725  | 932521  | 796   | null | hypothetical protein CNAG_04463                        | 1 | 0 | 0 | 1 |
| CNAG_04466 | chr9 | 936397  | 938746  | 2349  | null | hypothetical protein CNAG_04466                        | 0 | 1 | 0 | 1 |
| CNAG_04467 | chr9 | 939356  | 941311  | 1955  | null | succinate-semialdehyde dehydrogenase (NADP)            | 0 | 2 | 0 | 2 |
| CNAG_04468 | chr9 | 941767  | 943259  | 1492  | null | tartrate dehydrogenase                                 | 0 | 0 | 1 | 1 |
| CNAG_04469 | chr9 | 943620  | 945383  | 1763  | null | 4-aminobutyrate transaminase                           | 0 | 2 | 1 | 3 |
| CNAG_04470 | chr9 | 946041  | 946952  | 911   | null | haloacid dehalogenase, type II                         | 0 | 1 | 0 | 1 |
| CNAG_04471 | chr9 | 947441  | 949222  | 1781  | null | FAD dependent oxidoreductase                           | 0 | 1 | 0 | 1 |
| CNAG_04472 | chr9 | 949899  | 951689  | 1790  | null | membrane protein                                       | 1 | 0 | 0 | 1 |
| CNAG_04475 | chr9 | 959137  | 960190  | 1053  | null | hypothetical protein CNAG_04475                        | 1 | 1 | 0 | 2 |
| CNAG_04476 | chr9 | 960381  | 963440  | 3059  | null | hypothetical protein CNAG_04476                        | 2 | 0 | 2 | 4 |
| CNAG_07771 | chr9 | 964714  | 967625  | 2911  | null | peptidase                                              | 0 | 1 | 0 | 1 |
| CNAG_04478 | chr9 | 968037  | 971128  | 3091  | null | hypothetical protein CNAG_04478                        | 2 | 1 | 2 | 5 |
| CNAG_04479 | chr9 | 971585  | 973214  | 1629  | null | hypothetical protein CNAG_04479                        | 0 | 0 | 1 | 1 |
| CNAG_07772 | chr9 | 973346  | 976575  | 3229  | null | hypothetical protein CNAG_07772                        | 2 | 2 | 2 | 6 |
| CNAG_07773 | chr9 | 977371  | 979477  | 2106  | null | hypothetical protein CNAG_07773                        | 0 | 1 | 0 | 1 |
| CNAG_07774 | chr9 | 979819  | 982146  | 2327  | null | hypothetical protein CNAG_07774                        | 2 | 0 | 2 | 4 |
| CNAG_04484 | chr9 | 983144  | 986823  | 3679  | null | hypothetical protein CNAG_04484                        | 1 | 0 | 0 | 1 |
| CNAG_04485 | chr9 | 987131  | 989549  | 2418  | null | long-chain acyl-CoA synthetase                         | 0 | 0 | 1 | 1 |
| CNAG_04486 | chr9 | 990661  | 991544  | 883   | null | hypothetical protein CNAG_04486                        | 0 | 1 | 0 | 1 |
| CNAG_07777 | chr9 | 999087  | 999797  | 710   | null | hypothetical protein CNAG_07777                        | 0 | 1 | 0 | 1 |
| CNAG_04492 | chr9 | 1000069 | 1002725 | 2656  | null | hypothetical protein CNAG_04492                        | 1 | 0 | 1 | 2 |

|                   |             |                |                |             |             |                                                                                                 |          |          |          |           |
|-------------------|-------------|----------------|----------------|-------------|-------------|-------------------------------------------------------------------------------------------------|----------|----------|----------|-----------|
| CNAG_04493        | chr9        | 1003331        | 1006922        | 3591        | null        | ubiquitin carboxyl-terminal hydrolase 48                                                        | 2        | 5        | 0        | 7         |
| CNAG_04495        | chr9        | 1009095        | 1009868        | 773         | null        | hypothetical protein CNAG_04495                                                                 | 1        | 3        | 0        | 4         |
| CNAG_04496        | chr9        | 1010368        | 1014044        | 3676        | null        | rab GTPase activator                                                                            | 1        | 1        | 3        | 5         |
| CNAG_04497        | chr9        | 1014541        | 1015683        | 1142        | null        | hypothetical protein CNAG_04497                                                                 | 0        | 1        | 0        | 1         |
| CNAG_04498        | chr9        | 1015954        | 1019570        | 3616        | null        | alpha-1,2-mannosidase                                                                           | 0        | 0        | 1        | 1         |
| CNAG_04499        | chr9        | 1020456        | 1021550        | 1094        | null        | clathrin light chain                                                                            | 1        | 0        | 0        | 1         |
| CNAG_04500        | chr9        | 1021773        | 1024046        | 2273        | null        | hypothetical protein CNAG_04500                                                                 | 1        | 0        | 0        | 1         |
| CNAG_04501        | chr9        | 1024146        | 1026500        | 2354        | TRP1        | anthranilate synthase/indole-3-glycerol phosphate synthase/phosphoribosylanthranilate isomerase | 1        | 0        | 0        | 1         |
| CNAG_04502        | chr9        | 1027279        | 1030718        | 3439        | null        | hypothetical protein CNAG_04502                                                                 | 0        | 2        | 0        | 2         |
| CNAG_04504        | chr9        | 1032945        | 1034521        | 1576        | null        | hypothetical protein CNAG_04504                                                                 | 0        | 0        | 1        | 1         |
| CNAG_04505        | chr9        | 1036332        | 1037938        | 1606        | GPA1        | guanine nucleotide-binding protein subunit alpha                                                | 0        | 3        | 0        | 3         |
| CNAG_04506        | chr9        | 1041920        | 1043142        | 1222        | null        | hypothetical protein CNAG_04506                                                                 | 1        | 0        | 0        | 1         |
| CNAG_04507        | chr9        | 1043724        | 1044981        | 1257        | null        | hypothetical protein CNAG_04507                                                                 | 0        | 1        | 0        | 1         |
| CNAG_04508        | chr9        | 1046488        | 1047414        | 926         | null        | hypothetical protein CNAG_04508                                                                 | 0        | 1        | 0        | 1         |
| CNAG_04509        | chr9        | 1048030        | 1049278        | 1248        | null        | hypothetical protein CNAG_04509                                                                 | 1        | 0        | 1        | 2         |
| CNAG_04513        | chr9        | 1054403        | 1058448        | 4045        | null        | DNA-directed RNA polymerase III subunit RPC2                                                    | 0        | 1        | 0        | 1         |
| CNAG_04514        | chr9        | 1058771        | 1060580        | 1809        | MPK1        | CMGC/MAPK protein kinase                                                                        | 2        | 0        | 0        | 2         |
| CNAG_04518        | chr9        | 1067183        | 1069760        | 2577        | null        | hypothetical protein CNAG_04518                                                                 | 0        | 1        | 0        | 1         |
| CNAG_04520        | chr9        | 1072301        | 1074293        | 1992        | null        | D-aminoacylase                                                                                  | 0        | 1        | 0        | 1         |
| CNAG_04521        | chr9        | 1076601        | 1078434        | 1833        | null        | oxidoreductase                                                                                  | 0        | 1        | 1        | 2         |
| CNAG_04522        | chr9        | 1079853        | 1081435        | 1582        | null        | hypothetical protein CNAG_04522                                                                 | 0        | 1        | 1        | 2         |
| CNAG_04524        | chr9        | 1084902        | 1088197        | 3295        | null        | zinc metalloprotease                                                                            | 1        | 0        | 0        | 1         |
| CNAG_04526        | chr9        | 1091869        | 1093518        | 1649        | null        | hypothetical protein CNAG_04526                                                                 | 3        | 0        | 0        | 3         |
| CNAG_04527        | chr9        | 1093802        | 1095055        | 1253        | null        | hypothetical protein CNAG_04527                                                                 | 0        | 2        | 0        | 2         |
| <b>CNAG_04528</b> | <b>chr9</b> | <b>1095325</b> | <b>1098629</b> | <b>3304</b> | <b>null</b> | <b>hypothetical protein CNAG_04528</b>                                                          | <b>8</b> | <b>0</b> | <b>4</b> | <b>12</b> |
| CNAG_04529        | chr9        | 1099033        | 1099619        | 586         | null        | cytochrome c oxidase-assembly factor COX16                                                      | 0        | 1        | 0        | 1         |
| CNAG_04530        | chr9        | 1099830        | 1101257        | 1427        | null        | DNA-binding protein                                                                             | 0        | 1        | 0        | 1         |
| CNAG_04531        | chr9        | 1101680        | 1102697        | 1017        | null        | enoyl-CoA hydratase                                                                             | 0        | 1        | 0        | 1         |
| CNAG_04534        | chr9        | 1106819        | 1110016        | 3197        | null        | hypothetical protein CNAG_04534                                                                 | 1        | 0        | 0        | 1         |
| CNAG_04535        | chr9        | 1110498        | 1111916        | 1418        | null        | tartrate dehydrogenase                                                                          | 0        | 1        | 0        | 1         |
| CNAG_04536        | chr9        | 1112968        | 1115229        | 2261        | null        | nicotinamide mononucleotide permease                                                            | 0        | 2        | 0        | 2         |
| CNAG_04537        | chr9        | 1115470        | 1117090        | 1620        | null        | hypothetical protein CNAG_04537                                                                 | 1        | 1        | 1        | 3         |
| CNAG_04538        | chr9        | 1117620        | 1120096        | 2476        | null        | ubiquitin-like modifier-activating enzyme ATG7                                                  | 0        | 0        | 1        | 1         |
| CNAG_04541        | chr9        | 1123822        | 1125901        | 2079        | null        | cleavage stimulation factor subunit 2                                                           | 0        | 1        | 1        | 2         |
| CNAG_07780        | chr9        | 1133103        | 1134516        | 1413        | null        | geranylgeranyl diphosphate synthase, type III                                                   | 0        | 1        | 0        | 1         |
| CNAG_07781        | chr9        | 1134904        | 1141509        | 6605        | null        | ATP-dependent bile acid transporter                                                             | 1        | 0        | 0        | 1         |
| CNAG_07020        | chr9        | 1142403        | 1144112        | 1709        | null        | hypothetical protein CNAG_07020                                                                 | 1        | 0        | 0        | 1         |

Genes with more than 20 variants are indicated in bold
