# Supplementary material for: Identification of Pathogen Genomic Differences That Impact Human Immune Response and Disease during Cryptococcus neoformans Infection
Source: PubMed Central journal article supplement (PMC6635531; doi:10.1128/mbio.01440-19), 2019-07-16
Supplement: mBio.01440-19-st002.pdf [file mBio.01440-19-st002.pdf]

**TableS2. ST93A and ST93B clade-specific variants**

| CHROM | POS     | REF | ALT | gene       | effect        | impact   | class    | aaChange | clade | alias | description                                                       |
|-------|---------|-----|-----|------------|---------------|----------|----------|----------|-------|-------|-------------------------------------------------------------------|
| 1     | 944973  | G   | C   | CNAG_00372 | nonsynonymous | MODERATE | MISSENSE | A672G    | A     | null  | chromatin structure-remodeling complex protein RSC7               |
| 1     | 1583615 | C   | T   | CNAG_00619 | nonsynonymous | MODERATE | MISSENSE | A223T    | A     | null  | tubulin folding cofactor C                                        |
| 2     | 150696  | T   | C   | CNAG_06749 | nonsynonymous | MODERATE | MISSENSE | I14T     | A     | null  | hypothetical protein                                              |
| 2     | 774357  | A   | C   | CNAG_03772 | nonsynonymous | MODERATE | MISSENSE | C126G    | A     | HXS1  | high-affinity glucose transporter (HXS1)                          |
| 3     | 1180025 | C   | T   | CNAG_07552 | nonsynonymous | MODERATE | MISSENSE | A256V    | A     | null  | DNA repair protein Rad8                                           |
| 4     | 577501  | G   | A   | CNAG_05155 | nonsynonymous | MODERATE | MISSENSE | A539V    | A     | PTP2  | protein tyrosine phosphatase (PTP2)                               |
| 6     | 239210  | G   | A   | CNAG_02468 | nonsynonymous | MODERATE | MISSENSE | S545F    | A     | null  | AP-3 complex subunit delta-1                                      |
| 6     | 602467  | C   | G   | CNAG_02327 | nonsynonymous | MODERATE | MISSENSE | A113P    | A     | null  | xaa-Pro dipeptidase                                               |
| 6     | 1167676 | C   | G   | CNAG_02108 | nonsynonymous | MODERATE | MISSENSE | A19G     | A     | null  | GTPase activating protein                                         |
| 7     | 230511  | A   | G   | CNAG_06597 | nonsynonymous | MODERATE | MISSENSE | Q479R    | A     | SPT8  | predicted saga histone acetyltransferase complex component (SPT8) |
| 7     | 1191543 | C   | T   | CNAG_05910 | nonsynonymous | MODERATE | MISSENSE | G515S    | A     | null  | hypothetical protein                                              |
| 8     | 294928  | T   | A   | CNAG_03189 | nonsynonymous | MODERATE | MISSENSE | R793S    | A     | null  | DIL and ankyrin domain-containing protein                         |
| 8     | 1083181 | T   | C   | CNAG_03484 | nonsynonymous | MODERATE | MISSENSE | S555P    | A     | null  | kinetochore protein Mis13/DSN1                                    |
| 8     | 1256218 | AC  | A   | CNAG_03551 | indel         | HIGH     | NONE     | V58      | A     | null  | hypothetical protein                                              |
| 9     | 534468  | C   | T   | CNAG_04311 | nonsynonymous | MODERATE | MISSENSE | A184V    | A     | null  | charged multivesicular body protein 7                             |
| 11    | 153063  | A   | G   | CNAG_01512 | nonsynonymous | LOW      | NONE     | NA       | A     | null  | hypothetical protein                                              |
| 11    | 433361  | G   | A   | CNAG_01616 | nonsynonymous | MODERATE | MISSENSE | T835I    | A     | null  | hypothetical protein                                              |
| 11    | 621705  | A   | C   | CNAG_01690 | nonsynonymous | MODERATE | MISSENSE | N518T    | A     | null  | MFS transporter                                                   |
| 11    | 674162  | C   | A   | CNAG_01708 | nonsynonymous | MODERATE | MISSENSE | L636I    | A     | null  | hypothetical protein                                              |
| 13    | 111766  | G   | A   | CNAG_06292 | nonsynonymous | MODERATE | MISSENSE | L476F    | A     | null  | sugar transporter                                                 |
| 13    | 748576  | C   | G   | CNAG_07041 | nonsynonymous | MODERATE | MISSENSE | P115A    | A     | null  | hypothetical protein                                              |
| 14    | 23327   | C   | T   | CNAG_05341 | nonsynonymous | LOW      | NONE     | NA       | A     | null  | hypothetical protein                                              |
| 3     | 401715  | C   | T   | CNAG_02936 | nonsynonymous | MODERATE | MISSENSE | S437L    | B     | null  | CCR4-NOT transcription complex subunit 1                          |
| 9     | 272607  | G   | A   | CNAG_04199 | nonsynonymous | MODERATE | MISSENSE | V83M     | B     | null  | hypothetical protein                                              |
| 9     | 491535  | G   | A   | CNAG_04289 | nonsynonymous | MODERATE | MISSENSE | P285L    | B     | null  | hypothetical protein                                              |
| 11    | 236388  | G   | A   | CNAG_01539 | nonsynonymous | MODERATE | MISSENSE | R141C    | B     | null  | myo-inositol-1-phosphate synthase                                 |
| 14    | 68046   | G   | A   | CNAG_05352 | nonsynonymous | MODERATE | MISSENSE | A376T    | B     | null  | hypothetical protein                                              |
| 14    | 271762  | C   | T   | CNAG_05422 | nonsynonymous | MODERATE | MISSENSE | S737N    | B     | LIV11 | virulence related protein of unknown function (LIV11)             |
