# Supplementary material for: Identification of Pathogen Genomic Differences That Impact Human Immune Response and Disease during Cryptococcus neoformans Infection
Source: PubMed Central journal article supplement (PMC6635531; doi:10.1128/mbio.01440-19), 2019-07-16
Supplement: mBio.01440-19-st003.pdf [file mBio.01440-19-st003.pdf]

**Table S3. Statistical analysis of ST93 Clade-specific associations with quantitative infection phenotypes**

| <b>phenotype</b>   | <b>W</b> | <b>A strains mean - B strains mean</b> | <b>pvalue</b> | <b>significant</b> |
|--------------------|----------|----------------------------------------|---------------|--------------------|
| IL1b               | 142.5    | 0.23                                   | 0.582         |                    |
| IL2                | 66.5     | -1.62                                  | 0.022         | *                  |
| IL4                | 119.5    | -0.17                                  | 0.777         |                    |
| IL5                | 137      | 0.4                                    | 0.733         |                    |
| IL6                | 131      | 0.09                                   | 0.911         |                    |
| IL7                | 146.5    | -0.14                                  | 0.485         |                    |
| IL8                | 116      | -0.27                                  | 0.682         |                    |
| IL10               | 147      | 0.29                                   | 0.478         |                    |
| IL12               | 127      | -0.18                                  | 1             |                    |
| IL13               | 154.5    | 1                                      | 0.317         |                    |
| IL17               | 116.5    | -0.51                                  | 0.692         |                    |
| GCSF               | 151      | 0.43                                   | 0.39          |                    |
| GMCSF              | 95       | -0.21                                  | 0.23          |                    |
| IFNg               | 124.5    | -0.18                                  | 0.925         |                    |
| MCP1               | 107      | -0.57                                  | 0.455         |                    |
| MIP1b              | 119      | -0.17                                  | 0.766         |                    |
| TNFa               | 129.5    | -0.06                                  | 0.955         |                    |
| VEGF               | 38       | -0.82                                  | 0.393         |                    |
| LFA_Titer          | 77       | -1300                                  | 0.347         |                    |
| Protein            | 131      | 29.17                                  | 0.27          |                    |
| Survival_from_CM   | 197      | 92.09                                  | 0.14          |                    |
| hivrna_002         | 167.5    | 54728.58                               | 0.619         |                    |
| cd4_002            | 101      | -7.48                                  | 0.094         |                    |
| csf_wbc_a00        | 152      | 43.95                                  | 0.316         |                    |
| csf_wbc_000        | 152      | 43.95                                  | 0.316         |                    |
| uptake             | 226      | 0.27                                   | 0.011         | *                  |
| adherence          | 154      | 0.03                                   | 0.908         |                    |
| chitin             | 166      | -37.04                                 | 0.43          |                    |
| Absolute.Growth    | 195.5    | 0.03                                   | 0.078         |                    |
| Fluconazole.MIC    | 169.5    | 3.37                                   | 0.379         |                    |
| Amphotericin.B.MIC | 153      | 0.04                                   | 0.748         |                    |
| Sertraline.MIC     | 130.5    | -0.59                                  | 0.577         |                    |
