# Supplementary material for: Identification of Pathogen Genomic Differences That Impact Human Immune Response and Disease during Cryptococcus neoformans Infection
Source: PubMed Central journal article supplement (PMC6635531; doi:10.1128/mbio.01440-19), 2019-07-16
Supplement: mBio.01440-19-st004.pdf [file mBio.01440-19-st004.pdf]

**Table S4:** Phenotypes measured from patients enrolled in the COAT trial (clinical and cytokines) and *in vitro*.

| <b>Class</b>    | <b>Phenotype</b>              | <b>Lines with data missing</b>                                                 |
|-----------------|-------------------------------|--------------------------------------------------------------------------------|
| Clinical        | LFA titer                     | UgCI390, UgCI447, UgCI450, UgCI461, UgCI462, UgCI466, UgCI468, UgCI495 UgCI541 |
| Clinical        | protein                       | UgCI447, UgCI450, UgCI461, UgCI462, UgCI466, UgCI468, UgCI495 UgCI541          |
| Clinical        | HIV-viral                     | UgCI360, UgCI395, UgCI447, UgCI547                                             |
| Clinical        | EFA                           | UgCI332, UgCI447                                                               |
| Clinical        | CD4                           | UgCI447                                                                        |
| Clinical        | CSF WBC                       | UgCI360, UgCI395, UgCI447, UgCI547                                             |
| Clinical        | Survival                      | UgCI447                                                                        |
| Cytokines       | IL1-b                         | UgCI447, UgCI461, UgCI541                                                      |
| Cytokines       | IL2                           | UgCI447, UgCI461, UgCI541                                                      |
| Cytokines       | IL4                           | UgCI447, UgCI461, UgCI541                                                      |
| Cytokines       | IL-5                          | UgCI447, UgCI461, UgCI541                                                      |
| Cytokines       | IL-6                          | UgCI447, UgCI461, UgCI541                                                      |
| Cytokines       | IL-7                          | UgCI447, UgCI461, UgCI541                                                      |
| Cytokines       | IL-8                          | UgCI447, UgCI461, UgCI541                                                      |
| Cytokines       | IL-10                         | UgCI447, UgCI461, UgCI541                                                      |
| Cytokines       | IL-12                         | UgCI447, UgCI461, UgCI541                                                      |
| Cytokines       | IL-13                         | UgCI447, UgCI461, UgCI541                                                      |
| Cytokines       | IL-17                         | UgCI447, UgCI461, UgCI541                                                      |
| Cytokines       | GCSF                          | UgCI447, UgCI461, UgCI541                                                      |
| Cytokines       | GMCSF                         | UgCI447, UgCI461, UgCI541                                                      |
| Cytokines       | IFNg                          | UgCI447, UgCI461, UgCI541                                                      |
| Cytokines       | <b>MCP1</b>                   | UgCI447, UgCI461, UgCI541                                                      |
| Cytokines       | <b>TNF<math>\alpha</math></b> | UgCI447, UgCI461, UgCI541                                                      |
| Cytokines       | MIP1b                         | UgCI447, UgCI461, UgCI541                                                      |
| <i>in vitro</i> | uptake                        | UgCI212                                                                        |
| <i>in vitro</i> | adherence                     | UgCI212                                                                        |
| <i>in vitro</i> | chitin                        | UgCI212, UgCI549                                                               |
| <i>in vitro</i> | absolute growth               | UgCI357, UgCI422                                                               |
| <i>in vitro</i> | fluconazole MIC               | UgCI357, UgCI422                                                               |
| <i>in vitro</i> | amphoterecin B MIC            | UgCI357, UgCI422                                                               |
| <i>in vitro</i> | sertraline MIC                | UgCI357, UgCI422                                                               |
