# Supplementary material for: Identification of Pathogen Genomic Differences That Impact Human Immune Response and Disease during Cryptococcus neoformans Infection
Source: PubMed Central journal article supplement (PMC6635531; doi:10.1128/mbio.01440-19), 2019-07-16
Supplement: mBio.01440-19-st005.pdf [file mBio.01440-19-st005.pdf]

**Table S5. Significant variants in genes and hypothetical RNAs associated with quantitative infection phenotypes based on class designation**

| gene       | chr | pos     | class | effect      | pheno                              | numPhen | loc  |
|------------|-----|---------|-------|-------------|------------------------------------|---------|------|
| CNAG_00014 | 1   | 47564   | b     | ns          | GCSF                               | 1       | 740  |
| CNAG_00014 | 1   | 47575   | b     | ns          | GCSF                               | 1       | 751  |
| CNAG_00014 | 1   | 47671   | b     | ns          | GMCSF                              | 1       | 847  |
| CNAG_00363 | 1   | 927896  | b     | ns          | IL2                                | 1       | 4528 |
| CNAG_00363 | 1   | 927901  | b     | ns          | IL2                                | 1       | 4533 |
| CNAG_01241 | 5   | 836479  | b     | upstream    | IL2                                | 1       | 3092 |
| CNAG_01241 | 5   | 836697  | ab    | upstream    | IL4;IL5;IL7;IL17;GMCSF;TNFa;chitin | 7       | 3310 |
| CNAG_01241 | 5   | 836899  | ab    | upstream    | IL5;IL12;IL13;IL17;GCSF;TNFa       | 6       | 3512 |
| CNAG_01371 | 5   | 475470  | a     | UTR-5       | MCP1;hivrna                        | 2       | 322  |
| CNAG_01802 | 11  | 966644  | b     | upstream    | csf_wbc                            | 1       | 2357 |
| CNAG_01802 | 11  | 966669  | b     | upstream    | IL2                                | 1       | 2382 |
| CNAG_01802 | 11  | 966700  | b     | upstream    | IL7                                | 1       | 2413 |
| CNAG_02112 | 6   | 1160524 | b     | upstream    | AMP                                | 1       | 3788 |
| CNAG_02112 | 6   | 1160528 | b     | upstream    | AMP                                | 1       | 3792 |
| CNAG_02112 | 6   | 1160532 | b     | upstream    | AMP                                | 1       | 3796 |
| CNAG_02176 | 6   | 988843  | b     | ns          | MIP1b                              | 1       | 2018 |
| CNAG_02176 | 6   | 988922  | b     | ns          | LFA_Titer                          | 1       | 1939 |
| CNAG_02176 | 6   | 989188  | b     | ns          | IL12                               | 1       | 1673 |
| CNAG_02176 | 6   | 989334  | b     | ns          | AMP                                | 1       | 1527 |
| CNAG_02176 | 6   | 989732  | b     | ns          | IL2                                | 1       | 1129 |
| CNAG_02176 | 6   | 990777  | b     | STOP_GAINED | MIP1b                              | 1       | 84   |
| CNAG_02176 | 6   | 990885  | b     | start+      | SERT                               | 1       | -24  |
| CNAG_02176 | 6   | 988405  | ab    | UTR-3       | chitin;SERT                        | 2       | -92  |
| CNAG_02176 | 6   | 988733  | ab    | STOP_GAINED | IL1b;IL13;MCP1;MIP1b               | 4       | 2128 |
| CNAG_02176 | 6   | 989490  | ab    | ns          | hivrna;SERT                        | 2       | 1371 |
| CNAG_02176 | 6   | 990771  | ab    | ns          | IL10;MIP1b                         | 2       | 90   |
| CNAG_02176 | 6   | 990851  | ab    | ns          | IL10;MIP1b                         | 2       | 10   |
| CNAG_02176 | 6   | 991027  | ab    | UTR-5       | IL13;TNFa;Survival                 | 3       | 166  |
| CNAG_02177 | 6   | 990701  | a     | upstream    | IL1b;IL6;IL10                      | 3       | 3827 |
| CNAG_02475 | 6   | 221275  | b     | upstream    | growth                             | 1       | 1163 |
| CNAG_02475 | 6   | 221282  | b     | upstream    | growth                             | 1       | 1170 |
| CNAG_02475 | 6   | 221273  | ab    | upstream    | IL7;growth                         | 2       | 1161 |

|            |    |         |    |            |                              |   |      |
|------------|----|---------|----|------------|------------------------------|---|------|
| CNAG_02798 | 3  | 750294  | a  | upstream   | cd4;AMP                      | 2 | 3991 |
| CNAG_04100 | 9  | 7729    | b  | upstream   | growth                       | 1 | 3092 |
| CNAG_04100 | 9  | 5213    | ab | upstream   | adherence;FLC;SERT           | 3 | 576  |
| CNAG_04100 | 9  | 8171    | ab | upstream   | efa;SERT                     | 2 | 3534 |
| CNAG_04102 | 9  | 10033   | a  | UTR-3      | GMCSF;efa                    | 2 | -705 |
| CNAG_04179 | 9  | 220963  | a  | upstream   | efa;SERT                     | 2 | 3710 |
| CNAG_04373 | 9  | 706175  | b  | upstream   | Survival                     | 1 | 2598 |
| CNAG_04373 | 9  | 705343  | ab | upstream   | IL8;efa                      | 2 | 1766 |
| CNAG_04535 | 9  | 1115286 | a  | upstream   | IL17;GCSF;LFA_Titer;protein  | 4 | 3370 |
| CNAG_04922 | 10 | 18908   | b  | upstream   | IL2                          | 1 | 762  |
| CNAG_04922 | 10 | 18915   | b  | upstream   | IL2                          | 1 | 769  |
| CNAG_04922 | 10 | 18933   | b  | upstream   | IL2                          | 1 | 787  |
| CNAG_04922 | 10 | 18941   | b  | upstream   | IL2                          | 1 | 795  |
| CNAG_04922 | 10 | 18988   | b  | upstream   | adherence                    | 1 | 842  |
| CNAG_04922 | 10 | 18992   | b  | upstream   | adherence                    | 1 | 846  |
| CNAG_04922 | 10 | 18997   | b  | upstream   | adherence                    | 1 | 851  |
| CNAG_05185 | 4  | 667446  | b  | UTR-5      | uptake                       | 1 | 280  |
| CNAG_05185 | 4  | 667433  | ab | UTR-5      | Survival;uptake              | 2 | 267  |
| CNAG_05450 | 14 | 342562  | a  | ns         | IL6;IL7;IL12;IL13;GCSF;MIP1b | 6 | 1998 |
| CNAG_05661 | 14 | 909638  | b  | upstream   | adherence                    | 1 | 4406 |
| CNAG_05661 | 14 | 910152  | b  | upstream   | uptake                       | 1 | 4920 |
| CNAG_05661 | 14 | 908850  | ab | upstream   | IL8;GMCSF;IFNg;MCP1          | 4 | 3618 |
| CNAG_05661 | 14 | 909011  | ab | upstream   | IL1b;IL8;MIP1b;uptake;FLC    | 5 | 3779 |
| CNAG_05661 | 14 | 910181  | ab | upstream   | IL1b;IL6;IFNg;hivrna         | 4 | 4949 |
| CNAG_05661 | 14 | 908994  | ab | upstream   | uptake;FLC                   | 2 | 3762 |
| CNAG_05662 | 14 | 910742  | b  | UTR-3      | AMP                          | 1 | -141 |
| CNAG_05662 | 14 | 910834  | b  | downstream | Survival                     | 1 | -233 |
| CNAG_05662 | 14 | 910926  | b  | downstream | SERT                         | 1 | -325 |
| CNAG_05662 | 14 | 910966  | b  | downstream | Survival                     | 1 | -365 |
| CNAG_05662 | 14 | 911262  | b  | downstream | MCP1                         | 1 | -661 |
| CNAG_05662 | 14 | 911292  | b  | downstream | IL2                          | 1 | -691 |
| CNAG_05662 | 14 | 911308  | b  | downstream | adherence                    | 1 | -707 |
| CNAG_05662 | 14 | 911321  | b  | downstream | IL5                          | 1 | -720 |
| CNAG_05662 | 14 | 911352  | b  | downstream | MCP1                         | 1 | -751 |

|            |    |         |    |                                  |                                               |   |       |
|------------|----|---------|----|----------------------------------|-----------------------------------------------|---|-------|
| CNAG_05662 | 14 | 910822  | ab | downstream                       | Survival;FLC                                  | 2 | -221  |
| CNAG_05662 | 14 | 910939  | ab | downstream                       | growth;SERT                                   | 2 | -338  |
| CNAG_05662 | 14 | 910964  | ab | downstream                       | Survival;AMP                                  | 2 | -363  |
| CNAG_05662 | 14 | 910979  | ab | downstream                       | Survival;uptake                               | 2 | -378  |
| CNAG_05662 | 14 | 911099  | ab | downstream                       | IL12;GMCSF;MCP1;TNFa;growth                   | 5 | -498  |
| CNAG_05662 | 14 | 911129  | ab | downstream                       | IL12;IL13;IL17;MIP1b;TNFa;growth;FLC;AMP;SERT | 9 | -528  |
| CNAG_05662 | 14 | 911206  | ab | downstream                       | IL8;MCP1;MIP1b                                | 3 | -605  |
| CNAG_05663 | 14 | 910323  | b  | downstream                       | TNFa                                          | 1 | -1905 |
| CNAG_05663 | 14 | 910555  | b  | downstream                       | Survival                                      | 1 | -1673 |
| CNAG_05663 | 14 | 910328  | ab | downstream                       | IL1b;IL13;TNFa                                | 3 | -1900 |
| CNAG_05913 | 7  | 1205599 | ab | upstream                         | MIP1b;adherence                               | 2 | 2952  |
| CNAG_05913 | 7  | 1205600 | ab | upstream                         | IL13;IL17;MIP1b;adherence                     | 4 | 2953  |
| CNAG_05937 | 7  | 1263610 | a  | UTR-5                            | uptake;SERT                                   | 2 | 10    |
| CNAG_05937 | 7  | 1263646 | b  | UTR-5                            | SERT                                          | 1 | 46    |
| CNAG_05937 | 7  | 1263647 | b  | UTR-5                            | SERT                                          | 1 | 47    |
| CNAG_05987 | 12 | 14009   | b  | ns                               | IL2                                           | 1 | 990   |
| CNAG_05987 | 12 | 14035   | b  | ns                               | IL2                                           | 1 | 964   |
| CNAG_05987 | 12 | 15014   | b  | UTR-5                            | adherence                                     | 1 | 15    |
| CNAG_05987 | 12 | 14197   | ab | ns                               | efa;adherence                                 | 2 | 802   |
| CNAG_05987 | 12 | 14202   | ab | frameshift                       | efa;adherence                                 | 2 | 797   |
| CNAG_05987 | 12 | 14125   | b  | CODON_CHANGE_PLUS_CODON_DELETION | chitin                                        | 1 | 874   |
| CNAG_06169 | 12 | 502808  | b  | UTR-3                            | IL8                                           | 1 | -1164 |
| CNAG_06169 | 12 | 503311  | b  | UTR-3                            | GCSF                                          | 1 | -661  |
| CNAG_06169 | 12 | 502888  | ab | UTR-3                            | GMCSF;growth                                  | 2 | -1084 |
| CNAG_06169 | 12 | 502890  | ab | UTR-3                            | IL6;IL8;GMCSF                                 | 3 | -1082 |
| CNAG_06169 | 12 | 503049  | ab | UTR-3                            | GMCSF;hivrna                                  | 2 | -923  |
| CNAG_06169 | 12 | 503112  | ab | UTR-3                            | hivrna;csf_wbc                                | 2 | -860  |
| CNAG_06169 | 12 | 503313  | ab | UTR-3                            | IL12;IL13;GCSF                                | 3 | -659  |
| CNAG_06169 | 12 | 503321  | ab | UTR-3                            | IL12;IL13;GCSF;MIP1b                          | 4 | -651  |
| CNAG_06169 | 12 | 503327  | ab | UTR-3                            | IL12;IL13;MIP1b                               | 3 | -645  |
| CNAG_06169 | 12 | 503401  | ab | UTR-3                            | IL10;chitin                                   | 2 | -571  |
| CNAG_06256 | 13 | 11130   | b  | upstream                         | TNFa                                          | 1 | 4551  |
| CNAG_06256 | 13 | 11118   | ab | upstream                         | IFNg;TNFa                                     | 2 | 4539  |
| CNAG_06332 | 13 | 219311  | b  | upstream                         | efa                                           | 1 | 2073  |

|            |    |         |    |                 |                         |   |      |
|------------|----|---------|----|-----------------|-------------------------|---|------|
| CNAG_06332 | 13 | 219312  | b  | upstream        | efa                     | 1 | 2074 |
| CNAG_06332 | 13 | 219021  | b  | upstream        | adherence               | 1 | 1783 |
| CNAG_06422 | 13 | 436551  | b  | UTR-5           | IL2                     | 1 | 58   |
| CNAG_06422 | 13 | 436554  | b  | UTR-5           | IL2                     | 1 | 55   |
| CNAG_06490 | 13 | 655915  | a  | frameshift      | hivrna;cd4              | 2 | 2826 |
| CNAG_06525 | 7  | 11056   | ab | ns              | IL5;IL10                | 2 | 417  |
| CNAG_06525 | 7  | 14006   | ab | upstream        | IL6;IL8                 | 2 | 2533 |
| CNAG_06574 | 7  | 164473  | b  | upstream        | hivrna                  | 1 | 615  |
| CNAG_06574 | 7  | 165027  | b  | upstream        | MIP1b                   | 1 | 1169 |
| CNAG_06574 | 7  | 165873  | b  | upstream        | IL13                    | 1 | 2015 |
| CNAG_06574 | 7  | 166309  | b  | upstream        | growth                  | 1 | 2451 |
| CNAG_06574 | 7  | 167135  | b  | upstream        | IL13                    | 1 | 3277 |
| CNAG_06574 | 7  | 167224  | b  | upstream        | GMCSF                   | 1 | 3366 |
| CNAG_06574 | 7  | 164887  | ab | upstream        | IL2;TNFa                | 2 | 1029 |
| CNAG_06574 | 7  | 164926  | ab | upstream        | IL2;MIP1b               | 2 | 1068 |
| CNAG_06574 | 7  | 165704  | ab | upstream        | Survival;efa            | 2 | 1846 |
| CNAG_06574 | 7  | 167292  | ab | upstream        | IL1b;GCSF;MIP1b;uptake  | 4 | 3434 |
| CNAG_06574 | 7  | 167370  | ab | upstream        | cd4;uptake              | 2 | 3512 |
| CNAG_06704 | 2  | 270700  | a  | upstream        | IL2;protein             | 2 | 3904 |
| CNAG_06876 | 5  | 7093    | a  | UTR-3           | IFNg;MIP1b;TNFa         | 3 | -192 |
| CNAG_06968 | 8  | 1383765 | a  | CODON_INSERTION | IL12;IL17               | 2 | 236  |
| CNAG_07026 | 12 | 11092   | ab | upstream        | IL1b;IL13;Survival;efa  | 4 | 2904 |
| CNAG_07026 | 12 | 11094   | ab | upstream        | IL13;LFA_Titer;Survival | 3 | 2906 |
| CNAG_07026 | 12 | 11400   | ab | upstream        | IL1b;IL7;IL13;LFA_Titer | 4 | 3212 |
| CNAG_07026 | 12 | 11406   | ab | upstream        | IL1b;IL7;IL13;LFA_Titer | 4 | 3218 |
| CNAG_07026 | 12 | 11407   | ab | upstream        | IL1b;IL7;IL13;LFA_Titer | 4 | 3219 |
| CNAG_07026 | 12 | 11410   | ab | upstream        | IL1b;IL7;IL13;LFA_Titer | 4 | 3222 |
| CNAG_07026 | 12 | 11413   | ab | upstream        | IL1b;LFA_Titer          | 2 | 3225 |
| CNAG_07703 | 7  | 1341024 | a  | ns              | IL6;IL8                 | 2 | 521  |
| CNAG_07837 | 10 | 13558   | b  | UTR-5           | IL2                     | 1 | 129  |
| CNAG_07837 | 10 | 15302   | b  | UTR-3           | cd4                     | 1 | -526 |
| CNAG_07837 | 10 | 15288   | b  | UTR-3           | csf_wbc                 | 1 | -512 |
| CNAG_07950 | 1  | 975397  | b  | upstream        | efa                     | 1 | 1550 |
| CNAG_07950 | 1  | 975152  | ab | upstream        | IL8;hivrna              | 2 | 1795 |

|            |    |        |    |          |                                         |   |      |
|------------|----|--------|----|----------|-----------------------------------------|---|------|
| CNAG_07950 | 1  | 975212 | ab | upstream | IL4;IL6;IL8;GMCSF;IFNg;FLC              | 6 | 1735 |
| CNAG_08006 | 11 | 804710 | ab | UTR-5    | IL4;IL5;IL6;MIP1b;TNFa;adherence;chitin | 7 | 164  |
| CNAG_08006 | 11 | 804742 | ab | UTR-5    | IL4;IFNg;MCP1;adherence                 | 4 | 132  |
| CNAG_12610 | 7  | 49744  | a  | upstream | MCP1;uptake                             | 2 | 4416 |
| CNAG_13108 | 13 | 128625 | ab | upstream | IL13;GCSF                               | 2 | 339  |
| CNAG_13108 | 13 | 128715 | ab | upstream | IL13;GCSF                               | 2 | 249  |
| CNAG_13108 | 13 | 128729 | ab | upstream | IL13;GCSF                               | 2 | 235  |
| CNAG_13204 | 14 | 924025 | b  | upstream | GMCSF                                   | 1 | 4660 |
| CNAG_13204 | 14 | 924047 | b  | upstream | IL13                                    | 1 | 4682 |
| CNAG_13204 | 14 | 924049 | b  | upstream | IL13                                    | 1 | 4684 |
| CNAG_13204 | 14 | 924050 | b  | upstream | IL13                                    | 1 | 4685 |
