# Supplementary material for: Identification of Pathogen Genomic Differences That Impact Human Immune Response and Disease during Cryptococcus neoformans Infection
Source: PubMed Central journal article supplement (PMC6635531; doi:10.1128/mbio.01440-19), 2019-07-16
Supplement: mBio.01440-19-st006.pdf [file mBio.01440-19-st006.pdf]

**Table S6. Logistic regression analysis of all significant variants in genes and hypothetical RNAs associated with quantitative infection phenotypes**

| gene       | chr | pos     | class | effect      | pheno     | odds ratio (CI)        | logistic regression                             |
|------------|-----|---------|-------|-------------|-----------|------------------------|-------------------------------------------------|
| CNAG_00014 | 1   | 47564   | b     | ns          | GCSF      | 0.22 (0.05,0.97)       | est = -1.53, error = 0.76, z = -2, p = 0.045    |
| CNAG_00014 | 1   | 47575   | b     | ns          | GCSF      | 0.2 (0.04,0.91)        | est = -1.62, error = 0.78, z = -2.08, p = 0.038 |
| CNAG_00014 | 1   | 47671   | b     | ns          | GMCSF     | 3.17 (1.21,8.32)       | est = 1.15, error = 0.49, z = 2.35, p = 0.019   |
| CNAG_00363 | 1   | 927896  | b     | ns          | IL2       | 1.78 (1.04,3.04)       | est = 0.57, error = 0.27, z = 2.09, p = 0.036   |
| CNAG_00363 | 1   | 927901  | b     | ns          | IL2       | 1.78 (1.04,3.04)       | est = 0.57, error = 0.27, z = 2.09, p = 0.036   |
| CNAG_01241 | 5   | 836479  | b     | upstream    | IL2       | 1.97 (1.15,3.37)       | est = 0.68, error = 0.28, z = 2.46, p = 0.014   |
| CNAG_01241 | 5   | 836697  | ab    | upstream    | IL4       | 1.93 (1.03,3.62)       | est = 0.66, error = 0.32, z = 2.06, p = 0.039   |
| CNAG_01241 | 5   | 836697  | ab    | upstream    | IL5       | 2.81 (1.27,6.2)        | est = 1.03, error = 0.4, z = 2.55, p = 0.011    |
| CNAG_01241 | 5   | 836697  | ab    | upstream    | IL7       | 3.05 (1.08,8.64)       | est = 1.11, error = 0.53, z = 2.1, p = 0.036    |
| CNAG_01241 | 5   | 836697  | ab    | upstream    | IL17      | 2.11 (1.01,4.41)       | est = 0.75, error = 0.38, z = 1.99, p = 0.047   |
| CNAG_01241 | 5   | 836697  | ab    | upstream    | GMCSF     | 3.18 (1.26,8.02)       | est = 1.16, error = 0.47, z = 2.45, p = 0.014   |
| CNAG_01241 | 5   | 836697  | ab    | upstream    | TNFa      | 2.3 (1.16,4.56)        | est = 0.83, error = 0.35, z = 2.4, p = 0.017    |
| CNAG_01241 | 5   | 836697  | ab    | upstream    | chitin    | 1.0009 (1.0001,1.0017) | est = 0, error = 0, z = 2.14, p = 0.032         |
| CNAG_01241 | 5   | 836899  | ab    | upstream    | IL5       | 0.17 (0.03,0.88)       | est = -1.74, error = 0.82, z = -2.11, p = 0.035 |
| CNAG_01241 | 5   | 836899  | ab    | upstream    | IL12      | 0.3 (0.11,0.81)        | est = -1.21, error = 0.51, z = -2.38, p = 0.017 |
| CNAG_01241 | 5   | 836899  | ab    | upstream    | IL13      | 0.38 (0.16,0.9)        | est = -0.96, error = 0.44, z = -2.19, p = 0.028 |
| CNAG_01241 | 5   | 836899  | ab    | upstream    | IL17      | 0.45 (0.23,0.9)        | est = -0.79, error = 0.35, z = -2.25, p = 0.025 |
| CNAG_01241 | 5   | 836899  | ab    | upstream    | GCSF      | 12.58 (1.38,114.77)    | est = 2.53, error = 1.13, z = 2.24, p = 0.025   |
| CNAG_01241 | 5   | 836899  | ab    | upstream    | TNFa      | 0.34 (0.14,0.81)       | est = -1.08, error = 0.44, z = -2.43, p = 0.015 |
| CNAG_01371 | 5   | 475470  | a     | UTR-5       | MCP1      | 0.56 (0.34,0.91)       | est = -0.59, error = 0.25, z = -2.32, p = 0.02  |
| CNAG_01371 | 5   | 475470  | a     | UTR-5       | hivrna    | 1 (1,1)                | est = 0, error = 0, z = 2.25, p = 0.025         |
| CNAG_01802 | 11  | 966644  | b     | upstream    | csf_wbc   | 1.01 (1,1.03)          | est = 0.01, error = 0.01, z = 2.37, p = 0.018   |
| CNAG_01802 | 11  | 966669  | b     | upstream    | IL2       | 1.54 (1,2.36)          | est = 0.43, error = 0.22, z = 1.96, p = 0.05    |
| CNAG_01802 | 11  | 966700  | b     | upstream    | IL7       | 0.35 (0.13,0.98)       | est = -1.04, error = 0.52, z = -2, p = 0.045    |
| CNAG_02112 | 6   | 1160524 | b     | upstream    | AMP       | 12.99 (1.05,161.24)    | est = 2.56, error = 1.29, z = 1.99, p = 0.046   |
| CNAG_02112 | 6   | 1160528 | b     | upstream    | AMP       | 12.99 (1.05,161.24)    | est = 2.56, error = 1.29, z = 1.99, p = 0.046   |
| CNAG_02112 | 6   | 1160532 | b     | upstream    | AMP       | 12.99 (1.05,161.24)    | est = 2.56, error = 1.29, z = 1.99, p = 0.046   |
| CNAG_02176 | 6   | 988843  | b     | ns          | MIP1b     | 0.45 (0.22,0.92)       | est = -0.79, error = 0.36, z = -2.18, p = 0.029 |
| CNAG_02176 | 6   | 988922  | b     | ns          | LFA_Titer | 0.4 (0.16,0.97)        | est = -0.92, error = 0.45, z = -2.02, p = 0.043 |
| CNAG_02176 | 6   | 989188  | b     | ns          | IL12      | 1.75 (1,3.06)          | est = 0.56, error = 0.29, z = 1.97, p = 0.049   |
| CNAG_02176 | 6   | 989334  | b     | ns          | AMP       | NA                     | est = -3.16, error = 1.58, z = -2, p = 0.045    |
| CNAG_02176 | 6   | 989732  | b     | ns          | IL2       | 1.53 (1.01,2.34)       | est = 0.43, error = 0.21, z = 2, p = 0.046      |
| CNAG_02176 | 6   | 990777  | b     | STOP_GAINED | MIP1b     | 0.48 (0.24,0.97)       | est = -0.73, error = 0.36, z = -2.04, p = 0.041 |
| CNAG_02176 | 6   | 990885  | b     | start+      | SERT      | NA                     | est = -0.31, error = 0.15, z = -2.04, p = 0.042 |
| CNAG_02176 | 6   | 988405  | ab    | UTR-3       | chitin    | NA                     | est = 0, error = 0, z = -1.99, p = 0.047        |
| CNAG_02176 | 6   | 988405  | ab    | UTR-3       | SERT      | NA                     | est = -0.29, error = 0.15, z = -2, p = 0.046    |
| CNAG_02176 | 6   | 988733  | ab    | STOP_GAINED | IL1b      | 0.41 (0.18,0.93)       | est = -0.88, error = 0.41, z = -2.13, p = 0.033 |
| CNAG_02176 | 6   | 988733  | ab    | STOP_GAINED | IL13      | 0.76 (0.59,0.98)       | est = -0.27, error = 0.13, z = -2.08, p = 0.038 |
| CNAG_02176 | 6   | 988733  | ab    | STOP_GAINED | MCP1      | 0.6 (0.39,0.92)        | est = -0.51, error = 0.22, z = -2.34, p = 0.019 |
| CNAG_02176 | 6   | 988733  | ab    | STOP_GAINED | MIP1b     | 0.27 (0.11,0.7)        | est = -1.3, error = 0.48, z = -2.69, p = 0.007  |
| CNAG_02176 | 6   | 989490  | ab    | ns          | hivrna    | 1 (1,1)                | est = 0, error = 0, z = -2.15, p = 0.032        |
| CNAG_02176 | 6   | 989490  | ab    | ns          | SERT      | NA                     | est = -0.41, error = 0.19, z = -2.21, p = 0.027 |
| CNAG_02176 | 6   | 990771  | ab    | ns          | IL10      | 0.39 (0.16,0.97)       | est = -0.95, error = 0.47, z = -2.03, p = 0.042 |

|            |    |         |    |          |           |                                                      |                                                  |
|------------|----|---------|----|----------|-----------|------------------------------------------------------|--------------------------------------------------|
| CNAG_02176 | 6  | 990771  | ab | ns       | MIP1b     | 0.49 (0.24,0.98)                                     | est = -0.72, error = 0.36, z = -2, p = 0.045     |
| CNAG_02176 | 6  | 990851  | ab | ns       | IL10      | 0.39 (0.15,1)                                        | est = -0.95, error = 0.48, z = -1.97, p = 0.049  |
| CNAG_02176 | 6  | 990851  | ab | ns       | MIP1b     | 0.45 (0.22,0.92)                                     | est = -0.81, error = 0.37, z = -2.18, p = 0.029  |
| CNAG_02176 | 6  | 991027  | ab | UTR-5    | IL13      | 0.69 (0.48,0.97)                                     | est = -0.38, error = 0.18, z = -2.11, p = 0.034  |
| CNAG_02176 | 6  | 991027  | ab | UTR-5    | TNFa      | 0.5 (0.26,0.98)                                      | est = -0.68, error = 0.34, z = -2.03, p = 0.042  |
| CNAG_02176 | 6  | 991027  | ab | UTR-5    | Survival  | 0.991 (0.9841,0.9978)                                | est = -0.01, error = 0, z = -2.58, p = 0.01      |
| CNAG_02177 | 6  | 990701  | a  | upstream | IL1b      | 0.36 (0.15,0.87)                                     | est = -1.03, error = 0.46, z = -2.26, p = 0.024  |
| CNAG_02177 | 6  | 990701  | a  | upstream | IL6       | 0.69 (0.5,0.95)                                      | est = -0.37, error = 0.16, z = -2.3, p = 0.021   |
| CNAG_02177 | 6  | 990701  | a  | upstream | IL10      | 0.28 (0.11,0.76)                                     | est = -1.26, error = 0.5, z = -2.49, p = 0.013   |
| CNAG_02475 | 6  | 221275  | b  | upstream | growth    | 9270592642782.33 (874.43,98286070453695393300480)    | est = 29.86, error = 11.78, z = 2.54, p = 0.011  |
| CNAG_02475 | 6  | 221282  | b  | upstream | growth    | 695429.76 (1.9,255059140770.7)                       | est = 13.45, error = 6.54, z = 2.06, p = 0.04    |
| CNAG_02475 | 6  | 221273  | ab | upstream | IL7       | 2.93 (1.03,8.3)                                      | est = 1.07, error = 0.53, z = 2.02, p = 0.043    |
| CNAG_02475 | 6  | 221273  | ab | upstream | growth    | 2488091875835.39 (290.99,21274349201601838710784)    | est = 28.54, error = 11.67, z = 2.45, p = 0.014  |
| CNAG_02798 | 3  | 750294  | a  | upstream | cd4       | 1.03 (1,1.06)                                        | est = 0.03, error = 0.01, z = 2.03, p = 0.042    |
| CNAG_02798 | 3  | 750294  | a  | upstream | AMP       | NA                                                   | est = -3.44, error = 1.74, z = -1.98, p = 0.048  |
| CNAG_04100 | 9  | 7729    | b  | upstream | growth    | 62151.83 (1.37,2829792631.21)                        | est = 11.04, error = 5.47, z = 2.02, p = 0.044   |
| CNAG_04100 | 9  | 5213    | ab | upstream | adherence | 90.72 (1.29,6383.5)                                  | est = 4.51, error = 2.17, z = 2.08, p = 0.038    |
| CNAG_04100 | 9  | 5213    | ab | upstream | FLC       | 1.05 (1,1.1)                                         | est = 0.05, error = 0.02, z = 2.05, p = 0.041    |
| CNAG_04100 | 9  | 5213    | ab | upstream | SERT      | NA                                                   | est = -0.41, error = 0.17, z = -2.39, p = 0.017  |
| CNAG_04100 | 9  | 8171    | ab | upstream | efa       | 0 (0,0.28)                                           | est = -26.89, error = 13.08, z = -2.06, p = 0.04 |
| CNAG_04100 | 9  | 8171    | ab | upstream | SERT      | NA                                                   | est = -0.32, error = 0.16, z = -2.06, p = 0.04   |
| CNAG_04102 | 9  | 10033   | a  | UTR-3    | GMCSF     | 0.28 (0.09,0.87)                                     | est = -1.26, error = 0.57, z = -2.2, p = 0.028   |
| CNAG_04102 | 9  | 10033   | a  | UTR-3    | efa       | 0 (0,0.03)                                           | est = -35.91, error = 16.55, z = -2.17, p = 0.03 |
| CNAG_04373 | 9  | 706175  | b  | upstream | Survival  | 1.0064 (1.0015,1.0113)                               | est = 0.01, error = 0, z = 2.55, p = 0.011       |
| CNAG_04373 | 9  | 705343  | ab | upstream | IL8       | 1.97 (1.05,3.69)                                     | est = 0.68, error = 0.32, z = 2.11, p = 0.035    |
| CNAG_04373 | 9  | 705343  | ab | upstream | efa       | 614781858952922 (682.99,553385113861605342717149184) | est = 34.05, error = 14.04, z = 2.42, p = 0.015  |
| CNAG_04535 | 9  | 1115286 | a  | upstream | IL17      | 0.35 (0.15,0.85)                                     | est = -1.05, error = 0.45, z = -2.33, p = 0.02   |
| CNAG_04535 | 9  | 1115286 | a  | upstream | GCSF      | 5.34 (1.13,25.21)                                    | est = 1.67, error = 0.79, z = 2.11, p = 0.035    |
| CNAG_04535 | 9  | 1115286 | a  | upstream | LFA_Titer | 7.78 (1.01,60.03)                                    | est = 2.05, error = 1.04, z = 1.97, p = 0.049    |
| CNAG_04535 | 9  | 1115286 | a  | upstream | protein   | 0.9998 (0.9996,1)                                    | est = 0, error = 0, z = -2.01, p = 0.044         |
| CNAG_04922 | 10 | 18908   | b  | upstream | IL2       | 0.61 (0.4,0.95)                                      | est = -0.49, error = 0.22, z = -2.2, p = 0.028   |
| CNAG_04922 | 10 | 18915   | b  | upstream | IL2       | 0.61 (0.4,0.95)                                      | est = -0.49, error = 0.22, z = -2.2, p = 0.028   |
| CNAG_04922 | 10 | 18933   | b  | upstream | IL2       | 0.63 (0.41,0.97)                                     | est = -0.46, error = 0.22, z = -2.11, p = 0.035  |
| CNAG_04922 | 10 | 18941   | b  | upstream | IL2       | 0.63 (0.41,0.97)                                     | est = -0.46, error = 0.22, z = -2.09, p = 0.036  |
| CNAG_05185 | 4  | 667446  | b  | UTR-5    | uptake    | NA                                                   | est = -3.43, error = 1.49, z = -2.3, p = 0.021   |
| CNAG_05185 | 4  | 667433  | ab | UTR-5    | Survival  | 0.9946 (0.9899,0.9993)                               | est = -0.01, error = 0, z = -2.25, p = 0.024     |
| CNAG_05185 | 4  | 667433  | ab | UTR-5    | uptake    | NA                                                   | est = -3.76, error = 1.55, z = -2.42, p = 0.016  |
| CNAG_05450 | 14 | 342562  | a  | ns       | IL6       | 0.75 (0.56,0.99)                                     | est = -0.29, error = 0.15, z = -2, p = 0.046     |
| CNAG_05450 | 14 | 342562  | a  | ns       | IL7       | 0.32 (0.11,0.91)                                     | est = -1.15, error = 0.54, z = -2.14, p = 0.032  |
| CNAG_05450 | 14 | 342562  | a  | ns       | IL12      | 0.53 (0.3,0.94)                                      | est = -0.63, error = 0.29, z = -2.19, p = 0.028  |
| CNAG_05450 | 14 | 342562  | a  | ns       | IL13      | 0.74 (0.57,0.96)                                     | est = -0.3, error = 0.13, z = -2.28, p = 0.023   |
| CNAG_05450 | 14 | 342562  | a  | ns       | GCSF      | 12.55 (1.94,81.35)                                   | est = 2.53, error = 0.95, z = 2.65, p = 0.008    |
| CNAG_05450 | 14 | 342562  | a  | ns       | MIP1b     | 0.31 (0.13,0.75)                                     | est = -1.17, error = 0.45, z = -2.58, p = 0.01   |
| CNAG_05661 | 14 | 909638  | b  | upstream | adherence | 87.56 (1.76,4353.6)                                  | est = 4.47, error = 1.99, z = 2.24, p = 0.025    |
| CNAG_05661 | 14 | 910152  | b  | upstream | uptake    | NA                                                   | est = -3.29, error = 1.51, z = -2.17, p = 0.03   |

|            |    |        |    |            |           |                                       |                                                 |
|------------|----|--------|----|------------|-----------|---------------------------------------|-------------------------------------------------|
| CNAG_05661 | 14 | 908850 | ab | upstream   | IL8       | 0.54 (0.3,0.97)                       | est = -0.62, error = 0.3, z = -2.06, p = 0.039  |
| CNAG_05661 | 14 | 908850 | ab | upstream   | GMCSF     | 0.39 (0.17,0.89)                      | est = -0.95, error = 0.42, z = -2.25, p = 0.024 |
| CNAG_05661 | 14 | 908850 | ab | upstream   | IFNg      | 0.61 (0.37,0.98)                      | est = -0.5, error = 0.24, z = -2.05, p = 0.041  |
| CNAG_05661 | 14 | 908850 | ab | upstream   | MCP1      | 0.64 (0.43,0.95)                      | est = -0.44, error = 0.2, z = -2.2, p = 0.028   |
| CNAG_05661 | 14 | 909011 | ab | upstream   | IL1b      | 2.76 (1.06,7.22)                      | est = 1.02, error = 0.49, z = 2.08, p = 0.038   |
| CNAG_05661 | 14 | 909011 | ab | upstream   | IL8       | 2.43 (1.05,5.63)                      | est = 0.89, error = 0.43, z = 2.07, p = 0.038   |
| CNAG_05661 | 14 | 909011 | ab | upstream   | MIP1b     | 5.04 (1.16,21.9)                      | est = 1.62, error = 0.75, z = 2.16, p = 0.031   |
| CNAG_05661 | 14 | 909011 | ab | upstream   | uptake    | 156.75 (1.71,14336.35)                | est = 5.05, error = 2.3, z = 2.19, p = 0.028    |
| CNAG_05661 | 14 | 909011 | ab | upstream   | FLC       | 1.05 (1,1.1)                          | est = 0.05, error = 0.02, z = 2.01, p = 0.045   |
| CNAG_05661 | 14 | 910181 | ab | upstream   | IL1b      | 0.42 (0.19,0.96)                      | est = -0.86, error = 0.42, z = -2.05, p = 0.04  |
| CNAG_05661 | 14 | 910181 | ab | upstream   | IL6       | 0.73 (0.54,0.99)                      | est = -0.32, error = 0.15, z = -2.05, p = 0.04  |
| CNAG_05661 | 14 | 910181 | ab | upstream   | IFNg      | 0.49 (0.26,0.93)                      | est = -0.72, error = 0.33, z = -2.19, p = 0.028 |
| CNAG_05661 | 14 | 910181 | ab | upstream   | hivrna    | 1 (1,1)                               | est = 0, error = 0, z = 2.16, p = 0.031         |
| CNAG_05662 | 14 | 910742 | b  | UTR-3      | AMP       | 12.92 (1,166.43)                      | est = 2.56, error = 1.3, z = 1.96, p = 0.05     |
| CNAG_05662 | 14 | 910834 | b  | downstream | Survival  | 0.994 (0.9885,0.9996)                 | est = -0.01, error = 0, z = -2.12, p = 0.034    |
| CNAG_05662 | 14 | 910926 | b  | downstream | SERT      | NA                                    | est = -0.36, error = 0.18, z = -1.99, p = 0.046 |
| CNAG_05662 | 14 | 910966 | b  | downstream | Survival  | 0.9933 (0.9885,0.998)                 | est = -0.01, error = 0, z = -2.77, p = 0.006    |
| CNAG_05662 | 14 | 911262 | b  | downstream | MCP1      | 1.63 (1.02,2.59)                      | est = 0.49, error = 0.24, z = 2.06, p = 0.039   |
| CNAG_05662 | 14 | 911292 | b  | downstream | IL2       | 1.66 (1.01,2.74)                      | est = 0.51, error = 0.25, z = 2, p = 0.045      |
| CNAG_05662 | 14 | 911308 | b  | downstream | adherence | 227.24 (1.95,26486)                   | est = 5.43, error = 2.43, z = 2.23, p = 0.025   |
| CNAG_05662 | 14 | 911321 | b  | downstream | IL5       | 1.95 (1.02,3.74)                      | est = 0.67, error = 0.33, z = 2.02, p = 0.043   |
| CNAG_05662 | 14 | 911352 | b  | downstream | MCP1      | 0.67 (0.45,1)                         | est = -0.4, error = 0.2, z = -1.98, p = 0.048   |
| CNAG_05662 | 14 | 910822 | ab | downstream | Survival  | 0.994 (0.989,0.9991)                  | est = -0.01, error = 0, z = -2.32, p = 0.02     |
| CNAG_05662 | 14 | 910822 | ab | downstream | FLC       | 1.05 (1,1.1)                          | est = 0.05, error = 0.02, z = 1.98, p = 0.047   |
| CNAG_05662 | 14 | 910939 | ab | downstream | growth    | 6808134.83 (3.38,13731197477679.4)    | est = 15.73, error = 7.41, z = 2.12, p = 0.034  |
| CNAG_05662 | 14 | 910939 | ab | downstream | SERT      | NA                                    | est = -0.5, error = 0.25, z = -2.01, p = 0.044  |
| CNAG_05662 | 14 | 910964 | ab | downstream | Survival  | 0.9935 (0.9887,0.9982)                | est = -0.01, error = 0, z = -2.68, p = 0.007    |
| CNAG_05662 | 14 | 910964 | ab | downstream | AMP       | NA                                    | est = -2.75, error = 1.39, z = -1.97, p = 0.048 |
| CNAG_05662 | 14 | 910979 | ab | downstream | Survival  | 0.9951 (0.9903,0.9999)                | est = 0, error = 0, z = -2.01, p = 0.045        |
| CNAG_05662 | 14 | 910979 | ab | downstream | uptake    | NA                                    | est = -3.3, error = 1.6, z = -2.06, p = 0.04    |
| CNAG_05662 | 14 | 911099 | ab | downstream | IL12      | 1.97 (1.03,3.78)                      | est = 0.68, error = 0.33, z = 2.04, p = 0.041   |
| CNAG_05662 | 14 | 911099 | ab | downstream | GMCSF     | 2.36 (1.01,5.54)                      | est = 0.86, error = 0.43, z = 1.98, p = 0.048   |
| CNAG_05662 | 14 | 911099 | ab | downstream | MCP1      | 1.66 (1.08,2.55)                      | est = 0.51, error = 0.22, z = 2.32, p = 0.021   |
| CNAG_05662 | 14 | 911099 | ab | downstream | TNFa      | 2.15 (1.03,4.47)                      | est = 0.76, error = 0.37, z = 2.04, p = 0.042   |
| CNAG_05662 | 14 | 911099 | ab | downstream | growth    | 334412.19 (1.67,67113909729.92)       | est = 12.72, error = 6.23, z = 2.04, p = 0.041  |
| CNAG_05662 | 14 | 911129 | ab | downstream | IL12      | 2.32 (1.18,4.55)                      | est = 0.84, error = 0.34, z = 2.44, p = 0.015   |
| CNAG_05662 | 14 | 911129 | ab | downstream | IL13      | 1.36 (1.04,1.78)                      | est = 0.31, error = 0.14, z = 2.26, p = 0.024   |
| CNAG_05662 | 14 | 911129 | ab | downstream | IL17      | 2.67 (1.13,6.33)                      | est = 0.98, error = 0.44, z = 2.23, p = 0.026   |
| CNAG_05662 | 14 | 911129 | ab | downstream | MIP1b     | 2.1 (1.04,4.26)                       | est = 0.74, error = 0.36, z = 2.06, p = 0.039   |
| CNAG_05662 | 14 | 911129 | ab | downstream | TNFa      | 2.26 (1.14,4.47)                      | est = 0.82, error = 0.35, z = 2.35, p = 0.019   |
| CNAG_05662 | 14 | 911129 | ab | downstream | growth    | 168095118.56 (19.27,1466671649037040) | est = 18.94, error = 8.15, z = 2.32, p = 0.02   |
| CNAG_05662 | 14 | 911129 | ab | downstream | FLC       | 1.08 (1.01,1.15)                      | est = 0.07, error = 0.03, z = 2.11, p = 0.035   |
| CNAG_05662 | 14 | 911129 | ab | downstream | AMP       | NA                                    | est = -2.7, error = 1.36, z = -1.98, p = 0.048  |
| CNAG_05662 | 14 | 911129 | ab | downstream | SERT      | NA                                    | est = -0.55, error = 0.25, z = -2.25, p = 0.025 |
| CNAG_05662 | 14 | 911206 | ab | downstream | IL8       | 1.9 (1.01,3.57)                       | est = 0.64, error = 0.32, z = 1.98, p = 0.048   |

|            |    |         |    |            |           |                                                                  |                                                 |
|------------|----|---------|----|------------|-----------|------------------------------------------------------------------|-------------------------------------------------|
| CNAG_05662 | 14 | 911206  | ab | downstream | MCP1      | 1.87 (1.17,3)                                                    | est = 0.63, error = 0.24, z = 2.6, p = 0.009    |
| CNAG_05662 | 14 | 911206  | ab | downstream | MIP1b     | 2.15 (1.01,4.58)                                                 | est = 0.77, error = 0.38, z = 1.99, p = 0.046   |
| CNAG_05663 | 14 | 910323  | b  | downstream | TNFa      | 0.5 (0.27,0.92)                                                  | est = -0.69, error = 0.31, z = -2.22, p = 0.026 |
| CNAG_05663 | 14 | 910555  | b  | downstream | Survival  | 0.9951 (0.9905,0.9998)                                           | est = 0, error = 0, z = -2.06, p = 0.039        |
| CNAG_05663 | 14 | 910328  | ab | downstream | IL1b      | 0.43 (0.19,0.97)                                                 | est = -0.84, error = 0.41, z = -2.04, p = 0.041 |
| CNAG_05663 | 14 | 910328  | ab | downstream | IL13      | 0.75 (0.57,0.99)                                                 | est = -0.28, error = 0.14, z = -2, p = 0.045    |
| CNAG_05663 | 14 | 910328  | ab | downstream | TNFa      | 0.45 (0.23,0.86)                                                 | est = -0.8, error = 0.33, z = -2.42, p = 0.015  |
| CNAG_05913 | 7  | 1205599 | ab | upstream   | MIP1b     | 2.26 (1.04,4.92)                                                 | est = 0.82, error = 0.4, z = 2.07, p = 0.039    |
| CNAG_05913 | 7  | 1205599 | ab | upstream   | adherence | 89.41 (1.77,4515.37)                                             | est = 4.49, error = 2, z = 2.25, p = 0.025      |
| CNAG_05913 | 7  | 1205600 | ab | upstream   | IL13      | 1.3 (1,1.69)                                                     | est = 0.26, error = 0.13, z = 1.98, p = 0.048   |
| CNAG_05913 | 7  | 1205600 | ab | upstream   | IL17      | 2.36 (1.02,5.46)                                                 | est = 0.86, error = 0.43, z = 2.01, p = 0.044   |
| CNAG_05913 | 7  | 1205600 | ab | upstream   | MIP1b     | 2.3 (1.05,5.05)                                                  | est = 0.83, error = 0.4, z = 2.08, p = 0.038    |
| CNAG_05913 | 7  | 1205600 | ab | upstream   | adherence | 86.82 (1.72,4382.67)                                             | est = 4.46, error = 2, z = 2.23, p = 0.026      |
| CNAG_05937 | 7  | 1263610 | a  | UTR-5      | uptake    | NA                                                               | est = -3.16, error = 1.52, z = -2.08, p = 0.038 |
| CNAG_05937 | 7  | 1263610 | a  | UTR-5      | SERT      | 1.38 (1.02,1.86)                                                 | est = 0.32, error = 0.15, z = 2.1, p = 0.036    |
| CNAG_05987 | 12 | 14009   | b  | ns         | IL2       | 0.58 (0.37,0.92)                                                 | est = -0.55, error = 0.23, z = -2.34, p = 0.019 |
| CNAG_05987 | 12 | 14035   | b  | ns         | IL2       | 1.54 (1.03,2.28)                                                 | est = 0.43, error = 0.2, z = 2.13, p = 0.034    |
| CNAG_05987 | 12 | 15014   | b  | UTR-5      | adherence | 152.66 (1.58,14704.12)                                           | est = 5.03, error = 2.33, z = 2.16, p = 0.031   |
| CNAG_06169 | 12 | 502808  | b  | UTR-3      | IL8       | 0.5 (0.26,0.96)                                                  | est = -0.7, error = 0.34, z = -2.09, p = 0.037  |
| CNAG_06169 | 12 | 503311  | b  | UTR-3      | GCSF      | 0.15 (0.03,0.79)                                                 | est = -1.92, error = 0.86, z = -2.23, p = 0.025 |
| CNAG_06169 | 12 | 502888  | ab | UTR-3      | GMCSF     | 0.43 (0.19,0.98)                                                 | est = -0.84, error = 0.42, z = -2, p = 0.046    |
| CNAG_06169 | 12 | 502888  | ab | UTR-3      | growth    | 637044.06 (1.59,254738795304.8)                                  | est = 13.36, error = 6.58, z = 2.03, p = 0.042  |
| CNAG_06169 | 12 | 502890  | ab | UTR-3      | IL6       | 0.69 (0.49,0.98)                                                 | est = -0.37, error = 0.18, z = -2.09, p = 0.037 |
| CNAG_06169 | 12 | 502890  | ab | UTR-3      | IL8       | 0.52 (0.27,1)                                                    | est = -0.65, error = 0.33, z = -1.97, p = 0.049 |
| CNAG_06169 | 12 | 502890  | ab | UTR-3      | GMCSF     | 0.36 (0.14,0.91)                                                 | est = -1.03, error = 0.47, z = -2.17, p = 0.03  |
| CNAG_06169 | 12 | 503049  | ab | UTR-3      | GMCSF     | 2.7 (1.06,6.89)                                                  | est = 0.99, error = 0.48, z = 2.08, p = 0.037   |
| CNAG_06169 | 12 | 503049  | ab | UTR-3      | hivrna    | 1 (1,1)                                                          | est = 0, error = 0, z = 2.19, p = 0.028         |
| CNAG_06169 | 12 | 503112  | ab | UTR-3      | hivrna    | 1 (1,1)                                                          | est = 0, error = 0, z = -2.16, p = 0.031        |
| CNAG_06169 | 12 | 503112  | ab | UTR-3      | csf_wbc   | 1.02 (1,1.04)                                                    | est = 0.02, error = 0.01, z = 2.2, p = 0.028    |
| CNAG_06169 | 12 | 503313  | ab | UTR-3      | IL12      | 1.78 (1.02,3.1)                                                  | est = 0.58, error = 0.28, z = 2.03, p = 0.042   |
| CNAG_06169 | 12 | 503313  | ab | UTR-3      | IL13      | 1.32 (1.01,1.72)                                                 | est = 0.28, error = 0.14, z = 2.04, p = 0.041   |
| CNAG_06169 | 12 | 503313  | ab | UTR-3      | GCSF      | 0.14 (0.03,0.77)                                                 | est = -1.97, error = 0.87, z = -2.26, p = 0.024 |
| CNAG_06169 | 12 | 503321  | ab | UTR-3      | IL12      | 2.44 (1.22,4.87)                                                 | est = 0.89, error = 0.35, z = 2.52, p = 0.012   |
| CNAG_06169 | 12 | 503321  | ab | UTR-3      | IL13      | 1.37 (1.04,1.8)                                                  | est = 0.31, error = 0.14, z = 2.23, p = 0.026   |
| CNAG_06169 | 12 | 503321  | ab | UTR-3      | GCSF      | 0.15 (0.03,0.84)                                                 | est = -1.92, error = 0.89, z = -2.15, p = 0.031 |
| CNAG_06169 | 12 | 503321  | ab | UTR-3      | MIP1b     | 2.27 (1.03,4.97)                                                 | est = 0.82, error = 0.4, z = 2.04, p = 0.041    |
| CNAG_06169 | 12 | 503327  | ab | UTR-3      | IL12      | 2.25 (1.15,4.41)                                                 | est = 0.81, error = 0.34, z = 2.38, p = 0.017   |
| CNAG_06169 | 12 | 503327  | ab | UTR-3      | IL13      | 1.31 (1.01,1.7)                                                  | est = 0.27, error = 0.13, z = 2.01, p = 0.044   |
| CNAG_06169 | 12 | 503327  | ab | UTR-3      | MIP1b     | 2.17 (1,4.68)                                                    | est = 0.77, error = 0.39, z = 1.97, p = 0.049   |
| CNAG_06169 | 12 | 503401  | ab | UTR-3      | IL10      | 2.85 (1.15,7.08)                                                 | est = 1.05, error = 0.46, z = 2.26, p = 0.024   |
| CNAG_06169 | 12 | 503401  | ab | UTR-3      | chitin    | 1.0007 (1,1.0014)                                                | est = 0, error = 0, z = 2.02, p = 0.044         |
| CNAG_06256 | 13 | 11130   | b  | upstream   | TNFa      | 0.42 (0.21,0.84)                                                 | est = -0.87, error = 0.35, z = -2.45, p = 0.014 |
| CNAG_06256 | 13 | 11118   | ab | upstream   | IFNg      | 0.6 (0.38,0.97)                                                  | est = -0.51, error = 0.24, z = -2.1, p = 0.036  |
| CNAG_06256 | 13 | 11118   | ab | upstream   | TNFa      | 0.45 (0.22,0.91)                                                 | est = -0.8, error = 0.36, z = -2.21, p = 0.027  |
| CNAG_06332 | 13 | 219311  | b  | upstream   | efa       | 119853562388238492018898108416 (6907942.89,2.07947237642355e+51) | est = 66.96, error = 26.13, z = 2.56, p = 0.01  |

|            |    |         |    |                 |           |                                                         |                                                   |
|------------|----|---------|----|-----------------|-----------|---------------------------------------------------------|---------------------------------------------------|
| CNAG_06332 | 13 | 219312  | b  | upstream        | efa       | 1.60006999119291e+35 (29822873.86,8.58476613812001e+62) | est = 81.06, error = 32.58, z = 2.49, p = 0.013   |
| CNAG_06422 | 13 | 436551  | b  | UTR-5           | IL2       | 1.5 (1.02,2.19)                                         | est = 0.4, error = 0.19, z = 2.06, p = 0.039      |
| CNAG_06422 | 13 | 436554  | b  | UTR-5           | IL2       | 1.5 (1.02,2.19)                                         | est = 0.4, error = 0.19, z = 2.06, p = 0.039      |
| CNAG_06490 | 13 | 655915  | a  | frameshift      | hivrna    | 1 (1,1)                                                 | est = 0, error = 0, z = 2.5, p = 0.012            |
| CNAG_06490 | 13 | 655915  | a  | frameshift      | cd4       | 1.06 (1,1.12)                                           | est = 0.06, error = 0.03, z = 2.12, p = 0.034     |
| CNAG_06525 | 7  | 11056   | ab | ns              | IL5       | 2.2 (1.09,4.46)                                         | est = 0.79, error = 0.36, z = 2.19, p = 0.028     |
| CNAG_06525 | 7  | 11056   | ab | ns              | IL10      | 2.7 (1.1,6.67)                                          | est = 0.99, error = 0.46, z = 2.16, p = 0.031     |
| CNAG_06525 | 7  | 14006   | ab | upstream        | IL6       | 0.69 (0.49,0.99)                                        | est = -0.36, error = 0.18, z = -2.03, p = 0.043   |
| CNAG_06525 | 7  | 14006   | ab | upstream        | IL8       | 0.49 (0.25,0.97)                                        | est = -0.71, error = 0.35, z = -2.04, p = 0.041   |
| CNAG_06574 | 7  | 164473  | b  | upstream        | hivrna    | 1 (1,1)                                                 | est = 0, error = 0, z = -1.98, p = 0.047          |
| CNAG_06574 | 7  | 165027  | b  | upstream        | MIP1b     | 0.4 (0.18,0.89)                                         | est = -0.92, error = 0.41, z = -2.24, p = 0.025   |
| CNAG_06574 | 7  | 165873  | b  | upstream        | IL13      | 1.34 (1.02,1.77)                                        | est = 0.29, error = 0.14, z = 2.07, p = 0.039     |
| CNAG_06574 | 7  | 166309  | b  | upstream        | growth    | 6311961.93 (2.64,15118988811853.8)                      | est = 15.66, error = 7.49, z = 2.09, p = 0.037    |
| CNAG_06574 | 7  | 167135  | b  | upstream        | IL13      | 0.69 (0.51,0.92)                                        | est = -0.38, error = 0.15, z = -2.54, p = 0.011   |
| CNAG_06574 | 7  | 167224  | b  | upstream        | GMCSF     | 0.35 (0.13,0.9)                                         | est = -1.06, error = 0.49, z = -2.17, p = 0.03    |
| CNAG_06574 | 7  | 164887  | ab | upstream        | IL2       | 1.64 (1.03,2.61)                                        | est = 0.49, error = 0.24, z = 2.08, p = 0.038     |
| CNAG_06574 | 7  | 164887  | ab | upstream        | TNFa      | 0.53 (0.29,0.97)                                        | est = -0.63, error = 0.31, z = -2.05, p = 0.04    |
| CNAG_06574 | 7  | 164926  | ab | upstream        | IL2       | 0.56 (0.33,0.95)                                        | est = -0.58, error = 0.27, z = -2.16, p = 0.031   |
| CNAG_06574 | 7  | 164926  | ab | upstream        | MIP1b     | 2.18 (1.07,4.43)                                        | est = 0.78, error = 0.36, z = 2.15, p = 0.031     |
| CNAG_06574 | 7  | 165704  | ab | upstream        | Survival  | 1.0048 (1.0001,1.0096)                                  | est = 0, error = 0, z = 2, p = 0.045              |
| CNAG_06574 | 7  | 165704  | ab | upstream        | efa       | 0 (0,0.4)                                               | est = -25.89, error = 12.75, z = -2.03, p = 0.042 |
| CNAG_06574 | 7  | 167292  | ab | upstream        | IL1b      | 0.43 (0.19,0.98)                                        | est = -0.84, error = 0.42, z = -2.01, p = 0.045   |
| CNAG_06574 | 7  | 167292  | ab | upstream        | GCSF      | 11.82 (1.55,89.87)                                      | est = 2.47, error = 1.04, z = 2.39, p = 0.017     |
| CNAG_06574 | 7  | 167292  | ab | upstream        | MIP1b     | 0.3 (0.11,0.82)                                         | est = -1.19, error = 0.51, z = -2.35, p = 0.019   |
| CNAG_06574 | 7  | 167292  | ab | upstream        | uptake    | NA                                                      | est = -3.5, error = 1.58, z = -2.22, p = 0.027    |
| CNAG_06574 | 7  | 167370  | ab | upstream        | cd4       | 1.09 (1.01,1.18)                                        | est = 0.09, error = 0.04, z = 2.23, p = 0.026     |
| CNAG_06574 | 7  | 167370  | ab | upstream        | uptake    | NA                                                      | est = -4.03, error = 1.67, z = -2.42, p = 0.016   |
| CNAG_06704 | 2  | 270700  | a  | upstream        | IL2       | 1.45 (1.01,2.09)                                        | est = 0.37, error = 0.18, z = 2.03, p = 0.042     |
| CNAG_06704 | 2  | 270700  | a  | upstream        | protein   | 0.9998 (0.9996,1)                                       | est = 0, error = 0, z = -2.2, p = 0.028           |
| CNAG_06876 | 5  | 7093    | a  | UTR-3           | IFNg      | 0.53 (0.29,0.96)                                        | est = -0.64, error = 0.3, z = -2.11, p = 0.035    |
| CNAG_06876 | 5  | 7093    | a  | UTR-3           | MIP1b     | 0.44 (0.21,0.95)                                        | est = -0.81, error = 0.39, z = -2.08, p = 0.037   |
| CNAG_06876 | 5  | 7093    | a  | UTR-3           | TNFa      | 0.47 (0.24,0.93)                                        | est = -0.75, error = 0.35, z = -2.16, p = 0.031   |
| CNAG_06968 | 8  | 1383765 | a  | CODON_INSERTION | IL12      | 0.56 (0.32,0.97)                                        | est = -0.58, error = 0.28, z = -2.07, p = 0.038   |
| CNAG_06968 | 8  | 1383765 | a  | CODON_INSERTION | IL17      | 0.45 (0.21,0.97)                                        | est = -0.8, error = 0.39, z = -2.05, p = 0.041    |
| CNAG_07026 | 12 | 11092   | ab | upstream        | IL1b      | 2.34 (1.04,5.26)                                        | est = 0.85, error = 0.41, z = 2.06, p = 0.039     |
| CNAG_07026 | 12 | 11092   | ab | upstream        | IL13      | 1.34 (1.01,1.77)                                        | est = 0.29, error = 0.14, z = 2.01, p = 0.045     |
| CNAG_07026 | 12 | 11092   | ab | upstream        | Survival  | 1.0083 (1.0013,1.0153)                                  | est = 0.01, error = 0, z = 2.32, p = 0.02         |
| CNAG_07026 | 12 | 11092   | ab | upstream        | efa       | 0 (0,0.2)                                               | est = -27.82, error = 13.37, z = -2.08, p = 0.037 |
| CNAG_07026 | 12 | 11094   | ab | upstream        | IL13      | 1.4 (1.02,1.93)                                         | est = 0.34, error = 0.16, z = 2.06, p = 0.04      |
| CNAG_07026 | 12 | 11094   | ab | upstream        | LFA_Titer | 0.43 (0.19,0.99)                                        | est = -0.84, error = 0.42, z = -1.99, p = 0.047   |
| CNAG_07026 | 12 | 11094   | ab | upstream        | Survival  | 1.0075 (1.0001,1.0149)                                  | est = 0.01, error = 0, z = 2, p = 0.046           |
| CNAG_07026 | 12 | 11400   | ab | upstream        | IL1b      | 0.37 (0.15,0.93)                                        | est = -1, error = 0.47, z = -2.12, p = 0.034      |
| CNAG_07026 | 12 | 11400   | ab | upstream        | IL7       | 0.27 (0.07,0.98)                                        | est = -1.32, error = 0.67, z = -1.99, p = 0.047   |
| CNAG_07026 | 12 | 11400   | ab | upstream        | IL13      | 0.71 (0.51,1)                                           | est = -0.34, error = 0.17, z = -1.96, p = 0.05    |
| CNAG_07026 | 12 | 11400   | ab | upstream        | LFA_Titer | 3.91 (1.23,12.37)                                       | est = 1.36, error = 0.59, z = 2.32, p = 0.021     |

|            |    |         |    |          |           |                   |                                                   |
|------------|----|---------|----|----------|-----------|-------------------|---------------------------------------------------|
| CNAG_07026 | 12 | 11406   | ab | upstream | IL1b      | 0.37 (0.15,0.93)  | est = -1, error = 0.47, z = -2.12, p = 0.034      |
| CNAG_07026 | 12 | 11406   | ab | upstream | IL7       | 0.27 (0.07,0.98)  | est = -1.32, error = 0.67, z = -1.99, p = 0.047   |
| CNAG_07026 | 12 | 11406   | ab | upstream | IL13      | 0.71 (0.51,1)     | est = -0.34, error = 0.17, z = -1.96, p = 0.05    |
| CNAG_07026 | 12 | 11406   | ab | upstream | LFA_Titer | 3.91 (1.23,12.37) | est = 1.36, error = 0.59, z = 2.32, p = 0.021     |
| CNAG_07026 | 12 | 11407   | ab | upstream | IL1b      | 0.37 (0.15,0.93)  | est = -1, error = 0.47, z = -2.12, p = 0.034      |
| CNAG_07026 | 12 | 11407   | ab | upstream | IL7       | 0.27 (0.07,0.98)  | est = -1.32, error = 0.67, z = -1.99, p = 0.047   |
| CNAG_07026 | 12 | 11407   | ab | upstream | IL13      | 0.71 (0.51,1)     | est = -0.34, error = 0.17, z = -1.96, p = 0.05    |
| CNAG_07026 | 12 | 11407   | ab | upstream | LFA_Titer | 3.91 (1.23,12.37) | est = 1.36, error = 0.59, z = 2.32, p = 0.021     |
| CNAG_07026 | 12 | 11410   | ab | upstream | IL1b      | 0.37 (0.15,0.93)  | est = -1, error = 0.47, z = -2.12, p = 0.034      |
| CNAG_07026 | 12 | 11410   | ab | upstream | IL7       | 0.27 (0.07,0.98)  | est = -1.32, error = 0.67, z = -1.99, p = 0.047   |
| CNAG_07026 | 12 | 11410   | ab | upstream | IL13      | 0.71 (0.51,1)     | est = -0.34, error = 0.17, z = -1.96, p = 0.05    |
| CNAG_07026 | 12 | 11410   | ab | upstream | LFA_Titer | 3.91 (1.23,12.37) | est = 1.36, error = 0.59, z = 2.32, p = 0.021     |
| CNAG_07026 | 12 | 11413   | ab | upstream | IL1b      | 0.38 (0.15,0.95)  | est = -0.98, error = 0.47, z = -2.08, p = 0.038   |
| CNAG_07026 | 12 | 11413   | ab | upstream | LFA_Titer | 3.91 (1.23,12.37) | est = 1.36, error = 0.59, z = 2.32, p = 0.021     |
| CNAG_07703 | 7  | 1341024 | a  | ns       | IL6       | 0.63 (0.43,0.91)  | est = -0.47, error = 0.19, z = -2.42, p = 0.015   |
| CNAG_07703 | 7  | 1341024 | a  | ns       | IL8       | 0.48 (0.24,0.94)  | est = -0.74, error = 0.34, z = -2.15, p = 0.032   |
| CNAG_07837 | 10 | 13558   | b  | UTR-5    | IL2       | 1.5 (1.02,2.19)   | est = 0.4, error = 0.19, z = 2.06, p = 0.039      |
| CNAG_07837 | 10 | 15302   | b  | UTR-3    | cd4       | 0.83 (0.68,1)     | est = -0.19, error = 0.1, z = -1.96, p = 0.049    |
| CNAG_07950 | 1  | 975397  | b  | upstream | efa       | 0 (0,0.01)        | est = -31.27, error = 13.51, z = -2.32, p = 0.021 |
| CNAG_07950 | 1  | 975152  | ab | upstream | IL8       | 2.67 (1.12,6.34)  | est = 0.98, error = 0.44, z = 2.23, p = 0.026     |
| CNAG_07950 | 1  | 975152  | ab | upstream | hivrna    | 1 (1,1)           | est = 0, error = 0, z = 1.98, p = 0.048           |
| CNAG_07950 | 1  | 975212  | ab | upstream | IL4       | 0.45 (0.23,0.92)  | est = -0.79, error = 0.36, z = -2.21, p = 0.027   |
| CNAG_07950 | 1  | 975212  | ab | upstream | IL6       | 0.65 (0.47,0.91)  | est = -0.43, error = 0.17, z = -2.48, p = 0.013   |
| CNAG_07950 | 1  | 975212  | ab | upstream | IL8       | 0.32 (0.14,0.75)  | est = -1.13, error = 0.43, z = -2.62, p = 0.009   |
| CNAG_07950 | 1  | 975212  | ab | upstream | GMCSF     | 0.4 (0.17,0.92)   | est = -0.92, error = 0.42, z = -2.17, p = 0.03    |
| CNAG_07950 | 1  | 975212  | ab | upstream | IFNg      | 0.51 (0.28,0.93)  | est = -0.67, error = 0.31, z = -2.18, p = 0.029   |
| CNAG_07950 | 1  | 975212  | ab | upstream | FLC       | NA                | est = -0.06, error = 0.03, z = -2.11, p = 0.034   |
| CNAG_08006 | 11 | 804710  | ab | UTR-5    | IL4       | 0.41 (0.18,0.94)  | est = -0.89, error = 0.42, z = -2.11, p = 0.035   |
| CNAG_08006 | 11 | 804710  | ab | UTR-5    | IL5       | 0.32 (0.13,0.84)  | est = -1.13, error = 0.48, z = -2.33, p = 0.02    |
| CNAG_08006 | 11 | 804710  | ab | UTR-5    | IL6       | 0.71 (0.51,0.99)  | est = -0.34, error = 0.17, z = -2.02, p = 0.043   |
| CNAG_08006 | 11 | 804710  | ab | UTR-5    | MIP1b     | 0.39 (0.16,0.97)  | est = -0.93, error = 0.46, z = -2.04, p = 0.042   |
| CNAG_08006 | 11 | 804710  | ab | UTR-5    | TNFa      | 0.34 (0.14,0.84)  | est = -1.07, error = 0.46, z = -2.35, p = 0.019   |
| CNAG_08006 | 11 | 804710  | ab | UTR-5    | adherence | NA                | est = -4.63, error = 2.32, z = -1.99, p = 0.046   |
| CNAG_08006 | 11 | 804710  | ab | UTR-5    | chitin    | NA                | est = 0, error = 0, z = -1.99, p = 0.047          |
| CNAG_08006 | 11 | 804742  | ab | UTR-5    | IL4       | 0.49 (0.25,0.96)  | est = -0.72, error = 0.34, z = -2.08, p = 0.038   |
| CNAG_08006 | 11 | 804742  | ab | UTR-5    | IFNg      | 0.6 (0.37,0.97)   | est = -0.51, error = 0.25, z = -2.09, p = 0.036   |
| CNAG_08006 | 11 | 804742  | ab | UTR-5    | MCP1      | 0.57 (0.34,0.95)  | est = -0.56, error = 0.26, z = -2.16, p = 0.031   |
| CNAG_08006 | 11 | 804742  | ab | UTR-5    | adherence | NA                | est = -6.75, error = 2.65, z = -2.54, p = 0.011   |
| CNAG_12610 | 7  | 49744   | a  | upstream | MCP1      | 0.65 (0.43,0.98)  | est = -0.43, error = 0.21, z = -2.06, p = 0.039   |
| CNAG_12610 | 7  | 49744   | a  | upstream | uptake    | NA                | est = -3.86, error = 1.77, z = -2.19, p = 0.029   |
| CNAG_13108 | 13 | 128625  | ab | upstream | IL13      | 0.74 (0.55,1)     | est = -0.3, error = 0.15, z = -1.97, p = 0.049    |
| CNAG_13108 | 13 | 128625  | ab | upstream | GCSF      | 8.41 (1.28,55.01) | est = 2.13, error = 0.96, z = 2.22, p = 0.026     |
| CNAG_13108 | 13 | 128715  | ab | upstream | IL13      | 0.59 (0.39,0.89)  | est = -0.53, error = 0.21, z = -2.55, p = 0.011   |
| CNAG_13108 | 13 | 128715  | ab | upstream | GCSF      | 8.04 (1.29,50.02) | est = 2.08, error = 0.93, z = 2.23, p = 0.025     |
| CNAG_13108 | 13 | 128729  | ab | upstream | IL13      | 0.65 (0.43,0.96)  | est = -0.44, error = 0.2, z = -2.16, p = 0.031    |

|            |    |        |    |          |       |                  |
|------------|----|--------|----|----------|-------|------------------|
| CNAG_13108 | 13 | 128729 | ab | upstream | GCSF  | 6.7 (1.06,42.24) |
| CNAG_13204 | 14 | 924025 | b  | upstream | GMCSF | 3.18 (1.22,8.29) |
| CNAG_13204 | 14 | 924047 | b  | upstream | IL13  | 1.41 (1.06,1.86) |
| CNAG_13204 | 14 | 924049 | b  | upstream | IL13  | 1.41 (1.06,1.86) |
| CNAG_13204 | 14 | 924050 | b  | upstream | IL13  | 1.41 (1.06,1.86) |

est = 1.9, error = 0.94, z = 2.02, p = 0.043  
est = 1.16, error = 0.49, z = 2.37, p = 0.018  
est = 0.34, error = 0.14, z = 2.4, p = 0.017  
est = 0.34, error = 0.14, z = 2.4, p = 0.017  
est = 0.34, error = 0.14, z = 2.4, p = 0.017
