# Supplementary material for: Identification of Pathogen Genomic Differences That Impact Human Immune Response and Disease during Cryptococcus neoformans Infection
Source: PubMed Central journal article supplement (PMC6635531; doi:10.1128/mbio.01440-19), 2019-07-16
Supplement: mBio.01440-19-st007.pdf [file mBio.01440-19-st007.pdf]

**Table S7. The majority of genes associated with quantitative infection phenotypes are uncharacterized**

| <b>Gene</b> | <b>Class</b> | <b>Orthology</b>                                    | <b>Description</b>                     | <b>Significant PCA</b> | <b>KO survival</b> |
|-------------|--------------|-----------------------------------------------------|----------------------------------------|------------------------|--------------------|
| CNAG_00014  | b            | basidio                                             | hypothetical protein                   |                        |                    |
| CNAG_00363  | b            | basidio                                             | TCO6                                   |                        | no effect          |
| CNAG_01241  | ab           | conserved                                           | enzyme regulator                       | yes                    |                    |
| CNAG_01371  | a            | conserved                                           | CRG2, regulator of G protein signaling |                        |                    |
| CNAG_01802  | b            | conserved                                           | DRE2                                   |                        |                    |
| CNAG_02112  | b            | basidio                                             | ubiquitin-conjugating enzyme E2 W      |                        |                    |
| CNAG_02176  | ab           | <i>C. gattii</i>                                    | hypothetical protein                   | yes                    | decreased          |
| CNAG_02177  | a            | conserved                                           | PP2A catalytic subunit                 |                        |                    |
| CNAG_02475  | ab           | basidio                                             | flavin-containing monooxygenase        |                        |                    |
| CNAG_02798  | a            | conserved                                           | hypothetical protein                   |                        |                    |
| CNAG_04100  | ab           | basidio                                             | hypothetical                           |                        |                    |
| CNAG_04102  | a            | <i>C. gattii</i> , <i>Puccinia graminis</i>         | hypothetical protein                   |                        |                    |
| CNAG_04179  | a            | conserved                                           | lysine-tRNA ligase                     |                        |                    |
| CNAG_04373  | ab           | basidio                                             | alginate lyase                         |                        | no effect          |
| CNAG_04535  | a            | conserved                                           | dehydrogenase                          |                        | no effect          |
| CNAG_04922  | b            | <i>C.gattii</i>                                     | hypothetical protein                   |                        | increased          |
| CNAG_05185  | ab           | <i>C.gattii</i>                                     | hypothetical protein                   |                        |                    |
| CNAG_05450  | a            | <i>Tremella</i> , <i>Melampsora larici-populina</i> | hypothetical protein                   | yes                    |                    |
| CNAG_05661  | ab           | conserved                                           | FACT complex subunit POB3              | yes                    |                    |
| CNAG_05662  | ab           | conserved                                           | ITR4                                   | yes                    | increased          |
| CNAG_05663  | ab           | conserved                                           | WHI3/SCW1                              | yes                    | no effect          |
| CNAG_05913  | ab           | conserved                                           | alpha gluconidase                      |                        | no effect          |
| CNAG_05937  | ab           | <i>C.gattii</i>                                     | hypothetical protein                   |                        | no effect          |
| CNAG_05987  | b            | <i>C.gattii</i>                                     | hypothetical protein                   | yes                    |                    |
| CNAG_06169  | ab           | conserved                                           | hypothetical protein                   | yes                    | no effect          |
| CNAG_06256  | ab           | basidio                                             | hypothetical protein                   |                        |                    |
| CNAG_06332  | b            | <i>C. gattii</i> , <i>Tremella mesenterica</i>      | hypothetical protein                   |                        | decreased          |
| CNAG_06422  | b            | basidio                                             | hypothetical protein                   |                        |                    |
| CNAG_06490  | a            | <i>C.gattii</i>                                     | CAMK/CAMKL protein kinase              |                        | no effect          |
| CNAG_06525  | ab           | none                                                | nuclear protein                        |                        |                    |
| CNAG_06574  | ab           | <i>C. gattii</i>                                    | APP1                                   |                        | decreased          |
| CNAG_06704  | a            | basidio                                             | hypothetical protein                   |                        |                    |

|            |    |           |                      |     |           |
|------------|----|-----------|----------------------|-----|-----------|
| CNAG_06876 | a  | conserved | dioxygenase          |     | no effect |
| CNAG_06968 | a  | conserved | co-chaperone GrpE    |     | increased |
| CNAG_07026 | ab | C.gattii  | hypothetical protein |     |           |
| CNAG_07727 |    | none      | hypothetical protein | yes |           |
| CNAG_07703 | a  | C.gattii  | hypothetical protein | yes | no effect |
| CNAG_07837 | b  | none      | hypothetical protein |     | no effect |
| CNAG_07950 | ab | C. gattii | hypothetical protein | yes |           |
| CNAG_08006 | ab | none      | hypothetical protein | yes |           |
| CNAG_12610 | a  | NA        | hypothetical RNA     |     |           |
| CNAG_13108 | ab | NA        | hypothetical RNA     |     |           |
| CNAG_13204 | b  | NA        | hypothetical RNA     |     |           |
